# Supplementary material
Source: PubMed Central journal article supplement (PMC7047436)

Supporting Information for

## Catalytic chemoselective *O*-phosphorylation of alcohols

K. Domon, M. Puripat, K. Fujiyoshi, M. Hatanaka, S. A. Kawashima,  
K. Yamatsugu\*, and M. Kanai\*

Correspondence to: [kanai@mol.f.u-tokyo.ac.jp](mailto:kanai@mol.f.u-tokyo.ac.jp) (M.K.), [yamatsugu@mol.f.u-tokyo.ac.jp](mailto:yamatsugu@mol.f.u-tokyo.ac.jp) (K.Y.)

## Table of contents

|                                                                                                   |     |
|---------------------------------------------------------------------------------------------------|-----|
| <b>Materials and Methods</b>                                                                      |     |
| General                                                                                           | S3  |
| Synthesis of peptides                                                                             | S4  |
| Preparation of PEP-H                                                                              | S10 |
| Synthesis of phosphobenzylsulfate                                                                 | S10 |
| Synthesis of <sup>34</sup> S-labeled tetrabutylammonium hydrogen sulfate ( <sup>34</sup> S-TBAHS) | S11 |
| General procedures for catalytic phosphorylation of alcohols                                      | S12 |
| Reaction of POS ( <b>42</b> ) with 3-phenyl-1-propanol with varied amount of PEP-K                | S13 |
| Characterization of phosphorylated products                                                       | S14 |
| Computational Details                                                                             | S28 |
| <b>Supplementary Tables, Figures</b>                                                              | S29 |
| <b>References</b>                                                                                 | S48 |
| <b>Cartesian Coordinates of the Critical Points</b>                                               | S50 |
| <b>Spectral Data</b>                                                                              | S72 |

## Materials and Methods

### General

NMR spectra were recorded on JEOL ECX500 (500 MHz for  $^1\text{H}$  NMR, 126 MHz for  $^{13}\text{C}$  NMR), and JEOL ECS400 (400 MHz for  $^1\text{H}$  NMR, 101 MHz for  $^{13}\text{C}$  NMR and 162 MHz for  $^{31}\text{P}$  NMR) spectrometers. Chemical shifts were reported in ppm on the  $\delta$  scale relative to residual  $\text{CHD}_2\text{S}(\text{O})\text{CD}_3$  ( $\delta = 2.50$  for  $^1\text{H}$  NMR and  $\delta = 39.5$  for  $^{13}\text{C}$  NMR), HDO ( $\delta = 4.79$  for  $^1\text{H}$  NMR),  $\text{CHD}_2\text{OD}$  ( $\delta = 3.31$  for  $^1\text{H}$  NMR and  $\delta = 49.0$  for  $^{13}\text{C}$  NMR), or  $\text{CHD}_2\text{CN}$  ( $\delta = 1.94$  for  $^1\text{H}$  NMR and  $\delta = 118.2$  for  $^{13}\text{C}$  NMR) as an internal reference, and 85%  $\text{H}_3\text{PO}_4$  aq. ( $\delta = 0$  for  $^{31}\text{P}$  NMR) as an external reference, respectively.

Preparative HPLC was conducted by using a JASCO HPLC system equipped with a UV-2075 spectrometer, PU-2086 pumps, a DG-2080-53 degasser, and an MX-2080-32 mixer. General eluent was linear gradient of MeCN in 0.1% TFA (LC-MS grade) aq. (2% acetonitrile for 3 min, followed by a linear gradient of 2–100% acetonitrile over 60 min. YMC-Triart C18, 254 nm), unless otherwise stated. C18 reverse phase column was used at 40 °C, unless otherwise stated.

Analytical HPLC was conducted by using a JASCO HPLC system equipped with a UV-2075 spectrometer, PU-2080 pumps, a DG-2080-54 degasser, and an MX-2080-32 mixer. General eluent was linear gradient of MeCN in 0.1% TFA (LC-MS grade) aq. (2% acetonitrile for 3 min, followed by a linear gradient of 2–90% acetonitrile over 13 min. YMC-Triart C18, 230 nm), unless otherwise stated. C18 reverse phase column was used at 40 °C, unless otherwise stated.

MQ means distilled water purified with a Millipore Milli-Q water purification system (Merck K. Ga. Co., Darmstadt, Germany).

LC-MS analysis was conducted by using an Agilent Technologies LC-MS (ESI) system equipped with a 1260 Infinity High Performance Degasser, an Agilent 1260 Infinity Binary Pump, a 1260 Infinity Standard Autosampler, a 1290 Infinity Thermostatted Column Compartment, a 1260 Infinity Variable Wavelength Detector, and an Agilent 6120 Single Quadrupole LC-MS or Shimadzu LCMS-2020. Retention times (Rt/min) were recorded using a gradient elution method of 2 – 90% B over 13 min, where solution A consisted of water (buffered with 0.1%  $\text{HCO}_2\text{H}$ ) and solution B consisted of acetonitrile (LC-MS grade) unless otherwise stated. C18 reverse phase column (2.0  $\times$  50 mm; YMC-Triart C18; YMC Co., Ltd.) was used at 40 °C at a flow rate of 0.2 mL/min. The eluent was monitored by absorbance at 230 nm, unless otherwise stated.

MALDI-TOF MS was obtained with a Shimadzu Biotech Axima ToF<sup>2</sup> spectrometer.

LC-MS/MS analyses were conducted using AB Sciex Triple TOF 4600 equipped with eksigent ekspert microLC 200. LC was carried out as follows: 3C18-CL-120 column (0.5 mm I.D  $\times$  100 mm) using a linear gradient of 2–35% acetonitrile with 0.1% formic acid (v/v) versus water with 0.1% formic acid (v/v) over 8 min at 40 °C with a flow rate of 20  $\mu\text{L}/\text{min}$ .

Reactions were carried out in dry solvents under an argon atmosphere, unless otherwise stated.  $^{34}\text{S}$ -Labeled  $\text{H}_2\text{SO}_4$  was purchased from Shoko Science. Other reagents were used as received from commercial sources (Aldrich, TCI, or Wako), unless otherwise stated.

## Synthesis of peptides

### Bz-Ser-Ala-Tyr-NH<sub>2</sub> (**a**):

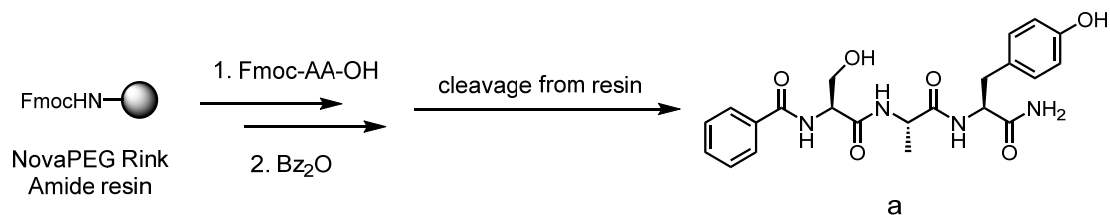

Peptide (**a**) was synthesized on a solid phase in 0.196 mmol scale using NovaPEG Rink Amide resin. Fmoc-amino acid (3.0 equiv.) was sequentially coupled using a DIEA-COMU method in DMF for 60 min (3.0 equiv. each) at r.t. after removal of each Fmoc group with 20% piperidine-DMF for 10 min. After the last removal of Fmoc group, benzoic anhydride (5.0 equiv.) in CH<sub>2</sub>Cl<sub>2</sub> was added, and stirred for 10 min. The peptide was cleaved from the resin by treatment with TFA in the presence of TIPS and H<sub>2</sub>O (95:2.5:2.5) for 90 min at r.t., concentrated under reduced pressure, and precipitated with ether to afford crude **a**, which was purified with preparative HPLC to afford the target peptide (**a**, 23.8 mg, 0.0538 mmol, 27% yield) as white solids after lyophilization.

ESI-MS  $m/z$  443.2 [M+H]<sup>+</sup>, Retention time (LC/MS): 6.9 min.

### Bz-Thr-Ala-Tyr-NH<sub>2</sub> (**b**):

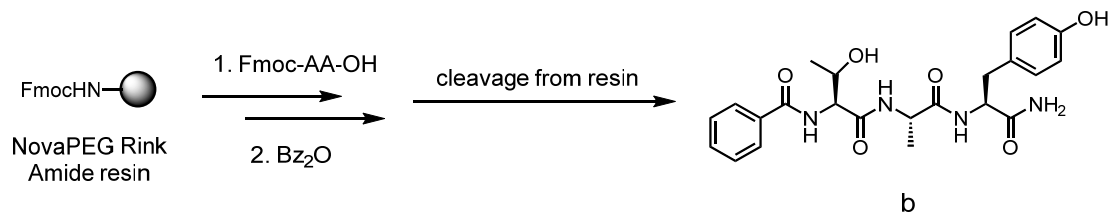

Peptide (**b**) was synthesized on a solid phase in 0.294 mmol scale using NovaPEG Rink Amide resin. Fmoc-amino acid (3.0 equiv.) was sequentially coupled using a DIEA-COMU method in DMF for 60 min (3.0 equiv. each) at r.t. after removal of each Fmoc group with 20% piperidine-DMF for 10 min. After the last removal of Fmoc group, benzoic anhydride (5.0 equiv.) in CH<sub>2</sub>Cl<sub>2</sub> was added, and stirred for 10 min. The peptide was cleaved from the resin by treatment with TFA in the presence of TIPS and H<sub>2</sub>O (95:2.5:2.5) for 90 min at r.t., concentrated under reduced pressure, and precipitated with ether to afford crude **b**, which was purified with preparative HPLC to afford the target peptide (**b**, 20.9 mg, 0.0458 mmol, 16% yield) as white solids after lyophilization.

ESI-MS  $m/z$  457.4 [M+H]<sup>+</sup>, Retention time (LC/MS): 6.7 min.

**Bz-Ser-Ala-Asp-NH<sub>2</sub> (c):**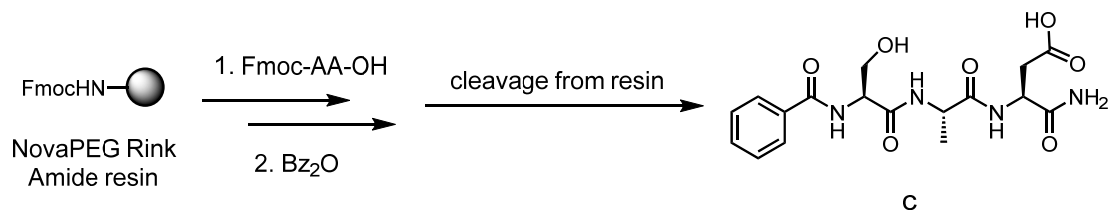

Peptide (c) was synthesized on a solid phase in 0.196 mmol scale using NovaPEG Rink Amide resin. Fmoc-amino acid (3.0 equiv.) was sequentially coupled using a DIEA-COMU method in DMF for 60 min (3.0 equiv. each) at r.t. after removal of each Fmoc group with 20% piperidine-DMF for 10 min. After the last removal of Fmoc group, benzoic anhydride (5.0 equiv.) in CH<sub>2</sub>Cl<sub>2</sub> was added and stirred for 10 min. The peptide was cleaved from the resin by treatment with TFA in the presence of TIPS and H<sub>2</sub>O (95:2.5:2.5) for 90 min at r.t., concentrated under reduced pressure, and precipitated with ether to afford crude **c**, which was purified with preparative HPLC to afford the target peptide (**c**, 17.9 mg, 0.0454 mmol, 23% yield) as white solids after lyophilization.

ESI-MS *m/z* 395.2 [M+H]<sup>+</sup>, Retention time (LC/MS): 5.8 min.

**Bz-Ser-Ala-Trp-NH<sub>2</sub> (d):**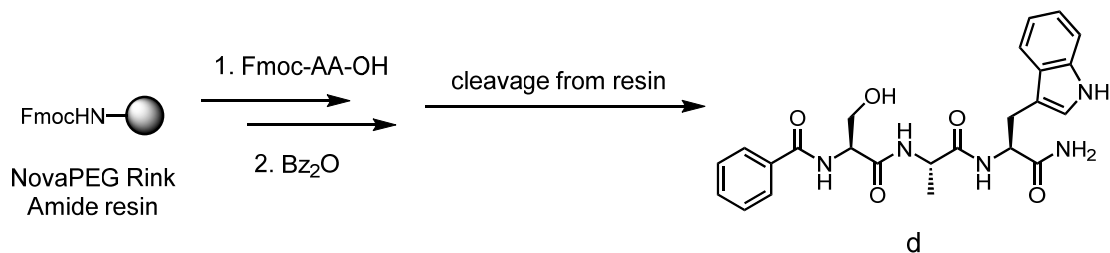

Peptide (d) was synthesized on a solid phase in 0.196 mmol scale using NovaPEG Rink Amide resin. Fmoc-amino acid (3.0 equiv.) was sequentially coupled using a DIEA-COMU method in DMF for 60 min (3.0 equiv. each) at r.t. after removal of each Fmoc group with 20% piperidine-DMF for 10 min. After the last removal of Fmoc group, benzoic anhydride (5.0 equiv.) in CH<sub>2</sub>Cl<sub>2</sub> was added, and stirred for 10 min. The peptide was cleaved from the resin by treatment with TFA in the presence of TIPS and H<sub>2</sub>O (95:2.5:2.5) for 90 min at r.t., concentrated under reduced pressure, and precipitated with ether to afford crude **d**, which was purified with preparative HPLC to afford the target peptide (**d**, 21.4 mg, 0.0460 mmol, 23% yield) as white solids after lyophilization.

ESI-MS *m/z* 466.2 [M+H]<sup>+</sup>, Retention time (LC/MS): 6.9 min.

**Bz-Ser-Ala-Met-NH<sub>2</sub> (e):**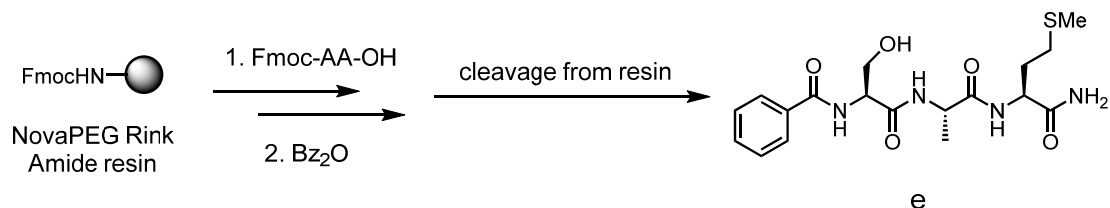

Peptide (e) was synthesized on a solid phase in 0.196 mmol scale using NovaPEG Rink Amide resin. Fmoc-amino acid (3.0 equiv.) was sequentially coupled using a DIEA-COMU method in DMF for 60 min (3.0 equiv. each) at r.t. after removal of each Fmoc group with 20% piperidine-DMF for 10 min. After the last removal of Fmoc group, benzoic anhydride (5.0 equiv.) in CH<sub>2</sub>Cl<sub>2</sub> was added, and stirred for 10 min. The peptide was cleaved from the resin by treatment with TFA in the presence of TIPS and H<sub>2</sub>O (95:2.5:2.5) for 90 min at r.t., concentrated under reduced pressure, and precipitated with ether to afford crude e, which was purified with preparative HPLC to afford the target peptide (e, 28.0 mg, 0.0682 mmol, 35% yield) as white solids after lyophilization.

ESI-MS *m/z* 411.2 [M+H]<sup>+</sup>, Retention time (LC/MS): 7.0 min.

**Bz-Ser-Ala-Cys(*t*BuS)-NH<sub>2</sub> (g):**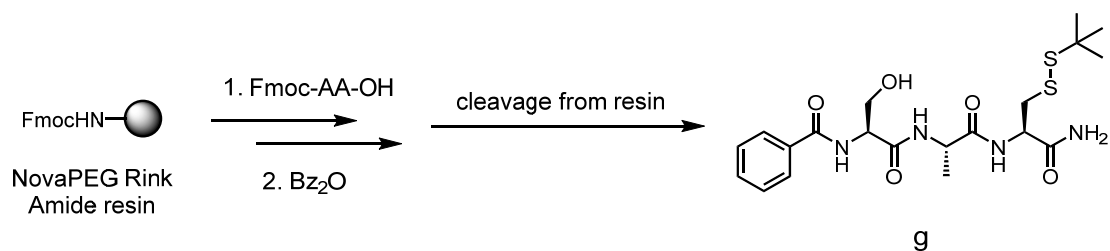

Peptide (g) was synthesized on a solid phase in 0.196 mmol scale using NovaPEG Rink Amide resin. Fmoc-amino acid (3.0 equiv.) was sequentially coupled using a DIEA-COMU method in DMF for 60 min (3.0 equiv. each) at r.t. after removal of each Fmoc group with 20% piperidine-DMF for 10 min. After the last removal of Fmoc group, benzoic anhydride (5.0 equiv.) in CH<sub>2</sub>Cl<sub>2</sub> was added, and stirred for 10 min. The peptide was cleaved from the resin by treatment with TFA in the presence of TIPS and H<sub>2</sub>O (95:2.5:2.5) for 90 min at r.t., concentrated under reduced pressure, and precipitated with ether to afford crude g, which was purified with preparative HPLC to afford the target peptide (g, 24.5 mg, 0.0521 mmol, 27% yield) as white solids after lyophilization.

ESI-MS *m/z* 471.2 [M+H]<sup>+</sup>, Retention time (LC/MS): 7.6 min.

**Bz-Ser-Ala-His-NH<sub>2</sub> TFA salt (h):**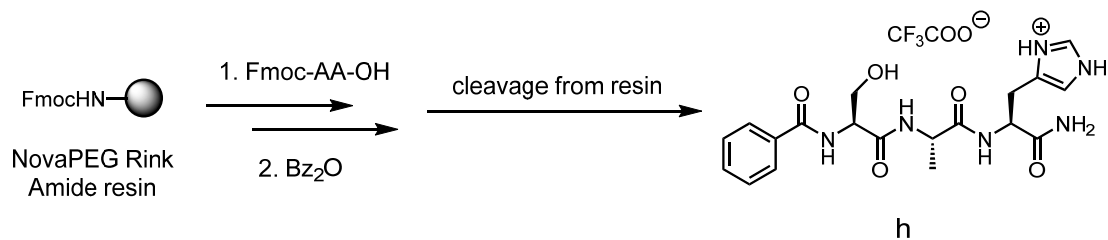

Peptide (**h**) was synthesized on a solid phase in 0.147 mmol scale using NovaPEG Rink Amide resin. Fmoc-amino acid (3.0 equiv.) was sequentially coupled using a DIEA-COMU method in DMF for 60 min (3.0 equiv. each) at r.t. after removal of each Fmoc group with 20% piperidine-DMF for 10 min. After the last removal of Fmoc group, benzoic anhydride (5.0 equiv.) in CH<sub>2</sub>Cl<sub>2</sub> was added, and stirred for 10 min. The peptide was cleaved from the resin by treatment with TFA in the presence of TIPS and H<sub>2</sub>O (95:2.5:2.5) for 90 min at r.t., concentrated under reduced pressure, and precipitated with ether to afford crude **h**, which was purified with preparative HPLC to afford the target peptide (**h**, 18.7 mg, 0.0353 mmol, 24% yield) as white solids after lyophilization.

ESI-MS *m/z* 417.2 [M+H]<sup>+</sup>, Retention time (LC/MS): 5.6 min.

**Bz-Ser-Ala-Arg-NH<sub>2</sub> TFA salt (i):**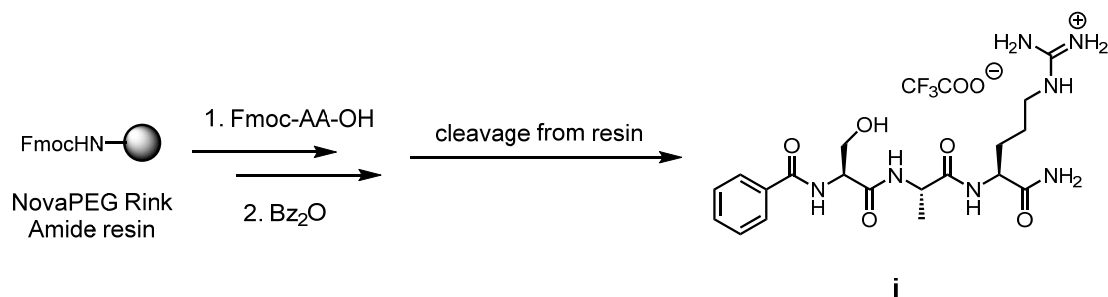

Peptide (**i**) was synthesized on a solid phase in 0.147 mmol scale using NovaPEG Rink Amide resin. Fmoc-amino acid (3.0 equiv.) was sequentially coupled using a DIEA-COMU method in DMF for 60 min (3.0 equiv. each) at r.t. after removal of each Fmoc group with 20% piperidine-DMF for 10 min. After the last removal of Fmoc group, benzoic anhydride (5.0 equiv.) in CH<sub>2</sub>Cl<sub>2</sub> was added, and stirred for 10 min. The peptide was cleaved from the resin by treatment with TFA in the presence of TIPS and H<sub>2</sub>O (95:2.5:2.5) for 90 min at r.t., concentrated under reduced pressure, and precipitated with ether to afford crude **i**, which was purified with preparative HPLC to afford the target peptide (**i**, 14.3 mg, 0.0260 mmol, 18% yield) as white solids after lyophilization.

ESI-MS *m/z* 436.3 [M+H]<sup>+</sup>, Retention time (LC/MS): 5.6 min.

**Bz-Ser-Ala-Lys(Me)-NH<sub>2</sub> TFA salt (j):**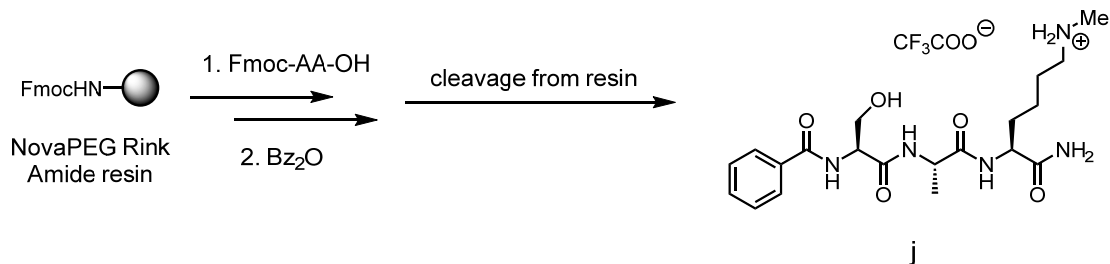

Peptide (**j**) was synthesized on a solid phase in 0.196 mmol scale using NovaPEG Rink Amide resin. Fmoc-amino acid (3.0 equiv.) was sequentially coupled using a DIEA-COMU method in DMF for 60 min (3.0 equiv. each) at r.t. after removal of each Fmoc group with 20% piperidine-DMF for 10 min. After the last removal of Fmoc group, benzoic anhydride (5.0 equiv.) in CH<sub>2</sub>Cl<sub>2</sub> was added, and stirred for 10 min. The peptide was cleaved from the resin by treatment with TFA in the presence of TIPS and H<sub>2</sub>O (95:2.5:2.5) for 90 min at r.t., concentrated under reduced pressure, and precipitated with ether to afford crude **j**, which was purified with preparative HPLC to afford the target peptide (**j**, 12.0 mg, 0.0224 mmol, 11% yield) as white solids after lyophilization.

ESI-MS *m/z* 422.3 [M+H]<sup>+</sup>, Retention time (LC/MS): 5.7 min.

**Bz-Ser-Ala-Lys(Me)<sub>2</sub>-NH<sub>2</sub> TFA salt (k):**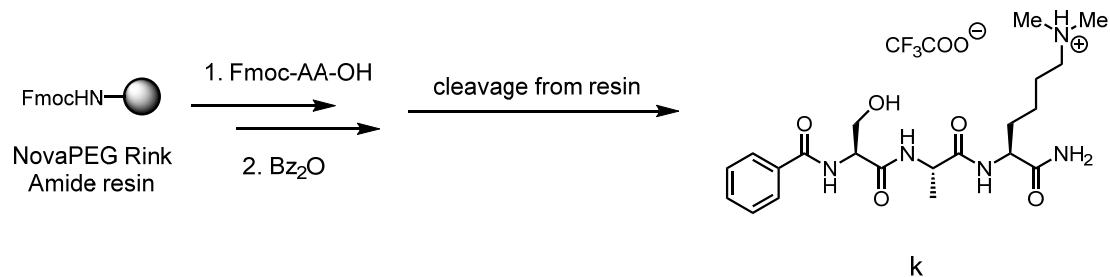

Peptide (**k**) was synthesized on a solid phase in 0.196 mmol scale using NovaPEG Rink Amide resin. Fmoc-amino acid (3.0 equiv.) was sequentially coupled using a DIEA-COMU method in DMF for 60 min (3.0 equiv. each) at r.t. after removal of each Fmoc group with 20% piperidine-DMF for 10 min. After the last removal of Fmoc group, benzoic anhydride (5.0 equiv.) in CH<sub>2</sub>Cl<sub>2</sub> was added, and stirred for 10 min. The peptide was cleaved from the resin by treatment with TFA in the presence of TIPS and H<sub>2</sub>O (95:2.5:2.5) for 90 min at r.t., concentrated under reduced pressure, and precipitated with ether to afford crude **k**, which was purified with preparative HPLC to afford the target peptide (**k**, 23.5 mg, 0.0428 mmol, 22% yield) as white solids after lyophilization.

ESI-MS *m/z* 436.3 [M+H]<sup>+</sup>, Retention time (LC/MS): 5.8 min.



**Ac-Arg-Arg-Ala-Thr-Val-Ala-NH<sub>2</sub> TFA salt (l):**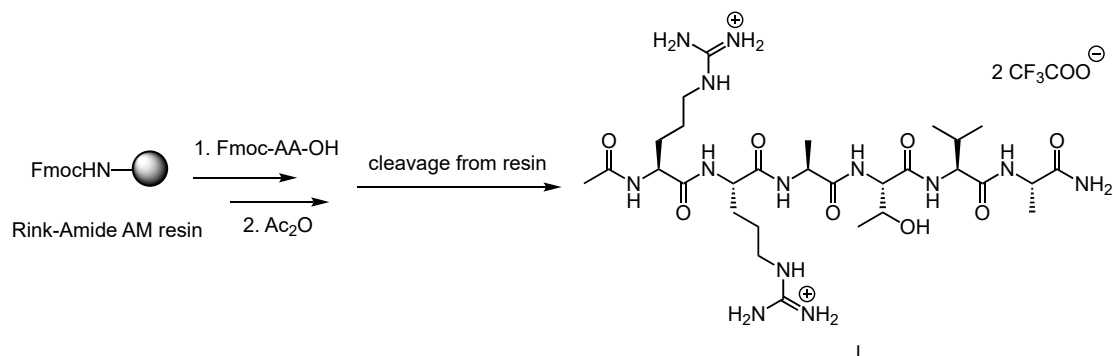

Peptide (**l**) was synthesized on a solid phase in 0.350 mmol scale using Rink Amide AM resin. Fmoc-amino acid (3.0 equiv.) was sequentially coupled using a DIEA-COMU method in DMF for 60 min (3.0 equiv. each) at r.t. after removal of each Fmoc group with 20% piperidine-DMF for 10 min. After the last removal of Fmoc group, 25% acetic anhydride in CH<sub>2</sub>Cl<sub>2</sub> was added, and stirred for 10 min. The peptide was cleaved from the resin by treatment with TFA in the presence of TIPS and H<sub>2</sub>O (95:2.5:2.5) for 90 min at r.t., concentrated under reduced pressure, and precipitated with ether to afford crude **l**, which was purified with preparative HPLC to afford the target peptide (**l**, 164.4 mg, 0.174 mmol, 50% yield) as white solids after lyophilization.

MALDI-TOF MS *m/z* 714.4 [M+H]<sup>+</sup>, Retention time (Analytical HPLC): 8.9 min.

**Ac-Asp-Ser-Gly-Glu-gly-Asp-Phe-Leu-Ala-Glu-Gly-Gly-Gly-Val-Arg-OH TFA salt (m):**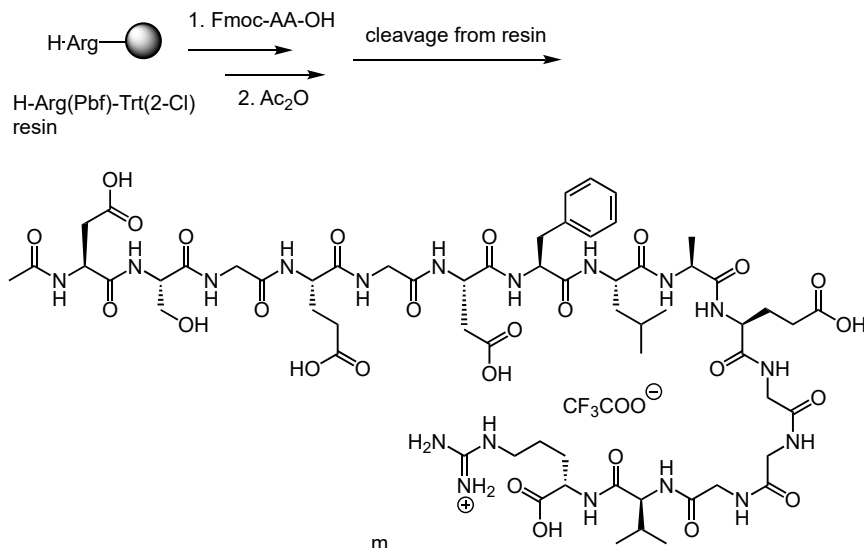

Peptide (**m**) was synthesized on a solid phase in 0.320 mmol scale using Rink Amide AM resin. Fmoc-amino acid (3.0 equiv.) was sequentially coupled using a DIEA-COMU method in DMF for 60 min (3.0 equiv. each) at r.t. after removal of each Fmoc group with 20% piperidine-DMF for 10 min. After the last removal of Fmoc group, 25% acetic anhydride in CH<sub>2</sub>Cl<sub>2</sub> was added, and stirred for 10 min. The peptide was cleaved from the resin by treatment with TFA in the presence of TIPS and H<sub>2</sub>O (95:2.5:2.5) for 90 min at r.t., concentrated under

reduced pressure, and precipitated with ether to afford crude **m**, which was purified with preparative HPLC to afford the target peptide (**m**, 25.3 mg, 0.0144 mmol, 5% yield) as white solids after lyophilization.

MALDI-TOF MS  $m/z$  1507.6  $[M+H]^+$ , Retention time (Analytical HPLC): 10.7 min.

### Preparation of PEP-H

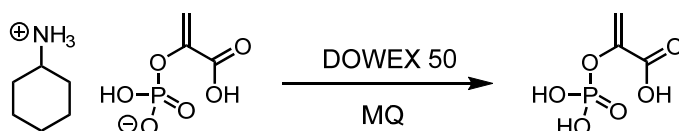

To a stirred solution of phosphoenolpyruvic acid cyclohexylammonium salt (534.4 mg, 2.00 mmol) in MQ, ion-exchange resin (DOWEX 50WX2-200) was added. After the mixture was stirred at r.t. for 1 min, resin was removed by filtration and washed with MQ three times. The filtrate was lyophilized to afford **PEP-H** (296.8 mg, 1.77 mmol, 88% yield) as white solid.  $^1\text{H}$  NMR ( $\text{D}_2\text{O}$ , 500 MHz)  $\delta$  5.76 (d,  $J = 2.3$  Hz, 1H), 5.40 (d,  $J = 2.3$  Hz, 1H)

### Synthesis of *O*-benzyl phosphosulfate

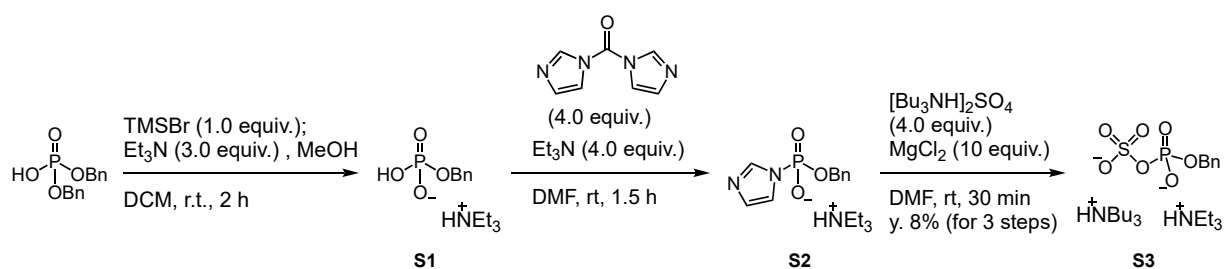

#### Benzyl hydrogen phosphate triethylammonium salt (S1):

An argon-flushed flask equipped with a magnetic stirrer bar was charged with dibenzyl phosphate (1.39 g, 5.00 mmol) and  $\text{CH}_2\text{Cl}_2$  (25.0 ml). To the reaction mixture, bromotrimethylsilane (638  $\mu\text{l}$ , 5.00 mmol) was added dropwise at 0  $^\circ\text{C}$ , and the mixture was warmed to r.t.. After stirring for 2 h,  $\text{Et}_3\text{N}$  (2.12 ml, 15.0 mmol) and MeOH (5.0 ml) were added. The reaction mixture was concentrated under vacuum to give crude **S1**, which was separated by preparative HPLC (Eluent was linear gradient of MeCN in 50 mM triethylammonium acetate aq. and C18 reverse phase column was used at r.t.) to give **S1** (1.39 g) as white solid, which was used for the next reaction without further purification. ESI-MS  $m/z$  187.0  $[M-H]^-$ .

#### Benzyl (1*H*-imidazol-1-yl)phosphonate triethylammonium salt (S2):

To a stirred solution of **S1** (1.18 g) in DMF (11.8 ml), 1,1'-carbonyldiimidazole (1.52 g, 9.40 mmol) and  $\text{Et}_3\text{N}$  (1.32 ml, 9.65 mmol) were added at r.t.. After stirring for 2 h, MeOH (10.0 ml) was added to the reaction mixture. The reaction mixture was concentrated under vacuum to give crude **S2**, which was separated by preparative HPLC (Eluent was linear gradient of MeCN in 50 mM triethylammonium acetate aq. and C18 reverse phase column was used at r.t.) to give **S2** (560 mg) as colorless oil, which was used for the next reaction without

further purification. ESI-MS  $m/z$  237.1 [M-H]<sup>-</sup>.

***O*-Benzyl phosphosulfate (S3):**

To a stirred solution of **S2** (560 mg) in DMF (4.17 ml), (Bu<sub>3</sub>NH)<sub>2</sub>SO<sub>4</sub> (1.56 g, 3.33 mmol) and MgCl<sub>2</sub> (794 mg, 8.34 mmol) were added at r.t.. After stirring for 30 min, water (5.0 ml) was added to the reaction mixture, and the mixture was purified by preparative HPLC (Eluent was linear gradient of MeCN in 50 mM triethylammonium acetate aq. and C18 reverse phase column was used at r.t..) to give *O*-benzyl phosphosulfate (**S3**, 215 mg, 0.388 mmol, 8% yield for 3 steps) as colorless oil. <sup>1</sup>H NMR (CD<sub>3</sub>CN, 500 MHz) δ 7.40 (d,  $J$  = 7.4 Hz, 2H), 7.34 (t,  $J$  = 7.4 Hz, 2H), 7.28 (t,  $J$  = 7.4 Hz, 2H), 4.95 (d,  $J$  = 6.9 Hz, 2H), 3.05 (q,  $J$  = 7.4 Hz, 6H), 2.96 (t,  $J$  = 8.6 Hz, 2H), 1.64 (m, 6H) 1.31 (q,  $J$  = 7.4 Hz, 6H), 1.21 (t,  $J$  = 7.4 Hz, 9H), 0.91 (t,  $J$  = 7.4 Hz, 9H); <sup>13</sup>C NMR (CD<sub>3</sub>CN, 126 MHz) δ 174.4, 139.8, 129.1, 128.3, 128.3, 68.2, 52.6, 46.5, 25.7, 21.9, 20.6, 13.9, 8.8; <sup>31</sup>P NMR (CD<sub>3</sub>OD, 162 MHz) δ -40.7; ESI-MS  $m/z$  267.0 [M-H]<sup>-</sup>; HRMS calcd for [C<sub>7</sub>H<sub>8</sub>O<sub>7</sub>PS]<sup>-</sup> requires  $m/z$  266.9734; found 266.9734.

**Synthesis of <sup>34</sup>S-labeled tetrabutylammonium hydrogen sulfate (<sup>34</sup>S-TBAHS)**

To a stirred solution of <sup>34</sup>S-sufluric acid aq. (2.6%, 1.20 mL, 312 μmol), tetrabutylammonium hydroxide aq. (40%, 202 μL, 312 μmol) was added at 4 °C, and the mixture was stirred for 1 h at the same temperature. Lyophilization of the mixture afforded <sup>34</sup>S-TBAHS (106 mg, 312 μmol, y. quant.) as white solids.

## **General procedures for catalytic phosphorylation of alcohols**

### **Procedure S (Standard)**

An argon-flushed test tube equipped with a magnetic stirrer bar was charged with substrate (1.0 equiv.), tetrabutylammonium hydrogen sulfate (0.30 equiv.) and phosphoenolpyruvate monopotassium salt (4.5 equiv.). To the reaction mixture, *N,N*-dimethylformamide (0.20 M) was added at r.t., and the mixture was warmed to 100 °C. After stirring for 6 h, the reaction mixture was cooled to r.t. and purified by preparative HPLC to give the corresponding phosphorylated product.

### **Procedure A**

An argon-flushed test tube equipped with a magnetic stirrer bar was charged with substrate (1.0 equiv.), tetrabutylammonium hydrogen sulfate (0.60 equiv.) and phosphoenolpyruvate monopotassium salt (6.0 equiv.). To the reaction mixture, *N,N*-dimethylformamide (0.20 M) was added at r.t., and the mixture was warmed to 100 °C. After stirring for 6 h, the reaction mixture was cooled to r.t. and purified by preparative HPLC to give the corresponding phosphorylated product.

### **Procedure B**

An argon-flushed test tube equipped with a magnetic stirrer bar was charged with substrate (1.0 equiv.), tetrabutylammonium hydrogen sulfate (0.60 equiv.) and phosphoenolpyruvate monopotassium salt (6.0 equiv.). To the reaction mixture, *N,N*-dimethylformamide (0.20 M) was added at r.t., and the mixture was warmed to 100 °C. After stirring for 3 h, the reaction mixture was cooled to r.t. and purified by preparative HPLC to give the corresponding phosphorylated product.

### **Procedure C**

An argon-flushed test tube equipped with a magnetic stirrer bar was charged with substrate (1.0 equiv.), tetrabutylammonium hydrogen sulfate (0.60 equiv.) and phosphoenolpyruvate monopotassium salt (10 equiv.). To the reaction mixture, *N,N*-dimethylformamide (0.20 M) was added at r.t., and the mixture was warmed to 100 °C. After stirring for 4.5 h, the reaction mixture was cooled to r.t. and purified by preparative HPLC to give the corresponding phosphorylated product.

### **Procedure D**

An argon-flushed test tube equipped with a magnetic stirrer bar was charged with substrate (1.0 equiv.), tetrabutylammonium hydrogen sulfate (0.60 equiv.) and phosphoenolpyruvate monopotassium salt (10 equiv.). To the reaction mixture, *N,N*-dimethylformamide (0.20 M) was added at r.t., and the mixture was warmed to 100 °C. After stirring for 3 h, the reaction mixture was cooled to r.t. and purified by preparative HPLC to give the corresponding phosphorylated product.

### **Procedure E**

An argon-flushed test tube equipped with a magnetic stirrer bar was charged with substrate (1.0 equiv.), tetrabutylammonium hydrogen sulfate (2.0 equiv.) and phosphoenolpyruvate monopotassium salt (50 equiv.). To the reaction mixture, *N,N*-dimethylformamide (0.0125 M) was added at r.t., and the mixture was warmed to 100 °C. After stirring for 3 h, the reaction mixture was cooled to r.t. and purified by preparative HPLC to give the corresponding phosphorylated product.

### **Reaction of POS (42) with 3-phenyl-1-propanol with varied amount of PEP-K**

An argon-flushed test tube equipped with a magnetic stirrer bar was charged with *O*-benzyl phosphosulfate (**S3**, 1.0 equiv.), Pd/C (30 wt%) and DMF (0.20 M). Hydrogen gas was, then, flushed, and the reaction mixture was stirred at r.t. for 30 min. The obtained crude solution of POS **42** was immediately used for the next reaction without further purification. To a stirred solution of the crude POS **42** in DMF (0.2 M) at r.t., 3-phenyl-1-propanol (1.0 equiv.) and PEP-K (0-4.5 equiv.) were added. The reaction mixture was stirred for 3 h at 100 °C, diluted with water/MeCN, and purified by preparative HPLC to give the corresponding phosphorylated (or sulfurylated) product.

## Characterization of phosphorylated products

### 3-Phenylpropyl dihydrogen phosphate (2):

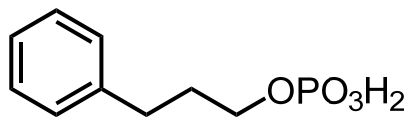

**General procedure S** (15.5 mg, 0.0717 mmol, 72% yield)

$^1\text{H}$  NMR ( $\text{CD}_3\text{OD}$ , 500 MHz)  $\delta$  7.25 (t,  $J = 7.4$  Hz, 2H), 7.20 (d,  $J = 7.4$  Hz, 2H), 7.15 (t,  $J = 7.4$  Hz, 1H), 3.97 (q,  $J = 6.3$  Hz, 2H), 2.71 (t,  $J = 7.4$  Hz, 2H), 1.95 (tt,  $J = 6.3$  Hz, 7.4 Hz, 2H);  $^{13}\text{C}$  NMR ( $\text{CD}_3\text{OD}$ , 126 MHz)  $\delta$  142.7, 129.5, 129.4, 127.0, 66.9 (d,  $J = 4.8$  Hz), 33.4 (d,  $J = 7.2$  Hz), 32.7;  $^{31}\text{P}$  NMR ( $\text{CD}_3\text{OD}$ , 162 MHz)  $\delta$  0.2; ESI-MS  $m/z$  215.1 [ $\text{M}-\text{H}$ ] $^-$ ; HRMS calcd for [ $\text{C}_9\text{H}_{12}\text{O}_4\text{P}$ ] $^-$  requires  $m/z$  215.0473; found 215.0474.

### 3-Bromophenethyl dihydrogen phosphate (3):

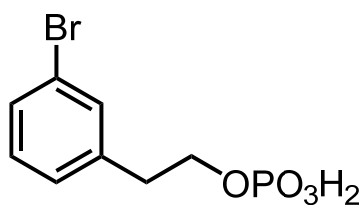

**General procedure S** (24.0 mg, 0.0853 mmol, 85% yield)

$^1\text{H}$  NMR ( $\text{CD}_3\text{OD}$ , 500 MHz)  $\delta$  7.45 (s, 1H), 7.36 (d,  $J = 8.0$  Hz, 1H), 7.25-7.16 (m, 2H), 4.15 (q,  $J = 6.9$  Hz, 2H), 2.95 (t,  $J = 6.9$  Hz, 2H);  $^{13}\text{C}$  NMR ( $\text{CD}_3\text{OD}$ , 126 MHz)  $\delta$  142.1, 133.0, 131.4, 130.6, 128.9, 123.2, 67.8 (d,  $J = 5.7$  Hz), 37.2 (d,  $J = 7.7$  Hz);  $^{31}\text{P}$  NMR ( $\text{CD}_3\text{OD}$ , 162 MHz)  $\delta$  0.0; ESI-MS  $m/z$  279.0 [ $\text{M}-\text{H}$ ] $^-$ ; HRMS calcd for [ $\text{C}_8\text{H}_9\text{BrO}_4\text{P}$ ] $^-$  requires  $m/z$  278.9422; found 278.9424.

### 2-Methoxyphenethyl dihydrogen phosphate (4):

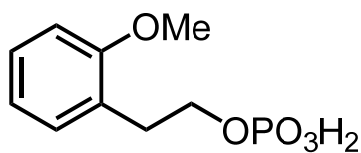

**General procedure S** (20.8 mg, 0.0897 mmol, 90% yield)

$^1\text{H}$  NMR ( $\text{CD}_3\text{OD}$ , 500 MHz)  $\delta$  7.21-7.14 (m, 2H), 6.92 (d,  $J = 7.7$  Hz, 1H), 6.85 (dd,  $J = 6.3$  Hz, 7.7 Hz, 1H), 4.10 (q,  $J = 7.4$  Hz, 2H), 3.81 (s, 3H), 2.97 (t,  $J = 7.4$  Hz, 2H);  $^{13}\text{C}$  NMR ( $\text{CD}_3\text{OD}$ , 126 MHz)  $\delta$  159.3, 131.9, 129.1, 126.4, 121.5, 111.4, 67.0 (d,  $J = 5.7$  Hz), 55.8, 32.7 (d,  $J = 7.7$  Hz);  $^{31}\text{P}$  NMR ( $\text{CD}_3\text{OD}$ , 162 MHz)  $\delta$  0.1; ESI-MS  $m/z$  231.1 [ $\text{M}-\text{H}$ ] $^-$ ; HRMS calcd for [ $\text{C}_9\text{H}_{12}\text{O}_5\text{P}$ ] $^-$  requires  $m/z$  231.0422; found 231.0423.

### 4-Cyanophenethyl dihydrogen phosphate (5):

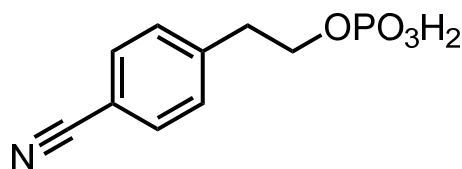

**General procedure S** (17.4 mg, 0.0765 mmol, 77% yield)

$^1\text{H}$  NMR ( $\text{CD}_3\text{OD}$ , 500 MHz)  $\delta$  7.65 (d,  $J = 8.3$  Hz, 2H), 7.46 (d,  $J = 8.3$  Hz, 2H), 4.19 (q,  $J = 6.9$  Hz, 2H), 3.05 (t,  $J = 6.9$  Hz, 2H);  $^{13}\text{C}$  NMR ( $\text{CD}_3\text{OD}$ , 126 MHz)  $\delta$  145.8, 133.3, 131.3, 120.0, 111.3, 67.4 (d,  $J = 5.7$  Hz), 37.7 (d,  $J = 7.7$  Hz);  $^{31}\text{P}$  NMR ( $\text{CD}_3\text{OD}$ , 162 MHz)  $\delta$  0.2; ESI-MS  $m/z$  226.1 [ $\text{M}-\text{H}$ ] $^-$ ; HRMS calcd for [ $\text{C}_9\text{H}_9\text{NO}_4\text{P}$ ] $^-$  requires  $m/z$  226.0269; found 226.0277.

### 3-(2-Ethynylphenyl)propyl dihydrogen phosphate (6):

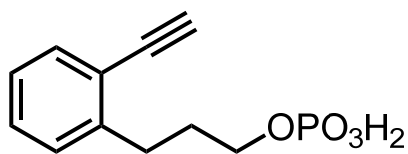

**General procedure S** (19.4 mg, 0.0806 mmol, 81% yield)

$^1\text{H}$  NMR ( $\text{CD}_3\text{OD}$ , 500 MHz)  $\delta$  7.43 (d,  $J = 8.0$  Hz, 1H), 7.27 (dt,  $J = 8.0$  Hz, 1.7 Hz, 2H), 7.16 (dt,  $J = 8.0$  Hz, 1.7 Hz, 1H), 3.98 (q,  $J = 6.7$  Hz, 2H), 3.67 (s, 1H), 2.90 (t,  $J = 8.0$  Hz, 2H), 1.99 (tt,  $J = 6.7$  Hz, 8.0 Hz, 2H);  $^{13}\text{C}$  NMR ( $\text{CD}_3\text{OD}$ , 126 MHz)  $\delta$  145.3, 133.9, 130.2, 130.0, 127.2, 123.0, 82.9, 82.6, 67.1 (d,  $J = 5.7$  Hz), 32.3 (d,  $J = 7.7$  Hz), 31.5;  $^{31}\text{P}$  NMR ( $\text{CD}_3\text{OD}$ , 162 MHz)  $\delta$  0.2; ESI-MS  $m/z$  239.1  $[\text{M}-\text{H}]^-$ ; HRMS calcd for  $[\text{C}_{11}\text{H}_{12}\text{O}_4\text{P}]^-$  requires  $m/z$  239.0473; found 239.0474.

### 3-(2-((Trimethylsilyl)ethynyl)phenyl)propyl dihydrogen phosphate (7):

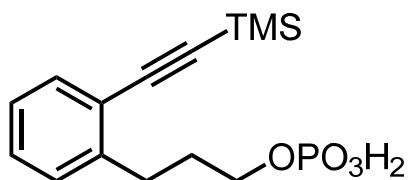

**General procedure S** (24.1 mg, 0.0772 mmol, 77% yield)

$^1\text{H}$  NMR ( $\text{CD}_3\text{OD}$ , 500 MHz)  $\delta$  7.14 (d,  $J = 7.4$  Hz, 1H), 7.04-6.99 (m, 2H), 6.91 (dt,  $J = 6.3$  Hz, 2.3 Hz, 1H), 3.74 (q,  $J = 6.6$  Hz, 2H), 2.63 (t,  $J = 7.7$  Hz, 2H), 1.75 (tt,  $J = 6.6$  Hz, 7.7 Hz, 2H), 0.00 (s, 9H);  $^{13}\text{C}$  NMR ( $\text{CD}_3\text{OD}$ , 126 MHz)  $\delta$  145.1, 133.4, 130.2, 129.9, 127.2, 123.7, 104.8, 98.7, 67.1 (d,  $J = 5.8$  Hz), 32.2 (d,  $J = 7.7$  Hz), 31.7, 0.0;  $^{31}\text{P}$  NMR ( $\text{CD}_3\text{OD}$ , 162 MHz)  $\delta$  0.2; ESI-MS  $m/z$  311.1  $[\text{M}-\text{H}]^-$ ; HRMS calcd for  $[\text{C}_{14}\text{H}_{20}\text{O}_4\text{PSi}]^-$  requires  $m/z$  311.0868; found 311.0871.

### 3-Formylphenethyl dihydrogen phosphate (8):

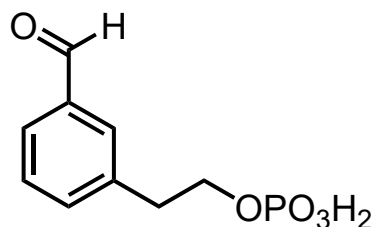

**General procedure S** (23.1 mg, 0.1004 mmol, 73% yield)

$^1\text{H}$  NMR ( $\text{CD}_3\text{CN}$ , 500 MHz)  $\delta$  9.95 (s, 1H), 7.76 (s, 1H), 7.74 (d,  $J = 7.4$  Hz, 1H), 7.55 (d,  $J = 7.4$  Hz, 1H), 7.49 (t,  $J = 7.4$  Hz, 1H), 4.20 (q,  $J = 6.9$  Hz, 2H), 3.03 (t,  $J = 6.3$  Hz, 2H);  $^{13}\text{C}$  NMR ( $\text{CD}_3\text{CN}$ , 126 MHz)  $\delta$  193.7, 140.1, 137.7, 136.1, 130.8, 130.1, 128.9, 67.9 (d,  $J = 4.8$  Hz), 36.6 (d,  $J = 7.2$  Hz);  $^{31}\text{P}$  NMR ( $\text{CD}_3\text{CN}$ , 162 MHz)  $\delta$  1.8; ESI-MS  $m/z$  229.1  $[\text{M}-\text{H}]^-$ ; HRMS calcd for  $[\text{C}_9\text{H}_{10}\text{O}_5\text{P}]^-$  requires  $m/z$  229.0266; found 229.0265.

### 3-(2-(Phosphonoxy)ethyl)benzoic acid (9):

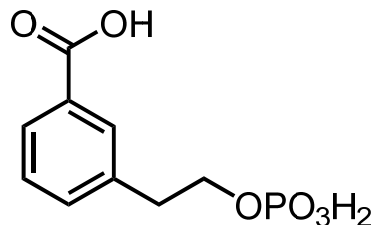

**General procedure S** (17.5 mg, 0.0710 mmol, 71% yield)

$^1\text{H}$  NMR ( $\text{CD}_3\text{OD}$ , 500 MHz)  $\delta$  7.93 (s, 1H), 7.88 (d,  $J = 7.8$  Hz, 1H), 7.51 (d,  $J = 7.8$  Hz, 1H), 7.40 (t,  $J = 7.8$  Hz, 1H), 4.18 (q,  $J = 6.9$  Hz, 2H), 3.04 (t,  $J = 6.9$  Hz, 2H);  $^{13}\text{C}$  NMR ( $\text{CD}_3\text{OD}$ , 126 MHz)  $\delta$  169.9, 139.8, 134.8, 132.1, 131.3, 129.6, 129.0, 68.0 (d,  $J = 5.8$  Hz), 37.5 (d,  $J = 7.7$  Hz);  $^{31}\text{P}$  NMR ( $\text{CD}_3\text{OD}$ , 162 MHz)  $\delta$  0.0; ESI-MS  $m/z$  245.1  $[\text{M}-\text{H}]^-$ ; HRMS calcd for  $[\text{C}_9\text{H}_{10}\text{O}_6\text{P}]^-$  requires  $m/z$  245.0215; found 245.0216.

**Cinnamyl dihydrogen phosphate (10):**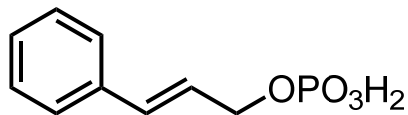**General procedure S** (16.6 mg, 0.0777 mmol, 78% yield)

<sup>1</sup>H NMR (CD<sub>3</sub>OD, 500 MHz) δ 7.41 (d, *J* = 8.3 Hz, 2H), 7.31 (dd, *J* = 8.3 Hz, 7.4 Hz, 2H), 7.24 (t, *J* = 7.4 Hz, 1H), 6.69 (d, *J* = 16.0 Hz, 1H), 6.36 (dt, *J* = 16.0 Hz, 6.3 Hz, 1H), 4.62 (dd, *J* = 6.3 Hz, 8.0 Hz, 1H); <sup>13</sup>C NMR (CD<sub>3</sub>OD, 126 MHz) δ 137.7, 133.9, 129.6, 129.0, 127.6, 125.5 (d, *J* = 7.2 Hz), 68.1 (d, *J* = 6.0 Hz); <sup>31</sup>P NMR (CD<sub>3</sub>OD, 162 MHz) δ 0.1; ESI-MS *m/z* 213.1 [M-H]<sup>-</sup>; HRMS calcd for [C<sub>9</sub>H<sub>10</sub>O<sub>4</sub>P]<sup>-</sup> requires *m/z* 213.0317; found 213.0316.

**4-Methylbenzyl dihydrogen phosphate (11):**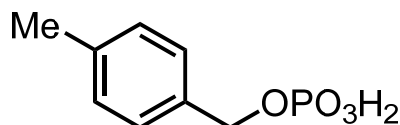**General procedure S** (14.1 mg, 0.0698 mmol, 70% yield)

<sup>1</sup>H NMR (CD<sub>3</sub>CN, 500 MHz) δ 7.26 (d, *J* = 8.0 Hz, 2H), 7.18 (d, *J* = 8.0 Hz, 2H), 4.95 (d, *J* = 6.9 Hz, 2H), 2.32 (s, 3H); <sup>13</sup>C NMR (CD<sub>3</sub>OD, 126 MHz) δ 139.1, 135.2, 130.1, 128.8, 69.1 (d, *J* = 6.0 Hz), 21.2; <sup>31</sup>P NMR (CD<sub>3</sub>OD, 162 MHz) δ 0.9; ESI-MS *m/z* 201.1 [M-H]<sup>-</sup>; HRMS calcd for [C<sub>8</sub>H<sub>10</sub>O<sub>4</sub>P]<sup>-</sup> requires *m/z* 201.0317; found 201.0317.

**4-Phenylbutan-2-yl dihydrogen phosphate (12):**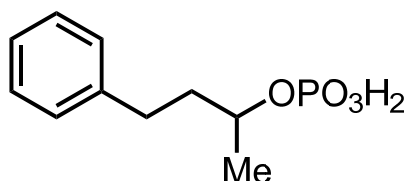**General procedure S** (16.4 mg, 0.0712 mmol, 71% yield)

<sup>1</sup>H NMR (CD<sub>3</sub>OD, 500 MHz) δ 7.27-7.10 (m, 5H), 4.44-4.34 (m, 1H), 2.78-2.60 (m, 2H), 1.96-1.76 (m, 2H), 1.34 (d, *J* = 6.3 Hz, 3H); <sup>13</sup>C NMR (CD<sub>3</sub>CN, 101 MHz) δ 142.8, 139.3, 129.2, 126.7, 75.9 (d, *J* = 5.7 Hz), 39.9 (d, *J* = 4.7 Hz), 32.0, 21.7; <sup>31</sup>P NMR (CD<sub>3</sub>OD, 162 MHz) δ -0.5; ESI-MS *m/z* 229.1 [M-H]<sup>-</sup>; HRMS calcd for [C<sub>10</sub>H<sub>14</sub>O<sub>4</sub>P]<sup>-</sup> requires *m/z* 229.0630; found 229.0631.

***tert*-Butyl (2-(4-(3-(phosphonoxy)propyl)phenoxy)ethyl)carbamate (13):**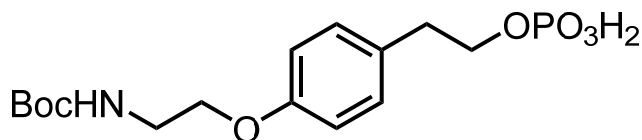**General procedure S** (26.1 mg, 0.0723 mmol, 72% yield)

<sup>1</sup>H NMR (CD<sub>3</sub>OD, 400 MHz) δ 7.16 (d, *J* = 9.2 Hz, 2H), 6.86 (d, *J* = 9.2 Hz, 2H), 4.09 (q, *J* = 7.3 Hz, 2H), 3.96 (t, *J* = 5.8 Hz, 2H), 3.40 (t, *J* = 5.8 Hz, 2H), 2.90 (t, *J* = 7.3 Hz, 2H), 1.43 (s, 9H); <sup>13</sup>C NMR (CD<sub>3</sub>OD, 101 MHz) δ 158.9, 158.6, 131.3, 131.1, 115.6, 80.4, 68.5 (d, *J* = 5.8 Hz), 67.9, 41.0, 36.9 (d, *J* = 7.7 Hz), 28.7; <sup>31</sup>P NMR (CD<sub>3</sub>OD, 162 MHz) δ 0.0; ESI-MS *m/z* 360.1 [M-H]<sup>-</sup>; HRMS calcd for [C<sub>15</sub>H<sub>23</sub>NO<sub>7</sub>P]<sup>-</sup> requires *m/z* 360.12121; found 360.1214.



**(9H-Fluoren-9-yl)methyl 4-(phosphonoxy)butylcarbamate (14):**

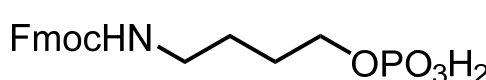 **General procedure S** (29.1 mg, 0.0745 mmol, 74% yield)  
 $^1\text{H NMR}$  ( $\text{CD}_3\text{OD}$ , 500 MHz)  $\delta$  7.76 (d,  $J = 7.4$  Hz, 2H), 7.61 (d,  $J = 7.4$  Hz, 2H), 7.37 (t,  $J = 7.4$  Hz, 2H), 7.30 (t,  $J = 7.4$  Hz, 2H), 4.33 (d,  $J = 6.3$  Hz, 2H), 4.15 (t,  $J = 6.3$  Hz, 1H), 3.96 (q,  $J = 6.3$  Hz, 2H), 3.10 (t,  $J = 6.3$  Hz, 2H), 1.66-1.50 (m, 4H);  $^{13}\text{C NMR}$  ( $\text{CD}_3\text{OD}$ , 126 MHz)  $\delta$  158.9, 145.3, 142.6, 128.8, 128.1, 126.1, 120.9, 67.5, 67.3 (d,  $J = 5.8$  Hz), 59.4, 41.8, 41.2, 28.7 (d,  $J = 5.8$  Hz), 20.1;  $^{31}\text{P NMR}$  ( $\text{CD}_3\text{OD}$ , 162 MHz)  $\delta$  0.4; ESI-MS  $m/z$  390.1  $[\text{M}-\text{H}]^-$ ; HRMS calcd for  $[\text{C}_{19}\text{H}_{21}\text{NO}_6\text{P}]^-$  requires  $m/z$  390.1106; found 390.1107.

**3-(Trityloxy)propyl dihydrogen phosphate (15):**

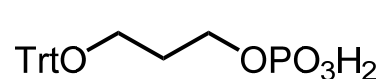 **General procedure S** (19.6 mg, 0.0492 mmol, 49% yield)  
 $^1\text{H NMR}$  ( $\text{CD}_3\text{OD}$ , 500 MHz)  $\delta$  7.30-7.18 (m, 15H), 4.07 (q,  $J = 6.9$  Hz, 2H), 3.67 (t,  $J = 6.3$  Hz, 2H), 1.86 (m, 2H);  $^{13}\text{C NMR}$  ( $\text{CD}_3\text{OD}$ , 126 MHz)  $\delta$  148.8, 129.3, 128.6, 128.0, 83.0, 64.6 (d,  $J = 5.7$  Hz), 59.1, 34.3 (d,  $J = 7.7$  Hz);  $^{31}\text{P NMR}$  ( $\text{CD}_3\text{OD}$ , 162 MHz)  $\delta$  0.3; ESI-MS  $m/z$  397.0  $[\text{M}-\text{H}]^-$ ; HRMS calcd for  $[\text{C}_{22}\text{H}_{22}\text{O}_5\text{P}]^-$  requires  $m/z$  397.1205; found 397.1215.

**((2R,3R,4S,5R,6R)-3,4,5-Tris(benzyloxy)-6-fluorotetrahydro-2H-pyran-2-yl)methyl dihydrogen phosphate (16):**

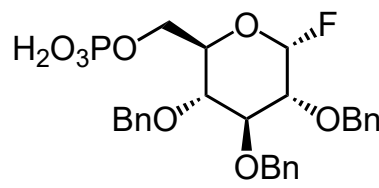 **General procedure A** (19.1 mg, 0.0359 mmol, 72% yield)  
 $^1\text{H NMR}$  ( $\text{CD}_3\text{CN}$ , 400 MHz)  $\delta$  7.36-7.25 (m, 15H), 5.72 (dd,  $J = 54.5$  Hz, 2.3 Hz, 1H), 4.90-4.60 (m, 6H), 4.20-4.11 (m, 2H), 3.90-3.80 (m, 2H), 3.60-3.48 (m, 2H);  $^{13}\text{C NMR}$  ( $\text{CD}_3\text{CN}$ , 101 MHz)  $\delta$  139.6, 139.1, 139.0, 129.3, 129.2, 129.2, 129.0, 128.8, 128.8, 128.7, 128.6, 128.4, 106.2 (d,  $J = 232.2$  Hz), 81.6, 80.3, 80.0, 76.9, 76.0, 75.7, 73.7, 65.8 (d,  $J = 3.9$  Hz);  $^{31}\text{P NMR}$  ( $\text{CD}_3\text{CN}$ , 162 MHz)  $\delta$  0.8; HRMS calcd for  $[\text{C}_{27}\text{H}_{29}\text{FO}_8\text{P}]^-$  requires  $m/z$  531.1584; found 531.1582.

**((2R,3R,4S,5R,6R)-3,4,5-Tris(benzyloxy)-6-(p-tolylthio)tetrahydro-2H-pyran-2-yl)methyl dihydrogen phosphate (17):**

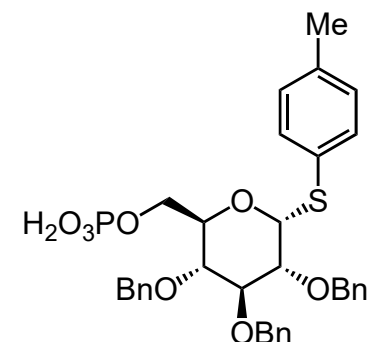 **General procedure A** (49.6 mg, 0.0779 mmol, 78% yield)  
 $^1\text{H NMR}$  ( $\text{CD}_3\text{CN}$ , 500 MHz)  $\delta$  7.43 (d,  $J = 8.0$  Hz, 2H), 7.36-7.22 (m, 15H), 7.13 (d,  $J = 8.0$  Hz, 2H), 4.85-4.57 (m, 7H), 4.23-4.10 (m, 2H), 3.67 (t,  $J = 8.6$  Hz, 1H), 3.50-3.47 (m, 1H), 3.39 (t,  $J = 9.2$  Hz, 2H), 2.28 (s, 3H);  $^{13}\text{C NMR}$  ( $\text{CD}_3\text{CN}$ , 126 MHz)  $\delta$  139.5, 139.3, 139.1, 138.6, 132.5, 131.1, 130.7, 129.2, 129.2, 129.1, 129.0, 128.9, 128.6, 128.5, 128.5, 128.4, 88.2, 86.8, 81.5, 78.1 (d,  $J = 8.4$  Hz), 77.9, 76.0, 75.6, 75.4, 66.3 (d,  $J = 4.8$  Hz), 21.0;  $^{31}\text{P NMR}$

NMR (CD<sub>3</sub>CN, 162 MHz)  $\delta$  0.8; HRMS calcd for [C<sub>34</sub>H<sub>36</sub>O<sub>8</sub>PS]<sup>-</sup> requires  $m/z$  635.1869; found 635.1864.

**((2*R*,3*S*,4*R*)-3,4-Bis(benzyloxy)-3,4-dihydro-2*H*-pyran-2-yl)methyl dihydrogen phosphate (18):**

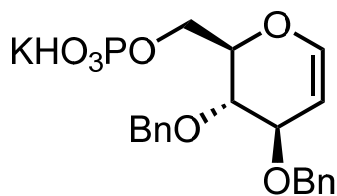

**General procedure B** (20.8 mg, 0.0468 mmol, 47% yield)

When purified this compound, eluent was linear gradient of MeCN in water without TFA.

<sup>1</sup>H NMR (CD<sub>3</sub>OD, 500 MHz)  $\delta$  7.40-7.22 (m, 10H), 6.38 (d,  $J$  = 5.7 Hz, 1H), 4.83-4.70 (m, 3H), 4.64-4.52 (m, 2H), 4.19 (t,  $J$  = 5.2 Hz, 2H), 4.15-4.10 (m, 1H), 4.07 (m, 1H), 3.88 (dd,  $J$  = 8.0 Hz, 6.3 Hz, 1H); <sup>13</sup>C NMR (CD<sub>3</sub>OD, 126 MHz)  $\delta$  145.6, 139.9, 129.4, 129.4, 129.3, 129.2, 129.0, 128.6, 125.3, 100.9, 78.0 (d,  $J$  = 8.4 Hz), 76.4, 75.6, 74.7, 71.3, 64.6 (d,  $J$  = 6.0 Hz); <sup>31</sup>P NMR (CD<sub>3</sub>OD, 162 MHz)  $\delta$  0.9; ESI-MS  $m/z$  405.1 [M-H]<sup>-</sup>; HRMS calcd for [C<sub>20</sub>H<sub>22</sub>O<sub>7</sub>P]<sup>-</sup> requires  $m/z$  405.1103; found 405.1104.

**((2*R*,3*R*,4*S*,5*R*,6*S*)-3,4,5-Tris(benzyloxy)-6-(((2*R*,3*R*,4*S*,5*R*,6*S*)-3,4,5-tris(benzyloxy)-6-methoxytetrahydro-2*H*-pyran-2-yl)methoxy)tetrahydro-2*H*-pyran-2-yl)methyl dihydrogen phosphate (19):**

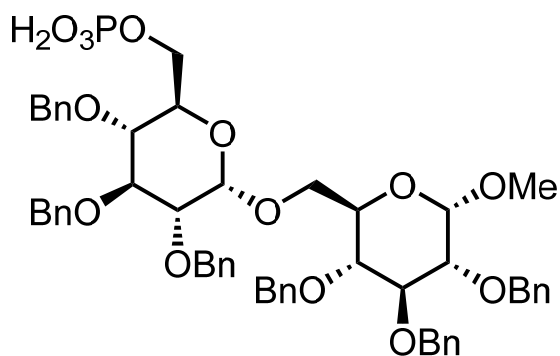

**General procedure A** (38.0 mg, 0.0389 mmol, 78% yield)

<sup>1</sup>H NMR (CD<sub>3</sub>CN, 400 MHz)  $\delta$  7.36-7.16 (m, 30H), 5.07 (d,  $J$  = 3.2 Hz, 1H), 4.89-4.50 (m, 13H), 4.20-4.00 (m, 2H), 3.90-3.60 (m, 8H), 3.50-3.44 (m, 1H) 3.34 (dd,  $J$  = 9.6 Hz, 3.7 Hz, 1H), 3.29 (s, 3H); <sup>13</sup>C NMR (CD<sub>3</sub>CN, 101 MHz)  $\delta$  140.0, 139.8, 139.6, 139.5, 139.5, 139.4, 129.2, 129.2, 129.1, 129.1, 129.1, 128.8, 128.8, 128.7, 128.6, 128.6, 128.6, 128.5, 128.4, 128.4, 128.4, 128.3, 128.3, 128.2, 98.4, 97.5, 82.4, 81.7, 81.1, 81.0, 78.4, 77.9, 75.6 (d,  $J$  = 5.8 Hz), 75.4, 75.3, 73.0, 72.7, 71.0, 70.5, 70.4, 66.7, 66.2 (d,  $J$  = 5.8 Hz), 55.3; <sup>31</sup>P NMR (CD<sub>3</sub>CN, 162 MHz)  $\delta$  0.9; HRMS calcd for [C<sub>55</sub>H<sub>60</sub>O<sub>14</sub>P]<sup>-</sup> requires  $m/z$  975.3721; found 975.3689.

**(8*R*,9*S*,10*R*,13*S*,14*S*,17*S*)-10,13-Dimethyl-3-oxo-2,3,6,7,8,9,10,11,12,13,14,15,16,17-tetradecahydro-1*H*-cyclopenta[*a*]phenanthren-17-yl dihydrogen phosphate (20):**

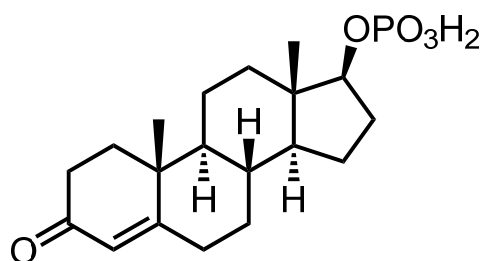

**General procedure A** (24.3 mg, 0.0660 mmol, 66% yield)

$^1\text{H NMR}$  ( $\text{CD}_3\text{OD}$ , 500 MHz)  $\delta$  5.70 (s, 1H), 4.13 (q,  $J = 8.0$  Hz, 1H), 2.53-2.43 (m, 2H), 2.33-2.25 (m, 2H), 2.19-2.10 (m, 1H), 2.08 (dq,  $J = 13.7$  Hz, 2.9 Hz, 1H), 1.95 (dt,  $J = 13.2$  Hz, 3.4 Hz, 1H), 1.92-1.85 (m, 1H), 1.76-1.59 (m, 5H), 1.48 (dq,  $J = 12.6$  Hz, 3.4 Hz, 1H), 1.45-1.34 (m, 1H), 1.24 (s, 3H), 1.17 (dt,  $J = 13.2$  Hz, 4.0 Hz, 1H), 1.08-0.94 (m, 3H), 0.87 (s, 3H);  $^{13}\text{C NMR}$  ( $\text{CD}_3\text{OD}$ , 126 MHz)  $\delta$  202.6, 175.4, 124.1, 86.3, 55.3, 51.1, 44.0, 44.0, 40.0, 37.5, 36.7 (d,  $J = 3.6$  Hz), 34.7, 33.8, 32.7, 29.6, 24.2, 21.6, 17.7, 11.9;  $^{31}\text{P NMR}$  ( $\text{CD}_3\text{OD}$ , 162 MHz)  $\delta$  -0.1; ESI-MS  $m/z$  367.2 [ $\text{M-H}$ ] $^-$ ; HRMS calcd for [ $\text{C}_{19}\text{H}_{28}\text{O}_5\text{P}$ ] $^-$  requires  $m/z$  367.1674; found 367.1680.

***tert*-Butyl *N*-((benzyloxy)carbonyl)-*O*-phosphono-*L*-serinate (21):**

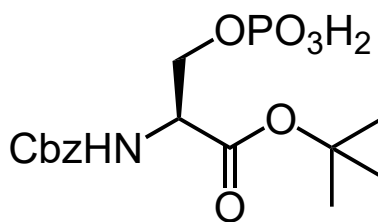

**General procedure S** (29.1 mg, 0.0775 mmol, 77% yield)

$^1\text{H NMR}$  ( $\text{CD}_3\text{OD}$ , 500 MHz)  $\delta$  7.38-7.26 (m, 5H), 5.10 (s, 2H), 4.38-4.34 (m, 1H), 4.30-4.18 (m, 2H), 1.46 (s, 9H);  $^{13}\text{C NMR}$  ( $\text{CD}_3\text{OD}$ , 126 MHz)  $\delta$  169.9, 158.4, 138.1, 129.5, 129.0, 128.9, 83.6, 67.8, 67.3 (d,  $J = 5.8$  Hz), 56.6 (d,  $J = 9.7$  Hz), 28.2;  $^{31}\text{P NMR}$  ( $\text{CD}_3\text{OD}$ , 162 MHz)  $\delta$  -0.2; ESI-MS  $m/z$  374.2 [ $\text{M-H}$ ] $^-$ ; HRMS calcd for [ $\text{C}_{15}\text{H}_{21}\text{NO}_8\text{P}$ ] $^-$  requires  $m/z$  374.1005; found 374.1003.

**Methyl *N*-((benzyloxy)carbonyl)-*O*-phosphono-*L*-allothreoninate (22):**

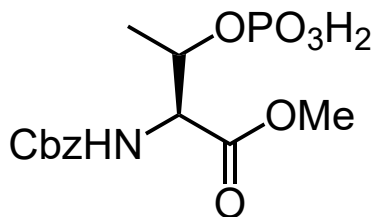

**General procedure A** (27.0 mg, 0.0778mmol, 78% yield)

$^1\text{H NMR}$  ( $\text{CD}_3\text{CN}$ , 400 MHz)  $\delta$  7.40-7.25 (m, 5H), 6.25-6.05 (brs, 1H), 5.09 (s, 2H), 4.90-4.77 (brs, 1H), 4.42-4.30 (brs, 1H), 3.74 (s, 3H), 1.36 (d,  $J = 6.4$  Hz, 3H);  $^{13}\text{C NMR}$  ( $\text{CD}_3\text{OD}$ , 126 MHz)  $\delta$  171.7, 159.1, 138.1, 129.5, 129.1, 128.8, 75.0 (d,  $J = 3.9$  Hz), 67.9, 60.1 (d,  $J = 7.7$  Hz), 53.0, 18.8;  $^{31}\text{P NMR}$  ( $\text{CD}_3\text{OD}$ , 162 MHz)  $\delta$  -1.0; ESI-MS  $m/z$  346.1 [ $\text{M-H}$ ] $^-$ ; HRMS calcd for [ $\text{C}_{13}\text{H}_{17}\text{NO}_8\text{P}$ ] $^-$  requires  $m/z$  346.0692; found 346.0692.

**4-Hydroxyphenethyl dihydrogen phosphate (25):**

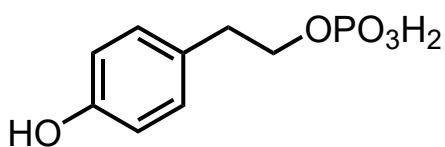

**General procedure A** (12.9 mg, 0.0595 mmol, 60% yield)

$^1\text{H NMR}$  ( $\text{CD}_3\text{OD}$ , 500 MHz)  $\delta$  7.06 (d,  $J = 8.6$  Hz, 2H), 6.70 (d,  $J = 8.6$  Hz, 1H), 4.07 (q,  $J = 7.4$  Hz, 2H), 2.86 (t,  $J = 7.4$  Hz, 2H);  $^{13}\text{C NMR}$  ( $\text{CD}_3\text{OD}$ , 126 MHz)  $\delta$  157.1, 131.0, 129.7, 116.2, 68.7 (d,  $J =$

5.8 Hz), 37.0 (d,  $J = 7.7$  Hz);  $^{31}\text{P}$  NMR ( $\text{CD}_3\text{OD}$ , 162 MHz)  $\delta$  1.1;  $^1\text{H}$ -coupled  $^{31}\text{P}$  NMR ( $\text{DMSO-d}_6$ , 162 MHz)  $\delta$  -1.0 (t,  $J = 7.5$  Hz); ESI-MS  $m/z$  217.1  $[\text{M-H}]^-$ ; HRMS calcd for  $[\text{C}_8\text{H}_{10}\text{O}_5\text{P}]^-$  requires  $m/z$  217.0266; found 217.0265.

**2-((8*S*,9*S*,10*R*,13*S*,14*S*,17*R*)-17-Hydroxy-10,13-dimethyl-3,11-dioxo-2,3,6,7,8,9,10,11,12,13,14,15,16,17-tetradecahydro-1*H*-cyclopenta[*a*]phenanthren-17-yl)-2-oxoethyl dihydrogen phosphate (26):**

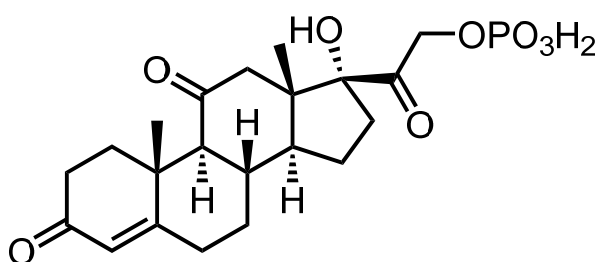

**General procedure C** (19.3 mg, 0.0439 mmol, 88% yield)

$^1\text{H}$  NMR ( $\text{CD}_3\text{OD}$ , 500 MHz)  $\delta$  5.71 (s, 1H), 4.99 (dd,  $J = 18.3$  Hz, 10.3 Hz, 1H), 4.69 (dd,  $J = 18.3$  Hz, 8.0 Hz, 1H), 2.97 (d,  $J = 12.6$  Hz, 1H), 2.75-2.67 (m, 2H), 2.57-2.41 (m, 3H), 2.36-2.29 (m, 1H), 2.23 (dt,  $J = 16.6$  Hz, 3.4 Hz, 1H), 2.11 (dd,  $J = 12.6$  Hz, 6.9 Hz, 2H), 2.06-1.85 (m, 4H), 1.46 (m, 2H), 1.42 (s, 3H), 1.32 (m, 1H), 0.62 (s, 3H);  $^{13}\text{C}$  NMR ( $\text{CD}_3\text{OD}$ , 126 MHz)  $\delta$  212.2, 207.4 (d,  $J = 6.0$  Hz), 202.7, 173.1, 124.7, 89.6, 70.8 (d,  $J = 4.8$  Hz), 63.4, 52.4, 51.3, 50.9, 39.6, 37.8, 35.6, 35.2, 34.4, 33.5, 33.4, 24.0, 17.6, 16.0;  $^{31}\text{P}$  NMR ( $\text{CD}_3\text{OD}$ , 162 MHz)  $\delta$  0.2; ESI-MS  $m/z$  439.1  $[\text{M-H}]^-$ ; HRMS calcd for  $[\text{C}_{21}\text{H}_{28}\text{O}_8\text{P}]^-$  requires  $m/z$  439.1527; found 439.1523.

**2,4,6-Tris(benzyloxy)-3,5-dihydroxycyclohexyl dihydrogen phosphate (27, rac):**

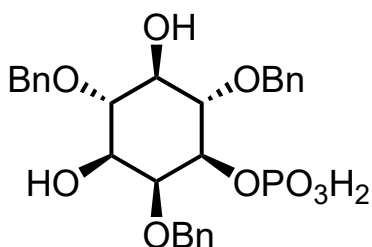

**General procedure A** (24.3 mg, 0.0458 mmol, 46% yield)

$^1\text{H}$  NMR ( $\text{CD}_3\text{OD}$ , 400 MHz)  $\delta$  7.51-7.20 (m, 15H), 4.90-4.73 (m, 6H), 4.25-4.22 (m, 2H), 3.84 (t,  $J = 9.6$  Hz, 1H), 3.67 (t,  $J = 10.1$  Hz, 1H), 3.59 (dd,  $J = 10.1$  Hz, 2.7 Hz, 1H), 3.49 (t,  $J = 9.2$  Hz, 1H);  $^{13}\text{C}$  NMR ( $\text{CD}_3\text{OD}$ , 126 MHz)  $\delta$  140.5, 140.5, 140.2, 129.6, 129.2, 129.2, 129.1, 129.1, 129.0, 128.9, 128.5, 128.4, 83.3, 81.8 (d,  $J = 3.6$  Hz), 81.7, 79.4, 79.3, 76.7, 76.1 (d,  $J = 7.2$  Hz), 76.1 (d,  $J = 6.0$  Hz), 72.9;  $^{31}\text{P}$  NMR ( $\text{CD}_3\text{OD}$ , 162 MHz)  $\delta$  -0.8; ESI-MS  $m/z$  529.2  $[\text{M-H}]^-$ ; HRMS calcd for  $[\text{C}_{27}\text{H}_{30}\text{O}_9\text{P}]^-$  requires  $m/z$  529.1633; found 529.1623.

**2,4,6-Tris(benzyloxy)-5-hydroxycyclohexane-1,3-diyl bis(dihydrogen phosphate)**

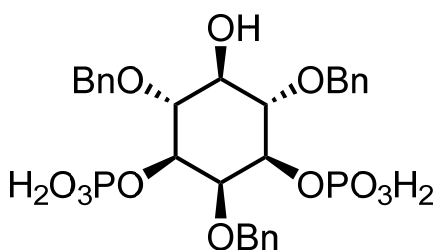

**General procedure A** (5.2 mg, 0.00848 mmol, 8% yield)

$^1\text{H}$  NMR ( $\text{CD}_3\text{OD}$ , 400 MHz)  $\delta$  7.53-7.20 (m, 15H), 4.95-4.74 (m, 6H), 4.55 (t,  $J = 2.7$  Hz, 1H), 4.27 (ddd,  $J = 9.5$  Hz, 8.7 Hz, 2.3 Hz, 2H), 3.83 (t,  $J = 9.5$  Hz, 2H), 3.50 (t,  $J = 9.5$  Hz, 1H);  $^{13}\text{C}$  NMR ( $\text{CD}_3\text{OD}$ , 126 MHz)  $\delta$  140.4, 140.1, 129.5, 129.1, 129.1, 128.8, 128.4, 128.4, 81.5 (d,  $J = 7.2$  Hz), 80.1, 78.5 (d,  $J = 6.0$  Hz), 76.9, 76.2, 75.4;

$^{31}\text{P}$  NMR ( $\text{CD}_3\text{OD}$ , 162 MHz)  $\delta$  -1.0; ESI-MS  $m/z$  609.1  $[\text{M}-\text{H}]^-$ ; HRMS calcd for  $[\text{C}_{27}\text{H}_{31}\text{O}_{12}\text{P}_2]^-$  requires  $m/z$  609.1296; found 609.1294.

**(*S*)-3-(((*S*)-1-(((*S*)-1-Amino-3-(4-hydroxyphenyl)-1-oxopropan-2-yl)amino)-1-oxopropan-2-yl)amino)-2-benzamido-3-oxopropyl dihydrogen phosphate (28):**

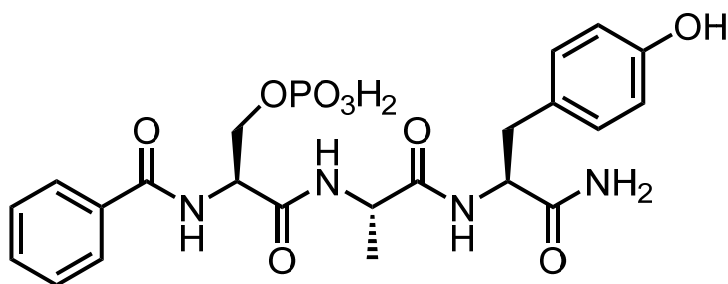

**General procedure D** (14.2 mg, 0.0272 mmol, 75% yield)

$^1\text{H}$  NMR ( $\text{CD}_3\text{OD}$ , 500 MHz)  $\delta$  7.93 (d,  $J$  = 8.0 Hz, 2H), 7.57 (t,  $J$  = 7.4 Hz, 1H), 7.48 (t,  $J$  = 8.0 Hz, 2H), 7.03 (d,  $J$  = 8.6 Hz, 2H), 6.64 (d,  $J$  = 8.6 Hz, 2H), 4.73 (t,  $J$  = 4.9 Hz, 1H), 4.48 (dd,  $J$  = 9.2 Hz, 5.5 Hz, 1H), 4.37

(dd,  $J$  = 8.6 Hz, 4.9 Hz, 2H), 4.24 (q,  $J$  = 7.2 Hz, 1H), 3.12 (dd,  $J$  = 13.7 Hz, 5.5 Hz, 1H), 2.91 (dd,  $J$  = 13.7 Hz, 9.2 Hz, 1H), 1.24 (d,  $J$  = 7.2 Hz, 3H);  $^{31}\text{P}$  NMR ( $\text{CD}_3\text{OD}$ , 162 MHz)  $\delta$  0.7;  $^1\text{H}$ -coupled  $^{31}\text{P}$  NMR ( $\text{DMSO}-d_6$ , 162 MHz)  $\delta$  0.0 (t,  $J$  = 2.5 Hz); ESI-MS  $m/z$  521.2  $[\text{M}-\text{H}]^-$ ; HRMS calcd for  $[\text{C}_{22}\text{H}_{26}\text{N}_4\text{O}_9\text{P}]^-$  requires  $m/z$  521.1433; found 521.1427; Retention time (LC/MS): 7.4 min.

**(2*S*,3*S*)-4-(((*S*)-1-(((*S*)-1-Amino-3-(4-hydroxyphenyl)-1-oxopropan-2-yl)amino)-1-oxopropan-2-yl)amino)-3-benzamido-4-oxobutan-2-yl dihydrogen phosphate (29):**

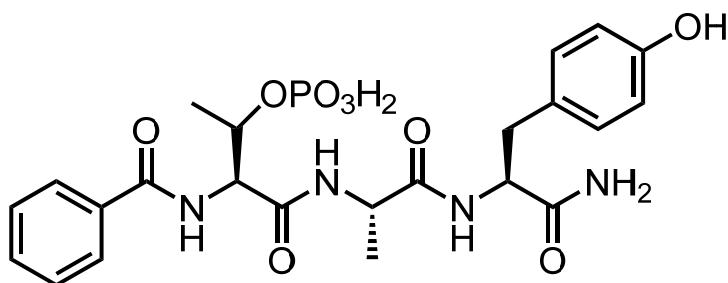

**General procedure C** (4.8 mg, 0.00898 mmol, 57% yield)

$^1\text{H}$  NMR ( $\text{CD}_3\text{OD}$ , 500 MHz)  $\delta$  7.95 (d,  $J$  = 6.9 Hz, 2H), 7.58 (t,  $J$  = 7.4 Hz, 1H), 7.49 (t,  $J$  = 7.4 Hz, 2H), 7.01 (t,  $J$  = 8.6 Hz, 2H), 6.62 (d,  $J$  = 8.6 Hz, 2H), 4.55-4.44 (m, 3H), 4.21 (q,  $J$  = 6.6 Hz, 1H), 3.10 (dd,  $J$  = 14.6

Hz, 6.3 Hz, 1H), 2.92 (dd,  $J$  = 14.6 Hz, 9.7 Hz, 1H), 1.41 (d,  $J$  = 6.6 Hz, 3H), 1.25 (d,  $J$  = 7.4 Hz, 3H);  $^{31}\text{P}$  NMR ( $\text{CD}_3\text{SOCD}_3$ , 162 MHz)  $\delta$  1.2;  $^1\text{H}$ -coupled  $^{31}\text{P}$  NMR ( $\text{DMSO}-d_6$ , 162 MHz)  $\delta$  0.4 (d,  $J$  = 9.8 Hz); ESI-MS  $m/z$  535.2  $[\text{M}-\text{H}]^-$ ; HRMS calcd for  $[\text{C}_{23}\text{H}_{28}\text{N}_4\text{O}_9\text{P}]^-$  requires  $m/z$  535.1599; found 535.1598; Retention time (LC/MS): 6.0 min.

**(S)-4-Amino-3-((S)-2-((S)-2-benzamido-3-(phosphonoxy)propanamido)propanamido)-4-oxobutanoic acid (30):**

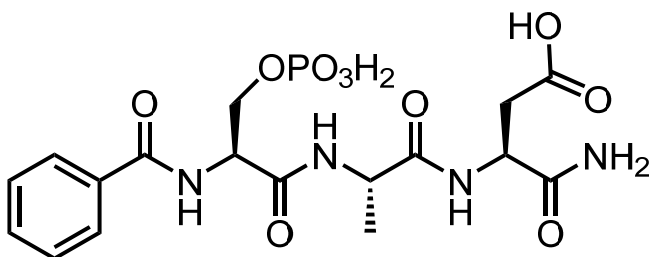

MHz)  $\delta$  0.8; ESI-MS  $m/z$  474.1 [M-H]<sup>-</sup>; HRMS calcd for [C<sub>17</sub>H<sub>22</sub>N<sub>4</sub>O<sub>10</sub>P]<sup>-</sup> requires  $m/z$  473.1079; found 473.1079; Retention time (LC/MS): 5.8 min.

**General procedure C** (7.9 mg, 0.0167 mmol, 71% yield) <sup>1</sup>H NMR (CD<sub>3</sub>OD, 500 MHz)  $\delta$  7.91 (d,  $J$  = 8.6 Hz, 2H), 7.55 (d,  $J$  = 8.0 Hz, 1H), 7.47 (t,  $J$  = 8.0 Hz, 2H), 4.73 (m, 2H), 4.44 (q,  $J$  = 6.6 Hz, 1H), 4.40-4.34 (m, 2H), 2.86-2.81 (m, 2H), 1.39 (d,  $J$  = 6.6 Hz, 3H); <sup>31</sup>P NMR (CD<sub>3</sub>OD, 162

**(S)-3-(((S)-1-(((S)-1-Amino-3-(1H-indol-3-yl)-1-oxopropan-2-yl)amino)-1-oxopropan-2-yl)amino)-2-benzamido-3-oxopropyl dihydrogen phosphate (31):**

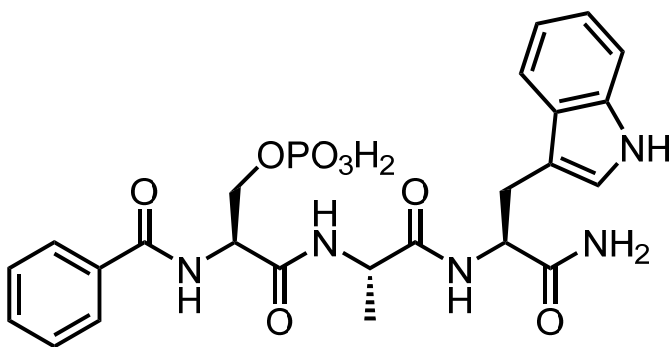

5.2 Hz, 2H), 4.25 (q,  $J$  = 7.2 Hz, 1H), 3.36 (dd,  $J$  = 14.9 Hz, 5.2 Hz, 1H), 3.22 (dd,  $J$  = 14.9 Hz, 8.8 Hz, 1H), 1.21 (d,  $J$  = 7.2 Hz, 3H); <sup>31</sup>P NMR (CD<sub>3</sub>OD, 162 MHz)  $\delta$  0.7; ESI-MS  $m/z$  544.2 [M-H]<sup>-</sup>; HRMS calcd for [C<sub>24</sub>H<sub>27</sub>N<sub>5</sub>O<sub>8</sub>P]<sup>-</sup> requires  $m/z$  544.1603; found 544.1602; Retention time (LC/MS): 6.4 min.

**General procedure C** (8.0 mg, 0.0146 mmol, 76% yield)

<sup>1</sup>H NMR (CD<sub>3</sub>OD, 500 MHz)  $\delta$  7.89 (d,  $J$  = 8.0 Hz, 2H), 7.59 (d,  $J$  = 7.7 Hz, 1H), 7.54 (t,  $J$  = 7.4 Hz, 1H), 7.43 (t,  $J$  = 8.0 Hz, 2H), 7.30 (d,  $J$  = 8.6 Hz, 1H), 7.10-7.04 (m, 2H), 6.97 (t,  $J$  = 7.7 Hz, 1H), 4.72 (t,  $J$  = 5.2 Hz, 1H), 4.64 (dd,  $J$  = 8.8 Hz, 5.2 Hz, 1H), 4.35 (dd,  $J$  = 8.0 Hz,

**(S)-3-(((S)-1-(((S)-1-Amino-4-(methylthio)-1-oxobutan-2-yl)amino)-1-oxopropan-2-yl)amino)-2-benzamido-3-oxopropyl dihydrogen phosphate (32):**

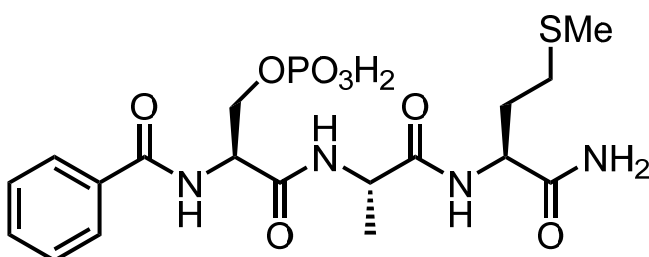

5.2 Hz, 2H), 4.25 (q,  $J$  = 7.2 Hz, 1H), 3.36 (dd,  $J$  = 14.9 Hz, 5.2 Hz, 1H), 3.22 (dd,  $J$  = 14.9 Hz, 8.8 Hz, 1H), 1.21 (d,  $J$  = 7.2 Hz, 3H); <sup>31</sup>P NMR (CD<sub>3</sub>OD, 162 MHz)  $\delta$  0.6; ESI-MS  $m/z$  489.1 [M-H]<sup>-</sup>; HRMS calcd for [C<sub>24</sub>H<sub>27</sub>N<sub>5</sub>O<sub>8</sub>P]<sup>-</sup>

**General procedure D** (14.1 mg, 0.0288 mmol, 81% yield)

<sup>1</sup>H NMR (CD<sub>3</sub>OD, 500 MHz)  $\delta$  7.93 (d,  $J$  = 7.4 Hz, 2H), 7.56 (t,  $J$  = 7.4 Hz, 1H), 7.48 (t,  $J$  = 8.0 Hz, 2H), 4.74 (t,  $J$  = 5.2 Hz, 1H), 4.44 (dd,  $J$  = 9.7 Hz, 4.6 Hz, 1H), 4.38 (dd,  $J$  = 8.0 Hz, 5.2 Hz, 2H),

requires  $m/z$  489.1214; found 489.1206; Retention time (LC/MS): 6.0 min.

**(S)-3-(((S)-1-(((R)-1-Amino-3-(*tert*-butyldisulfanyl)-1-oxopropan-2-yl)amino)-1-oxopropan-2-yl)amino)-2-benzamido-3-oxopropyl dihydrogen phosphate (33):**

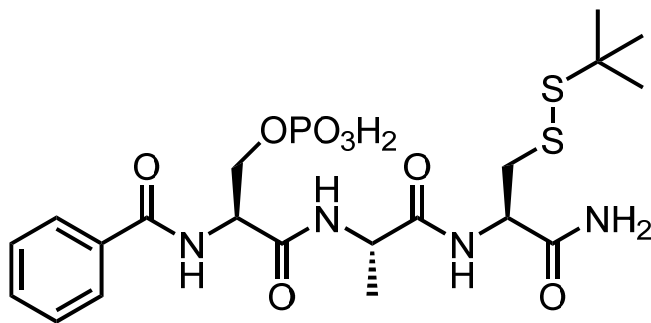

**General procedure C** (12.0 mg, 0.0217 mmol, 77% yield)

$^1\text{H}$  NMR ( $\text{CD}_3\text{OD}$ , 500 MHz)  $\delta$  7.94 (d,  $J = 6.9$  Hz, 2H), 7.57 (t,  $J = 7.4$  Hz, 1H), 7.48 (t,  $J = 7.4$  Hz, 2H), 4.73 (t,  $J = 5.2$  Hz, 1H), 4.57 (dd,  $J = 9.7$  Hz, 5.2 Hz, 1H), 4.39 (dd,  $J = 8.6$  Hz, 5.2 Hz, 2H), 4.32 (q,  $J = 6.9$  Hz, 1H), 3.25 (dd,  $J = 13.7$  Hz,

5.2 Hz, 1H), 3.09 (dd,  $J = 13.7$  Hz, 9.7 Hz, 1H), 1.41 (d,  $J = 6.9$  Hz, 3H), 1.32 (s, 9H);  $^{31}\text{P}$  NMR ( $\text{CD}_3\text{OD}$ , 162 MHz)  $\delta$  0.7; ESI-MS  $m/z$  549.1  $[\text{M}-\text{H}]^-$ ; HRMS calcd for  $[\text{C}_{20}\text{H}_{30}\text{N}_4\text{O}_8\text{PS}_2]^-$  requires  $m/z$  549.1248; found 549.1259; Retention time (LC/MS): 7.1 min.

**4-(((S)-3-Amino-2-(((S)-2-(((S)-2-benzamido-3-(phosphonoxy)propanamido)propanamido)-3-oxopropyl)-1H-imidazol-3-ium trifluoroacetate (34):**

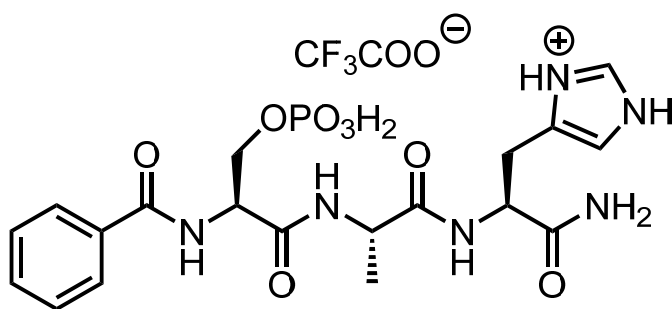

**General procedure C** (9.2 mg, 0.0150 mmol, 85% yield)

$^1\text{H}$  NMR ( $\text{D}_2\text{O}$ , 500 MHz)  $\delta$  8.42 (s, 1H), 7.69 (d,  $J = 7.4$  Hz, 2H), 7.50 (t,  $J = 7.4$  Hz, 1H), 7.39 (t,  $J = 8.0$  Hz, 2H), 7.11 (s, 1H), 4.70-4.50 (m, 2H), 4.21-4.08 (m, 3H), 3.18 (dd,  $J = 15.8$  Hz, 6.3 Hz, 1H), 3.03 (dd,  $J = 15.8$  Hz, 9.7 Hz, 1H),

1.20 (d,  $J = 6.9$  Hz, 3H);  $^{31}\text{P}$  NMR ( $\text{CD}_3\text{OD}$ , 162 MHz)  $\delta$  -0.5; ESI-MS  $m/z$  495.1  $[\text{M}-\text{H}]^-$ ; HRMS calcd for  $[\text{C}_{19}\text{H}_{24}\text{N}_6\text{O}_8\text{P}]^-$  requires  $m/z$  495.1399; found 495.1398; Retention time (LC/MS): 6.3 min.

**(3*S*,6*S*,9*S*)-14-Amino-9-carbamoyl-6-methyl-1,4,7-trioxo-1-phenyl-3-((phosphonoxy)methyl)-2,5,8,13-tetraazatetradecan-14-iminium trifluoroacetate (35):**

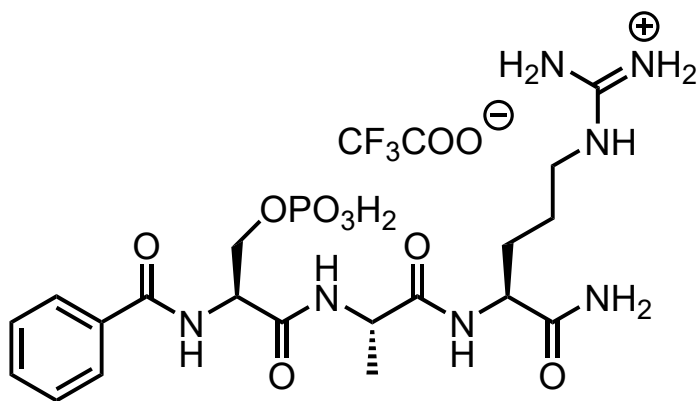

**General procedure C** (6.4 mg, 0.0102 mmol, 76% yield)

<sup>1</sup>H NMR (D<sub>2</sub>O, 500 MHz) δ 7.70 (d, *J* = 7.4 Hz, 2H), 7.49 (t, *J* = 7.4 Hz, 1H), 7.39 (t, *J* = 8.0 Hz, 2H), 4.50 (m, 1H), 4.23 (q, *J* = 7.2 Hz, 1H), 4.17-4.10 (m, 3H), 2.99 (m, 2H), 1.80-1.68 (m, 1H), 1.68-1.58 (m, 1H), 1.54-1.40 (m, 2H), 1.26 (d, *J* = 7.2 Hz, 3H); <sup>31</sup>P NMR (CD<sub>3</sub>OD, 162 MHz) δ 0.3; ESI-MS *m/z* 514.2

[M-H]<sup>-</sup>; HRMS calcd for [C<sub>19</sub>H<sub>29</sub>N<sub>7</sub>O<sub>8</sub>P]<sup>-</sup> requires *m/z* 514.1821; found 514.1811; Retention time (LC/MS): 6.3 min.

**(*S*)-6-Amino-5-((*S*)-2-((*S*)-2-benzamido-3-(phosphonoxy)propanamido)propanamido)-*N*-methyl-6-oxohexan-1-aminium trifluoroacetate (36):**

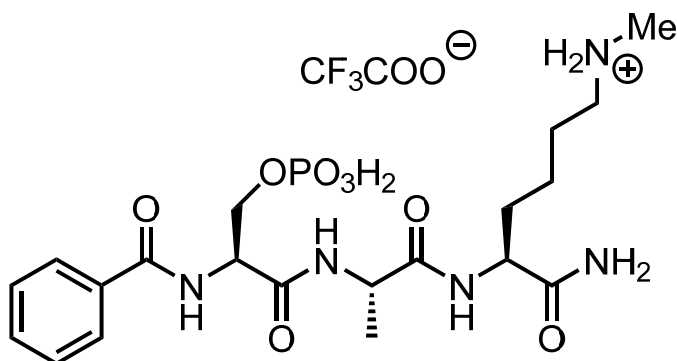

**General procedure C** (3.06 mg, 0.00936 mmol, 22% yield)

<sup>1</sup>H NMR (CD<sub>3</sub>OD, 500 MHz) δ 7.92 (d, *J* = 6.9 Hz, 2H), 7.56 (t, *J* = 7.4 Hz, 1H), 7.48 (t, *J* = 7.4 Hz, 2H), 4.67 (t, *J* = 4.0 Hz, 1H), 4.42 (dd, *J* = 10.3 Hz, 4.0 Hz, 1H), 4.38-4.26 (m, 3H), 3.00-2.90 (m, 2H), 2.63 (s, 3H), 1.92-1.70 (m, 3H), 1.66-1.55 (m, 1H), 1.55-1.34 (m, 2H),

1.42 (d, *J* = 7.4 Hz, 3H); <sup>31</sup>P NMR (CD<sub>3</sub>OD, 162 MHz) δ 1.4; ESI-MS *m/z* 500.2 [M-H]<sup>-</sup>; HRMS calcd for [C<sub>20</sub>H<sub>31</sub>N<sub>5</sub>O<sub>8</sub>P]<sup>-</sup> requires *m/z* 500.1916; found 500.1896; Retention time (LC/MS): 5.7 min.



**(S)-6-Amino-5-((S)-2-((S)-2-benzamido-3-(phosphonoxy)propanamido)propanamido)-N,N-dimethyl-6-oxohexan-1-aminium trifluoroacetate (37):**

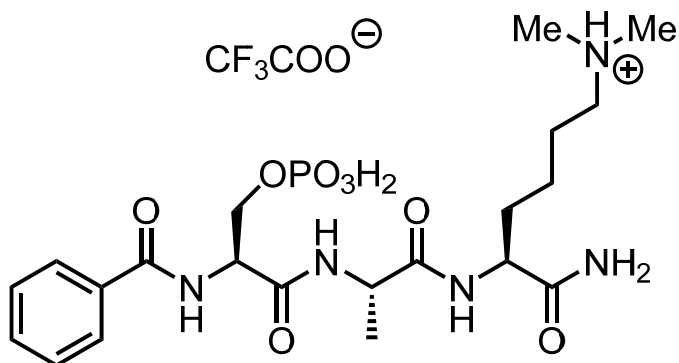

**General procedure C** (15.0 mg, 0.0239 mmol, 56% yield)

<sup>1</sup>H NMR (CD<sub>3</sub>OD, 500 MHz)  $\delta$  7.90 (d,  $J$  = 6.9 Hz, 2H), 7.56 (t,  $J$  = 6.9 Hz, 1H), 7.48 (t,  $J$  = 7.4 Hz, 2H), 4.74 (t,  $J$  = 4.6 Hz, 1H), 4.42-4.32 (m, 4H), 3.14-3.00 (m, 2H), 2.82 (s, 6H), 1.94-1.60 (m, 4H), 1.46 (m, 2H), 1.41 (d,  $J$  = 7.4 Hz, 3H); <sup>31</sup>P NMR (CD<sub>3</sub>OD, 162 MHz)  $\delta$  0.7; ESI-

MS  $m/z$  514.2 [M-H]<sup>-</sup>; HRMS calcd for [C<sub>21</sub>H<sub>33</sub>N<sub>5</sub>O<sub>8</sub>P]<sup>-</sup> requires  $m/z$  514.2072; found 514.2064; Retention time (LC/MS): 5.8 min.

**(6*S*,9*S*,12*S*,15*S*,18*S*,21*S*)-6-Acetamido-1,22-diamino-9-(3-((amino(iminio)methyl)amino)propyl)-18-isopropyl-12,21-dimethyl-7,10,13,16,19,22-hexaoxo-15-((*S*)-1-(phosphonoxy)ethyl)-2,8,11,14,17,20-hexaazadocosan-1-iminium trifluoroacetate (**38**):**

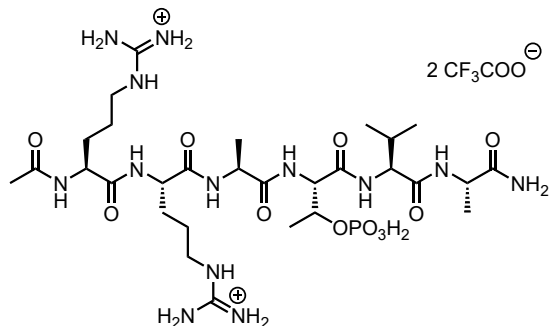

**General procedure D** (4.5 mg, 0.00436 mmol, 54% yield)

The conditions for preparative HPLC were as follows:  
[2% acetonitrile for 3 min, followed by a linear gradient of 2–100% acetonitrile over 60 min. YMC-Triart C18, 230 nm]

ESI-MS  $m/z$  397.8  $[M+2H]^{2+}$ ; HRMS calcd for  $[C_{21}H_{33}N_5O_8P]^-$  requires  $m/z$  792.3887; found 792.3891;

Retention time (LC/MS): 5.5 min.

LC-MS chart of purified **38**

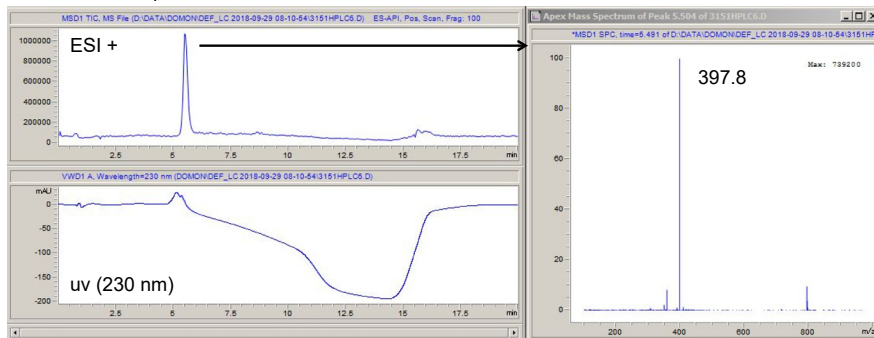

**LC-MS/MS analysis of the phosphorylation position**

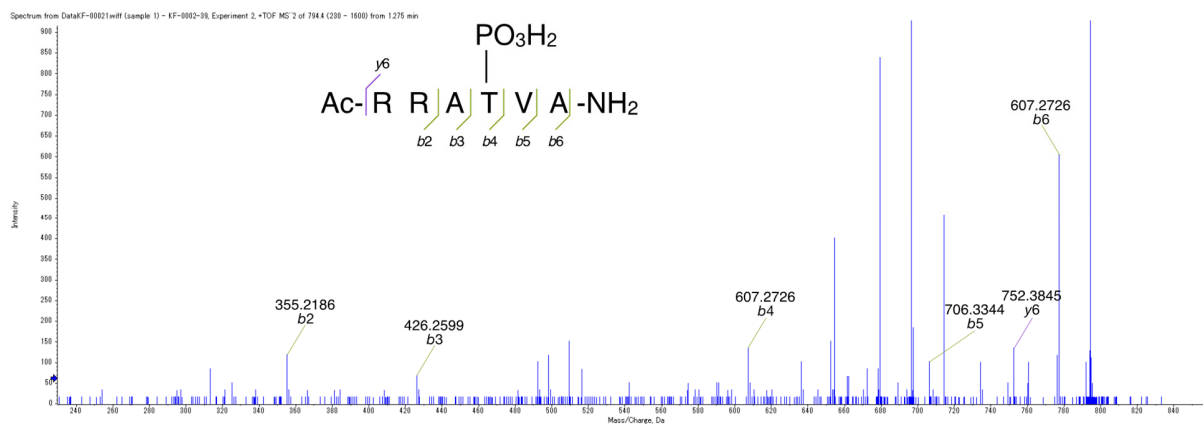

**(6*S*,9*S*,21*S*,24*S*,27*S*,30*S*,33*S*,39*S*,45*S*,48*S*)-1-Amino-30-benzyl-6-carboxy-21,39-bis(2-carboxyethyl)-33,48-bis(carboxymethyl)-27-isobutyl-9-isopropyl-24-methyl-8,11,14,17,20,23,26,29,32,35,38,41,44,47,50-pentadeca-oxo-45-((phosphonoxy)methyl)-2,7,10,13,16,19,22,25,28,31,34,37,40,43,46,49-hexadecaazahenpentacontan-1-iminium trifluoroacetate (39):**

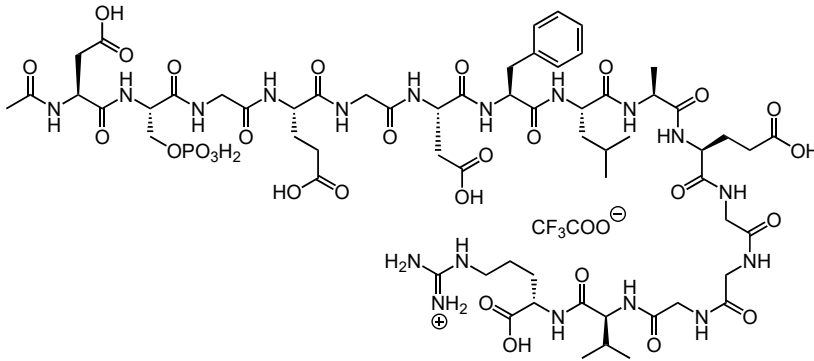

**General procedure E** (2.52 mg, 0.00148 mmol, 59% yield)  
 ESI-MS  $m/z$  792.4  $[M-2H]^{2-}$ ;  
 HRMS calcd for  $[C_{21}H_{33}N_5O_8P]^-$  requires  $m/z$  1585.6177; found 1585.6213; Retention time (LC/MS): 8.3 min.

LC-MS chart of purified **39**

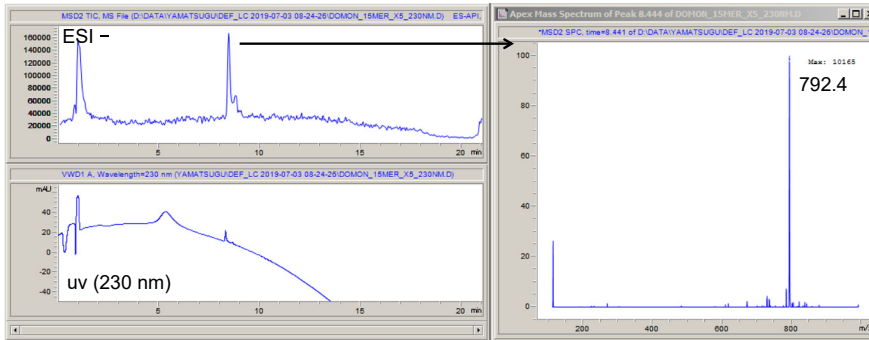

LC-MS/MS analysis of the phosphorylation position

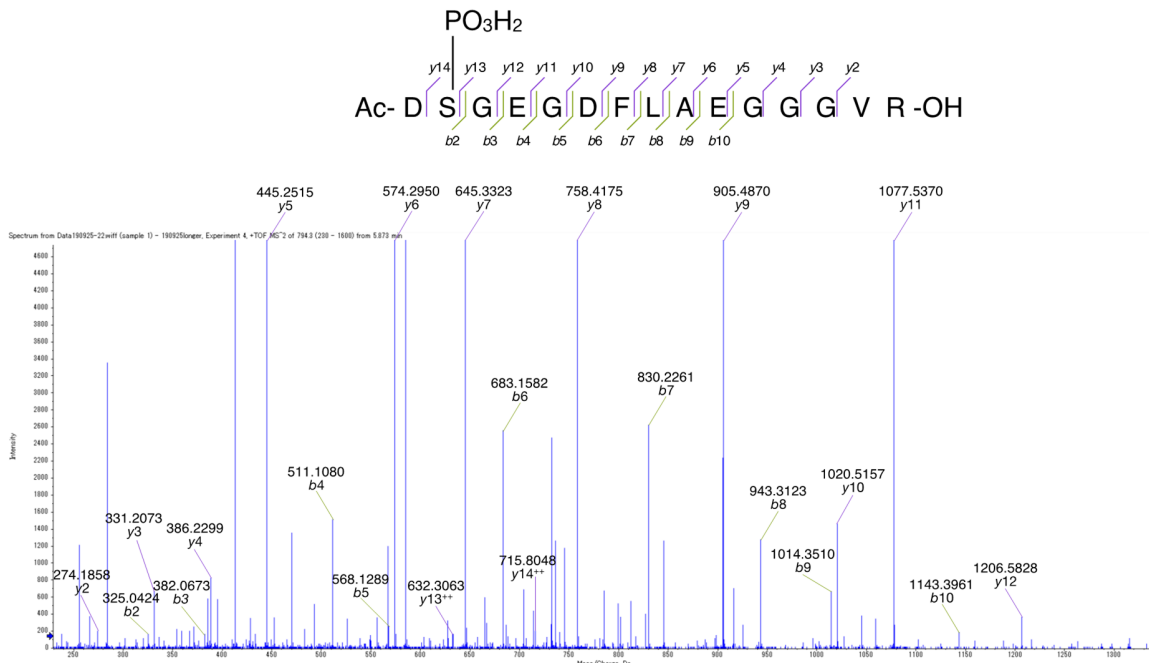

## Computational Details

All the calculations were carried out at the density functional theory (DFT) with the dispersion corrected<sup>1</sup> B3LYP-D3 functional,<sup>2</sup> including the solvation effect by the polarized continuum model (PCM)<sup>3</sup> with a dielectric constant of 37.219 (for DMF). The reaction pathways were searched using an automated reaction path search method, called the artificial force-induced reaction (AFIR) method.<sup>4,5,6</sup> First, the initial orientations between the target molecules were determined randomly, from which the AFIR calculations were applied. At this stage, the basis set (BS1); 6-311G(d,p) for S and P,<sup>7</sup> and 6-31G(d) for others,<sup>8,9</sup> were used. Next, the obtained approximate local minima and transition states were fully reoptimized without any restrictions. The geometry optimization and frequency calculations were carried out using the BS1 basis set. All the transition states were confirmed by the frequency and the intrinsic reaction coordinate (IRC)<sup>10</sup> calculations. The Gibbs free energies were evaluated using the Gibbs free energy correction terms at 373.15 K and 1 atm. These values were further corrected by an adjustment for the 1 atm to 1 M standard-state concentration change of  $RT \ln(24.5 \times 373.15/298.15)$ , 2.54 kcal mol<sup>-1</sup>.<sup>11,12</sup> These free energy contributions were added to the single point electronic energies computed with the diffused basis set (BS2); 6-311+G(d,p) for S and P, and 6-31+G(d,p) for others. The geometry optimizations, frequency calculations, IRC calculations, and AFIR calculations were performed via the global reaction route mapping (GRRM) program,<sup>13</sup> using the energies and energy derivatives computed by the Gaussian09 program.<sup>14</sup>

**Table S1. Complete list of reaction conditions for optimization of the phosphorylation of 3-phenyl-1-propanol (1)**

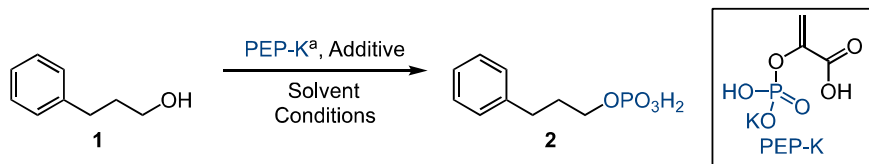

| Entry | PEP-K (equiv.) | Additive                                                  | pK <sub>a1</sub> <sup>b</sup> | Solvent                     | Conditions  | NMR yield |
|-------|----------------|-----------------------------------------------------------|-------------------------------|-----------------------------|-------------|-----------|
| 1     | 1.5            | -                                                         | -                             | MeCN (0.10 M)               | 80 °C, 12 h | 0%        |
| 2     | 1.5            | Tetrazole (20 mol%)                                       | 4.90                          | MeCN (0.10 M)               | 80 °C, 12 h | 0%        |
| 3     | 1.5            | AcOH (20 mol%)                                            | 4.76                          | MeCN (0.10 M)               | 80 °C, 12 h | 0%        |
| 4     | 1.5            | Benzoic acid (20 mol%)                                    | 4.21                          | MeCN (0.10 M)               | 80 °C, 12 h | 0%        |
| 5     | 1.5            | 2-Chlorobenzoic acid (20 mol%)                            | 2.89                          | MeCN (0.10 M)               | 80 °C, 12 h | 0%        |
| 6     | 1.5            | H <sub>3</sub> PO <sub>4</sub> (20 mol%)                  | 2.12                          | MeCN (0.10 M)               | 80 °C, 12 h | 4%        |
| 7     | 1.5            | NBu <sub>4</sub> H <sub>2</sub> SO <sub>4</sub> (20 mol%) | 1.99                          | MeCN (0.10 M)               | 80 °C, 12 h | 35%       |
| 8     | 1.5            | 10-Camphorsulfonic acid (20 mol%)                         | 1.20                          | MeCN (0.10 M)               | 80 °C, 12 h | 6%        |
| 9     | 1.5            | TFA (20 mol%)                                             | -0.25                         | MeCN (0.10 M)               | 80 °C, 12 h | 2%        |
| 10    | 1.5            | TsOH (20 mol%)                                            | -2.80                         | MeCN (0.10 M)               | 80 °C, 12 h | 9%        |
| 11    | 1.5            | NBu <sub>4</sub> BF <sub>4</sub> (20 mol%)                | -                             | MeCN (0.10 M)               | 80 °C, 12 h | 0%        |
| 12    | 1.5            | NBu <sub>4</sub> PF <sub>6</sub> (20 mol%)                | -                             | MeCN (0.10 M)               | 80 °C, 12 h | 0%        |
| 13    | 1.5            | NBu <sub>4</sub> Br (20 mol%)                             | -                             | MeCN (0.10 M)               | 80 °C, 12 h | 0%        |
| 14    | 1.5            | NBu <sub>4</sub> H <sub>2</sub> SO <sub>4</sub> (20 mol%) | 1.99                          | DMSO (0.10 M)               | 80 °C, 12 h | 10%       |
| 15    | 1.5            | NBu <sub>4</sub> H <sub>2</sub> SO <sub>4</sub> (20 mol%) | 1.99                          | NMP (0.10 M)                | 80 °C, 12 h | 9%        |
| 16    | 1.5            | NBu <sub>4</sub> H <sub>2</sub> SO <sub>4</sub> (20 mol%) | 1.99                          | 1,4-Dioxane (0.10 M)        | 80 °C, 12 h | 13%       |
| 17    | 1.5            | NBu <sub>4</sub> H <sub>2</sub> SO <sub>4</sub> (20 mol%) | 1.99                          | Toluene (0.10 M)            | 80 °C, 12 h | 17%       |
| 18    | 1.5            | NBu <sub>4</sub> H <sub>2</sub> SO <sub>4</sub> (20 mol%) | 1.99                          | 1,2-Dichloroethane (0.10 M) | 80 °C, 12 h | 33%       |
| 19    | 1.5            | NBu <sub>4</sub> H <sub>2</sub> SO <sub>4</sub> (20 mol%) | 1.99                          | DMA (0.10 M)                | 80 °C, 12 h | 19%       |
| 20    | 1.5            | NBu <sub>4</sub> H <sub>2</sub> SO <sub>4</sub> (20 mol%) | 1.99                          | DMF (0.10 M)                | 80 °C, 12 h | 43%       |
| 21    | 3.0            | NBu <sub>4</sub> H <sub>2</sub> SO <sub>4</sub> (30 mol%) | 1.99                          | DMF (0.20 M)                | 80 °C, 24 h | 80%       |
| 22    | 3.0            | NaHSO <sub>4</sub> (30 mol%)                              | 1.99                          | DMF (0.20 M)                | 80 °C, 24 h | 38%       |
| 23    | 3.0            | KHSO <sub>4</sub> (30 mol%)                               | 1.99                          | DMF (0.20 M)                | 80 °C, 24 h | 33%       |
| 24    | 3.0            | NMe <sub>4</sub> H <sub>2</sub> SO <sub>4</sub> (30 mol%) | 1.99                          | DMF (0.20 M)                | 80 °C, 24 h | 49%       |
| 25    | 3.0            | NOct <sub>3</sub> MeHSO <sub>4</sub> (30 mol%)            | 1.99                          | DMF (0.20 M)                | 80 °C, 24 h | 51%       |
| 26    | 3.0            | PBu <sub>4</sub> H <sub>2</sub> SO <sub>4</sub> (30 mol%) | 1.99                          | DMF (0.20 M)                | 80 °C, 24 h | 45%       |
| 27    | 4.5            | NBu <sub>4</sub> H <sub>2</sub> SO <sub>4</sub> (30 mol%) | 1.99                          | DMF (0.20 M)                | 100 °C, 6 h | 88%       |

<sup>a</sup>The value of pK<sub>a1</sub> of PEP-H is less than 2. <sup>b</sup>Values in water.

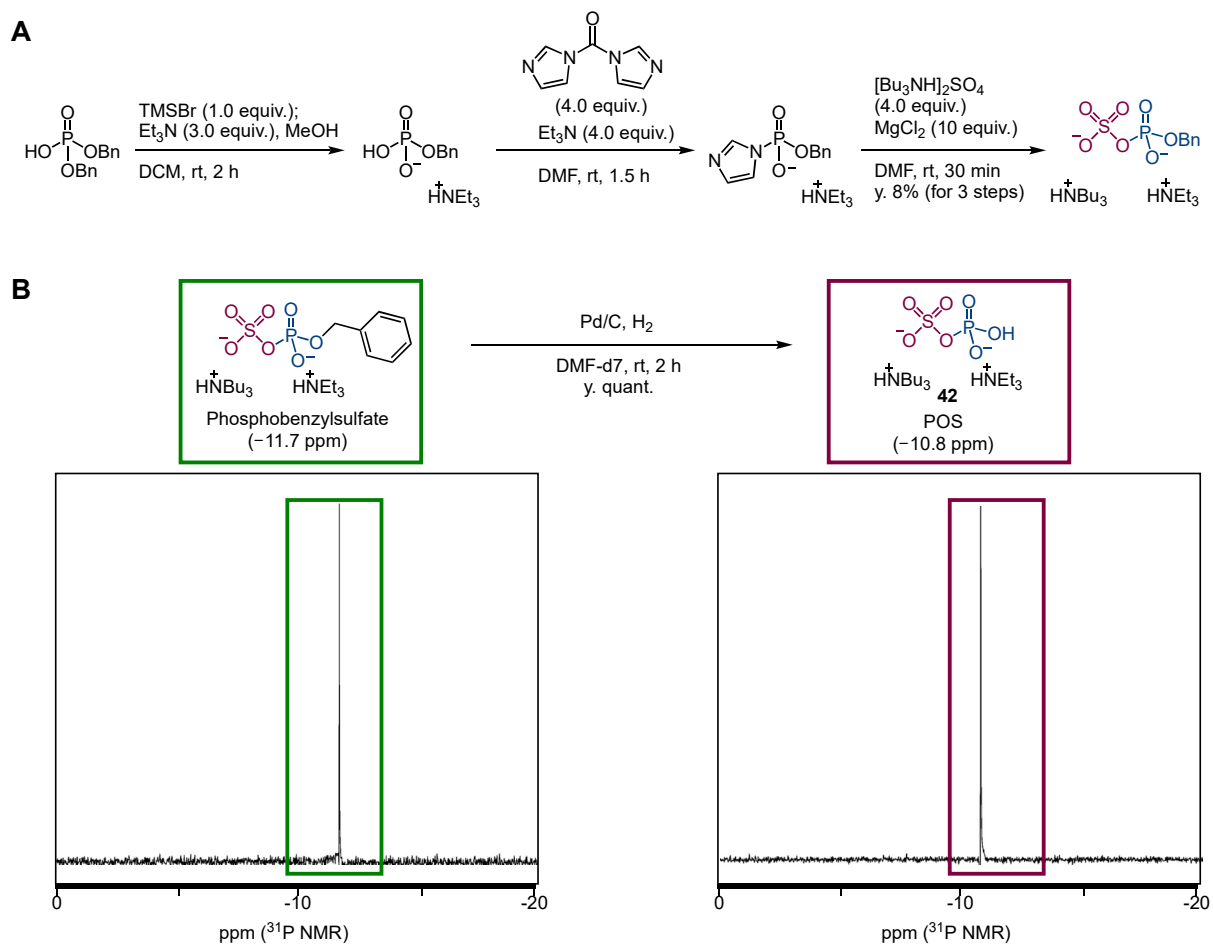

**Figure S1. Synthesis of *O*-benzyl phosphosulfate (A) and  $^{31}\text{P}$  NMR change in hydrogenolysis of *O*-benzyl phosphosulfate to prepare POS (42) (B).**

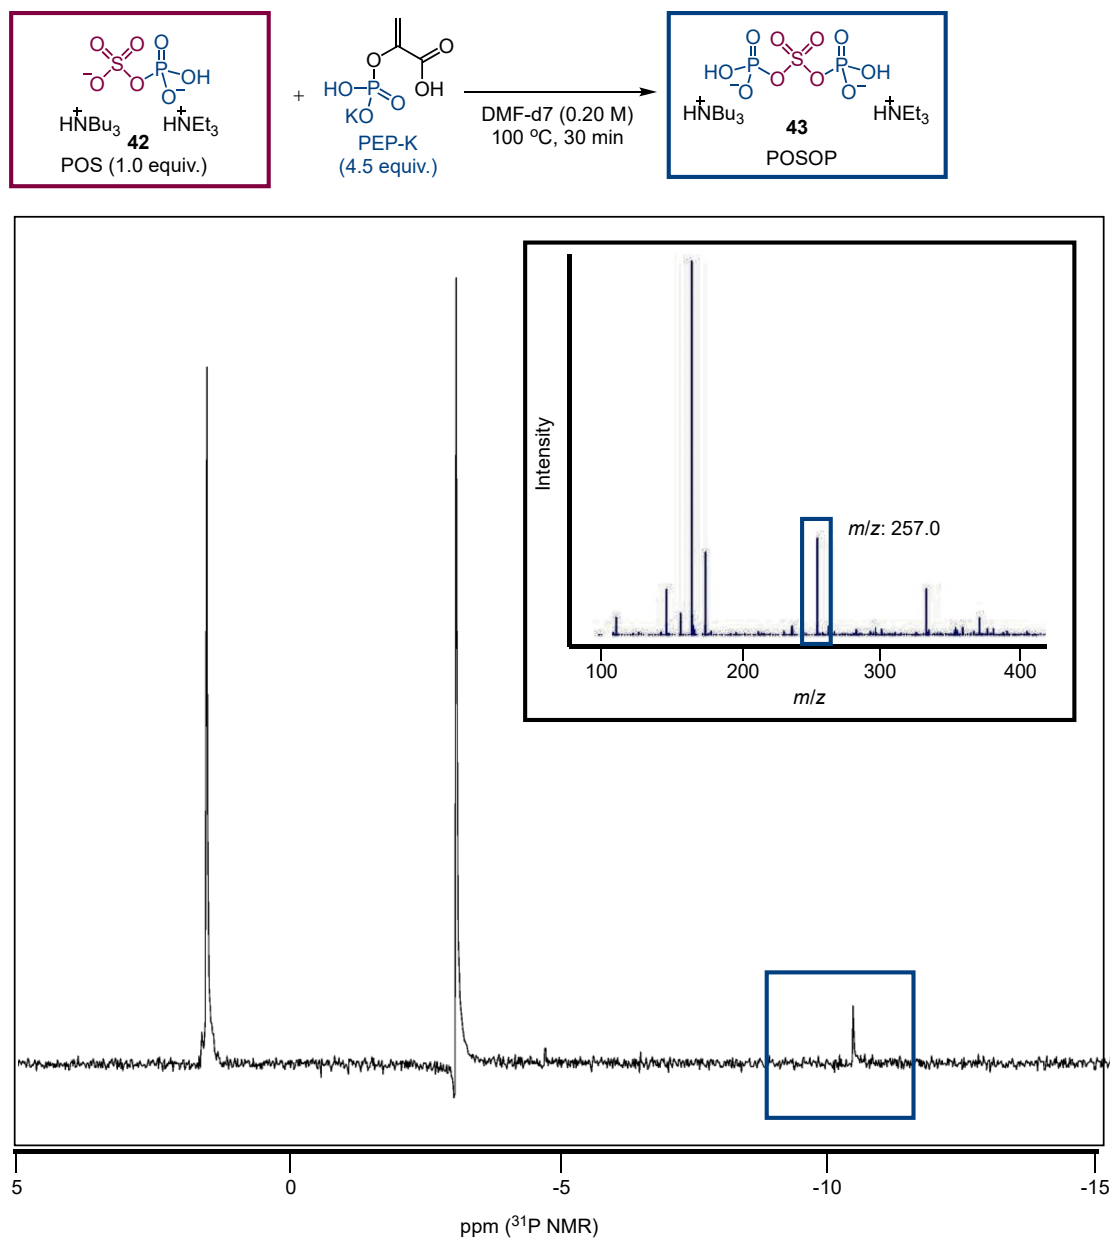

**Figure S2.** A  $^{31}\text{P}$  NMR spectrum and a MS spectrum (inset) after the reaction between POS (42) and PEP-K at 100 °C for 30 min. A peak at 1.5 ppm is phosphoric acid and a peak at -3.0 ppm is PEP-K. A peak at -10.2 ppm is considered to be POSOP (43). The MS spectrum showed a peak of  $m/z$  257.0 corresponding to POSOP (43).

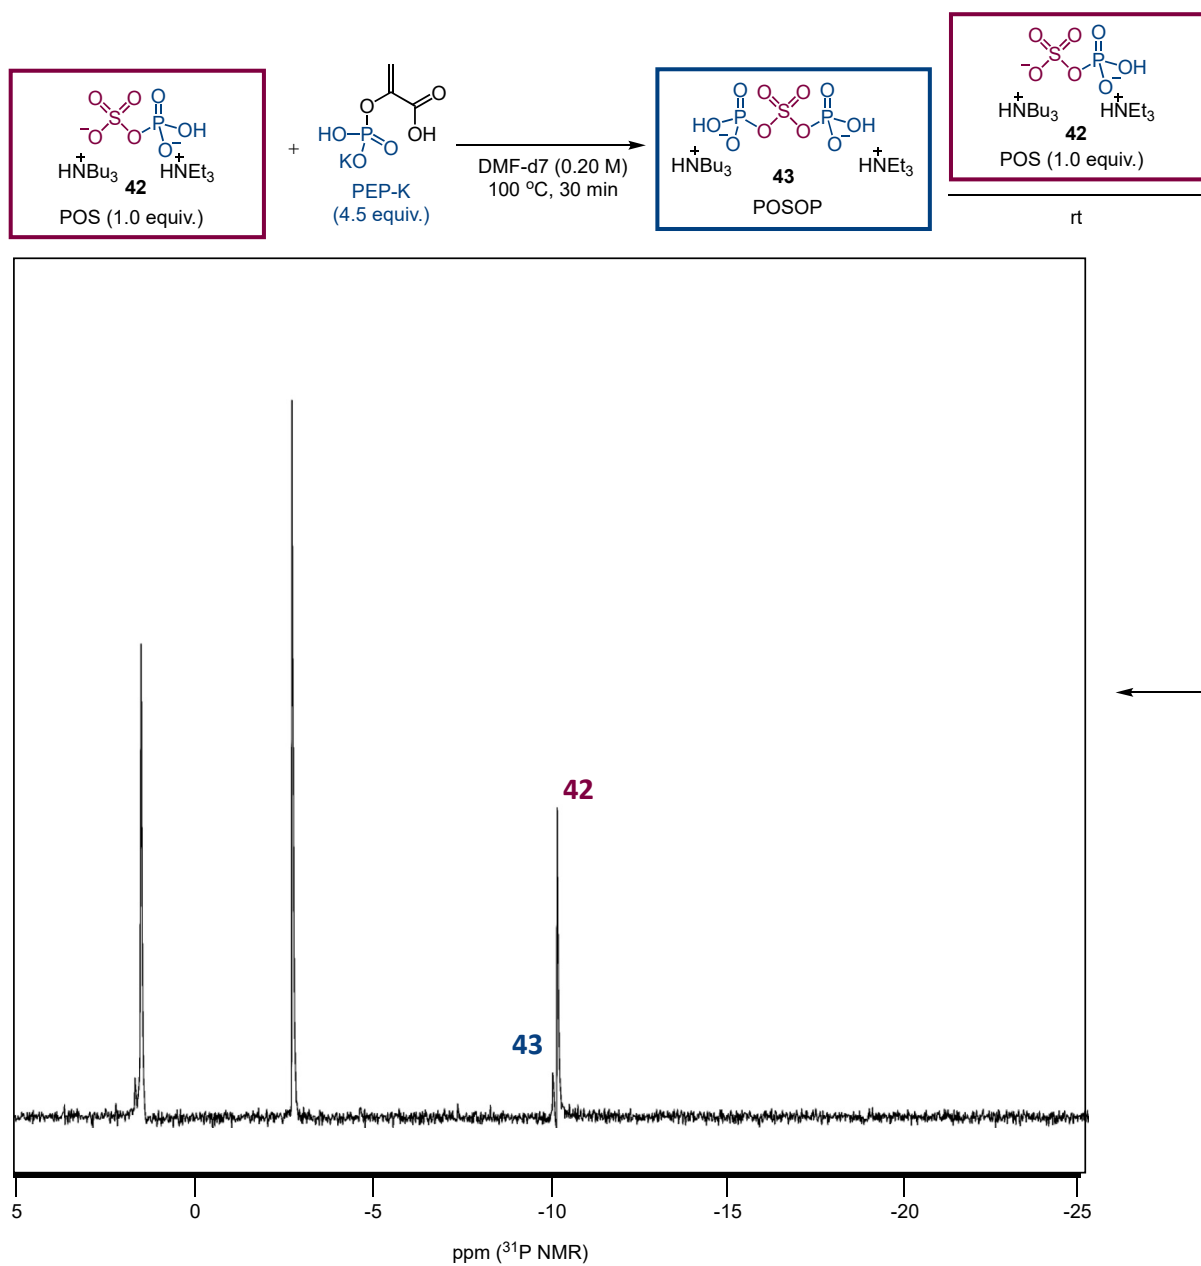

**Figure S3.** A  $^{31}\text{P}$  NMR spectrum just after the further addition of POS (42) to the reaction mixture obtained in Fig. S2. In addition to the peak of POSOP (43) at  $-10.0$  ppm, a new peak corresponding to POS (42) appeared at  $-10.1$  ppm.



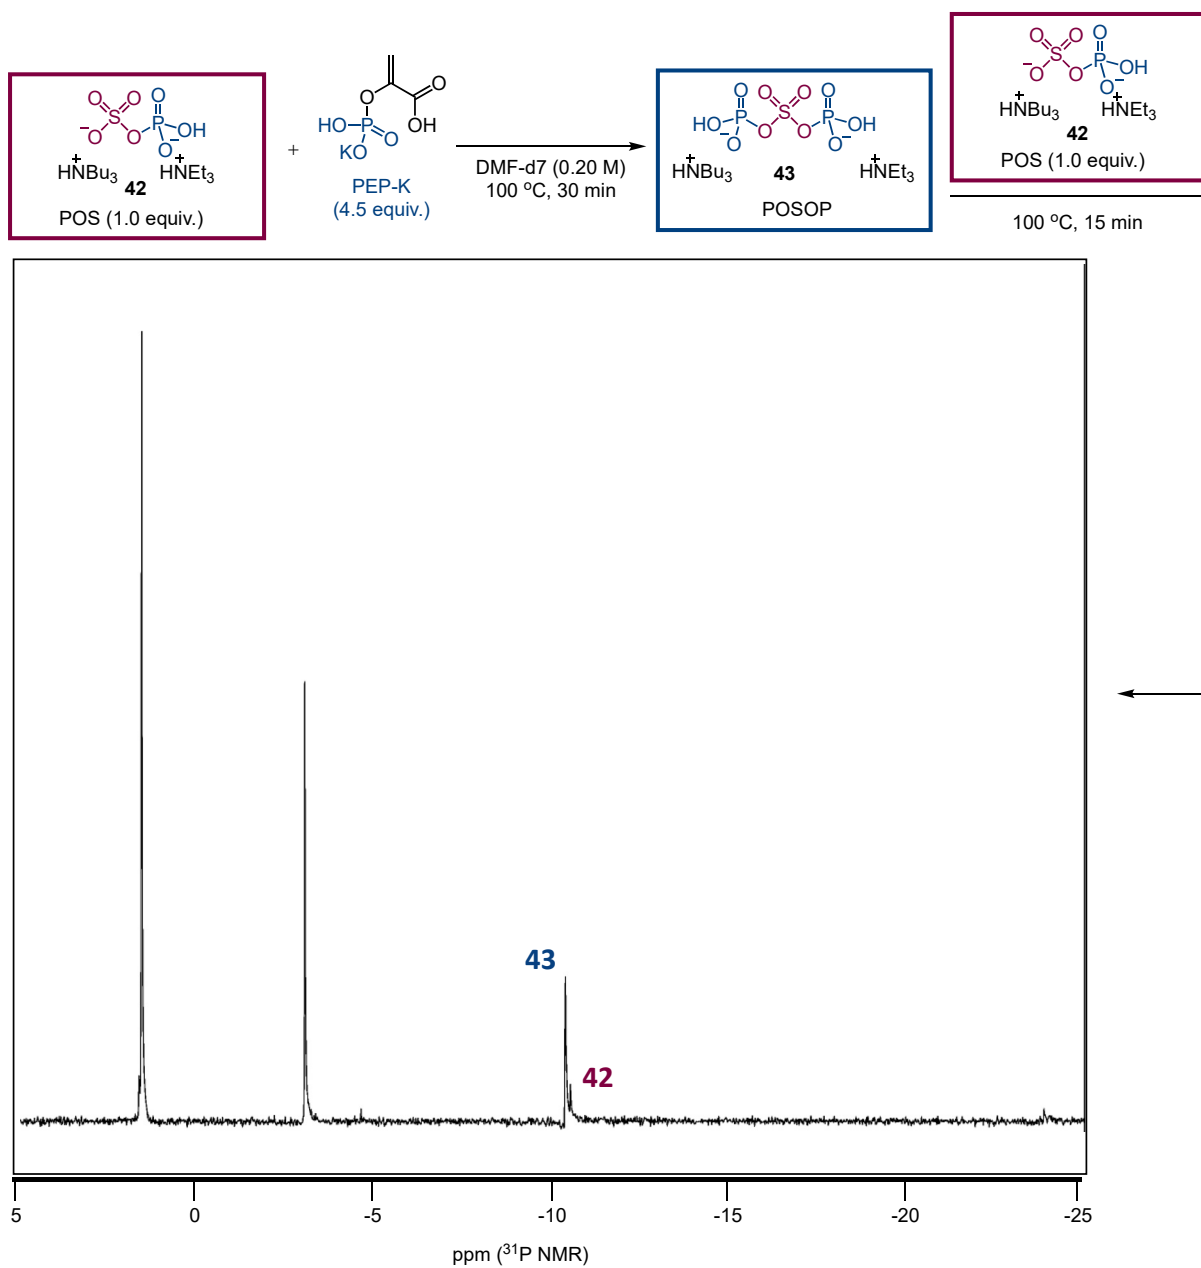

**Figure S4.** A  $^{31}\text{P}$  NMR spectrum after heating the reaction mixture obtained in Fig. S3 at 100 °C for 15 min. The peak at -10.5 ppm corresponding to POS (42) decreased and the peak at -10.4 ppm corresponding to POSOP (43) increased.

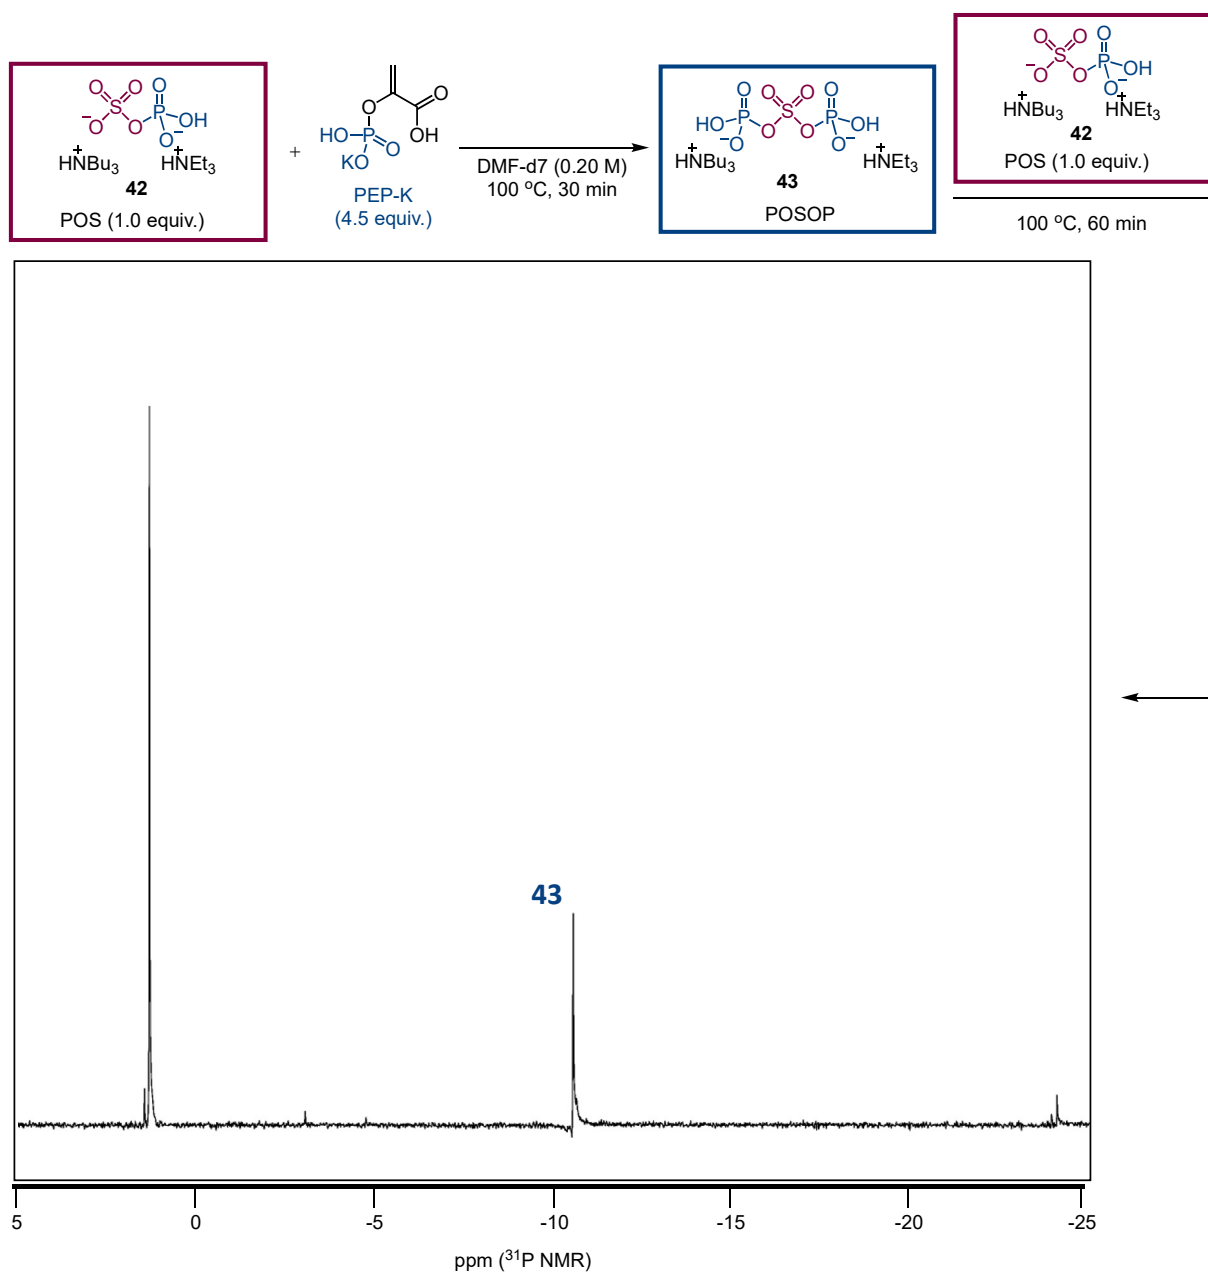

**Figure S5.** A  $^{31}\text{P}$  NMR spectrum after heating the reaction mixture obtained in Fig. S4 at 100 °C for additional 45 min (total 60 min after Figure S3). The peak corresponding POS (42) disappeared completely. The experiments in Figures S2-S5 showed that peaks of POS (42) and POSOP (43) appeared in very close chemical shifts, but those are different.

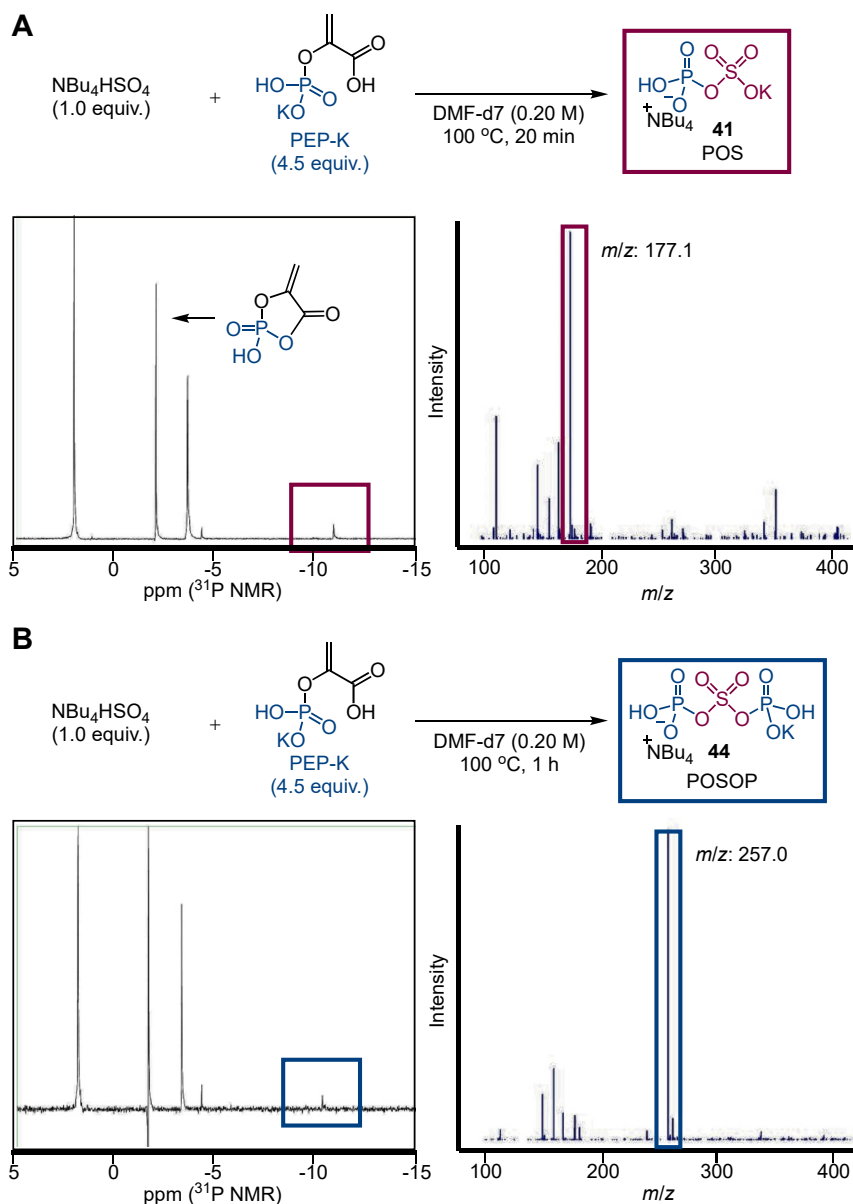

**Figure S6.**  $^3\text{P}$  NMR (left) and MS (right) spectra of the reaction between TBAHS and PEP-K. (A) After 20 min. A peak at 1.6 ppm is phosphoric acid. A peak at -2.4 ppm matched with that of the cyclic acyl phosphate generated from PEP cyclohexylammonium salt and  $N,N'$ -dicyclohexylcarbodiimide.<sup>15</sup> A peak at -4.8 ppm is PEP-K. A peak at -11.4 ppm is considered to be POS (**41**). The MS spectrum showed a peak of  $m/z$  177.1 corresponding to POS (**41**). (B) After 1 h. A peak at -10.8 ppm is considered to be POSOP (**44**). The MS spectrum showed a peak of  $m/z$  257.0 corresponding to POSOP (**44**).

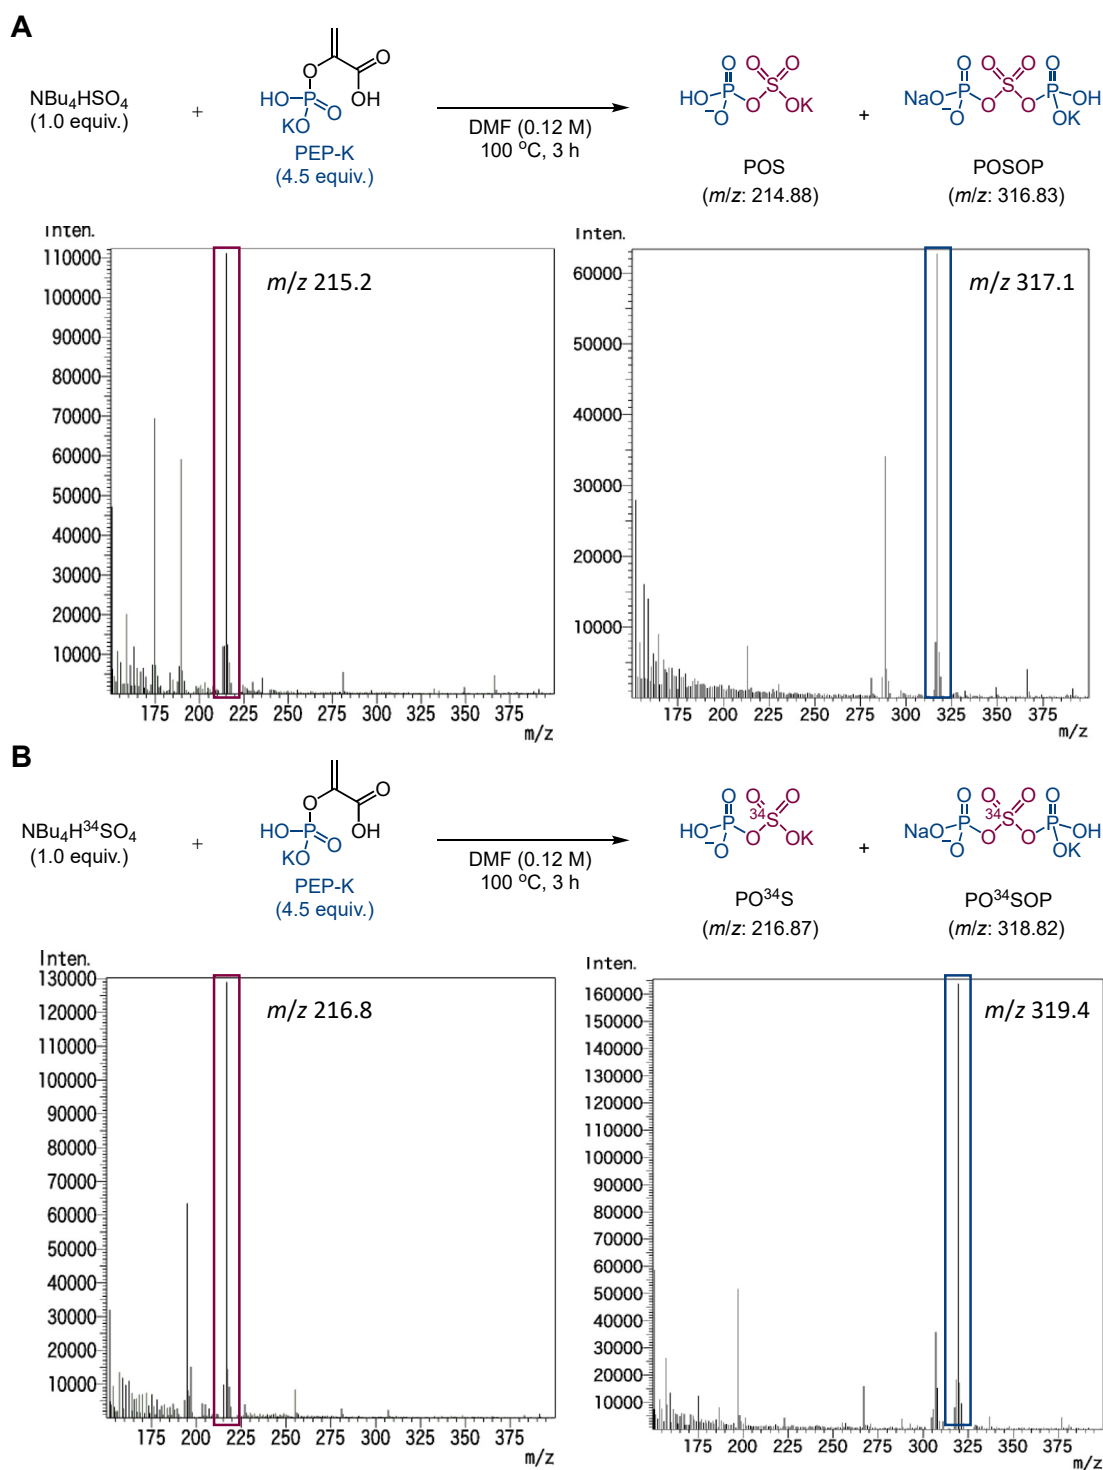

**Figure S7. MS analyses of POS and POSOS using  $^{34}\text{S}$ -labeled TBAHS.** MS charts of the reaction using  $^{32}\text{S}$ -TBAHS (A) and  $^{34}\text{S}$ -TBAHS (B). The reaction mixtures were analyzed by LC-MS using an isocratic elution of acetonitrile over 3 min with a flow rate of 1 mL/min.

### Detailed Gibbs free energy profiles and geometries

In Figures S8–S14, compounds with the same number of atoms are connected with solid lines. Dot lines are used to connect compounds with different number of atoms.

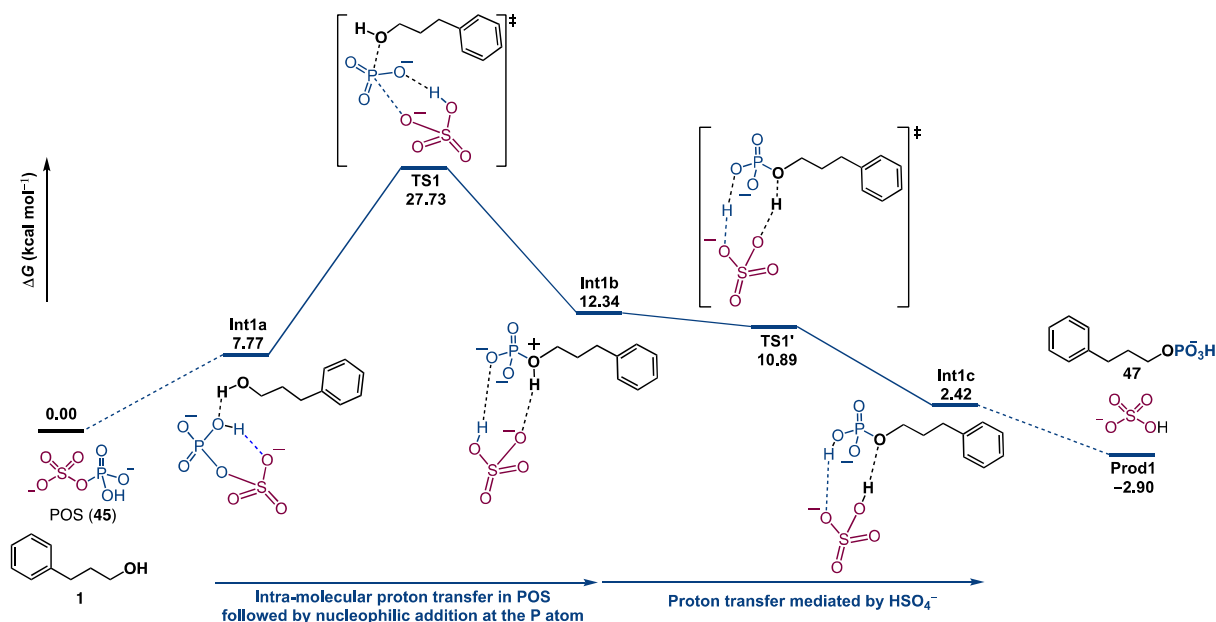

**Figure S8.** Gibbs free energy profile (in  $\text{kcal mol}^{-1}$ ) of phosphorylation of alcohol (ROH) by POS. The reference of the relative Gibbs free energy ( $\Delta G = 0.0$ ) is ROH 1 + POS 45. Intramolecular proton transfer from the phosphate moiety to the sulfate moiety in POS 45 occurs prior to TS1, followed by nucleophilic addition at the P atom (Int1a–Int1b). Then, the proton in ROH migrates to the phosphate moiety through the mediation by the eliminated  $\text{HSO}_4^-$  group (Int1b–Int1c).

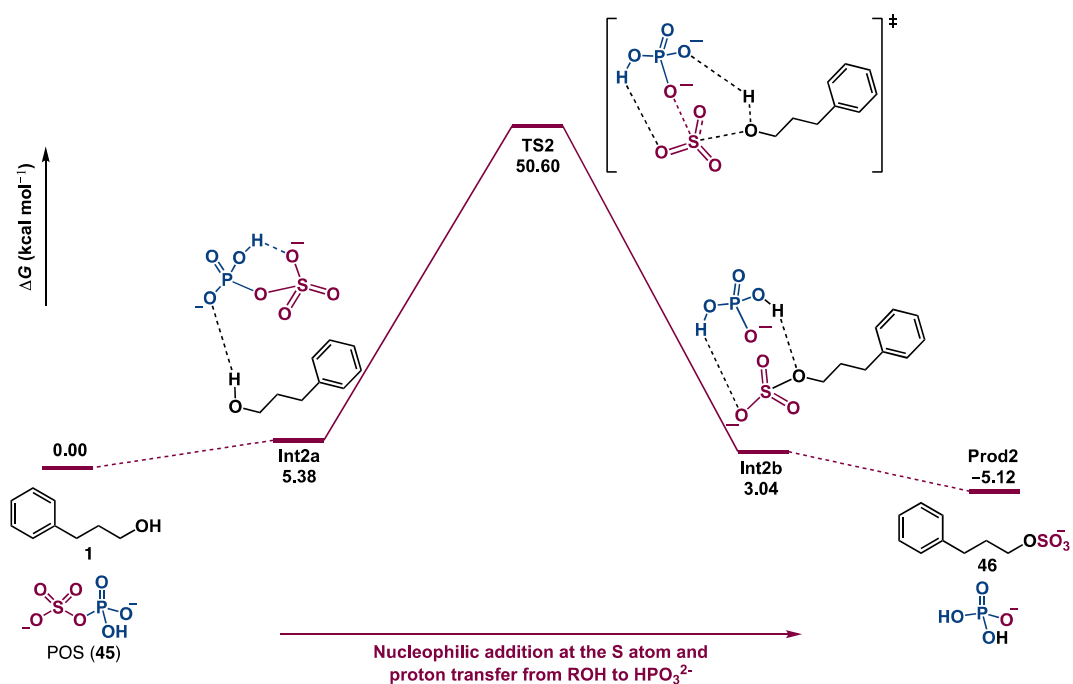

**Figure S9.** Gibbs free energy profile (in kcal mol<sup>-1</sup>) of sulfation of alcohol (ROH) by POS. The reference of the relative Gibbs free energy ( $\Delta G = 0.0$ ) is ROH **1** + POS **45**. Nucleophilic addition at the S atom and proton transfer from ROH to the phosphate moiety proceed concertedly (**Int2a**–**Int2b**).

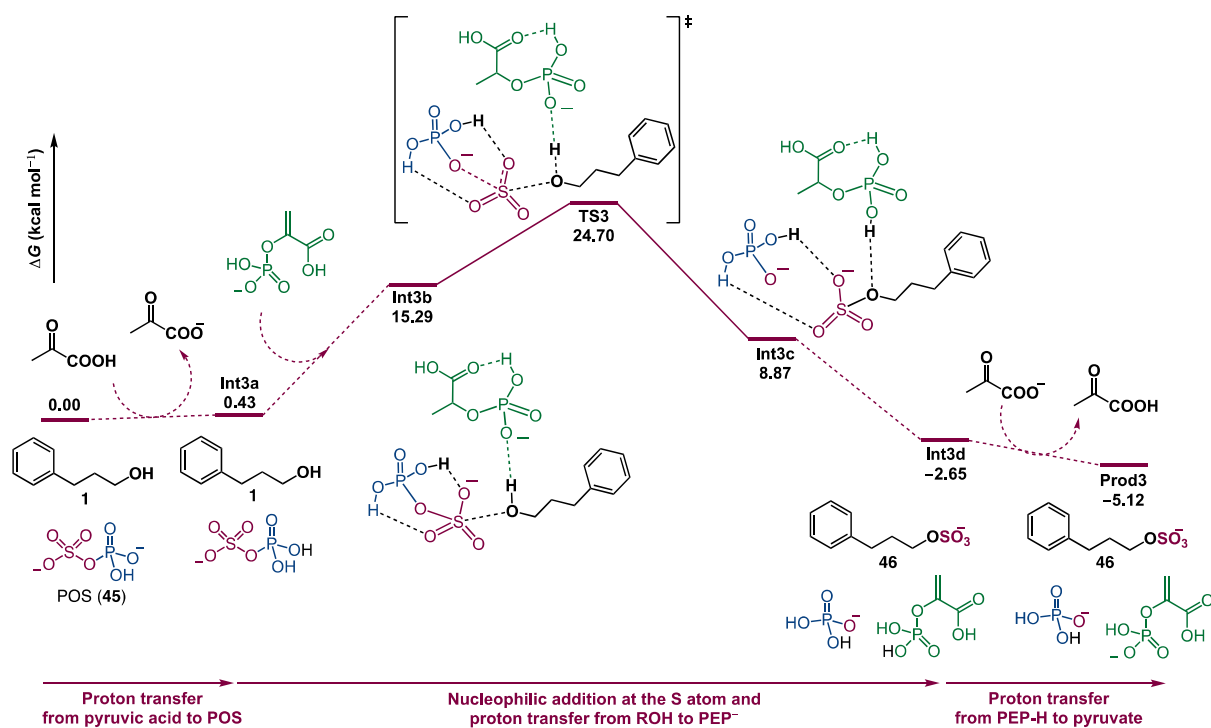

**Figure S10.** Gibbs free energy profile (in  $\text{kcal mol}^{-1}$ ) of sulfation of alcohol (ROH) by POS mediated by PEP-H. The reference of the relative Gibbs free energy ( $\Delta G = 0.0$ ) is ROH **1** + POS **45** + pyruvic acid + PEP<sup>-</sup>. POS **45** abstracts the proton from pyruvic acid prior to **Int3a**, then nucleophilic addition at the S atom and proton transfer from ROH to PEP<sup>-</sup> occur concertedly (**Int3b–Int3c**). Finally, the proton transfers from PEP-H to pyruvate (**Int3d–Prod3**).

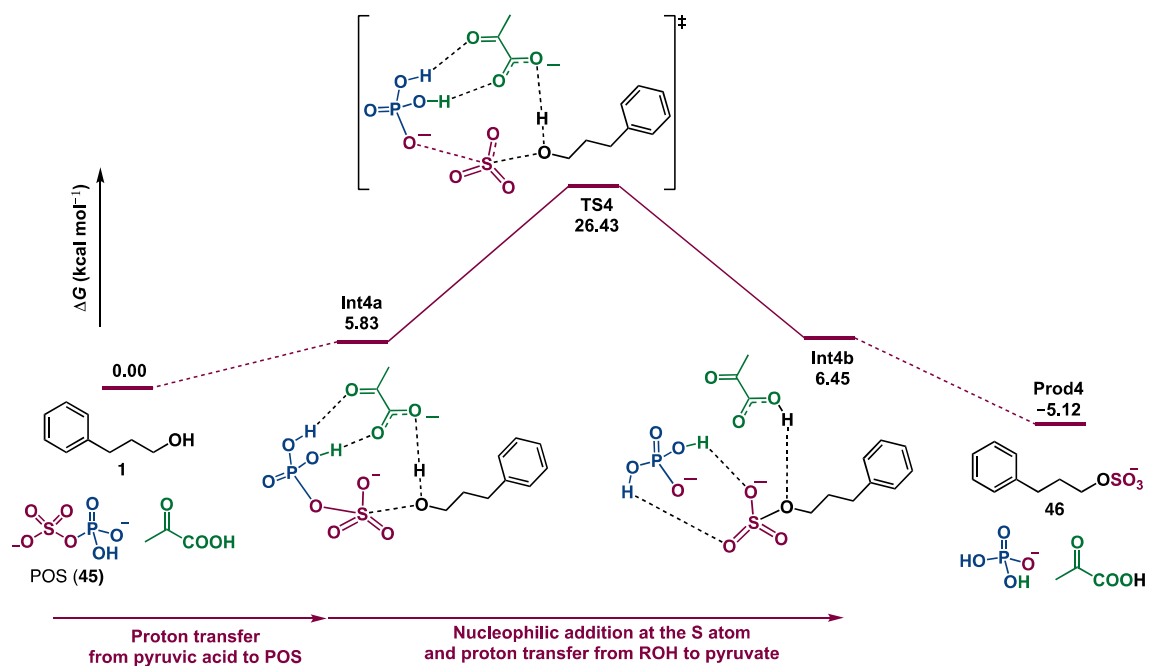

**Figure S11.** Gibbs free energy profile (in  $\text{kcal mol}^{-1}$ ) of sulfation of alcohol (ROH) by POS mediated by pyruvic acid. The reference of the relative Gibbs free energy ( $\Delta G = 0.0$ ) is ROH **1** + POS **45** + pyruvic acid. Proton transfer from pyruvic acid to POS **45** occurs prior to **Int4a**, followed by nucleophilic addition at the S atom and proton transfer from ROH to pyruvate (**Int4a**–**Int4b**).



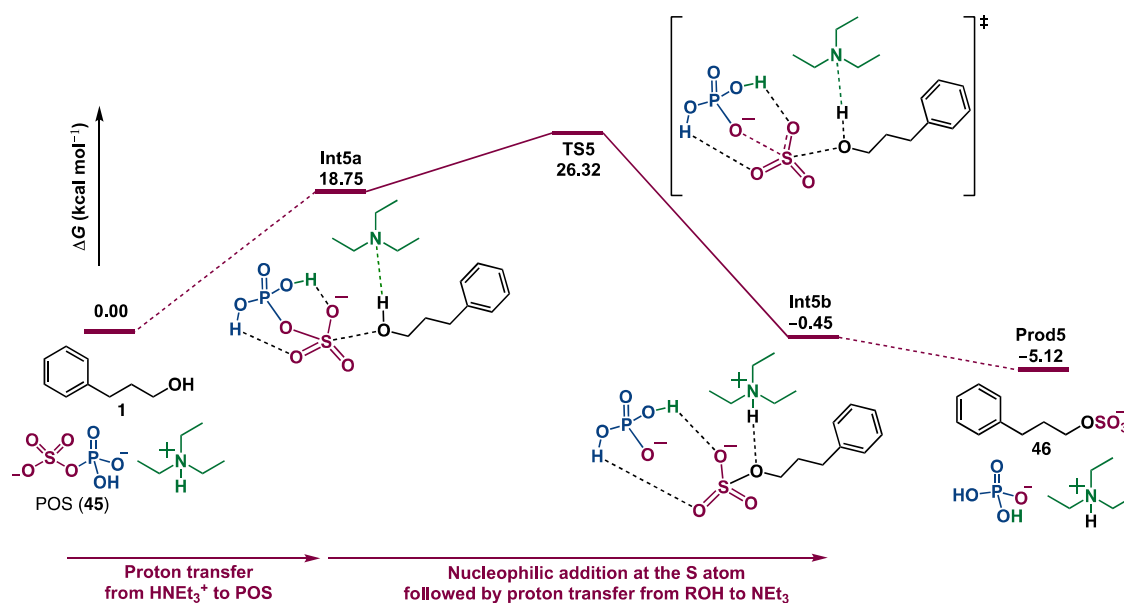

**Figure S12.** Gibbs free energy profile (in kcal mol<sup>-1</sup>) of sulfation of alcohol (ROH) by POS mediated by HNEt<sub>3</sub><sup>+</sup>. The reference of the relative Gibbs free energy ( $\Delta G = 0.0$ ) is ROH **1** + POS **45** + HNEt<sub>3</sub><sup>+</sup>. Proton transfer from HNEt<sub>3</sub><sup>+</sup> to POS **45** proceeds prior to **Int5a**, followed by nucleophilic addition at the S atom and proton transfer from ROH to NEt<sub>3</sub> (**Int5a–Int5b**).

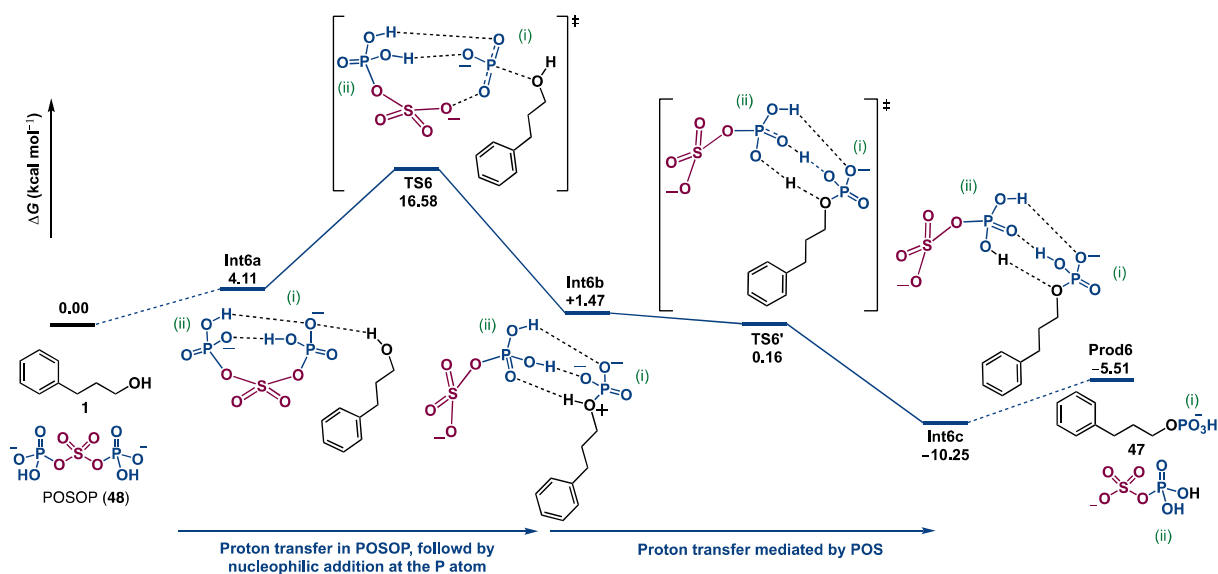

**Figure S13. Gibbs free energy profile (in kcal mol<sup>-1</sup>) of phosphorylation of alcohol by POSOP.** The reference of the relative Gibbs free energy ( $\Delta G = 0.0$ ) is ROH **1** + POSOP **48**. Intramolecular proton transfer from the phosphate moiety (i) to the other phosphate moiety (ii) in POSOP **48** takes place prior to **TS6**, followed by nucleophilic addition of ROH at the P atom (**Int6a**–**Int6b**). Then, proton transfer from ROH to the phosphate moiety (ii) and that from (ii) to (i) take place concertedly (**Int6b**–**Int6c**). Namely, the leaving protonated POS mediates the proton transfer from ROH to the phosphate moiety (i).

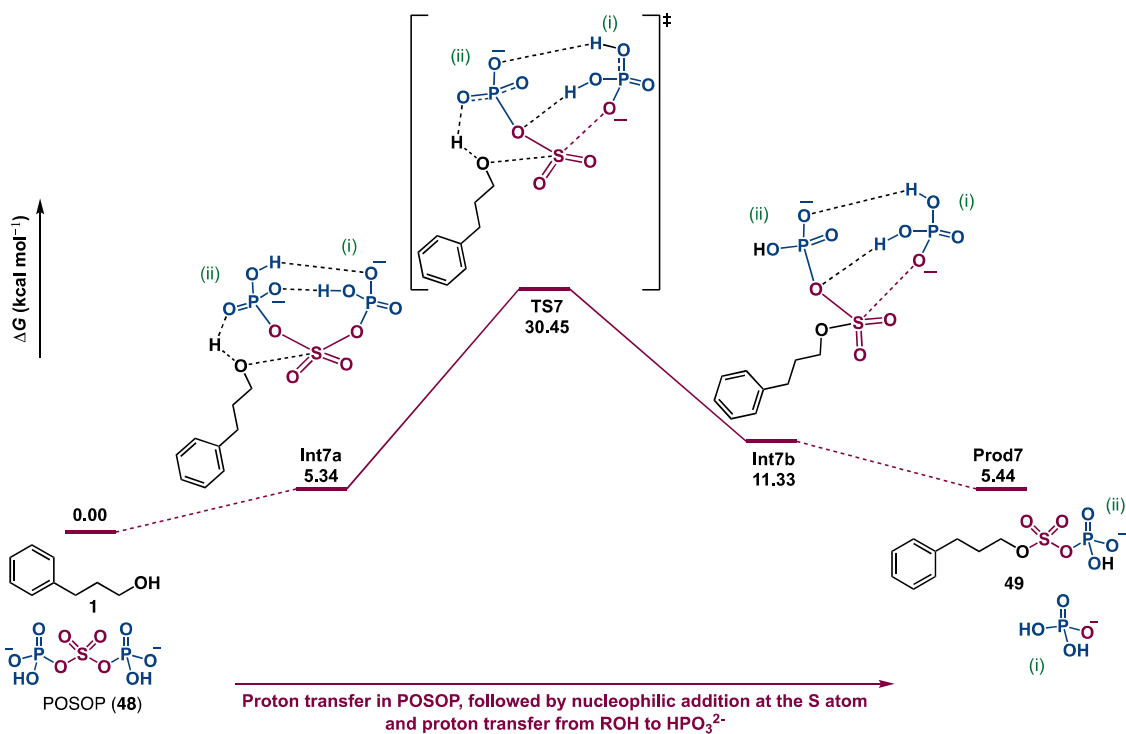

**Figure S14. Gibbs free energy profile (in kcal mol<sup>-1</sup>) of sulfation of alcohol (ROH) by POSOP.** The reference of the relative Gibbs free energy ( $\Delta G = 0.0$ ) is ROH **1** + POSOP **48**. The leaving phosphate moiety (i) abstracts a proton from the other phosphate moiety (ii) in POSOP (**48**) (prior to TS7). Then, the nucleophilic addition of ROH at the S atom and the proton transfer from ROH to the phosphate moiety (ii) proceed concertedly (**Int7a–Int7b**). Namely, the phosphate moiety (ii) mediates the proton transfer from ROH to the leaving phosphate (i).

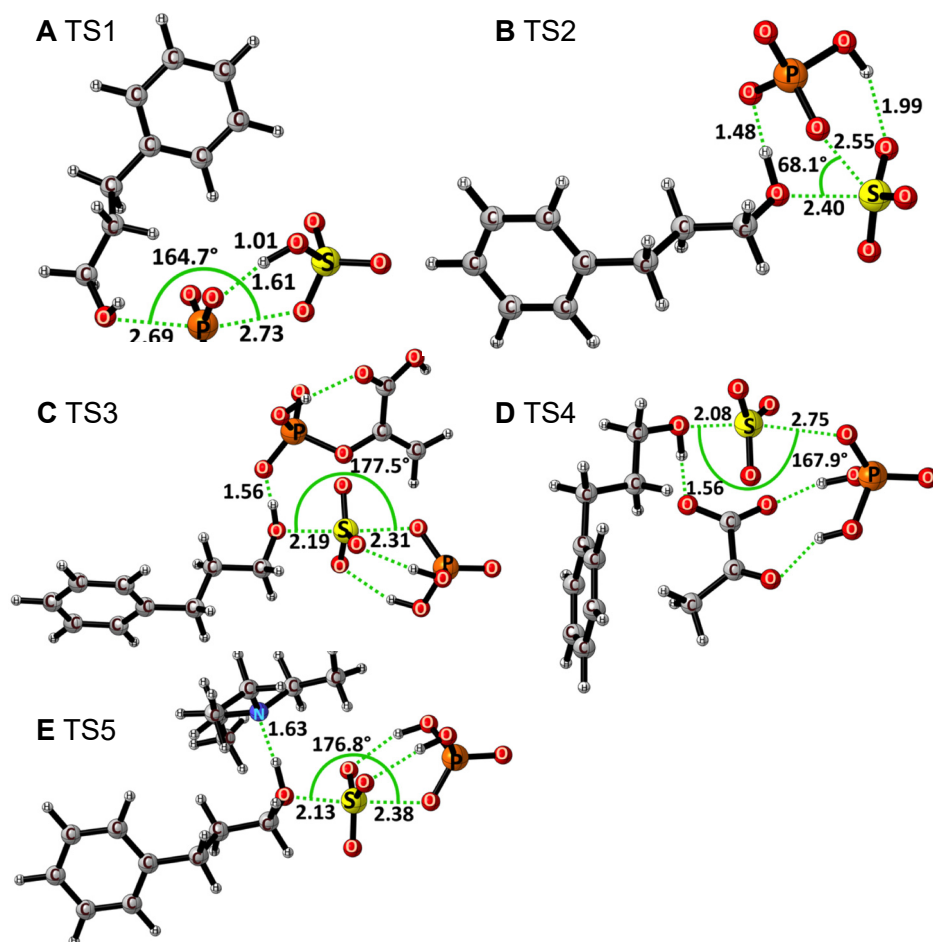

**Figure S15. Geometries of TSs for phosphorylation and sulfation by POS.** Geometries of TSs for phosphorylation by POS (A), sulfation by POS without proton-transfer mediators (B), with pyruvic acid (C), with PEP (D), and with  $\text{HNEt}_3^+$  (E) are shown, respectively. The bond distances are in Å. The Gibbs free energy differences are shown in Figures S8-S12.

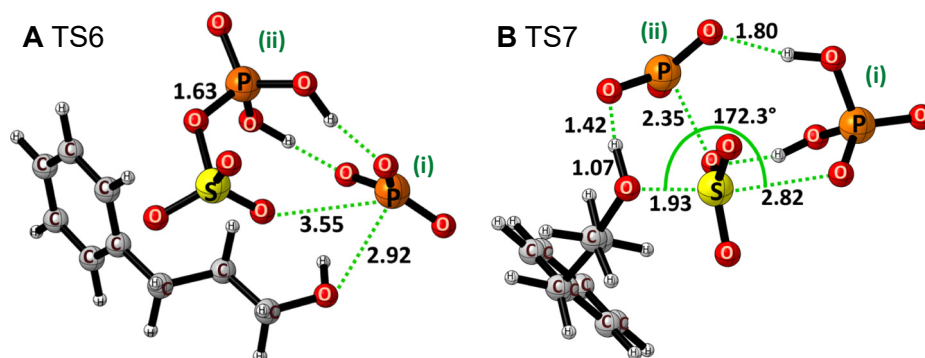

**Figure S16. Geometries of the TSs for phosphorylation (A) and sulfation (B) by POSOP.** Phosphorylation is shown in **A**, and sulfation is shown in **B**. The bond distances are in Å. The Gibbs free energy differences are shown in Figures S13-S14. (i) and (ii) are the same labels as shown in Figures S13 and S14.

**Table S2. Bond orders/distances (in Å) of POS 45 and POSOP 48.**

|          | POS 45                                  | POSOP 48                                |
|----------|-----------------------------------------|-----------------------------------------|
| P–O bond | 0.56 <sup>a)</sup> / 1.71 <sup>b)</sup> | 0.48 <sup>a)</sup> / 1.77 <sup>b)</sup> |
| S–O bond | 0.67 <sup>a)</sup> / 1.66 <sup>b)</sup> | 0.79 <sup>a)</sup> / 1.59 <sup>b)</sup> |

<sup>a,b)</sup>The corresponding O–P and O–S bonds are shown in red below.

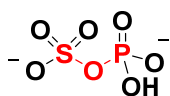

POS

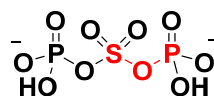

POSOP

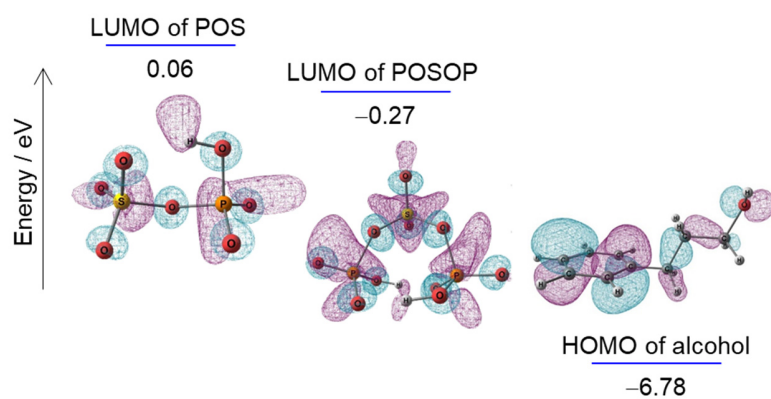

**Figure S17. The frontier orbitals and their energy levels (in eV) of POS 45, POSOP 48, and 3-phenyl-1-propanol (1).**

## References

1. Grimme, S.; Antony, J.; Ehrlich, S.; Krieg, H. A consistent and accurate ab initio parametrization of density functional dispersion correction (DFT-D) for the 94 elements H-Pu. *J. Chem. Phys.* **2010**, *132*, 154104.
2. Lee, C.; Yang, W.; Parr, R. G. Development of the Colle-Salvetti correlation-energy formula into a functional of the electron density. *Phys. Rev. B* **1988**, *37*, 785-789.
3. Tomasi, J.; Mennucci, B.; Cammi, R. Quantum Mechanical Continuum Solvation Models. *Chem. Rev.* **2005**, *105*, 2999-3094.
4. Maeda, S.; Harabuchi, Y.; Takagi, M.; Saita, K.; Suzuki, K.; Ichino, T.; Sumiya, Y.; Sugiyama, K.; Ono, Y. Implementation and performance of the artificial force induced reaction method in the GRRM17 program. *J. Comput. Chem.* **2018**, *39*, 233-251.
5. Maeda, S.; Harabuchi, Y.; Takagi, M.; Taketsugu, T.; Morokuma, K. Artificial force induced reaction (AFIR) method for exploring quantum chemical potential energy surfaces. *Chem. Rec.* **2016**, *16*, 2232-2248.
6. Maeda, S.; Ohno, K.; Morokuma, K. Systematic exploration of the mechanism of chemical reactions: the global reaction route mapping (GRRM) strategy using the ADDF and AFIR methods. *Phys. Chem. Chem. Phys.* **2013**, *15*, 3683-3701.
7. McLean, A. D.; Chandler, G. S. Contracted Gaussian basis sets for molecular calculations. I. Second row atoms, Z=11-18. *J. Chem. Phys.* **1980**, *72*, 5639-5648.
8. Ditchfield, R.; Hehre, W. J.; Pople, J. A. Self - Consistent Molecular - Orbital Methods. IX. An Extended Gaussian - Type Basis for Molecular - Orbital Studies of Organic Molecules. *J. Chem. Phys.* **1971**, *54*, 724-728.
9. Hariharan, P. C.; Pople, J. A. The influence of polarization functions on molecular orbital hydrogenation energies. *Theor. Chem. Acc.* **1973**, *28*, 213-222.
10. Fukui, K. The path of chemical reactions - the IRC approach. *Acc. Chem. Res.* **1981**, *14*, 363-368.
11. Cramer, C. J. *Essentials of Computational Chemistry: Theories and Models*. 2nd ed.; Wiley: 2004.
12. Winget, P.; Cramer, C. J.; Truhlar, D. G. Computation of equilibrium oxidation and reduction potentials for reversible and dissociative electron-transfer reactions in solution. *Theor. Chem. Acc.* **2004**, *112*, 217-227.
13. Maeda, S.; Harabuchi, Y.; Sumiya, Y.; Takagi, M.; Suzuki, K.; Sugiyama, K.; Ono, Y.; Hatanaka, M.; Osada, Y.; Taketsugu, T.; Morokuma, K.; Ohno, K. GRRM17: [http://iqce.jp/GRRM/index\\_e.shtml](http://iqce.jp/GRRM/index_e.shtml).
14. Frisch, M. J.; Trucks, G. W.; Schlegel, H. B.; Scuseria, G. E.; Robb, M. A.; Cheeseman, J. R.; Scalmani, G.; Barone, V.; Mennucci, B.; Petersson, G. A.; Nakatsuji, H.; Caricato, M.; Li, X.; Hratchian, H. P.; Izmaylov, A. F.; Bloino, J.; Zheng, G.; Sonnenberg, J. L.; Hada, M.; Ehara, M.; Toyota, K.; Fukuda, R.; Hasegawa, J.; Ishida, M.; Nakajima, T.; Honda, Y.; Kitao, O.; Nakai, H.; Vreven, T.; Montgomery, J. A. J.; Peralta, J. E.; Ogliaro, F.; Bearpark, M.; Heyd, J. J.; Brothers, E.; Kudin, K. N.; Staroverov, V. N.; Keith, T.; Kobayashi, R.; Normand, J.; Raghavachari, K.; Rendell, A.; Burant, J. C.; Iyengar, S. S.; Tomasi, J.;



Cossi, M.; Rega, N.; Millam, J. M.; Klene, M.; Knox, J. E.; Cross, J. B.; Bakken, V.; Adamo, C.; Jaramillo, J.; Gomperts, R.; Stratmann, R. E.; Yazyev, O.; Austin, A. J.; Cammi, R.; Pomelli, C.; Ochterski, J. W.; Martin, R. L.; Morokuma, K.; Zakrzewski, V. G.; Voth, G. A.; Salvador, P.; Dannenberg, J. J.; Dapprich, S.; Daniels, A. D.; Farkas, O.; Foresman, J. B.; Ortiz, J. V.; Cioslowski, J.; Fox, J. D. Gaussian 09, Revision E.01, Gaussian, Inc., Wallingford CT, 2010.

15. Clark, V. M.; Kirby, A. J. Neighboring Group Participation in Phosphate Ester Hydrolysis. *J. Am. Chem. Soc.* **1963**, *85*, 3705-3706.

### Cartesian Coordinates of the Critical Points

The electronic energies and Gibbs free energies at 373.15 K and 1atm (without the correction terms of 2.54 kcal mol<sup>-1</sup>) are shown in atomic unit. The Cartesian coordinates are in Å.

#### 3-phenylpropan-1-ol (ROH: 1)

Electronic Energy = -425.455530641 / Gibbs Free Energy = -425.313460688

|   |                 |                 |                 |
|---|-----------------|-----------------|-----------------|
| C | -1.293725518814 | 0.779219337764  | -0.279277580828 |
| H | -0.391236683292 | 0.984053517740  | -0.872795520465 |
| H | -1.475798251712 | 1.667203821243  | 0.339132877728  |
| C | -1.041120314383 | -0.444494894670 | 0.622517491073  |
| H | -0.875449150039 | -1.327428766692 | -0.008596485742 |
| H | -1.943359652073 | -0.643757225986 | 1.215387399426  |
| C | 0.143370325407  | -0.241627079621 | 1.541821912015  |
| C | -0.019796559901 | 0.348151377347  | 2.803686820269  |
| C | 1.437709981998  | -0.593666900101 | 1.132543626694  |
| C | 1.078421220543  | 0.579674770277  | 3.635384601895  |
| H | -1.017867862508 | 0.625254955527  | 3.136606794265  |
| C | 2.539604005995  | -0.364291811149 | 1.959970460779  |
| H | 1.580983430421  | -1.054034854859 | 0.157183332383  |
| C | 2.363426003904  | 0.223953981186  | 3.215687094403  |
| H | 0.930251653759  | 1.034018531675  | 4.611715226574  |
| H | 3.534340779738  | -0.647978896192 | 1.625839774816  |
| H | 3.218805534966  | 0.400317105962  | 3.862321452731  |
| C | -2.480392530797 | 0.576951280269  | -1.221311609601 |
| H | -2.315404079210 | -0.316017609569 | -1.846363717953 |
| H | -3.394943335882 | 0.403137654909  | -0.642553391094 |
| O | -2.746512029024 | 1.725203023433  | -2.026601881118 |
| H | -1.961814549106 | 1.880072551504  | -2.576836628226 |

#### POS (PO<sub>3</sub>SO<sub>4</sub><sup>2-</sup>: 45)

Electronic Energy = -1267.18519708 / Gibbs Free Energy = -1267.18981843

|   |                 |                 |                 |
|---|-----------------|-----------------|-----------------|
| O | -1.295814526079 | -0.615525198368 | 0.509808060592  |
| P | -1.251019065406 | 1.000125935985  | -0.040942530416 |
| S | -0.513029847620 | -1.871381349582 | -0.241415867087 |
| O | -0.335959787596 | -2.832404385037 | 0.861622730193  |
| O | 0.768797407749  | -1.289490928148 | -0.739774632775 |
| O | -1.400768049383 | -2.336040567292 | -1.322175010839 |
| O | -1.714871329476 | 1.039119480246  | -1.466687449919 |
| O | -1.940878879818 | 1.777735661468  | 1.035943228476  |
| O | 0.358359210983  | 1.280555053625  | 0.063138928746  |
| H | 0.814247556649  | 0.484884557096  | -0.300831806968 |

#### Protonated POS (HPO<sub>3</sub>SO<sub>4</sub><sup>-</sup>)

Electronic Energy = -1267.63859747 / Gibbs Free Energy = -1267.63205134

|   |                 |                 |                 |
|---|-----------------|-----------------|-----------------|
| P | 1.460956834798  | 0.029154522616  | 0.134902994698  |
| S | -1.457894957143 | -0.045626101343 | -0.006932517070 |
| O | 2.605913575312  | -0.018725233552 | 1.060647383293  |
| O | 1.451560994748  | -1.174555764666 | -0.921903467407 |
| H | 0.526650123683  | -1.417319216046 | -1.174165476140 |
| O | -1.309778900432 | -1.196628747875 | -0.925521768609 |
| O | -2.454739776590 | -0.182924602091 | 1.045294577080  |
| O | -1.392358792389 | 1.270188186069  | -0.681041531699 |
| O | 0.019910018188  | -0.085012554743 | 0.891167702918  |
| O | 1.369747187750  | 1.400229012279  | -0.688642669737 |
| H | 0.429789482080  | 1.635345259351  | -0.886260857320 |

#### ROSO<sub>3</sub><sup>-</sup>: 46

Electronic Energy = -1048.87351623 / Gibbs Free Energy = -1048.73668369

|   |                 |                |                 |
|---|-----------------|----------------|-----------------|
| C | -1.339944506743 | 0.667265379706 | -0.299489178867 |
| H | -0.483303300179 | 0.501823243379 | -0.965031437428 |
| H | -1.264255370440 | 1.698891676781 | 0.068232713574  |

|   |                 |                 |                 |
|---|-----------------|-----------------|-----------------|
| C | -1.270060769532 | -0.311843740453 | 0.888139608657  |
| H | -1.365324771357 | -1.333845719990 | 0.505600182012  |
| H | -2.132895823583 | -0.133886406659 | 1.543451401612  |
| C | 0.014429832104  | -0.165137912529 | 1.672634861163  |
| C | 0.108384024665  | 0.747006517237  | 2.734037737762  |
| C | 1.155963546524  | -0.902198245876 | 1.324986253171  |
| C | 1.307342694607  | 0.918533096043  | 3.430156376200  |
| H | -0.768552414359 | 1.325137186788  | 3.018150934637  |
| C | 2.357902333213  | -0.734417464149 | 2.016977226374  |
| H | 1.099357828220  | -1.615695580440 | 0.505537106909  |
| C | 2.437683119124  | 0.177609877859  | 3.073264587230  |
| H | 1.357898969293  | 1.627479694040  | 4.252679196318  |
| H | 3.230121618894  | -1.318303106175 | 1.734146739441  |
| H | 3.370701220522  | 0.307389556439  | 3.615143338452  |
| C | -2.628767760319 | 0.542099171288  | -1.098436007583 |
| H | -3.502624772330 | 0.671741417846  | -0.447276110820 |
| H | -2.673072775337 | 1.291576864693  | -1.897525216167 |
| O | -2.660929926549 | -0.776474958267 | -1.681823994678 |
| S | -4.094036776487 | -1.186930308775 | -2.432215574097 |
| O | -5.116400053094 | -1.167843682035 | -1.363959656690 |
| O | -4.301708940622 | -0.156764519738 | -3.472805128900 |
| O | -3.764614896244 | -2.528117027015 | -2.946490418283 |

#### ROPO<sub>3</sub>H<sup>-</sup>: 47

Electronic Energy = -992.789285324 / Gibbs Free Energy = -992.644165603

|   |                 |                 |                 |
|---|-----------------|-----------------|-----------------|
| C | -0.423949876064 | -0.843242365958 | 0.755922142714  |
| H | -0.629852990966 | 0.040259483238  | 1.373591888735  |
| H | -0.814593298205 | -0.629328447408 | -0.247065352486 |
| C | -1.150452594366 | -2.067925995529 | 1.343811410257  |
| H | -0.748142609921 | -2.279800628002 | 2.342874681053  |
| H | -0.933013654405 | -2.946161804901 | 0.721768601445  |
| C | -2.646220346118 | -1.855906645104 | 1.426543191015  |
| C | -3.234915504775 | -1.323835667547 | 2.582639467948  |
| C | -3.471459338037 | -2.141330002486 | 0.328888544205  |
| C | -4.609963165502 | -1.083481596480 | 2.642767147891  |
| H | -2.608816520153 | -1.098698228274 | 3.443499955107  |
| C | -4.846649842766 | -1.902803467505 | 0.383148316446  |
| H | -3.030204797777 | -2.556498076829 | -0.574871170435 |
| C | -5.421229675874 | -1.372204221724 | 1.541875937215  |
| H | -5.047512865664 | -0.674094774026 | 3.549732620351  |
| H | -5.469506984630 | -2.134206246524 | -0.477177474121 |
| H | -6.491347673826 | -1.188487550957 | 1.587322206158  |
| C | 1.081095992771  | -1.054462840823 | 0.671533599593  |
| H | 1.503174349359  | -1.244538328909 | 1.667311453035  |
| H | 1.311183829578  | -1.923198679671 | 0.038304560971  |
| O | 1.673940196089  | 0.122403274146  | 0.109056826337  |
| P | 3.311013146244  | 0.130384753750  | -0.125183817592 |
| O | 4.010721499265  | -0.381418946926 | 1.099272551983  |
| O | 3.480717615055  | -1.058065838540 | -1.269842926445 |
| H | 3.137260976288  | -0.737434626571 | -2.120065507425 |
| O | 3.613984974403  | 1.467028629545  | -0.736442513942 |

#### POSOP ((HPO<sub>3</sub>)<sub>2</sub>SO<sub>4</sub><sup>2-</sup>): 48)

Electronic Energy = -1834.96655558 / Gibbs Free Energy = -1834.9539787

|   |                 |                 |                 |
|---|-----------------|-----------------|-----------------|
| O | -0.964298502768 | -0.510663050984 | 0.095498394899  |
| P | -2.510858522320 | -1.010098058175 | 0.768398223570  |
| O | -2.304304423642 | -2.409684861191 | 1.292056237603  |
| O | -2.869124167733 | 0.128889076490  | 1.652000286176  |
| O | -3.401147955071 | -1.006893495191 | -0.560958633918 |
| H | -3.274857790231 | -1.852426688363 | -1.102101259698 |
| S | 0.171058236295  | -1.443223786524 | -0.525707639068 |
| O | 1.084281982194  | -0.539563687433 | -1.206953191122 |
| O | 0.701230240046  | -2.336066505682 | 0.491639797468  |
| O | -0.579096666693 | -2.253154543267 | -1.664906727057 |

|   |                 |                 |                 |
|---|-----------------|-----------------|-----------------|
| P | -1.526698830284 | -3.750768387977 | -1.692257453043 |
| O | -2.923908167144 | -3.215139573599 | -1.896389005478 |
| O | -0.853600071603 | -4.605436877163 | -2.702920853697 |
| O | -1.314231922596 | -4.319178985075 | -0.216419749818 |
| H | -1.696235118462 | -3.675169105876 | 0.459754083189  |

**Protonated POSOP (H(HPO<sub>3</sub>)<sub>2</sub>SO<sub>4</sub><sup>-</sup>)**

Electronic Energy = -1835.39913704 / Gibbs Free Energy = -1835.3773535

|   |                 |                 |                 |
|---|-----------------|-----------------|-----------------|
| O | -1.529048800565 | 0.778808877735  | -0.220693073102 |
| P | -1.743276519288 | -0.810603099459 | 0.223664833334  |
| O | -1.085333123300 | -1.100854876013 | 1.522060387105  |
| O | -1.292404355801 | -1.645414290911 | -1.020788238059 |
| H | -0.259931962040 | -1.808638022179 | -1.013033427020 |
| S | -0.108724499966 | 1.612927861416  | -0.047990662803 |
| O | -0.271935077241 | 2.748684151709  | -0.926937348153 |
| O | 0.130443526126  | 1.801450801298  | 1.366573993814  |
| O | 0.924417669400  | 0.632067298906  | -0.704079704280 |
| P | 1.920754436065  | -0.741505571523 | -0.105233356058 |
| O | 1.215921564704  | -1.888619824101 | -0.792703896365 |
| O | 3.315724330681  | -0.357011110323 | -0.403389738657 |
| O | 1.622618855154  | -0.709028818335 | 1.462565542741  |
| H | 0.675727279155  | -0.925264991244 | 1.667775504088  |
| O | -3.324221283029 | -0.896458765477 | 0.282926381452  |
| H | -3.768414950050 | -0.895358021505 | -0.584753798029 |

**ROSO<sub>3</sub>PO<sub>3</sub>H<sup>-</sup>: 49**

Electronic Energy = -1616.63677101 / Gibbs Free Energy = -1616.48400844

|   |                 |                 |                 |
|---|-----------------|-----------------|-----------------|
| O | 2.815301447172  | -0.038027973862 | -0.561078427213 |
| P | 3.241495259773  | -0.863917505804 | 0.967188850455  |
| S | 1.860590671689  | 1.219600645335  | -0.649632559391 |
| O | 1.128137457841  | 1.377458634800  | 0.606128431431  |
| O | 0.856301749483  | 0.747093569683  | -1.811574588900 |
| O | 2.568502567025  | 2.355290455244  | -1.205796297018 |
| C | -1.351046998038 | 0.041571936840  | -0.973396788465 |
| H | -1.194196745025 | 0.623754885951  | -0.060014417109 |
| H | -1.836808645138 | 0.698535875269  | -1.704284800644 |
| C | -2.256963649621 | -1.168493243507 | -0.669695311474 |
| H | -1.748299664002 | -1.822885151656 | 0.050005669921  |
| H | -2.402216882768 | -1.754219155680 | -1.586183072961 |
| C | -3.596516307264 | -0.737145410526 | -0.113596663845 |
| C | -4.687261653971 | -0.505186332746 | -0.963036772125 |
| C | -3.759278050799 | -0.513609981860 | 1.261264060288  |
| C | -5.910530829193 | -0.062310235696 | -0.453628028289 |
| H | -4.576629851952 | -0.675674620313 | -2.031808822720 |
| C | -4.979979703254 | -0.070746824144 | 1.775533543192  |
| H | -2.921776540541 | -0.691091339519 | 1.932733465767  |
| C | -6.060797167259 | 0.156593984607  | 0.918538356350  |
| H | -6.746099301594 | 0.108337273453  | -1.127531473882 |
| H | -5.088091379426 | 0.093183456212  | 2.844580838390  |
| H | -7.012279614860 | 0.498319393758  | 1.317023865335  |
| C | -0.004701786600 | -0.409799134368 | -1.514014742979 |
| H | 0.514238863936  | -1.072827205694 | -0.815980105012 |
| H | -0.096597439218 | -0.918207023252 | -2.475777063340 |
| O | 3.830830152687  | 0.188090927325  | 1.840896778646  |
| O | 3.944986234137  | -2.075256699997 | 0.474073992217  |
| O | 1.740784586893  | -1.284591473354 | 1.442868226328  |
| H | 1.243275119888  | -0.485802146499 | 1.702182877070  |

**HSO<sub>4</sub><sup>-</sup>**

Electronic Energy = -699.852686245 / Gibbs Free Energy = -699.863727569

|   |                 |                 |                 |
|---|-----------------|-----------------|-----------------|
| O | -0.979754187228 | -0.438125139331 | 0.797270117584  |
| O | -1.561651524229 | 1.967276762607  | 0.828123910568  |
| O | 0.026403386478  | 1.100522558545  | -0.878441212429 |
| O | -2.333705662084 | 0.529639166460  | -1.073129447383 |

|   |                 |                |                 |
|---|-----------------|----------------|-----------------|
| H | -3.127116954526 | 0.303766964716 | -0.553082641497 |
| S | -1.101762818412 | 0.815529677001 | 0.024205193156  |

### H<sub>2</sub>PO<sub>4</sub><sup>-</sup>

Electronic Energy = -643.771744966 / Gibbs Free Energy = -643.774758683

|   |                 |                 |                 |
|---|-----------------|-----------------|-----------------|
| O | -2.711384848174 | 1.530638797457  | -2.171487122279 |
| O | -4.092744520192 | 2.496262942332  | -4.107207237778 |
| H | -3.805545036764 | 3.298815875505  | -3.641786926024 |
| P | -3.815859453293 | 1.183994837320  | -3.132640398524 |
| O | -3.776511279083 | -0.009261586924 | -4.036987001093 |
| O | -5.229153652645 | 1.089527477143  | -2.268326838476 |
| H | -5.084530439851 | 1.504023657165  | -1.402307225824 |

### PEP<sup>-</sup>

Electronic Energy = -909.749353511 / Gibbs Free Energy = -909.7110822

|   |                 |                 |                 |
|---|-----------------|-----------------|-----------------|
| C | 0.986299629657  | 1.004718245410  | -0.113912068489 |
| C | 2.264934554899  | 0.223613210351  | -0.277550039101 |
| O | 3.321140173334  | 0.614073636327  | 0.455683414282  |
| H | 3.041239725211  | 1.246209667729  | 1.141373783330  |
| O | 2.395889035773  | -0.691704659133 | -1.073630120993 |
| O | -0.168767834466 | 0.356795267264  | -0.411625319762 |
| C | 1.003703237900  | 2.318648777049  | 0.153133120653  |
| H | 0.075843204342  | 2.877938344158  | 0.202450091816  |
| H | 1.930401634886  | 2.869272750665  | 0.269866680885  |
| P | -0.478697534709 | -1.195417156455 | 0.239230845578  |
| O | 0.462644658787  | -1.356268239056 | 1.397359377707  |
| O | -1.962124222633 | -1.293308394216 | 0.368794605426  |
| O | -0.019116025252 | -2.105349364938 | -1.038789519823 |
| H | 0.884383862276  | -1.818553885151 | -1.293327391510 |

### PEP-H

Electronic Energy = -910.197377321 / Gibbs Free Energy = -910.150056356

|   |                 |                 |                 |
|---|-----------------|-----------------|-----------------|
| C | -0.223567371120 | -1.402195926277 | 0.497656050915  |
| C | -0.793202466676 | -2.363580729059 | -0.489761589199 |
| O | -0.029397682918 | -3.439191479900 | -0.679527559290 |
| H | -0.457589724008 | -4.002188709662 | -1.354081317022 |
| O | -1.855530869728 | -2.191814119149 | -1.078196971198 |
| O | -1.070963360245 | -0.374772712647 | 0.882840631678  |
| C | 0.984907289008  | -1.529148377359 | 1.048394989086  |
| H | 1.343893934429  | -0.793258585933 | 1.759215055674  |
| H | 1.620964949276  | -2.368569985771 | 0.798084670443  |
| P | -1.532455298459 | 0.870124183301  | -0.073900128639 |
| O | -1.786327700382 | 2.079997347547  | 0.726238141397  |
| O | -0.390415449547 | 0.956654548468  | -1.200967156963 |
| O | -2.777589210984 | 0.323188046826  | -0.886578539478 |
| H | -2.661973278688 | -0.649374729673 | -1.060194735756 |
| H | 0.427008640033  | 1.387619139293  | -0.892370681684 |

### Pyruvate (CH<sub>3</sub>COCOO<sup>-</sup>)

Electronic Energy = -341.979953415 / Gibbs Free Energy = -341.961703762

|   |                 |                 |                 |
|---|-----------------|-----------------|-----------------|
| C | 0.816085483098  | -0.234249868616 | 0.003728149777  |
| O | 0.903230107967  | -1.490509440180 | 0.011140108535  |
| O | 1.725433686207  | 0.628658283166  | 0.000054321028  |
| C | -0.659056335166 | 0.316909164641  | -0.001535560315 |
| C | -1.768813523195 | -0.717383800577 | -0.001445220634 |
| H | -1.672438627493 | -1.365001874169 | 0.876843257763  |
| H | -2.748061051155 | -0.230431850380 | -0.006720845094 |
| H | -1.666359012746 | -1.372000140492 | -0.873827169775 |
| O | -0.903725727514 | 1.514405526610  | -0.005200041283 |

### Pyruvic acid (CH<sub>3</sub>COCOOH)

Electronic Energy = -342.436347515 / Gibbs Free Energy = -342.404616803

|   |                 |                 |                |
|---|-----------------|-----------------|----------------|
| C | -2.687406874957 | 0.686694642396  | 0.309518773293 |
| O | -3.049209710068 | -0.339291887288 | 0.840138866685 |

|   |                 |                 |                 |
|---|-----------------|-----------------|-----------------|
| O | -3.467959855914 | 1.760536972044  | 0.163889708741  |
| H | -2.929242770925 | 2.443488255804  | -0.294781306389 |
| C | -1.265474746272 | 0.889307161243  | -0.273356081299 |
| C | -0.317033149778 | -0.261276488821 | -0.158616537446 |
| H | -0.738829523187 | -1.136238943682 | -0.666844769159 |
| H | 0.648646523427  | 0.000992774036  | -0.592710866577 |
| H | -0.200465115520 | -0.538270363756 | 0.895464152052  |
| O | -1.017082466811 | 1.968473448021  | -0.784034909897 |

### HNEt<sub>3</sub><sup>+</sup>

Electronic Energy = -292.922599539 / Gibbs Free Energy = -292.744371097

|   |                 |                 |                 |
|---|-----------------|-----------------|-----------------|
| N | 0.003446190682  | 0.000513001261  | -0.012691192804 |
| C | -0.762566440684 | -1.236197833832 | 0.431731715644  |
| H | -0.070742886440 | -2.076012183983 | 0.365250211322  |
| H | -1.007231947487 | -1.074625119146 | 1.484039411239  |
| C | -1.997041976870 | -1.494872487453 | -0.420726919478 |
| H | -1.728288547571 | -1.663304467900 | -1.469079118509 |
| H | -2.485319008082 | -2.400515504194 | -0.049428385960 |
| H | -2.724612321620 | -0.680193891167 | -0.369761243113 |
| C | 1.454231988378  | -0.043803717288 | 0.442534297221  |
| H | 1.830614414329  | 0.978117422957  | 0.396849019114  |
| H | 1.430690602405  | -0.354359299117 | 1.489383024850  |
| C | 2.306466083343  | -0.963971196649 | -0.419929323719 |
| H | 2.318826638767  | -0.629639162559 | -1.462831866805 |
| H | 3.333420455023  | -0.932485714619 | -0.044678598899 |
| H | 1.971439689700  | -2.004277359191 | -0.386417377361 |
| C | -0.685491510670 | 1.280433966098  | 0.435374328471  |
| H | -1.758747879796 | 1.098386782989  | 0.380244153706  |
| H | -0.413708192369 | 1.414769981792  | 1.484822518493  |
| C | -0.303232250272 | 2.477916354791  | -0.423461886633 |
| H | -0.838769661052 | 3.354503110060  | -0.047553158009 |
| H | 0.766863134009  | 2.700569902975  | -0.386333504516 |
| H | -0.596595100286 | 2.326130343569  | -1.467680942789 |
| H | 0.009090896568  | 0.000831780604  | -1.038881311466 |

### Int1a

Electronic Energy = -1692.65401854 / Gibbs Free Energy = -1692.48685781

|   |                 |                 |                 |
|---|-----------------|-----------------|-----------------|
| C | 1.382592031227  | -0.833787398685 | -1.292114792775 |
| H | 1.612479888906  | -1.833695785977 | -1.685002626967 |
| H | 2.327669918626  | -0.294810803326 | -1.185126078630 |
| C | 0.729054877683  | -0.937933562532 | 0.097344256701  |
| H | -0.170146751740 | -1.566227716500 | 0.046083542671  |
| H | 0.408933640553  | 0.069551554268  | 0.390416172861  |
| C | 1.686977620831  | -1.475057153238 | 1.138547687034  |
| C | 2.765089727773  | -0.679028018393 | 1.561110998863  |
| C | 1.555612892254  | -2.763555392082 | 1.672153907067  |
| C | 3.686175360879  | -1.163415992379 | 2.490214724394  |
| H | 2.890403053329  | 0.317460834371  | 1.147172678943  |
| C | 2.475426938741  | -3.250531553544 | 2.607642896944  |
| H | 0.726766033997  | -3.392633074354 | 1.352851914197  |
| C | 3.544893485356  | -2.451455260109 | 3.019782108347  |
| H | 4.514740702366  | -0.527224223942 | 2.789619922111  |
| H | 2.355803894620  | -4.253201089411 | 3.011414518933  |
| H | 4.261728627153  | -2.829051385574 | 3.744915078725  |
| C | 0.519315169863  | -0.065352874752 | -2.293157272504 |
| H | -0.399286277667 | -0.621418158299 | -2.522396863939 |
| H | 0.228308202890  | 0.892666611236  | -1.837044865032 |
| O | 1.187177834528  | 0.147132971136  | -3.535204121408 |
| H | 1.954616870047  | 0.717172096312  | -3.322399859938 |
| O | 4.426565877349  | 3.128323747875  | -0.708142527712 |
| P | 2.885763468642  | 2.843381385244  | -1.367963720009 |
| S | 5.389457811739  | 1.948957121669  | -0.029940668266 |
| O | 6.740453904210  | 2.503625776228  | -0.219436389764 |
| O | 5.129441158874  | 0.725216247049  | -0.844705699201 |

|   |                |                |                 |
|---|----------------|----------------|-----------------|
| O | 4.969862838015 | 1.827172210690 | 1.376198809235  |
| O | 2.017732172243 | 2.198626113435 | -0.331279046001 |
| O | 2.504686439353 | 4.124758485703 | -2.039273444039 |
| O | 3.311454971440 | 1.763773485558 | -2.544186341152 |
| H | 3.962722008197 | 1.138204671670 | -2.138335473671 |

### TS1

Electronic Energy = -1692.62023556 / Gibbs Free Energy = -1692.45504314

|   |                 |                 |                 |
|---|-----------------|-----------------|-----------------|
| C | 0.999506072164  | -0.743655156223 | -1.215365917673 |
| H | 1.136658506275  | -1.708298711308 | -1.723621291287 |
| H | 1.978084339079  | -0.264184857161 | -1.164231579347 |
| C | 0.502347165114  | -0.971769094299 | 0.224809627616  |
| H | -0.375946058838 | -1.629130352119 | 0.235518579801  |
| H | 0.185208720897  | -0.002761637713 | 0.631162124450  |
| C | 1.600986929964  | -1.533509866739 | 1.102904136394  |
| C | 2.707462299123  | -0.726112856159 | 1.417178200522  |
| C | 1.572112095113  | -2.847121638759 | 1.585575786829  |
| C | 3.757349875941  | -1.220360539622 | 2.190638851968  |
| H | 2.750021180358  | 0.294659237065  | 1.044911426534  |
| C | 2.622224578902  | -3.346919540954 | 2.364333703760  |
| H | 0.722879372333  | -3.485410387050 | 1.349741485226  |
| C | 3.718221733166  | -2.535713886697 | 2.668289979592  |
| H | 4.599163721720  | -0.568834107878 | 2.407874454404  |
| H | 2.582489297972  | -4.370113880278 | 2.730389315802  |
| H | 4.534976308910  | -2.924966273460 | 3.271057921583  |
| C | 0.091835374830  | 0.171098063953  | -2.039303675125 |
| H | -0.767413722429 | -0.379335973054 | -2.449775602770 |
| H | -0.285680092677 | 0.981374901148  | -1.410132058554 |
| O | 0.799844350900  | 0.824506356538  | -3.110290108283 |
| H | 1.542697529067  | 0.257599814426  | -3.375531861863 |
| O | 4.786952713218  | 3.304521100870  | -0.497727788741 |
| P | 2.610615475345  | 2.371258933040  | -1.861528856464 |
| S | 5.597893911446  | 2.309543959066  | 0.263651172812  |
| O | 7.027583430999  | 2.667981558875  | 0.370779578360  |
| O | 5.597566498975  | 0.968777244602  | -0.667352457151 |
| O | 4.984778622298  | 1.925707807791  | 1.556635686170  |
| O | 1.829473347224  | 2.280021994627  | -0.592123672383 |
| O | 2.494463460010  | 3.552269965775  | -2.770112231471 |
| O | 3.529754239029  | 1.233482980554  | -2.261181891030 |
| H | 4.783688222625  | 1.016096917298  | -1.266960025185 |

### Int1b

Electronic Energy = -1692.6423495 / Gibbs Free Energy = -1692.4795784

|   |                 |                 |                 |
|---|-----------------|-----------------|-----------------|
| C | 1.226877721234  | 0.059924061996  | -0.374683399150 |
| H | 1.384580991916  | -0.681143698489 | -1.165744353976 |
| H | 2.214020365770  | 0.351291724920  | 0.004891931400  |
| C | 0.391034422111  | -0.565740700366 | 0.758509797946  |
| H | -0.603978037454 | -0.815284067393 | 0.367185011537  |
| H | 0.243287950364  | 0.173878517771  | 1.555605453431  |
| C | 1.044727581650  | -1.808922019643 | 1.320167999422  |
| C | 1.852459571984  | -1.749375921829 | 2.463983503487  |
| C | 0.889955383164  | -3.044923662378 | 0.674831331154  |
| C | 2.487518899736  | -2.893865067348 | 2.954022998873  |
| H | 1.982766770596  | -0.798160958182 | 2.975672719879  |
| C | 1.521754817492  | -4.191531892259 | 1.160301213050  |
| H | 0.266681671384  | -3.105369406166 | -0.214980286147 |
| C | 2.323763134764  | -4.119638301371 | 2.303491065726  |
| H | 3.107187881210  | -2.828012196851 | 3.844705655430  |
| H | 1.385535143718  | -5.140997951039 | 0.648930595301  |
| H | 2.814031225384  | -5.011439493508 | 2.684685230282  |
| C | 0.525115998106  | 1.268081252798  | -0.973588349389 |
| H | -0.454901590855 | 1.003461995276  | -1.373716770860 |
| H | 0.411451440653  | 2.074940854081  | -0.245430972017 |
| O | 1.329828802193  | 1.819780034139  | -2.055811020587 |

|   |                 |                 |                 |
|---|-----------------|-----------------|-----------------|
| H | 1.531244409583  | 1.066595278442  | -2.719783649519 |
| O | 1.747930426577  | -0.170801269654 | -3.656056182715 |
| P | 0.565553130364  | 3.312061211858  | -3.053286219213 |
| S | 0.457883838194  | -0.557873567369 | -4.342470985992 |
| O | 0.609895600360  | -1.770585389663 | -5.164830382286 |
| O | 0.169758201271  | 0.630782264442  | -5.384783210540 |
| O | -0.670450342244 | -0.600862246701 | -3.386702599794 |
| O | -0.889312127644 | 3.160795780484  | -2.706952273080 |
| O | 1.362324937613  | 4.447377708308  | -2.477445615597 |
| O | 1.007918224127  | 2.812161584636  | -4.434555464952 |
| H | 0.488433595710  | 1.545930110072  | -4.970480099894 |

### TS1'

Electronic Energy = -1692.64268543 / Gibbs Free Energy = -1692.48187878

|   |                 |                 |                 |
|---|-----------------|-----------------|-----------------|
| C | 1.202635089259  | -0.038246558247 | -0.364438270404 |
| H | 1.422214448936  | -0.796848491272 | -1.124616159351 |
| H | 2.162114704333  | 0.310405401356  | 0.036563488753  |
| C | 0.359559645820  | -0.666072735886 | 0.762570938818  |
| H | -0.600850538467 | -0.997010801841 | 0.346079827008  |
| H | 0.132614854658  | 0.098419857433  | 1.516522532145  |
| C | 1.067489690113  | -1.835223210687 | 1.411534443171  |
| C | 1.812768585358  | -1.666151989406 | 2.586473488197  |
| C | 1.028434303024  | -3.107525871843 | 0.821863779938  |
| C | 2.500457480003  | -2.738788147734 | 3.160475783594  |
| H | 1.851728581521  | -0.685623629753 | 3.056147359521  |
| C | 1.713957380223  | -4.182724914420 | 1.391014846008  |
| H | 0.453305877384  | -3.253921748291 | -0.090096795136 |
| C | 2.453112754373  | -4.001538694776 | 2.564052395186  |
| H | 3.069900430643  | -2.588314929955 | 4.074101402591  |
| H | 1.668587292118  | -5.161988299104 | 0.921425261403  |
| H | 2.984976097949  | -4.837699788162 | 3.010138860052  |
| C | 0.471983716961  | 1.121403530333  | -1.021865382051 |
| H | -0.482682793633 | 0.808788649306  | -1.450055033052 |
| H | 0.300509860713  | 1.940893188744  | -0.320431809902 |
| O | 1.298913345906  | 1.665405192144  | -2.091984286832 |
| H | 1.442157157692  | 0.903449248291  | -2.806963565733 |
| O | 1.563187065916  | -0.216124973710 | -3.734240919354 |
| P | 0.673441260487  | 3.227085573661  | -2.964821484153 |
| S | 0.300818425511  | -0.433198246643 | -4.563507814087 |
| O | 0.475218826720  | -1.570420830101 | -5.487752298389 |
| O | 0.151373080112  | 0.865691377946  | -5.446719767315 |
| O | -0.887733746512 | -0.541816318179 | -3.684888722015 |
| O | -0.804396264825 | 3.147237961147  | -2.713772701447 |
| O | 1.508462434542  | 4.288394525408  | -2.313659482696 |
| O | 1.148244237256  | 2.812563270535  | -4.380975416889 |
| H | 0.598186928060  | 1.782885136889  | -4.925896029266 |

### Int1c

Electronic Energy = -1692.66229146 / Gibbs Free Energy = -1692.49537512

|   |                 |                 |                 |
|---|-----------------|-----------------|-----------------|
| C | 1.212085758584  | 0.336949627099  | -0.379208830213 |
| H | 1.475038685771  | -0.364040519765 | -1.174656271595 |
| H | 2.145579747070  | 0.680885533570  | 0.084039691664  |
| C | 0.342508446480  | -0.401705658089 | 0.654446293822  |
| H | -0.630914251657 | -0.615949667532 | 0.193519947791  |
| H | 0.150753416340  | 0.244992716892  | 1.519776493901  |
| C | 0.974387271500  | -1.702557283144 | 1.101216288160  |
| C | 1.504738755604  | -1.861343475217 | 2.387325413798  |
| C | 1.059016569046  | -2.778976127488 | 0.201981537635  |
| C | 2.103641755689  | -3.065195973225 | 2.773154735579  |
| H | 1.447083628445  | -1.036238064216 | 3.094129656940  |
| C | 1.655567133657  | -3.981443961426 | 0.583603625530  |
| H | 0.656640977205  | -2.658734599153 | -0.802094141428 |
| C | 2.180433535366  | -4.129668224241 | 1.872437881748  |
| H | 2.507820280627  | -3.169800008372 | 3.776969813351  |



|   |                 |                 |                 |
|---|-----------------|-----------------|-----------------|
| H | 1.710445121121  | -4.805448641240 | -0.123633458981 |
| H | 2.643903511715  | -5.066584932806 | 2.170264572456  |
| C | 0.472978737641  | 1.510011349966  | -1.005674580821 |
| H | -0.499926044252 | 1.185832281781  | -1.387118524378 |
| H | 0.302875877080  | 2.310412863519  | -0.275019508278 |
| O | 1.266840536516  | 2.014224273065  | -2.101286413259 |
| H | 1.693624175866  | 0.698856617891  | -3.119764330960 |
| O | 1.850125595455  | -0.111683969830 | -3.683081642878 |
| P | 0.691786009341  | 3.344745677400  | -2.973850273712 |
| S | 0.394789972265  | -0.751230114915 | -4.078043057005 |
| O | 0.755531483836  | -1.789160704991 | -5.058664057733 |
| O | -0.385836664711 | 0.385391821584  | -4.659064357712 |
| O | -0.208011124078 | -1.263240823827 | -2.828576100217 |
| O | -0.773237458724 | 3.489834725196  | -2.669960723866 |
| O | 1.653581134280  | 4.478188136610  | -2.766223029001 |
| O | 0.938410069444  | 2.770385453542  | -4.479494620830 |
| H | 0.407845493339  | 1.947401503588  | -4.629787875535 |

### Int2a

Electronic Energy = -1692.65822584 / Gibbs Free Energy = -1692.49066393

|   |                 |                 |                 |
|---|-----------------|-----------------|-----------------|
| C | 2.409664376645  | 0.936208131933  | 0.127112003992  |
| H | 2.822201053035  | 0.489520904739  | -0.782132290669 |
| H | 3.070042585566  | 0.643585671309  | 0.955504026949  |
| C | 0.992146943419  | 0.379624701536  | 0.351148685612  |
| H | 0.350271871247  | 0.753476429963  | -0.456522987575 |
| H | 0.580816685916  | 0.765458320362  | 1.293672089372  |
| C | 0.945053464211  | -1.133728105348 | 0.352095326352  |
| C | 0.566780372646  | -1.855570943573 | 1.491781714408  |
| C | 1.289696808955  | -1.848953656048 | -0.808906849328 |
| C | 0.526747357066  | -3.253897449007 | 1.480648931727  |
| H | 0.298200439177  | -1.316890120505 | 2.398430826861  |
| C | 1.250935101392  | -3.244133079403 | -0.822046973337 |
| H | 1.606516362866  | -1.304045752458 | -1.694698541727 |
| C | 0.867663539220  | -3.954122673799 | 0.321605698506  |
| H | 0.229169755636  | -3.793088706159 | 2.376842935054  |
| H | 1.520500926604  | -3.781150032750 | -1.728617380312 |
| H | 0.836946113110  | -5.040669140178 | 0.308262027856  |
| C | 2.421945097506  | 2.459498611921  | -0.043846382710 |
| H | 1.608552679045  | 2.749978560162  | -0.721785076270 |
| H | 2.238881889229  | 2.949715766243  | 0.922885502613  |
| O | 3.671500107588  | 2.941995174474  | -0.530131430179 |
| H | 3.672400897624  | 2.742866104348  | -1.496877451818 |
| O | 1.266704805887  | 1.027723040978  | -2.903386865768 |
| P | 2.823255353950  | 1.043032718965  | -3.566855776841 |
| S | 0.030772031454  | 2.064659588510  | -3.299200596542 |
| O | -1.135331271789 | 1.369152029274  | -2.731688360656 |
| O | 0.047274053862  | 2.102477209648  | -4.793094134109 |
| O | 0.332906645307  | 3.369587311007  | -2.687296810071 |
| O | 3.476443906117  | 2.365247840863  | -3.241270677236 |
| O | 3.444998937224  | -0.244799577436 | -3.124244907222 |
| O | 2.471183186450  | 0.956585101552  | -5.157207635554 |
| H | 1.609254184595  | 1.417330639093  | -5.313139489287 |

### TS2

Electronic Energy = -1692.5804377 / Gibbs Free Energy = -1692.4185942

|   |                 |                 |                 |
|---|-----------------|-----------------|-----------------|
| C | 1.430648908828  | -0.039806288894 | -0.301672487359 |
| H | 2.228105474753  | -0.542013940139 | -0.864043647992 |
| H | 1.909821427588  | 0.495118521689  | 0.528535047330  |
| C | 0.446476913759  | -1.088674909464 | 0.250368595604  |
| H | -0.024922553632 | -1.611038535507 | -0.592591522463 |
| H | -0.357743509586 | -0.577153550616 | 0.795351927978  |
| C | 1.127088014347  | -2.088482618160 | 1.158770921107  |
| C | 1.158639043422  | -1.897403080232 | 2.547461770163  |
| C | 1.787542611336  | -3.205197449182 | 0.624695125112  |

|   |                 |                 |                 |
|---|-----------------|-----------------|-----------------|
| C | 1.829600796518  | -2.795550178369 | 3.381587432889  |
| H | 0.650406762672  | -1.037003934345 | 2.977795735642  |
| C | 2.460043825080  | -4.105978706963 | 1.453342442075  |
| H | 1.771629995553  | -3.367984025317 | -0.450961992403 |
| C | 2.483727615369  | -3.903786518328 | 2.836658497168  |
| H | 1.838958567916  | -2.631035810734 | 4.456119611959  |
| H | 2.962777220823  | -4.966862788303 | 1.019945762675  |
| H | 3.004499764388  | -4.604912628073 | 3.483417988294  |
| C | 0.743829221346  | 0.965050989644  | -1.227200782706 |
| H | 0.264346828855  | 0.445573476303  | -2.066387913192 |
| H | -0.026332419395 | 1.524409422677  | -0.681197940078 |
| O | 1.674837417329  | 1.913199945586  | -1.729924023457 |
| H | 2.296201686806  | 1.401375524566  | -2.395719393989 |
| O | 0.800018615895  | 1.307136765367  | -4.292970912515 |
| P | 2.212414607226  | 0.794018989712  | -4.676796197362 |
| S | 0.558697236411  | 3.544789023782  | -3.089842090211 |
| O | -0.619264752710 | 3.477468249303  | -3.961438023025 |
| O | 1.836545679628  | 3.987494638735  | -3.669302852048 |
| O | 0.233554559699  | 4.043294518867  | -1.746049400160 |
| O | 3.092620628159  | 0.667473517147  | -3.402577214938 |
| O | 2.228078600710  | -0.412792455679 | -5.593318235069 |
| O | 2.889016888246  | 2.041205176967  | -5.569064174363 |
| H | 2.651577410686  | 2.862445724028  | -5.098575299024 |

### Int2b

Electronic Energy = -1692.66039709 / Gibbs Free Energy = -1692.49439445

|   |                 |                 |                 |
|---|-----------------|-----------------|-----------------|
| C | 1.151964613693  | 0.548082811513  | -0.391055023355 |
| H | 1.784862618824  | 0.082857979663  | -1.150074536287 |
| H | 1.801726367506  | 0.991625752391  | 0.373527343363  |
| C | 0.248442535345  | -0.528490006760 | 0.238503988550  |
| H | -0.468542426134 | -0.867579383678 | -0.521515940218 |
| H | -0.338562816430 | -0.096613790552 | 1.058427829143  |
| C | 1.045833600705  | -1.715489755429 | 0.734426024299  |
| C | 1.234243203800  | -1.955337350434 | 2.101093281601  |
| C | 1.641017588991  | -2.591001510604 | -0.188492859433 |
| C | 1.995440592904  | -3.043446946289 | 2.540125901367  |
| H | 0.780118890662  | -1.285547709516 | 2.828192325547  |
| C | 2.400970560386  | -3.677996801623 | 0.244898454959  |
| H | 1.505431716945  | -2.408750054023 | -1.252497243520 |
| C | 2.580861377628  | -3.908722569684 | 1.613242432756  |
| H | 2.128716065106  | -3.214233291848 | 3.605426958266  |
| H | 2.851722613738  | -4.346807887577 | -0.483937765782 |
| H | 3.171170731339  | -4.755998653356 | 1.952031986873  |
| C | 0.330288003799  | 1.624017083698  | -1.080792020368 |
| H | -0.321157145395 | 1.173626007960  | -1.831046863507 |
| H | -0.270576985075 | 2.203614208312  | -0.368846940730 |
| O | 1.262109849097  | 2.512756172292  | -1.750088459008 |
| H | 2.644372405595  | 1.578138580357  | -2.569889205893 |
| O | 1.081770751441  | -0.305842043177 | -3.573829080080 |
| P | 2.370912868253  | 0.166902422081  | -4.203038102964 |
| S | 0.617745533711  | 3.679434555352  | -2.771440147918 |
| O | -0.700669424696 | 3.177630005321  | -3.195185688087 |
| O | 1.638808393234  | 3.701006827603  | -3.850842515665 |
| O | 0.586684174701  | 4.910168127885  | -1.963863629056 |
| O | 3.249022960900  | 0.998997195559  | -3.080924506990 |
| O | 3.304553804364  | -0.814509812939 | -4.855551490794 |
| O | 2.048624003801  | 1.351199387168  | -5.303950291616 |
| H | 1.840664268971  | 2.196139348858  | -4.841043745764 |

### Int3b

Electronic Energy = -2602.86136214 / Gibbs Free Energy = -2602.6248202

|   |                 |                 |                |
|---|-----------------|-----------------|----------------|
| C | -4.714653025801 | -2.791679147741 | 4.231045222116 |
| H | -4.055849213518 | -3.370673775628 | 4.891485174453 |
| H | -4.379123259148 | -1.747297595645 | 4.281967780116 |

|   |                 |                 |                 |
|---|-----------------|-----------------|-----------------|
| C | -6.169047215689 | -2.895403628589 | 4.728871360629  |
| H | -6.488002929517 | -3.945241226826 | 4.685191197711  |
| H | -6.822429233646 | -2.338615057728 | 4.043721391648  |
| C | -6.336160600825 | -2.366280905265 | 6.135824201259  |
| C | -6.634480124925 | -1.014821311172 | 6.363835838781  |
| C | -6.147841300760 | -3.202526145020 | 7.246010840424  |
| C | -6.742918705070 | -0.511514895244 | 7.662448484004  |
| H | -6.785250321501 | -0.352793099100 | 5.513587493219  |
| C | -6.255113666456 | -2.704994108837 | 8.546990018033  |
| H | -5.916992675664 | -4.253740765225 | 7.086549138654  |
| C | -6.553492509829 | -1.356033740830 | 8.760052373514  |
| H | -6.978764267808 | 0.538410256502  | 7.816957243471  |
| H | -6.109089115322 | -3.370987074919 | 9.393665339509  |
| H | -6.640495077750 | -0.967479207966 | 9.771241007150  |
| C | -4.547911260566 | -3.302335152734 | 2.798302710571  |
| H | -4.891587070317 | -4.344756091570 | 2.727928780362  |
| H | -5.177534282750 | -2.712611705294 | 2.118276773513  |
| O | -3.212887570387 | -3.177139223218 | 2.332015939848  |
| H | -2.673163237824 | -3.835241178419 | 2.831101185236  |
| C | -1.219656539380 | -8.200806528689 | 2.137683657224  |
| C | 0.098392470426  | -8.816719705392 | 2.523695757883  |
| O | 0.867763675548  | -9.299039750572 | 1.533025651665  |
| H | 0.528314851185  | -9.008120356560 | 0.668112201315  |
| O | 0.470257831492  | -8.937129285109 | 3.679931497061  |
| O | -1.762724318865 | -7.332108237679 | 3.033162928103  |
| C | -1.899814547723 | -8.603545229801 | 1.055697955603  |
| H | -2.865834116022 | -8.173530073703 | 0.827319608828  |
| H | -1.529619886922 | -9.388671216577 | 0.405752164146  |
| P | -0.849682958368 | -6.038910929193 | 3.644383042256  |
| O | 0.326337765592  | -5.860949472532 | 2.733136956549  |
| O | -1.832052278449 | -4.939814176444 | 3.931729601527  |
| O | -0.423789472297 | -6.677825358608 | 5.085004844236  |
| H | -0.035546631639 | -7.561719399400 | 4.906659187494  |
| P | -4.883649965199 | -7.377983261904 | -1.713633049527 |
| S | -3.493822251651 | -5.324202930513 | -0.142362727193 |
| O | -4.718534829628 | -8.420758119192 | -2.743169168338 |
| O | -5.431985117934 | -7.967215238156 | -0.325537813956 |
| H | -5.181968123291 | -7.371443357495 | 0.422646392655  |
| O | -4.106218636594 | -5.988030267425 | 1.026570019463  |
| O | -2.073571927544 | -5.021686062622 | -0.081275617695 |
| O | -4.365216448467 | -4.316395608394 | -0.785611729097 |
| O | -3.504003709332 | -6.620996805550 | -1.326061437512 |
| O | -5.876524726190 | -6.197703569543 | -2.156834399373 |
| H | -5.585417354777 | -5.329219373040 | -1.784501462335 |

### TS3

Electronic Energy = -2602.84901783 / Gibbs Free Energy = -2602.60982884

|   |                 |                 |                |
|---|-----------------|-----------------|----------------|
| C | -4.954361440444 | -3.194750793064 | 4.206215991623 |
| H | -4.135514913252 | -3.487600934638 | 4.874567022726 |
| H | -4.754562784664 | -2.166628134980 | 3.880012977831 |
| C | -6.292191411370 | -3.250753398660 | 4.968842445295 |
| H | -6.478777377760 | -4.284152778213 | 5.289063357191 |
| H | -7.107727777858 | -2.977540057806 | 4.286911500111 |
| C | -6.297204244296 | -2.331534178732 | 6.170477881685 |
| C | -6.776158664718 | -1.017742016611 | 6.069285684776 |
| C | -5.777548047890 | -2.759656809321 | 7.400973533495 |
| C | -6.739488117731 | -0.153803349938 | 7.166750769047 |
| H | -7.183423128709 | -0.670798135927 | 5.121971319812 |
| C | -5.738197128934 | -1.900219301545 | 8.501209480903 |
| H | -5.402984627350 | -3.776715202391 | 7.495637375668 |
| C | -6.219888832210 | -0.592738458126 | 8.387642953052 |
| H | -7.119204573114 | 0.860010925172  | 7.068871643939 |
| H | -5.335000664839 | -2.252118680254 | 9.447337337424 |
| H | -6.192859600054 | 0.076609005314  | 9.243323352213 |

|   |                 |                 |                 |
|---|-----------------|-----------------|-----------------|
| C | -4.952389486644 | -4.114862689086 | 2.990532995378  |
| H | -5.143609203642 | -5.155170579764 | 3.281894710510  |
| H | -5.718372384781 | -3.816198815787 | 2.268175741187  |
| O | -3.695311266560 | -4.031949703212 | 2.300050649124  |
| H | -2.994237734749 | -4.465027974296 | 2.898544439634  |
| C | -0.972686407047 | -8.084431011482 | 1.850101712276  |
| C | 0.266197185151  | -8.741239724292 | 2.393459635967  |
| O | 1.211011666368  | -9.108985586760 | 1.511498194296  |
| H | 1.028280945500  | -8.724403772546 | 0.636020190256  |
| O | 0.433365973117  | -8.987901481007 | 3.577841981182  |
| O | -1.699676434384 | -7.348490575576 | 2.739204272248  |
| C | -1.428899182505 | -8.341184926553 | 0.616848594727  |
| H | -2.341893919006 | -7.892144600532 | 0.246386666888  |
| H | -0.912973186949 | -9.032689157501 | -0.041115291122 |
| P | -0.988535578770 | -6.151345299094 | 3.686017937929  |
| O | 0.308350573835  | -5.760340538120 | 3.050111574155  |
| O | -2.081793921284 | -5.148546190966 | 3.968067832733  |
| O | -0.783506048849 | -6.978166398333 | 5.075085015021  |
| H | -0.330458876081 | -7.819610366028 | 4.846500641384  |
| P | -4.702733647546 | -7.212736422576 | -1.961669377384 |
| S | -3.622565895477 | -5.230194479927 | 0.472546899211  |
| O | -4.664721002101 | -7.996460200075 | -3.230169888903 |
| O | -5.221091141320 | -8.196051151446 | -0.760462010867 |
| H | -4.989045686758 | -7.779222964950 | 0.094745584807  |
| O | -4.215111312369 | -6.379047304019 | 1.159623284334  |
| O | -2.186722242027 | -5.036214780484 | 0.426654711344  |
| O | -4.524940674686 | -4.302222089492 | -0.214060932766 |
| O | -3.443755188858 | -6.500290988836 | -1.452860810924 |
| O | -5.876403357970 | -6.071111480109 | -2.063657921761 |
| H | -5.607563402570 | -5.293154840458 | -1.533667030068 |

### Int3c

Electronic Energy = -2602.87333713 / Gibbs Free Energy = -2602.63505595

|   |                 |                 |                 |
|---|-----------------|-----------------|-----------------|
| C | -5.075282817281 | -3.220402571873 | 4.165151571302  |
| H | -4.331942737097 | -3.649904009295 | 4.847799264388  |
| H | -4.725413844831 | -2.217333917652 | 3.893901161515  |
| C | -6.436581830637 | -3.122254628135 | 4.881130645563  |
| H | -6.782200131888 | -4.131800371970 | 5.137234718370  |
| H | -7.176369403286 | -2.697358962634 | 4.190903169802  |
| C | -6.348876726440 | -2.274070290002 | 6.131235032041  |
| C | -6.546468339576 | -0.887157078424 | 6.071754648623  |
| C | -6.016998279399 | -2.850106816393 | 7.365772697484  |
| C | -6.417272862967 | -0.095095070663 | 7.215128053982  |
| H | -6.804819768643 | -0.426098652561 | 5.120822672426  |
| C | -5.886811406230 | -2.062632788737 | 8.512223290557  |
| H | -5.860941030361 | -3.925028686257 | 7.427405815715  |
| C | -6.086613397677 | -0.681069443634 | 8.440321713924  |
| H | -6.577634157109 | 0.977983846425  | 7.149792581239  |
| H | -5.632486827128 | -2.527952560491 | 9.461038932343  |
| H | -5.988137299510 | -0.067017507603 | 9.331474248124  |
| C | -5.161861128167 | -4.076965464869 | 2.912153570182  |
| H | -5.461324416757 | -5.104429330945 | 3.143214979293  |
| H | -5.864377524677 | -3.654914342080 | 2.185458267879  |
| O | -3.839503745235 | -4.098318773882 | 2.311403751315  |
| H | -2.685767803949 | -4.797415951287 | 3.376994683208  |
| C | -0.934496378289 | -8.022236197852 | 1.771718445904  |
| C | 0.239610961794  | -8.785952703881 | 2.304252033623  |
| O | 1.042986432955  | -9.418361613269 | 1.439836602696  |
| H | 0.824683002931  | -9.207078636192 | 0.516014318560  |
| O | 0.489269784582  | -8.862147650448 | 3.499454819498  |
| O | -1.635745512267 | -7.315706638974 | 2.730816785408  |
| C | -1.396373132974 | -8.090777124376 | 0.520169555423  |
| H | -2.261933833565 | -7.526062921280 | 0.197366714966  |
| H | -0.936743491874 | -8.731415794148 | -0.225175740303 |

|   |                 |                 |                 |
|---|-----------------|-----------------|-----------------|
| P | -0.959176064664 | -6.148134475875 | 3.656164240712  |
| O | 0.192432491792  | -5.483071956410 | 3.005584839795  |
| O | -2.204138284607 | -5.280940840040 | 4.102265325159  |
| O | -0.661664991445 | -6.898312471483 | 5.039761859626  |
| H | -0.204408425739 | -7.742038060514 | 4.810494859845  |
| P | -4.602497143767 | -7.391139288447 | -2.100834204835 |
| S | -3.690882767016 | -4.983948409409 | 0.879730573777  |
| O | -5.091083430638 | -8.260539462068 | -3.222841295575 |
| O | -5.007134383311 | -8.155783889015 | -0.699515346678 |
| H | -4.726201613519 | -7.592081376572 | 0.054332208359  |
| O | -4.238182408337 | -6.312562525600 | 1.233476008514  |
| O | -2.242150578377 | -4.907893414977 | 0.690511272663  |
| O | -4.513618532803 | -4.254871139822 | -0.111873808539 |
| O | -3.160860284854 | -6.947542292673 | -2.020350457892 |
| O | -5.566740271514 | -6.052717716653 | -2.062766825196 |
| H | -5.184631970721 | -5.379318560711 | -1.459093263971 |

#### Int4a

Electronic Energy = -2035.11012456 / Gibbs Free Energy = -2034.89051447

|   |                 |                 |                 |
|---|-----------------|-----------------|-----------------|
| O | -0.323941856081 | 0.276416010447  | 0.944547191434  |
| P | -0.245900473791 | -1.349281930407 | 0.923773009089  |
| S | -1.511836524173 | 1.212753998604  | 0.087974470233  |
| O | -2.746887308392 | 0.439678306985  | 0.276724132594  |
| O | -0.990373048267 | 1.260212426309  | -1.282887538069 |
| O | -1.439646843094 | 2.477457796811  | 0.832525205297  |
| O | 0.962199336514  | -1.772091431402 | 1.671103067683  |
| O | -1.586872266443 | -1.894087210782 | 1.591572716456  |
| O | -0.251092503869 | -1.810410800380 | -0.587462051226 |
| H | -1.147062269698 | -1.786986593600 | -1.091370244768 |
| C | -5.637029795223 | 1.850714550939  | -0.481015999679 |
| H | -5.205096177415 | 0.851713823030  | -0.370601491825 |
| H | -5.133629588721 | 2.485390768015  | 0.259439727019  |
| C | -7.149374932205 | 1.807965175401  | -0.196362650554 |
| H | -7.651821311897 | 1.236475022141  | -0.988257505005 |
| H | -7.555763234798 | 2.828087694737  | -0.241202428735 |
| C | -7.459328568405 | 1.187453727467  | 1.148750620373  |
| C | -7.204037860904 | 1.891050866558  | 2.335924818012  |
| C | -7.961791975555 | -0.117476785928 | 1.246327978236  |
| C | -7.438078231272 | 1.306909674297  | 3.582210525148  |
| H | -6.815740128108 | 2.905803674627  | 2.279361726110  |
| C | -8.197356482269 | -0.708313545293 | 2.491098828642  |
| H | -8.172224209967 | -0.676669227261 | 0.337866845175  |
| C | -7.934751485562 | 0.002041514575  | 3.664837693320  |
| H | -7.234032327417 | 1.870041745475  | 4.489415723925  |
| H | -8.586886600350 | -1.721969413419 | 2.541992909190  |
| H | -8.116799522659 | -0.454184338749 | 4.634225919032  |
| C | -5.310881126830 | 2.361125424574  | -1.885450281311 |
| H | -5.862480025275 | 1.759709448183  | -2.626912529712 |
| H | -5.645481188573 | 3.401264069733  | -1.997735550514 |
| O | -3.917971762516 | 2.346140993299  | -2.163802391729 |
| H | -3.665724111858 | 1.399732826152  | -2.199740926123 |
| C | -3.488229473088 | -1.305164813850 | -1.881497573714 |
| O | -4.045674095750 | -0.425870360276 | -2.572575003561 |
| O | -2.328731585076 | -1.787005520476 | -2.025619146004 |
| H | -2.395749220273 | -1.886940896988 | 1.005376845127  |
| C | -4.367686557695 | -1.923125879473 | -0.764015935686 |
| C | -5.829972566313 | -2.098217333211 | -1.081692680999 |
| H | -5.936704255090 | -2.800400321452 | -1.918829914558 |
| H | -6.370260256945 | -2.472709041929 | -0.210057331618 |
| H | -6.246994358057 | -1.145171721508 | -1.417344861018 |
| O | -3.911636766706 | -2.256561625731 | 0.325159938234  |

#### TS4

Electronic Energy = -2035.08000571 / Gibbs Free Energy = -2034.85769271

|   |                 |                 |                 |
|---|-----------------|-----------------|-----------------|
| O | 0.153792810290  | 0.360727880760  | 0.874670911614  |
| P | 0.277409778772  | -1.150398926547 | 0.836307220880  |
| S | -1.956615476741 | 1.408258524617  | -0.552727782750 |
| O | -2.632570398025 | 0.407962961280  | 0.256477915100  |
| O | -1.126410162423 | 1.023182542776  | -1.676888716671 |
| O | -1.816483534864 | 2.749391330308  | 0.000599575027  |
| O | 1.546610858946  | -1.775831574804 | 1.347509183309  |
| O | -0.972891692162 | -1.843072180578 | 1.650776077627  |
| O | 0.040382063714  | -1.719430926467 | -0.682624091101 |
| H | -0.867497641794 | -1.568205323009 | -1.037328254563 |
| C | -5.480765763807 | 1.699885526190  | -0.206259899262 |
| H | -5.734724381435 | 0.736933468263  | -0.659699578398 |
| H | -4.842062757982 | 1.483273293420  | 0.654929268338  |
| C | -6.765674739546 | 2.408147162897  | 0.257433291454  |
| H | -7.387448976869 | 2.639058312017  | -0.618307318815 |
| H | -6.514856528787 | 3.365288877596  | 0.731391721920  |
| C | -7.539718533853 | 1.535411976235  | 1.222104406062  |
| C | -7.494506481327 | 1.759729097628  | 2.603969657632  |
| C | -8.272853971260 | 0.436549205996  | 0.746683599874  |
| C | -8.163538237835 | 0.910831640458  | 3.490755405622  |
| H | -6.929131681425 | 2.605794313853  | 2.988553155633  |
| C | -8.940425143264 | -0.415958157427 | 1.628074676438  |
| H | -8.319303414385 | 0.250707123343  | -0.324491561228 |
| C | -8.887516481778 | -0.180958290913 | 3.005761583946  |
| H | -8.117620535884 | 1.103143249439  | 4.559625459351  |
| H | -9.503469787870 | -1.260978555440 | 1.240210461038  |
| H | -9.407492040893 | -0.842142922576 | 3.693709100792  |
| C | -4.701834467267 | 2.518210417063  | -1.229951201573 |
| H | -5.343616392752 | 2.811135320023  | -2.069696862511 |
| H | -4.273396088930 | 3.423522661863  | -0.792173689574 |
| O | -3.581480160363 | 1.794529222541  | -1.800256997224 |
| H | -3.880027961461 | 0.842350937280  | -2.050017848282 |
| C | -3.597479557873 | -1.477815072027 | -1.572835147967 |
| O | -4.384351535668 | -0.633574556430 | -2.112576869351 |
| O | -2.436879745261 | -1.771846732899 | -1.912982068545 |
| H | -1.804976984039 | -1.860736599674 | 1.128836210505  |
| C | -4.199880134746 | -2.189479894642 | -0.335669876690 |
| C | -5.688782508641 | -2.440117291418 | -0.325554838114 |
| H | -6.055180044544 | -2.710295580921 | -1.320138193909 |
| H | -5.932062675099 | -3.216622774545 | 0.404151231512  |
| H | -6.201168747541 | -1.514304704977 | -0.034458851964 |
| O | -3.498661508487 | -2.489044061509 | 0.622165470017  |

#### Int4b

Electronic Energy = -2035.11275123 / Gibbs Free Energy = -2034.88953015

|   |                 |                 |                 |
|---|-----------------|-----------------|-----------------|
| O | 0.557930394771  | -0.252927600308 | 1.668925950892  |
| P | 0.077286513047  | -1.381996513312 | 0.791222936869  |
| S | -2.356592307725 | 1.881056093410  | -0.471385600967 |
| O | -2.629615850308 | 1.098358875160  | 0.756256883765  |
| O | -1.185561524007 | 1.409978522572  | -1.236772063510 |
| O | -2.455049164060 | 3.334860551542  | -0.296099560624 |
| O | 0.631087720230  | -2.770149582400 | 0.943378102427  |
| O | -1.566085578287 | -1.504016288366 | 0.9332726663136 |
| O | 0.251844121411  | -0.970535356659 | -0.789725490043 |
| H | -0.277735918497 | -0.169862355608 | -0.996245523720 |
| C | -5.664407415214 | 1.673254511947  | -0.154060655835 |
| H | -5.787921416815 | 0.584510286050  | -0.198246657991 |
| H | -5.102035759069 | 1.892199731452  | 0.759078312730  |
| C | -7.047607468514 | 2.349460670946  | -0.090844136188 |
| H | -7.600404745743 | 2.130806362388  | -1.013676155708 |
| H | -6.914179999920 | 3.438279206066  | -0.050727770337 |
| C | -7.844506064269 | 1.884087534091  | 1.108064878501  |
| C | -7.708694831654 | 2.522095652696  | 2.349344684902  |
| C | -8.697636332466 | 0.775253249922  | 1.016347669690  |

|   |                  |                 |                 |
|---|------------------|-----------------|-----------------|
| C | -8.407165399804  | 2.066448672623  | 3.469831991113  |
| H | -7.050808752625  | 3.384290504612  | 2.435918569963  |
| C | -9.398614301338  | 0.315364913182  | 2.133868152862  |
| H | -8.814266804449  | 0.270309035055  | 0.059703786776  |
| C | -9.255496678080  | 0.960304703097  | 3.365549441791  |
| H | -8.291332546726  | 2.576517732522  | 4.422666396594  |
| H | -10.058006293657 | -0.543853914935 | 2.041773644459  |
| H | -9.801817670983  | 0.605885886974  | 4.235504596211  |
| C | -4.877457567625  | 2.146524343833  | -1.371523585051 |
| H | -5.412965748998  | 1.917380793887  | -2.297374752676 |
| H | -4.688767752930  | 3.223425042913  | -1.334985184655 |
| O | -3.603839474904  | 1.461833257360  | -1.533689103652 |
| H | -3.845446823703  | -0.288080687773 | -1.318858757918 |
| C | -3.021453837119  | -2.000179771846 | -1.494999576050 |
| O | -3.936326894560  | -1.200344123480 | -0.939419430686 |
| O | -2.328050414552  | -1.710336027899 | -2.446397423555 |
| H | -1.982453060876  | -0.612972404290 | 0.911581434036  |
| C | -2.959492079006  | -3.382309596515 | -0.801217276869 |
| C | -3.888684412475  | -3.629497041480 | 0.356382726588  |
| H | -4.926892412052  | -3.441210076776 | 0.061395079284  |
| H | -3.774413873759  | -4.657528107960 | 0.706679640131  |
| H | -3.641124707109  | -2.925742298098 | 1.156874878070  |
| O | -2.171830422401  | -4.201802121651 | -1.230706370377 |

#### Int5a

Electronic Energy = -1985.57507104 / Gibbs Free Energy = -1985.2096902

|   |                 |                 |                 |
|---|-----------------|-----------------|-----------------|
| O | 0.906494463368  | -2.295142163051 | -1.730168986440 |
| P | 2.190409953906  | -1.735882981090 | -2.556000413650 |
| S | -0.277312790154 | -1.176382158971 | -1.082988920468 |
| O | -1.244242581229 | -2.077005432957 | -0.471488426339 |
| O | -0.716478031575 | -0.472084582685 | -2.303810408198 |
| O | 0.549719177089  | -0.377416516308 | -0.154924610000 |
| O | 2.890868055917  | -0.693052028239 | -1.559168733525 |
| O | 3.103135425610  | -2.797833876826 | -3.017149682786 |
| O | 1.558367699798  | -0.887779505867 | -3.762389583166 |
| H | 0.664995265677  | -0.545666757541 | -3.510518710156 |
| C | -4.196734114293 | 2.690456495605  | 0.296572595561  |
| H | -4.092288601408 | 3.279040497183  | -0.622256004442 |
| H | -4.853185095464 | 1.845119779919  | 0.053269784849  |
| C | -4.845488969752 | 3.565226109375  | 1.384908784541  |
| H | -4.147799268632 | 4.368036604679  | 1.659123746165  |
| H | -5.004875623330 | 2.963125287589  | 2.288829063018  |
| C | -6.153710825290 | 4.165705021576  | 0.921042600261  |
| C | -7.370018573023 | 3.501567289259  | 1.133446853122  |
| C | -6.170373429751 | 5.377514254294  | 0.213867856722  |
| C | -8.570764734598 | 4.031405299533  | 0.654012181076  |
| H | -7.374508053310 | 2.561244428228  | 1.680686440400  |
| C | -7.367596306190 | 5.911688674768  | -0.267758463438 |
| H | -5.234970543318 | 5.906308416068  | 0.042167474621  |
| C | -8.573752075807 | 5.239434512503  | -0.048984966426 |
| H | -9.503613336294 | 3.502564914884  | 0.832352655729  |
| H | -7.359191513199 | 6.853508927598  | -0.810543166156 |
| H | -9.506931315600 | 5.654378345981  | -0.420408668094 |
| C | -2.819013508442 | 2.158332923038  | 0.700521914096  |
| H | -2.187120125752 | 2.994579026165  | 1.046874614521  |
| H | -2.919594531604 | 1.469874001373  | 1.549361871334  |
| O | -2.187544378021 | 1.438582485149  | -0.344169040493 |
| H | -1.935030474595 | 2.085125457708  | -1.052749789792 |
| N | -1.537058076339 | 3.276759139690  | -2.498601330662 |
| C | -2.715918640575 | 3.172517920800  | -3.388624366168 |
| H | -3.488383874200 | 3.838649791281  | -2.994095671647 |
| H | -2.463098505599 | 3.549745323308  | -4.396976279793 |
| C | -3.304954578177 | 1.763027827854  | -3.483851454489 |
| H | -3.553016948420 | 1.383393498608  | -2.488959196179 |

|   |                 |                 |                 |
|---|-----------------|-----------------|-----------------|
| H | -4.217216253249 | 1.790424700744  | -4.090556411091 |
| H | -2.615948783531 | 1.051762110631  | -3.948614916521 |
| C | -1.247493091229 | 4.696026334423  | -2.195857029809 |
| H | -0.244705886370 | 4.746923322263  | -1.764987486598 |
| H | -1.214716319777 | 5.279539155940  | -3.134598652712 |
| C | -2.215858606473 | 5.352979607792  | -1.211191115401 |
| H | -2.204681469977 | 4.833730697920  | -0.248380599885 |
| H | -1.911219549318 | 6.391692668682  | -1.040462370596 |
| H | -3.247372992337 | 5.371093283468  | -1.576853517715 |
| C | -0.355622561534 | 2.640776760525  | -3.126625615419 |
| H | -0.675938155059 | 1.676465271416  | -3.521319367197 |
| H | -0.011293399970 | 3.247073805268  | -3.984916287450 |
| C | 0.794219413642  | 2.385854607747  | -2.151350331318 |
| H | 1.561943173597  | 1.776794041415  | -2.642000123287 |
| H | 1.275684730953  | 3.308203572973  | -1.809725178962 |
| H | 0.432095270810  | 1.830995599065  | -1.283376160818 |
| H | 2.240465957699  | -0.343144161680 | -0.900867396286 |

### TSS

Electronic Energy = -1985.56328217 / Gibbs Free Energy = -1985.19762162

|   |                 |                 |                 |
|---|-----------------|-----------------|-----------------|
| O | 0.773775394420  | -2.108021619431 | -1.227138846058 |
| P | 2.116122144209  | -1.773457081719 | -1.880183429135 |
| S | -0.874289631691 | -0.395085708807 | -1.198274880599 |
| O | -1.776484815235 | -1.295789028130 | -0.506069599928 |
| O | -0.812035349691 | -0.388382244486 | -2.659133153215 |
| O | 0.064508906320  | 0.423911237091  | -0.425704602648 |
| O | 2.699924207776  | -0.438668296752 | -1.124586609100 |
| O | 3.205339786417  | -2.790697085633 | -1.953844912069 |
| O | 1.799792854124  | -1.243128283137 | -3.401609796592 |
| H | 0.886481207069  | -0.893256199766 | -3.423810934638 |
| C | -4.087856250794 | 2.351284969740  | -0.105432724916 |
| H | -4.024595501545 | 3.144462309387  | -0.858560323678 |
| H | -4.832875621310 | 1.632635251710  | -0.466748614024 |
| C | -4.545727222060 | 2.963636495333  | 1.231412003182  |
| H | -3.769563236501 | 3.651507942282  | 1.592798434421  |
| H | -4.641374918541 | 2.170129695802  | 1.982857254409  |
| C | -5.856299180451 | 3.704795432233  | 1.083126662497  |
| C | -7.076692153807 | 3.087466521605  | 1.388672064197  |
| C | -5.876022637227 | 5.014590783410  | 0.580699139150  |
| C | -8.287158281969 | 3.759966159683  | 1.199279336104  |
| H | -7.077678212535 | 2.071833009097  | 1.778421831925  |
| C | -7.082573040609 | 5.690584590734  | 0.388934948125  |
| H | -4.935811955840 | 5.506279433310  | 0.338938207280  |
| C | -8.293970382738 | 5.064211316173  | 0.698068918904  |
| H | -9.223443520822 | 3.265609909570  | 1.445178638729  |
| H | -7.077421272412 | 6.706364926863  | 0.002077537279  |
| H | -9.234049520263 | 5.589374407645  | 0.552041910413  |
| C | -2.738042580674 | 1.652948523247  | 0.012226562146  |
| H | -1.972816353870 | 2.314303289340  | 0.437889306098  |
| H | -2.815319669374 | 0.771242222334  | 0.654458036269  |
| O | -2.309054587277 | 1.181668165884  | -1.276751215775 |
| H | -1.905933568318 | 1.970140454947  | -1.839116165628 |
| N | -1.454325620812 | 3.140147403132  | -2.878883774816 |
| C | -2.716418028744 | 3.436502606270  | -3.608718294199 |
| H | -3.419287935735 | 3.859814647746  | -2.887935378333 |
| H | -2.527123784233 | 4.213439946530  | -4.368660425363 |
| C | -3.369813506932 | 2.214886969419  | -4.257984490737 |
| H | -3.471435958965 | 1.397806258477  | -3.537251727461 |
| H | -4.370281530354 | 2.491333081817  | -4.607244902315 |
| H | -2.807835937631 | 1.849553796017  | -5.121963912030 |
| C | -0.900955999746 | 4.374919001941  | -2.264241104953 |
| H | 0.022209823793  | 4.095348663729  | -1.753330513653 |
| H | -0.627820156938 | 5.085873365196  | -3.062736755176 |
| C | -1.809222810028 | 5.069941598558  | -1.249349674034 |



|   |                 |                |                 |
|---|-----------------|----------------|-----------------|
| H | -2.086806126167 | 4.396362215347 | -0.433369675199 |
| H | -1.262633483319 | 5.911583109868 | -0.810895236855 |
| H | -2.724389452019 | 5.471150385855 | -1.694129718817 |
| C | -0.459217220044 | 2.536641441824 | -3.811600629097 |
| H | -0.870147842914 | 1.580496086626 | -4.135427630874 |
| H | -0.363214525816 | 3.179672119563 | -4.702700484005 |
| C | 0.920003503036  | 2.286939303558 | -3.199181810515 |
| H | 1.469231276802  | 1.578714548318 | -3.827704063580 |
| H | 1.517495171635  | 3.200474550542 | -3.123567270302 |
| H | 0.835181266335  | 1.842616008603 | -2.205377784949 |
| H | 1.947056025477  | 0.043189035927 | -0.727229322242 |

### Int5b

Electronic Energy = -1985.60914888 / Gibbs Free Energy = -1985.2402816

|   |                 |                 |                 |
|---|-----------------|-----------------|-----------------|
| O | 1.335517792693  | -2.709438561452 | -1.443505248142 |
| P | 2.252296988568  | -1.718903949901 | -2.119823321684 |
| S | -1.299380458326 | -0.195332277848 | -1.007300043985 |
| O | -2.039163597932 | -1.304769172425 | -0.396452873144 |
| O | -1.053452288595 | -0.311529489460 | -2.459893890913 |
| O | -0.138063314497 | 0.286148955164  | -0.220993992169 |
| O | 2.428887732097  | -0.410490580880 | -1.135339768328 |
| O | 3.626261747669  | -2.104474356661 | -2.585600357501 |
| O | 1.468934308949  | -1.083919865250 | -3.426929013147 |
| H | 0.553106948917  | -0.850211605015 | -3.161387613966 |
| C | -4.122872895710 | 2.317707727313  | 0.052424548456  |
| H | -3.972761313373 | 3.082806095937  | -0.717996568577 |
| H | -4.880964143098 | 1.626379805830  | -0.332904710758 |
| C | -4.625456418982 | 2.992205844074  | 1.342588444448  |
| H | -3.843547915867 | 3.662453433674  | 1.723027057558  |
| H | -4.791098391459 | 2.228009612938  | 2.112018750933  |
| C | -5.898647084899 | 3.773678447593  | 1.102484099615  |
| C | -7.153967483762 | 3.203683758613  | 1.353795861561  |
| C | -5.845818276950 | 5.071924129861  | 0.573598137924  |
| C | -8.328683331630 | 3.911661879177  | 1.086127780700  |
| H | -7.210345222346 | 2.197768691903  | 1.764019625028  |
| C | -7.016711361769 | 5.783224681977  | 0.303577097796  |
| H | -4.877815266922 | 5.527907604861  | 0.375450062191  |
| C | -8.263510872814 | 5.204280575820  | 0.559467006421  |
| H | -9.293191632091 | 3.454511737808  | 1.291299011862  |
| H | -6.956238894834 | 6.789765641656  | -0.102183147711 |
| H | -9.175739566447 | 5.757396494946  | 0.352743834125  |
| C | -2.824628467554 | 1.559447201356  | 0.278668609669  |
| H | -2.051733736085 | 2.186035910170  | 0.738222181766  |
| H | -2.992138373575 | 0.686684986632  | 0.917481158861  |
| O | -2.349647615184 | 1.115776365940  | -1.018667152492 |
| H | -1.483870945861 | 2.388113965403  | -2.152671228003 |
| N | -1.262641548626 | 3.032904437659  | -2.933613637423 |
| C | -2.540264227061 | 3.147418704692  | -3.742818807898 |
| H | -3.281287614257 | 3.590976805009  | -3.077559293108 |
| H | -2.334380105491 | 3.856091158604  | -4.549415140805 |
| C | -3.050867561346 | 1.809662812981  | -4.268019339485 |
| H | -3.080736464921 | 1.061728288952  | -3.471902504673 |
| H | -4.067281987199 | 1.960909690640  | -4.643916784944 |
| H | -2.444237793297 | 1.425449340819  | -5.091431219535 |
| C | -0.844779378726 | 4.368107645045  | -2.351917089276 |
| H | 0.127942906072  | 4.210514603539  | -1.888771578363 |
| H | -0.716111189991 | 5.043741749781  | -3.201438271438 |
| C | -1.811872409113 | 4.930942935057  | -1.317670896033 |
| H | -1.938985667051 | 4.242908337255  | -0.477016667456 |
| H | -1.379376010783 | 5.855053430832  | -0.922457200356 |
| H | -2.792915030512 | 5.178509510988  | -1.730289795349 |
| C | -0.138415711707 | 2.393591031094  | -3.731025889529 |
| H | -0.523220397332 | 1.431005960080  | -4.057332310020 |
| H | 0.022394077678  | 3.032701998930  | -4.603129644282 |

|   |                |                 |                 |
|---|----------------|-----------------|-----------------|
| C | 1.131651579689 | 2.183724240916  | -2.914474743322 |
| H | 1.734136819212 | 1.418978493619  | -3.408999464798 |
| H | 1.727731706746 | 3.094788733932  | -2.816861942878 |
| H | 0.902248747294 | 1.792375216590  | -1.920193785948 |
| H | 1.560136810774 | -0.185143302671 | -0.737166314106 |

### Int6a

Electronic Energy = -2260.44276572 / Gibbs Free Energy = -2260.25684432

|   |                 |                 |                 |
|---|-----------------|-----------------|-----------------|
| C | -2.216647110223 | -1.444476041189 | -0.972851997617 |
| H | -2.749647426928 | -2.401307681984 | -0.954755380352 |
| H | -2.328889638164 | -0.988187252045 | 0.020083115211  |
| C | -2.848092747080 | -0.539704573417 | -2.047826690637 |
| H | -2.742768835765 | -1.038375378658 | -3.018665744730 |
| H | -2.286861849205 | 0.402835973550  | -2.106147423838 |
| C | -4.307197078008 | -0.248581188207 | -1.774831624112 |
| C | -4.711444025407 | 0.964287119615  | -1.199457842056 |
| C | -5.288111263631 | -1.212086544067 | -2.058517150727 |
| C | -6.057519307455 | 1.213611021986  | -0.915171129793 |
| H | -3.963771976525 | 1.722209611062  | -0.973877144404 |
| C | -6.632989918608 | -0.967771433132 | -1.773634568331 |
| H | -5.000931400654 | -2.162601645078 | -2.497444285320 |
| C | -7.024952694314 | 0.247021145038  | -1.201825843031 |
| H | -6.349303986618 | 2.162926482619  | -0.472497127730 |
| H | -7.375142736491 | -1.729443352120 | -2.000737185582 |
| H | -8.072376020386 | 0.438414986922  | -0.983078349565 |
| C | -0.733887370746 | -1.710414146553 | -1.241793962686 |
| H | -0.613061923004 | -2.100222777794 | -2.262860611304 |
| H | -0.171521066190 | -0.768634195685 | -1.186124481619 |
| O | -0.151825380037 | -2.591260761586 | -0.286973324190 |
| H | -0.518812172606 | -3.483529179200 | -0.472457561778 |
| O | -0.618491545398 | -4.355400830496 | -3.511016525449 |
| P | -0.349709440001 | -5.575341246275 | -2.291286532805 |
| O | -1.059236308803 | -6.852110916209 | -2.931757018077 |
| O | 1.127419389093  | -5.714908147173 | -2.271545697987 |
| O | -1.114483047330 | -5.081817668198 | -1.076470194966 |
| H | -2.751483071247 | -4.902454395648 | -0.826017051159 |
| S | -1.961195155469 | -3.976881767985 | -4.293678839708 |
| O | -1.739629262352 | -2.637233593767 | -4.812096001993 |
| O | -2.308287575481 | -5.039977811161 | -5.222028407016 |
| O | -3.051437632331 | -3.841347850392 | -3.151915454827 |
| P | -4.132963174287 | -5.048229735582 | -2.449086751765 |
| O | -3.739908811141 | -4.757752695311 | -0.922390901649 |
| O | -5.508175408241 | -4.576001460206 | -2.753476185704 |
| O | -3.626729546006 | -6.391846738174 | -2.908592310059 |
| H | -2.067527538802 | -6.761996391220 | -2.919087394295 |

### TS6

Electronic Energy = -2260.41553305 / Gibbs Free Energy = -2260.2369786

|   |                 |                 |                 |
|---|-----------------|-----------------|-----------------|
| C | -1.731106217116 | -1.557682338482 | -1.308453833104 |
| H | -2.261859923716 | -2.490669577313 | -1.516858136840 |
| H | -1.826625418915 | -1.350752478054 | -0.232306167693 |
| C | -2.389822840614 | -0.422231717829 | -2.113054614808 |
| H | -2.299336081192 | -0.658746610502 | -3.179065467825 |
| H | -1.852468189804 | 0.518037554316  | -1.931121210429 |
| C | -3.850789146827 | -0.261756403024 | -1.751180172765 |
| C | -4.264205440573 | 0.684529542302  | -0.803386491920 |
| C | -4.818069592490 | -1.103154741573 | -2.324133392219 |
| C | -5.608284208686 | 0.792585022996  | -0.433802031700 |
| H | -3.525599663615 | 1.343571292630  | -0.350925343983 |
| C | -6.160991381299 | -0.998713023871 | -1.956001738676 |
| H | -4.510086156073 | -1.839027238876 | -3.060008155497 |
| C | -6.562502519838 | -0.050697502097 | -1.008993227924 |
| H | -5.908843407940 | 1.535524651792  | 0.301082431491  |
| H | -6.896293226405 | -1.657719202866 | -2.411870897275 |

|   |                 |                 |                 |
|---|-----------------|-----------------|-----------------|
| H | -7.608353701525 | 0.031350579604  | -0.724321034523 |
| C | -0.260649752225 | -1.753741630994 | -1.657461626126 |
| H | -0.165474978528 | -1.952172257810 | -2.730271561619 |
| H | 0.312023404997  | -0.843392224905 | -1.423306441808 |
| O | 0.326856904070  | -2.853765532463 | -0.942536243182 |
| H | -0.353875552498 | -3.219021187055 | -0.352769873200 |
| O | -1.608750874108 | -3.752838278190 | -3.713314195959 |
| P | -0.264964949629 | -5.710974354707 | -1.077587944410 |
| O | -0.537709829705 | -6.266342993234 | -2.445520982874 |
| O | 1.050743447056  | -5.891369577485 | -0.418069468435 |
| O | -1.406187842077 | -5.046294337105 | -0.344450941692 |
| H | -2.792485887053 | -4.746144793573 | -1.127000898358 |
| S | -2.633383081523 | -3.569682513450 | -4.752177141938 |
| O | -2.994087443827 | -2.178094828969 | -5.057591060319 |
| O | -2.495310507183 | -4.444519036746 | -5.925777651984 |
| O | -4.088791065488 | -4.130269516308 | -4.010562146288 |
| P | -4.145845168429 | -5.259683650820 | -2.839554718319 |
| O | -3.702787694742 | -4.529804184608 | -1.500558886056 |
| O | -5.524589591562 | -5.802528753995 | -2.788328166425 |
| O | -3.058888753438 | -6.363930905915 | -3.185620566050 |
| H | -2.094030898553 | -6.180579934894 | -2.957920438227 |

### Int6b

Electronic Energy = -2260.43770976 / Gibbs Free Energy = -2260.26105014

|   |                 |                 |                 |
|---|-----------------|-----------------|-----------------|
| C | -3.073084231496 | -0.780857825379 | -1.010842712080 |
| H | -3.991169172632 | -1.332434888315 | -1.245624024150 |
| H | -3.085463777846 | -0.569875244143 | 0.065559161375  |
| C | -3.042785592722 | 0.544573370596  | -1.796508903565 |
| H | -3.019411293613 | 0.325102837773  | -2.871582711217 |
| H | -2.115309583771 | 1.081629909595  | -1.560632097522 |
| C | -4.238691089973 | 1.413904395870  | -1.473511971220 |
| C | -4.192919841600 | 2.330870197965  | -0.413734657534 |
| C | -5.434107787638 | 1.284208899924  | -2.194702650324 |
| C | -5.311190140235 | 3.100053032828  | -0.083035486176 |
| H | -3.272303768564 | 2.443082547222  | 0.154936130678  |
| C | -6.555214564142 | 2.050868439182  | -1.868057839552 |
| H | -5.484371174378 | 0.577153958487  | -3.020054356336 |
| C | -6.497193389040 | 2.962066487707  | -0.809635973267 |
| H | -5.255268097179 | 3.807972218824  | 0.739870360076  |
| H | -7.471982987579 | 1.938621953543  | -2.441136702423 |
| H | -7.367398485964 | 3.561170666903  | -0.555213907231 |
| C | -1.868475269031 | -1.647759437025 | -1.336449346826 |
| H | -1.847487364459 | -1.948026804736 | -2.385931326801 |
| H | -0.923699426856 | -1.154411498546 | -1.087829639968 |
| O | -1.946180319766 | -2.895818459089 | -0.583372444605 |
| H | -1.911256058129 | -2.663443086946 | 0.419338472816  |
| O | -0.379540526709 | -1.902765415960 | 6.367932822892  |
| P | -0.533118619684 | -4.142381403505 | -0.915758116371 |
| O | 0.662963285585  | -3.231447896216 | -0.652525357278 |
| O | -0.825732241361 | -4.536702139984 | -2.325258486245 |
| O | -0.885852904238 | -5.098467319286 | 0.217423616982  |
| H | -0.530752050678 | -4.707168804527 | 1.666320089769  |
| S | -1.250493185983 | -1.900002404466 | 5.189031156346  |
| O | -2.159032526197 | -3.046405192108 | 5.062304310605  |
| O | -1.812490859324 | -0.597594440304 | 4.816511877047  |
| O | -0.035795632240 | -2.177484422490 | 3.947148900792  |
| P | -0.347106163101 | -2.711768888998 | 2.477988745748  |
| O | -0.286435725544 | -4.292473197829 | 2.581976837002  |
| O | -1.640196366159 | -2.220151901056 | 1.871590604322  |
| O | 0.937093685617  | -2.214146182812 | 1.692157016047  |
| H | 0.908277802875  | -2.588458506426 | 0.727864809198  |

### TS6'

Electronic Energy = -2260.43748288 / Gibbs Free Energy = -2260.26313317

|   |                 |                 |                 |
|---|-----------------|-----------------|-----------------|
| C | -3.028816503787 | -0.838448573817 | -0.987949769482 |
| H | -3.951441316595 | -1.392592288547 | -1.197272073008 |
| H | -3.000536773123 | -0.647206385320 | 0.091520171091  |
| C | -3.038088166093 | 0.502247853266  | -1.748171530671 |
| H | -3.071100687746 | 0.306570253267  | -2.827411745979 |
| H | -2.098989656668 | 1.034141003981  | -1.548784505693 |
| C | -4.213790116834 | 1.364366105264  | -1.342419027095 |
| C | -4.121906866538 | 2.223597515413  | -0.237925899726 |
| C | -5.433740935454 | 1.285140160763  | -2.028448748867 |
| C | -5.219411015813 | 2.984319052415  | 0.171503817239  |
| H | -3.181380226981 | 2.296336927352  | 0.304064919346  |
| C | -6.534568429219 | 2.043977904857  | -1.623081145141 |
| H | -5.520069435872 | 0.624010340729  | -2.888156700257 |
| C | -6.430849713820 | 2.896520619620  | -0.520465745222 |
| H | -5.127767483688 | 3.646582648581  | 1.028498431978  |
| H | -7.471272817009 | 1.971265645260  | -2.169696059061 |
| H | -7.285263584255 | 3.489177625004  | -0.204807473684 |
| C | -1.830301373970 | -1.688857325390 | -1.373584521138 |
| H | -1.849689729303 | -1.983713399638 | -2.424541201996 |
| H | -0.882002995838 | -1.186187399530 | -1.159719872085 |
| O | -1.864259507039 | -2.939581499203 | -0.616609028896 |
| H | -1.840688198080 | -2.702132564445 | 0.412702391147  |
| O | -0.525129673150 | -1.643569778057 | 6.259083709060  |
| P | -0.473733209539 | -4.142301495845 | -0.940680177710 |
| O | 0.729451101986  | -3.209020610046 | -0.657997146517 |
| O | -0.692863750605 | -4.511338619705 | -2.367571564566 |
| O | -0.787127952843 | -5.114354248531 | 0.178830211968  |
| H | -0.571739932786 | -4.812427783386 | 1.787321417909  |
| S | -1.344769522096 | -1.724847138245 | 5.045412849928  |
| O | -2.308176185971 | -2.832490200569 | 5.000971491122  |
| O | -1.826533056957 | -0.442045852085 | 4.520302694355  |
| O | -0.099764378376 | -2.188744976420 | 3.902138359689  |
| P | -0.367629856506 | -2.799847444492 | 2.449256938063  |
| O | -0.422185476600 | -4.379807960969 | 2.690301138568  |
| O | -1.644855556611 | -2.300344332505 | 1.796750927064  |
| O | 0.923074775333  | -2.452010441808 | 1.651861578628  |
| H | 0.865367896042  | -2.804595048146 | 0.553672864812  |

### Int6c

Electronic Energy = -2260.45797362 / Gibbs Free Energy = -2260.27973443

|   |                 |                 |                 |
|---|-----------------|-----------------|-----------------|
| C | -2.937980426005 | -0.830367104232 | -1.038806367541 |
| H | -3.875532728214 | -1.395413813338 | -1.107698270033 |
| H | -2.809712705793 | -0.545528166719 | 0.013116276925  |
| C | -3.029103444231 | 0.440796519244  | -1.904579820783 |
| H | -3.146200630931 | 0.153052307064  | -2.957163325612 |
| H | -2.083782614237 | 0.993542737169  | -1.828848777638 |
| C | -4.179849487697 | 1.327802404281  | -1.482057455054 |
| C | -4.021630206864 | 2.258511576528  | -0.444846292711 |
| C | -5.440816495855 | 1.204189572249  | -2.082089635233 |
| C | -5.093498741306 | 3.045709319544  | -0.017982322065 |
| H | -3.048713914341 | 2.366551951493  | 0.030035529016  |
| C | -6.516349379111 | 1.989435172653  | -1.659297529000 |
| H | -5.579388966052 | 0.487151616508  | -2.888511554146 |
| C | -6.345983519697 | 2.913535696255  | -0.624780550818 |
| H | -4.950053334819 | 3.763531339540  | 0.785540042177  |
| H | -7.485571415488 | 1.881173147685  | -2.139390708654 |
| H | -7.180647195946 | 3.526853378887  | -0.295967000524 |
| C | -1.782914084880 | -1.723283983116 | -1.464071319671 |
| H | -1.905322213592 | -2.059893979480 | -2.499833395533 |
| H | -0.824414754679 | -1.196540866117 | -1.381640874983 |
| O | -1.756721463587 | -2.882625911492 | -0.600749731264 |
| H | -1.916340840622 | -2.428968678625 | 1.068279790730  |
| O | -0.443459197334 | -1.828366035997 | 6.374438566263  |
| P | -0.661628319526 | -4.100035635500 | -0.957419524847 |

|   |                 |                 |                 |
|---|-----------------|-----------------|-----------------|
| O | 0.747203439978  | -3.297764899921 | -0.907157803245 |
| O | -0.881480521634 | -4.607949855998 | -2.342136498894 |
| O | -0.797494512982 | -5.024596595858 | 0.241086148301  |
| H | -0.487232858750 | -4.627327173231 | 1.707973799023  |
| S | -1.334207263911 | -1.904432473902 | 5.212471366225  |
| O | -2.129163912702 | -3.131640843436 | 5.094798112149  |
| O | -2.024535730319 | -0.660008732503 | 4.858235810944  |
| O | -0.116361885270 | -2.045036200473 | 3.941384346611  |
| P | -0.302516215055 | -2.625016590201 | 2.472938882412  |
| O | -0.316032388888 | -4.202883776324 | 2.630293230697  |
| O | -1.772741445122 | -2.176628743086 | 2.021386343359  |
| O | 0.770940596125  | -2.121366578350 | 1.554273953118  |
| H | 0.868013062192  | -2.850856929808 | -0.026424050352 |

### Int7a

Electronic Energy = -2260.43540016 / Gibbs Free Energy = -2260.25488877

|   |                 |                 |                 |
|---|-----------------|-----------------|-----------------|
| C | -2.964027990533 | -1.295564787674 | -1.769634718932 |
| H | -3.803328026650 | -1.698690540500 | -1.190616782936 |
| H | -2.213065377243 | -0.976289582943 | -1.039400084541 |
| C | -3.434301227844 | -0.089826869004 | -2.602805652643 |
| H | -4.198206834560 | -0.414650836428 | -3.321573662087 |
| H | -2.588697684817 | 0.292218271720  | -3.191205382025 |
| C | -3.986607546736 | 1.013414171265  | -1.727466205021 |
| C | -3.122489910087 | 1.920653680916  | -1.095757879663 |
| C | -5.362055490734 | 1.121854714834  | -1.479390312916 |
| C | -3.617195242847 | 2.909534538316  | -0.243083551630 |
| H | -2.051889816696 | 1.847416618196  | -1.275432410890 |
| C | -5.863104569487 | 2.109202763824  | -0.626511623690 |
| H | -6.045966199084 | 0.425219986717  | -1.959749709081 |
| C | -4.991645811572 | 3.007565854912  | -0.005237320773 |
| H | -2.930771483753 | 3.604335166690  | 0.234267847638  |
| H | -6.933504532449 | 2.177468932762  | -0.449428295002 |
| H | -5.378930973415 | 3.777447552466  | 0.656837013935  |
| C | -2.373763987043 | -2.416342067810 | -2.627130133036 |
| H | -3.129961368610 | -2.758445392739 | -3.357186247407 |
| H | -1.523466237809 | -2.034636982441 | -3.208012693843 |
| O | -1.881584547140 | -3.502552217857 | -1.854080360059 |
| H | -2.626446794153 | -3.804665553036 | -1.286962952578 |
| O | -1.252190719039 | -1.958374369333 | 3.197140566212  |
| P | -2.193984426882 | -2.763336486969 | 4.437867053040  |
| O | -2.128451392851 | -4.236974921551 | 4.116416932004  |
| O | -1.637288795354 | -2.193084617512 | 5.690802051134  |
| O | -3.650427509297 | -2.166165150193 | 4.137849115711  |
| H | -4.143911769027 | -2.673474185866 | 3.423478861773  |
| S | -1.158459012407 | -2.362170407550 | 1.652147529505  |
| O | -0.716539045022 | -1.159123854044 | 0.967629883609  |
| O | -0.385608546199 | -3.582942344643 | 1.496160316936  |
| O | -2.677977071637 | -2.590185882757 | 1.260197628422  |
| P | -3.740816830152 | -3.985617024153 | 1.206643877621  |
| O | -4.813205190726 | -3.552574914165 | 2.172945339076  |
| O | -4.030556181138 | -4.208569474072 | -0.242718534410 |
| O | -2.827895815221 | -5.158445692596 | 1.777619493044  |
| H | -2.520407019327 | -4.929733942258 | 2.714285570173  |

### TS7

Electronic Energy = -2260.39062638 / Gibbs Free Energy = -2260.21487389

|   |                 |                 |                 |
|---|-----------------|-----------------|-----------------|
| C | -2.829311719038 | -0.966296348826 | -1.231086622333 |
| H | -3.770357707914 | -1.494613472375 | -1.045268308000 |
| H | -2.503550040537 | -0.548261506540 | -0.274316944897 |
| C | -3.061069110890 | 0.174977309599  | -2.240022436260 |
| H | -3.393460180122 | -0.247821020694 | -3.196673436292 |
| H | -2.110882325735 | 0.690034350653  | -2.430830502768 |
| C | -4.088550338262 | 1.159566978884  | -1.724670980252 |
| C | -3.701628498863 | 2.252142123783  | -0.935987206608 |

|   |                 |                 |                 |
|---|-----------------|-----------------|-----------------|
| C | -5.454063654328 | 0.965944953887  | -1.976768100063 |
| C | -4.653357497543 | 3.130836322304  | -0.412992622039 |
| H | -2.645533585286 | 2.414114941433  | -0.730993762427 |
| C | -6.409717941388 | 1.841726214735  | -1.456241874878 |
| H | -5.769324004806 | 0.121533529269  | -2.586014002228 |
| C | -6.011866495180 | 2.927958441056  | -0.671643627234 |
| H | -4.333952379828 | 3.973781034461  | 0.194344176691  |
| H | -7.463695911674 | 1.676760379477  | -1.664567715429 |
| H | -6.753764389997 | 3.611080457844  | -0.266901356077 |
| C | -1.787372195398 | -1.951357793306 | -1.745181513079 |
| H | -2.051548369184 | -2.340766088548 | -2.732942270349 |
| H | -0.790607908497 | -1.509630371630 | -1.794226715747 |
| O | -1.647163313757 | -3.142449776936 | -0.904575294487 |
| H | -2.604639306394 | -3.594385081994 | -0.739256959741 |
| O | -0.466566215282 | -2.617171866464 | 3.661150830391  |
| P | -1.620149069675 | -2.825784875952 | 4.619363630555  |
| O | -2.279536753693 | -4.311725488449 | 4.409399800753  |
| O | -1.423525770537 | -2.639655197623 | 6.095555868047  |
| O | -2.854625207024 | -1.830710876287 | 4.145957512752  |
| H | -2.786661839023 | -1.717169887679 | 3.179789581462  |
| S | -1.030935588360 | -2.872986716778 | 0.906866176108  |
| O | -0.070913203454 | -1.807583667133 | 0.693884545778  |
| O | -0.601703543829 | -4.237889318260 | 1.126107457401  |
| O | -2.354477714457 | -2.464884589725 | 1.444737106193  |
| P | -4.252721402738 | -3.810849534611 | 1.137568225975  |
| O | -5.219034399724 | -2.713767064566 | 1.406065078967  |
| O | -3.853178835526 | -4.103390996267 | -0.303988272709 |
| O | -3.862633465398 | -4.809296156300 | 2.181881312573  |
| H | -2.773155400891 | -4.401144609879 | 3.560079118925  |

### Int7b

Electronic Energy = -2260.4239871 / Gibbs Free Energy = -2260.2453447

|   |                 |                 |                 |
|---|-----------------|-----------------|-----------------|
| C | -2.692837405173 | -0.796187506396 | -1.184376864694 |
| H | -3.599567473478 | -1.407310008430 | -1.250790050959 |
| H | -2.548384528093 | -0.556981420827 | -0.126235736970 |
| C | -2.872318543724 | 0.510404148357  | -1.982431413108 |
| H | -3.033786679604 | 0.270024924864  | -3.040779405953 |
| H | -1.947332484390 | 1.098790323371  | -1.926132785623 |
| C | -4.032901412616 | 1.324914257423  | -1.453953802224 |
| C | -3.854318004743 | 2.210331599694  | -0.381394106116 |
| C | -5.319058533823 | 1.173498127325  | -1.990175943276 |
| C | -4.932193082996 | 2.927469656358  | 0.142394351853  |
| H | -2.861558675205 | 2.337473880644  | 0.045096717050  |
| C | -6.400455520395 | 1.889332543801  | -1.470493148427 |
| H | -5.473044247598 | 0.489579366847  | -2.822095437228 |
| C | -6.210180996795 | 2.769262164232  | -0.401552522153 |
| H | -4.773723700112 | 3.610899710514  | 0.972548907517  |
| H | -7.390053613023 | 1.760967721709  | -1.901415138919 |
| H | -7.049767909297 | 3.328046160785  | 0.003071152282  |
| C | -1.503795236686 | -1.589147811011 | -1.709042280312 |
| H | -1.585055798763 | -1.768085402095 | -2.782968027180 |
| H | -0.553180890719 | -1.090862710208 | -1.500836634483 |
| O | -1.433878888969 | -2.956551166788 | -1.174653612638 |
| H | -2.954107511665 | -5.486040975765 | 0.043514702979  |
| O | -0.728799058338 | -3.394729190040 | 4.081909045504  |
| P | -1.811225459559 | -2.524551773987 | 4.672551261954  |
| O | -3.208884389891 | -3.376637881159 | 4.773631831255  |
| O | -1.625421986079 | -1.828904355454 | 5.990672025483  |
| O | -2.189814461719 | -1.341779162537 | 3.574781778352  |
| H | -2.124999236274 | -1.706854194167 | 2.674655931238  |
| S | -1.108150174050 | -3.156256595481 | 0.385971448397  |
| O | -0.179993644606 | -2.132232480433 | 0.828375852988  |
| O | -0.793845028692 | -4.568944857297 | 0.516310300500  |
| O | -2.497716653340 | -2.827568027292 | 1.086264156463  |

|   |                 |                 |                 |
|---|-----------------|-----------------|-----------------|
| P | -3.916571459324 | -3.897505001579 | 1.162765678638  |
| O | -5.047095987462 | -2.976026985276 | 0.895357948918  |
| O | -3.651307784598 | -4.829426400957 | -0.135593276552 |
| O | -3.726598923498 | -4.681465436392 | 2.424334597304  |
| H | -3.371125135236 | -3.885678938762 | 3.940688793842  |

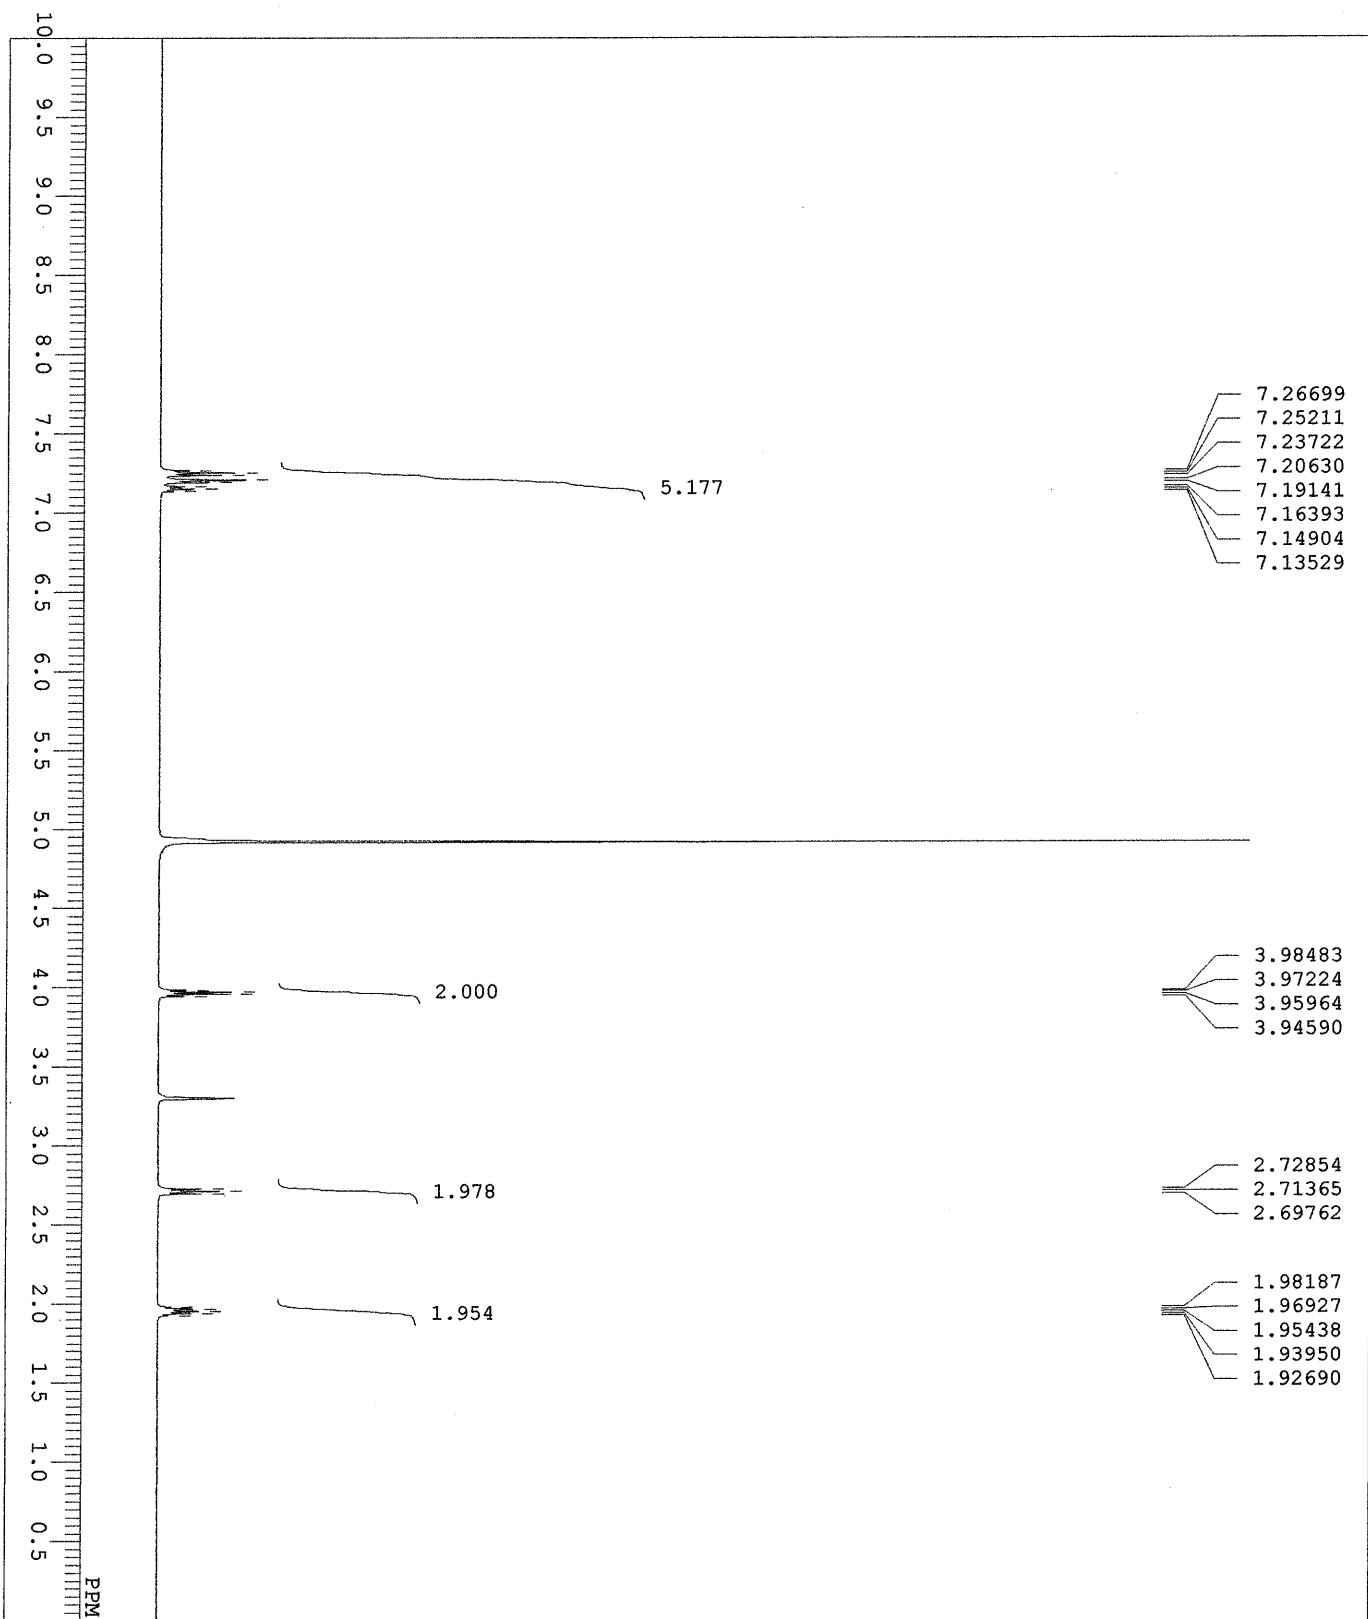

DFILE 18kd3414HPLC4-1-1.als  
 COMMENT  
 DATIM 2019-02-01 05:25:13  
 OBNUC 1H  
 EXMOD proton.jxp  
 OBFRO 500.16 MHz  
 OBSFT 2.41 KHZ  
 OBFIN 6.01 HZ  
 POINT 13107  
 FREQU 7507.51 HZ  
 SCANS 3  
 ACQTM 1.7459 sec  
 PD 6.0000 sec  
 PM1 5.55 usec  
 IRNUC 1H  
 CTEMP 21.3 C  
 SLVNT CD3OD  
 EXREF 3.30 ppm  
 BF 0.12 Hz  
 RGAIN 38

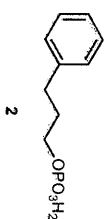



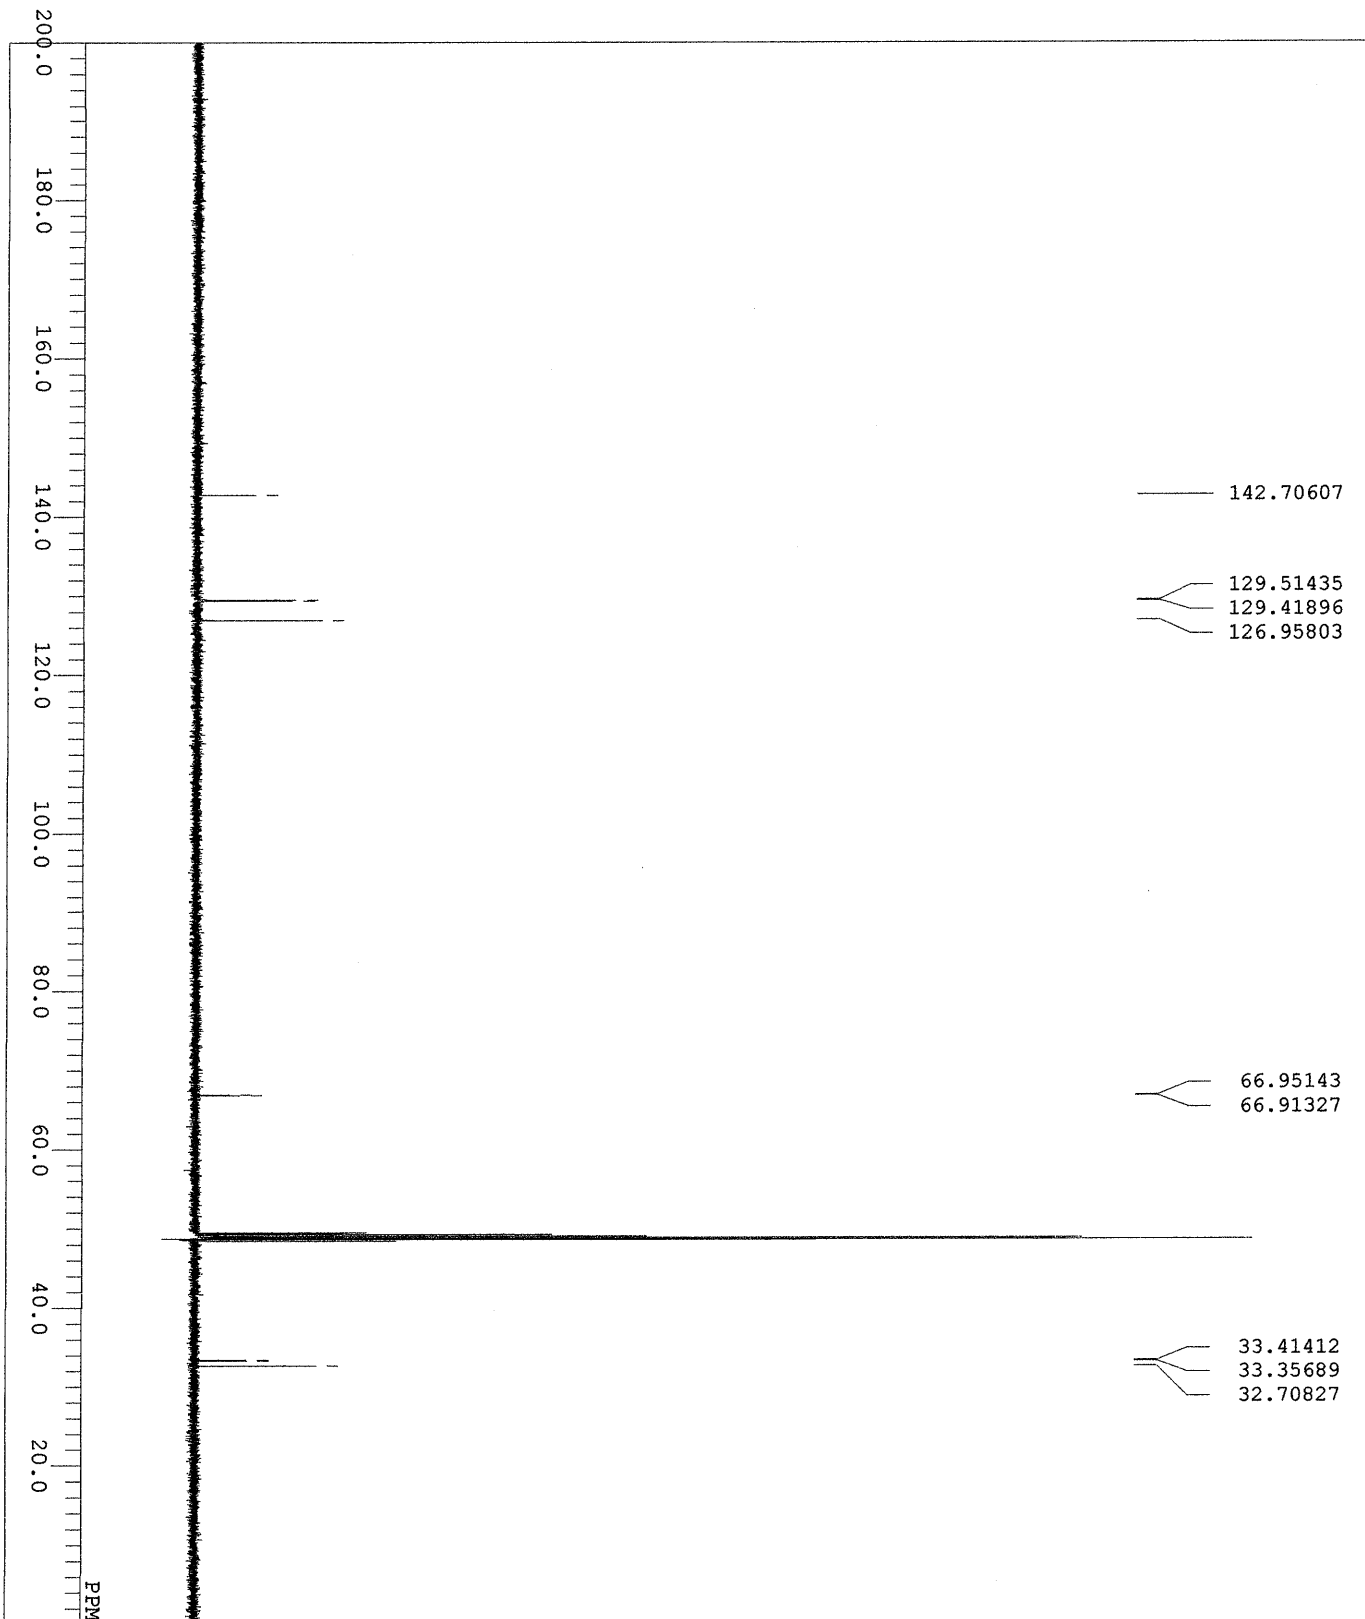

```

D:\FILE 18kd3414HPLC4_carbon-1-1.als
COMNT 2019-02-01 05:26:10
DATIM 13C
OBNUC 13C
EXMOD carbon.jxp
OBFRO 125.77 MHz
OBSET 7.87 KHz
OBFIN 4.21 Hz
POINT 26214
FREQU 31446.54 Hz
SCANS 324
ACQTM 0.8336 sec
PD 2.0000 sec
PWL 3.40 usec
IRNUC 1H
CTEMP 22.3 C
SLVNT CD3OD
EXREF 49.00 ppm
BF 0.12 Hz
RGAIN 60
    
```

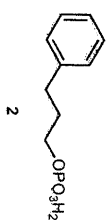

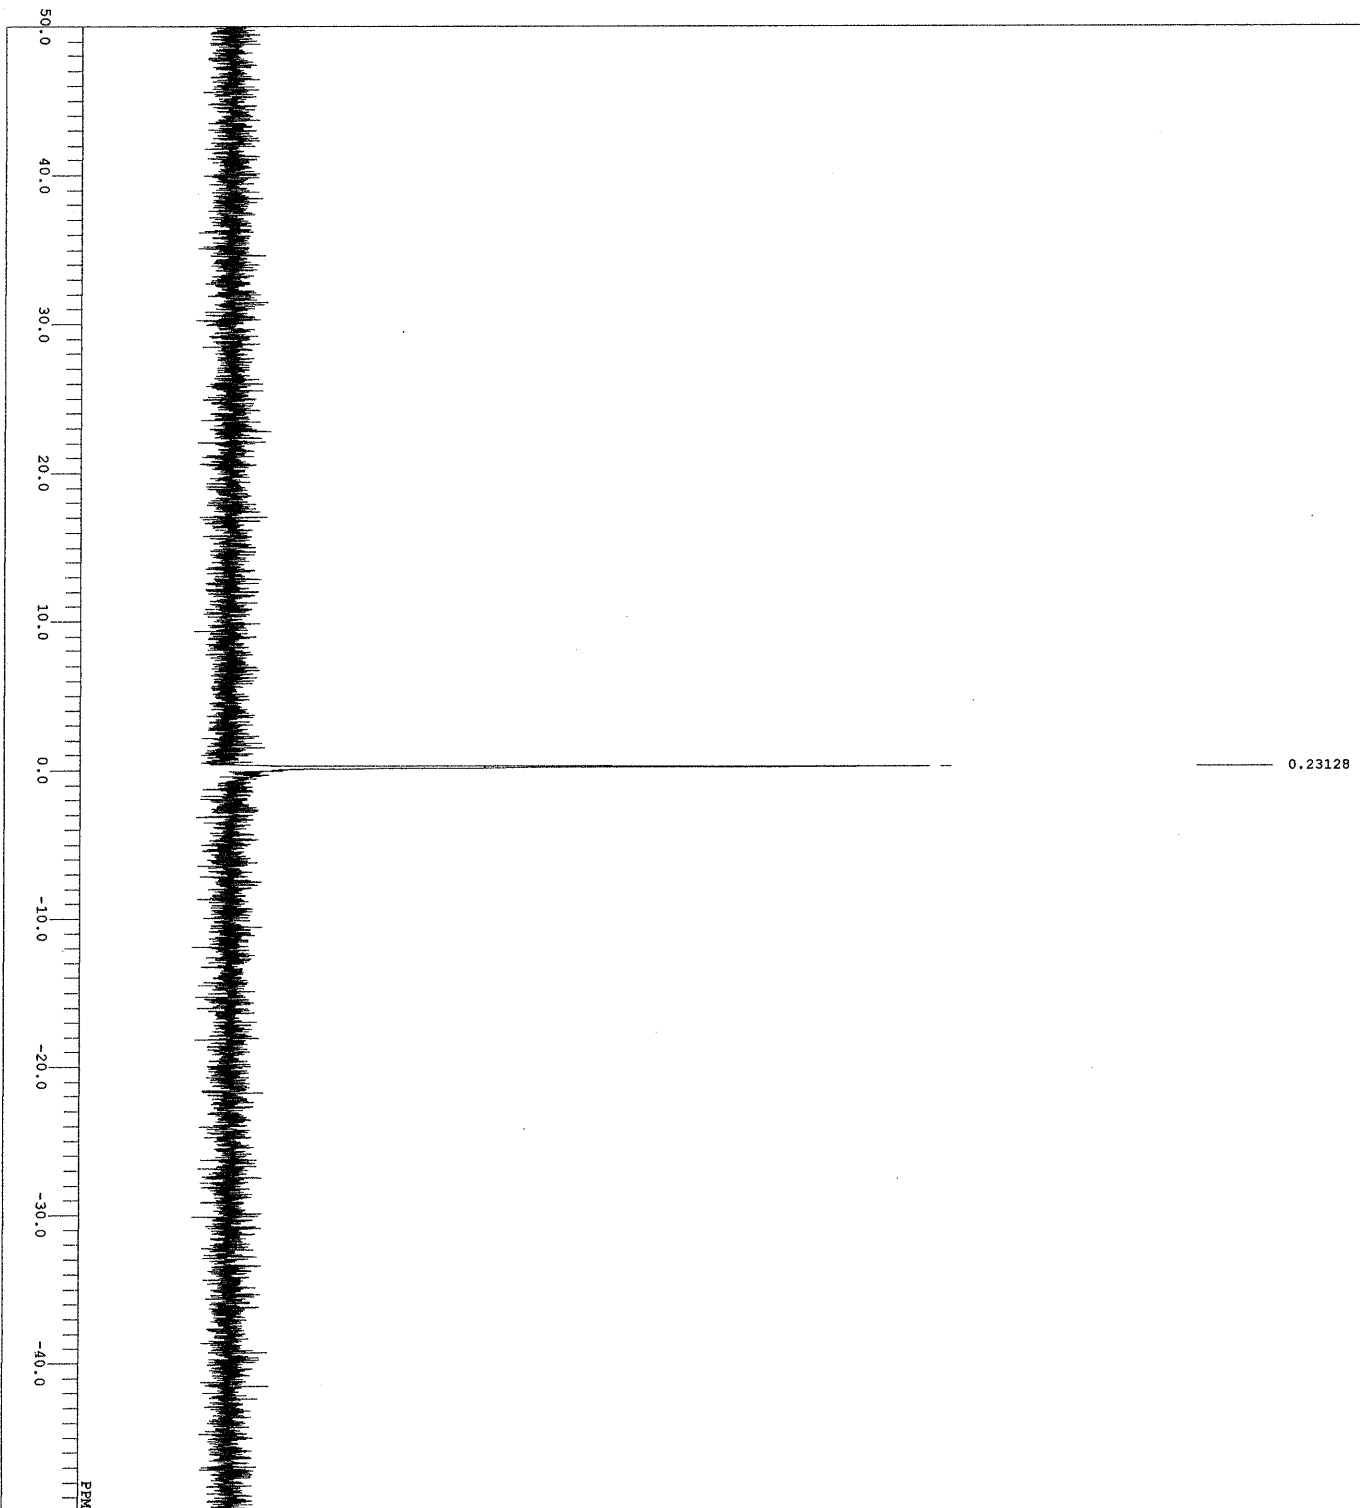

DF1LE 18kd\_3-phenyl-1-propanol-tm\_P-1-1.als  
 COMNT 07-03-2019 04:58:29  
 DATIM 07-03-2019 04:58:29  
 ORNTC 31P  
 EXMOD carbon\_1sp  
 OBSER 156.59 MHz  
 OBSER 7.98 KHZ  
 OBSER 9.23 Hz  
 POINT 26214  
 FREQOU 64102.56 Hz  
 SCANS 9  
 ACQTM 0.4089 sec  
 PD 2.0000 sec  
 PWT 4.80 usec  
 IRNTC 1H  
 CTEMP 20.0 C  
 CD3OD  
 SIVMT 0.00 PPM  
 EXREF 0.12 Hz  
 BF 56  
 RGAIN

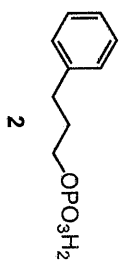

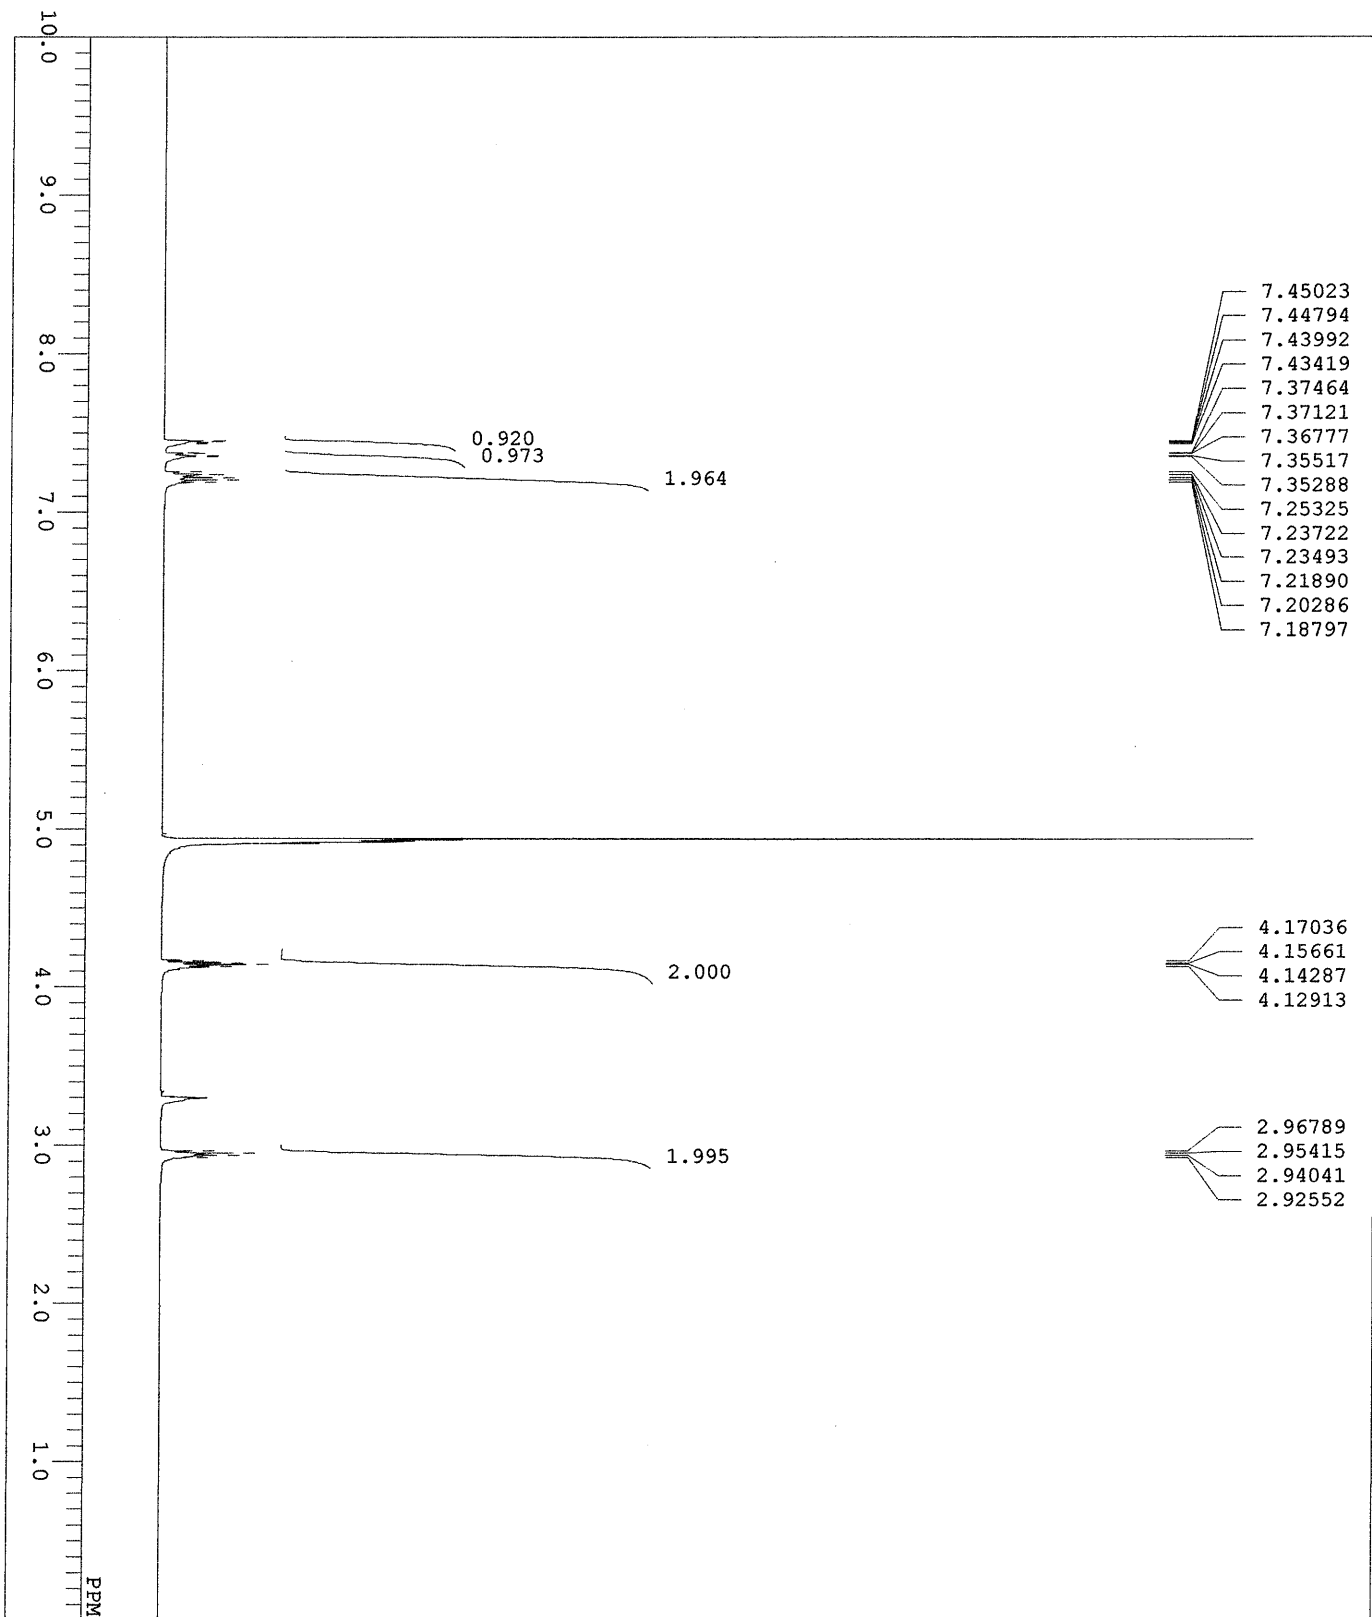

DFILE 18k33076HPLC3-1-1.als  
 COMNT 2018-09-01 03:07:51  
 DATIM 1H  
 OBNUC 1H  
 EXMOD proton.jxp  
 OBFRO 500.16 MHz  
 OBSET 2.41 KHz  
 OBFIN 6.01 Hz  
 POINT 13107  
 FREQU 7507.51 Hz  
 SCANS 8  
 ACQTM 1.7459 sec  
 PD 5.0000 sec  
 PW1 5.55 usec  
 IRNUC 1H  
 CTEMP 21.4 C  
 SLVNT CD3OD  
 EXREF 3.30 ppm  
 BF 0.12 Hz  
 RGAIN 30

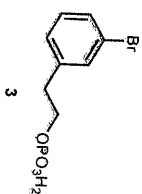

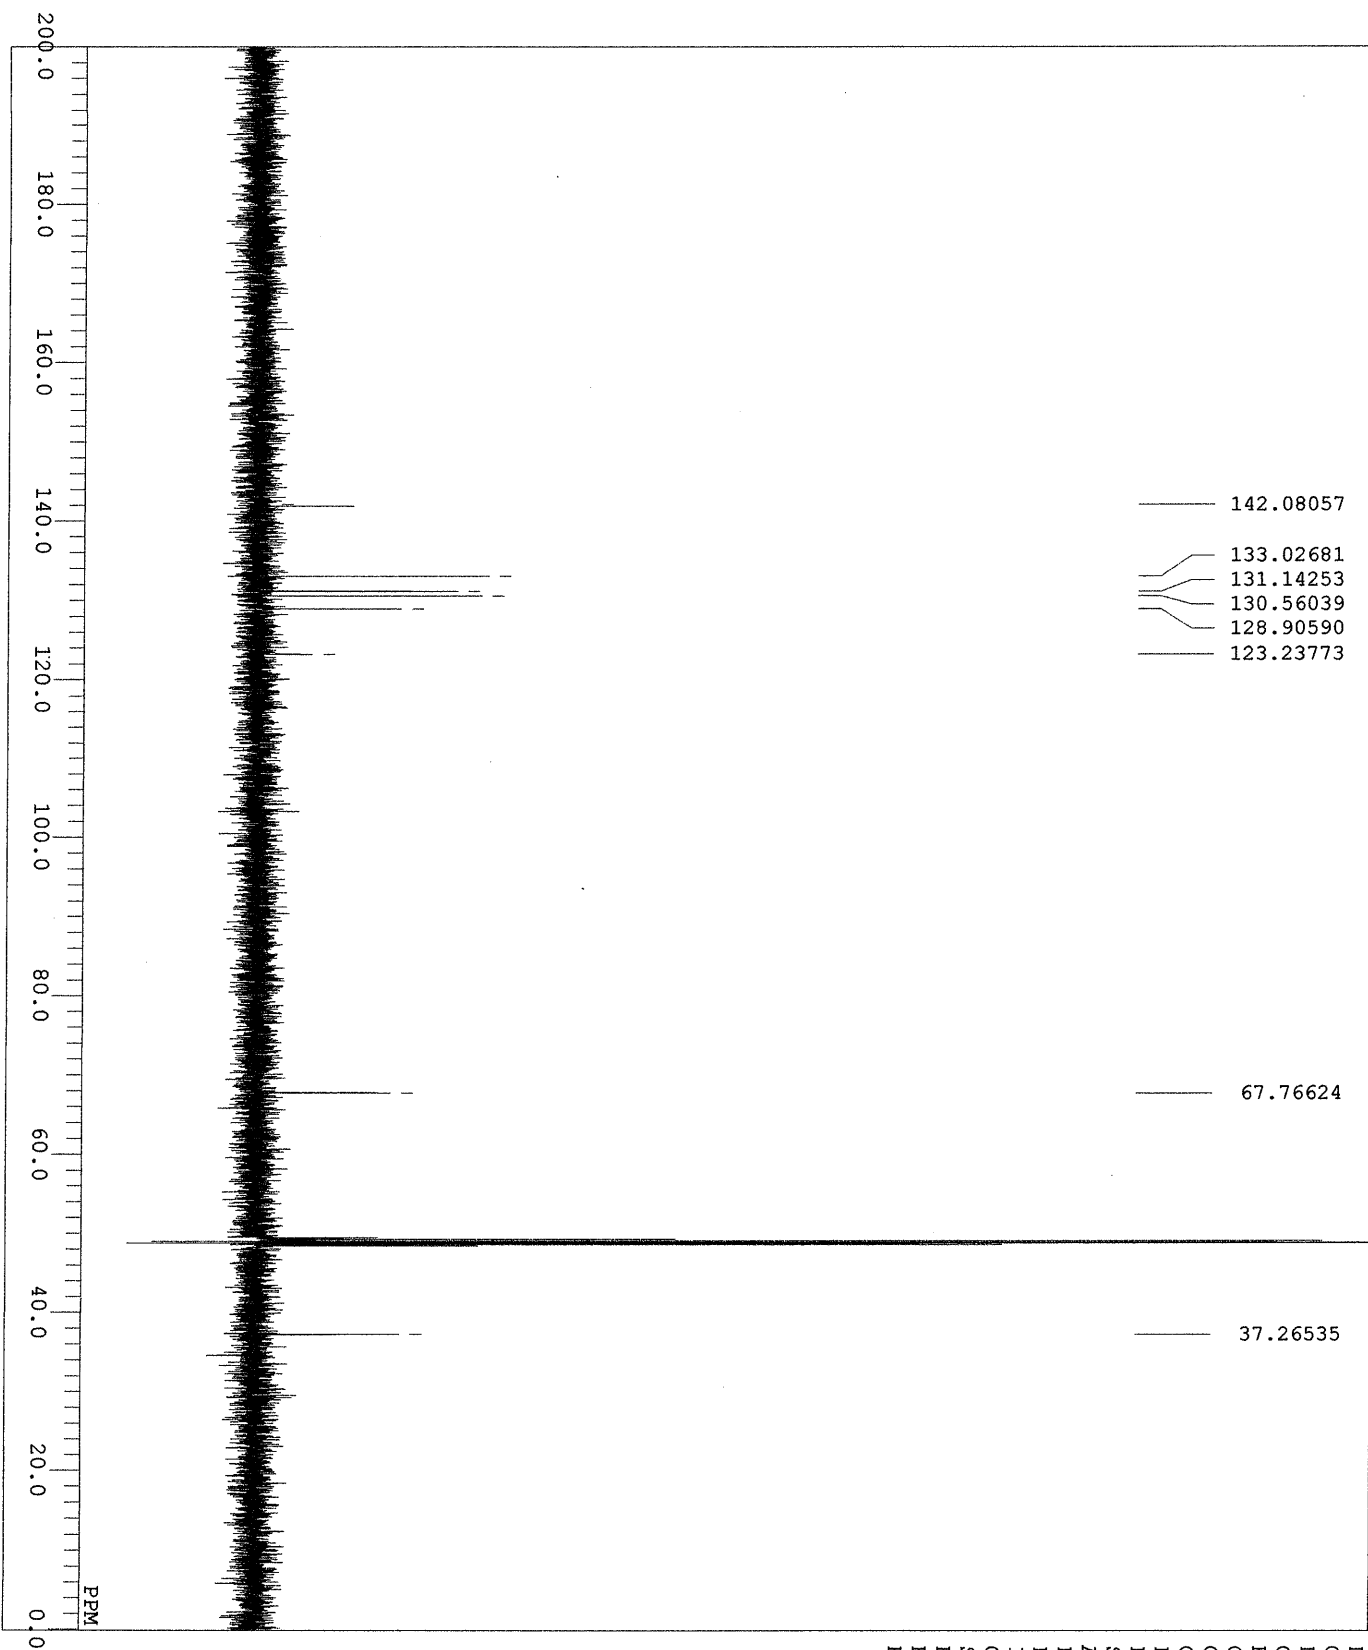

```

DFILE 18kd3076HPLC3_carbon-1-1.als
COMMENT
DATIM 2018-09-01 04:03:41
OBNUC 13C
EXMOD carbon.jxp
OBFRQ 125.77 MHz
OBSET 1.58 KHz
OBFIN 5.95 Hz
POINT 26214
FREOU 50505.05 Hz
SCANS 135
ACQTM 0.5190 sec
PD 2.0000 sec
PW1 3.40 usec
IRNUC 1H
CTEMP 21.9 c
SLVNT CD3OD
EXREF 49.00 ppm
BF 0.12 Hz
RGAIN 60
    
```

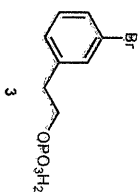

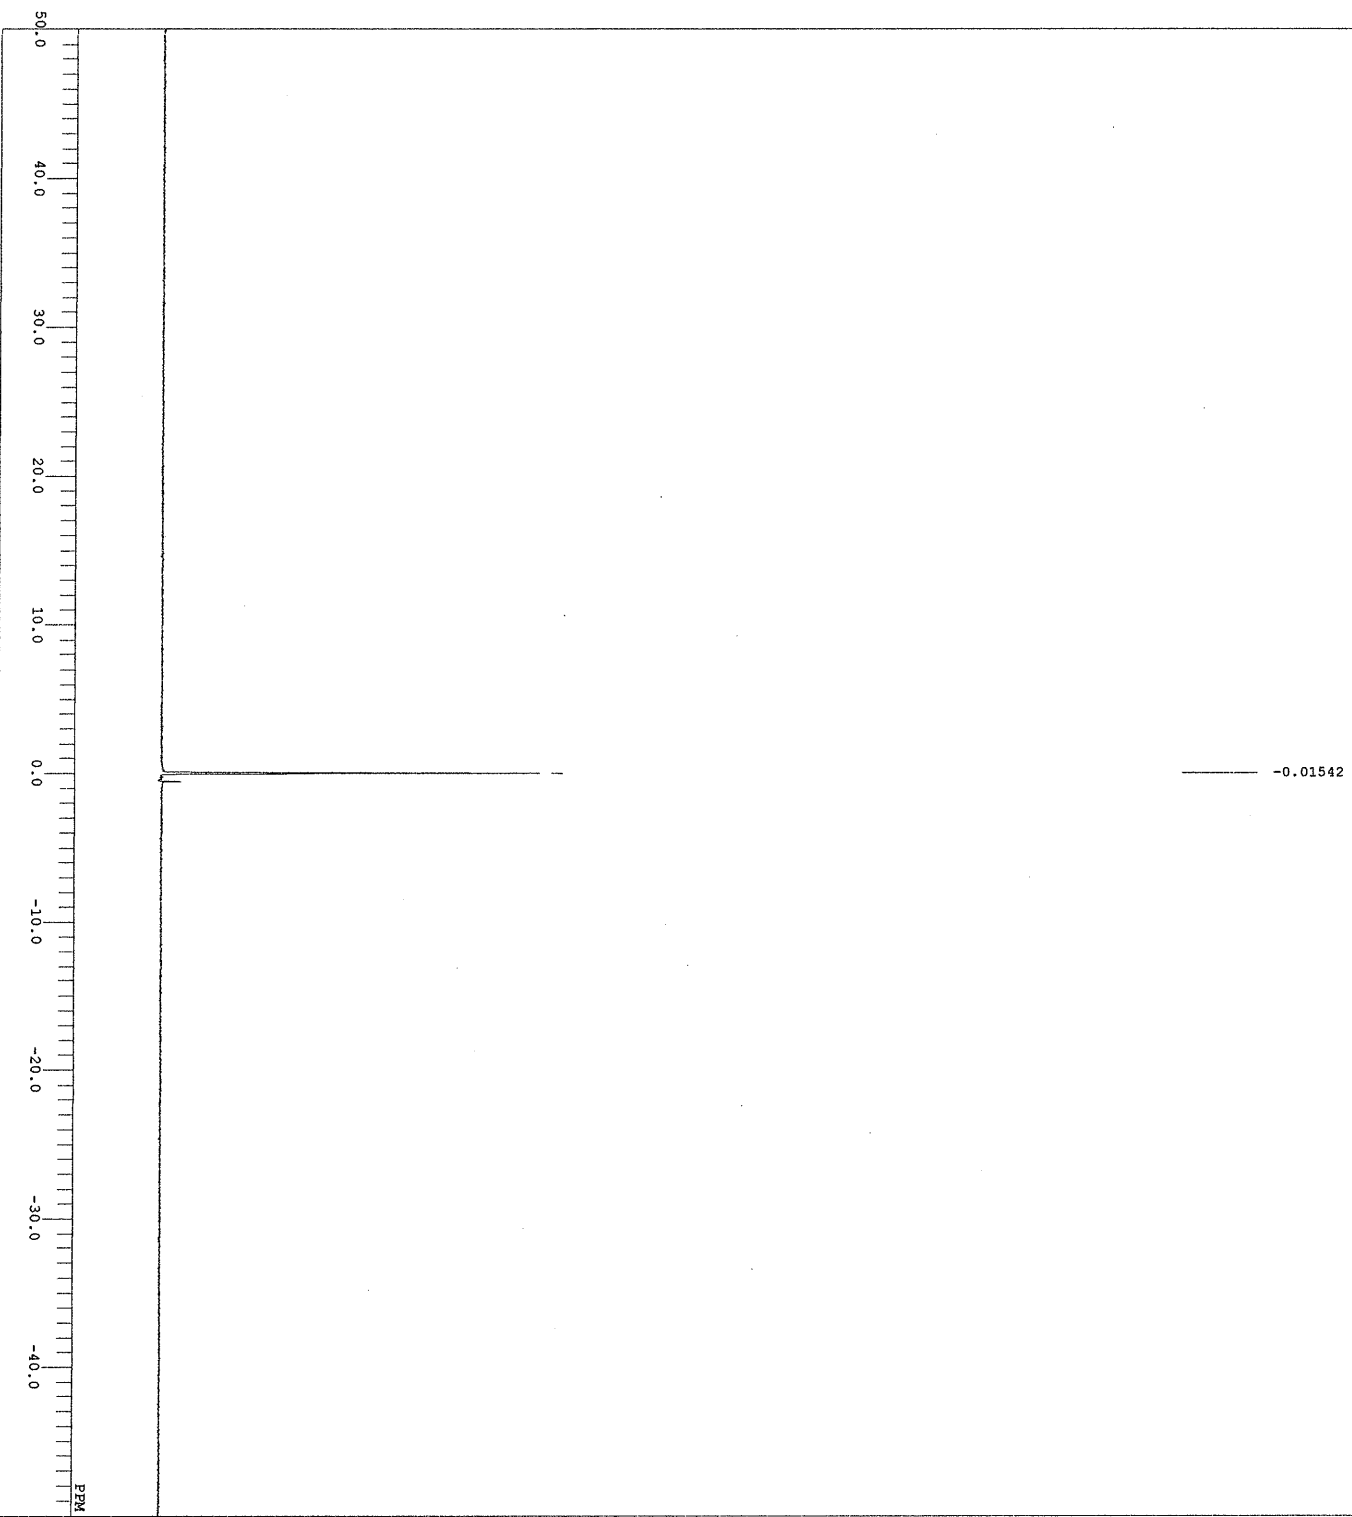

```

DFILE 18K3076HPI3_P-1-1.als
COMMENT
DATE_ 01-09-2018 04:50:03
INSTRUM 31P
EXMOD carbon-13p
ORPRO 158.59 MHz
ORSET 7.99 KHz
PULPROG zgpg30
PROBHD 5 mm QNP 1H/13
PULPROG 2
RGND 64102.36 Hz
SCANS 319
SOLVENT CD3OD
AQ 0.4089 sec
RG 2.0000 sec
PD 4.80 usec
PC 1H
IRNUC 1H
TEMP 20.6 c
SOLVENT CD3OD
EXREF 0.00 PPM
BF 0.12 Hz
RGAIN 56
    
```

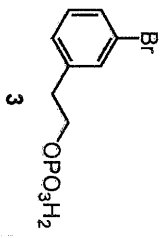

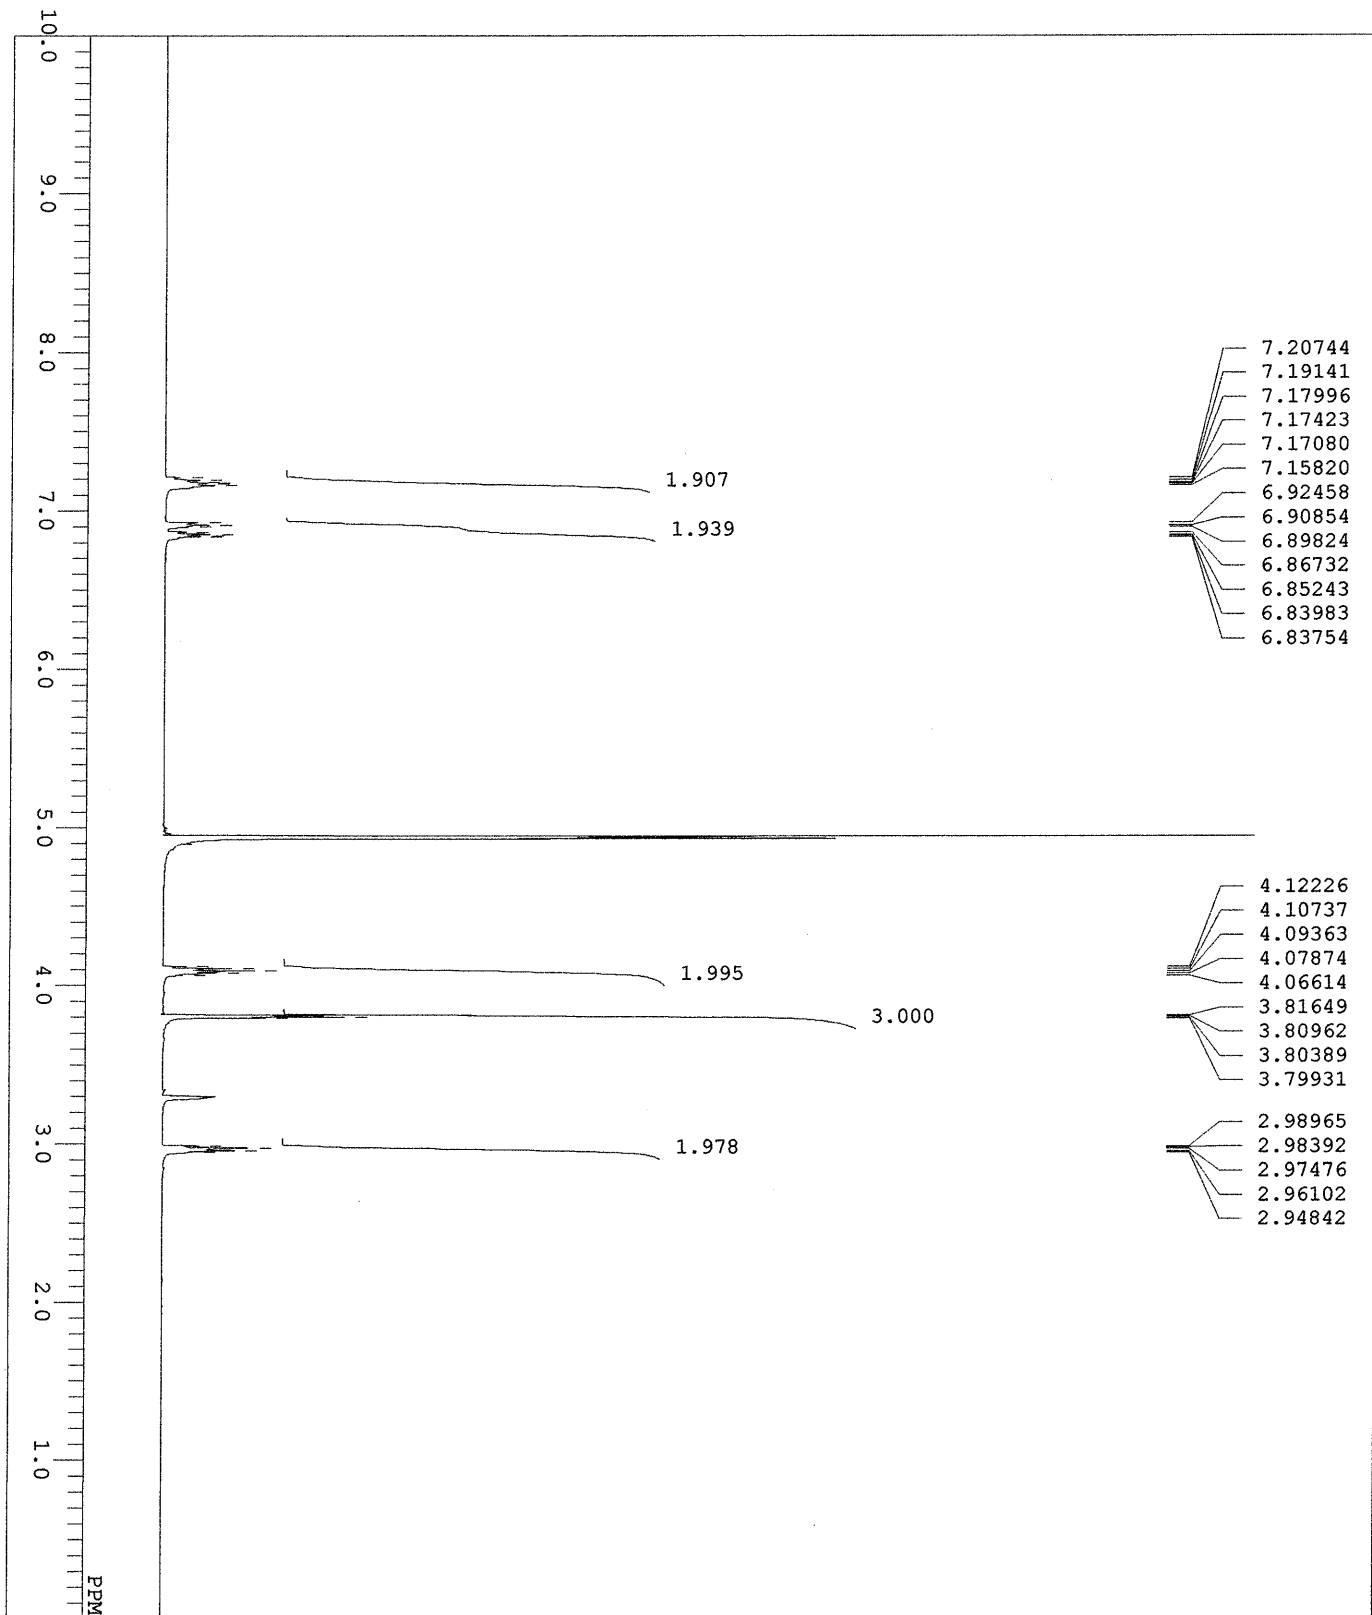

DFILE 18k43077HPLC3-1-1.als  
 COMMENT  
 DATIM 2018-09-01 03:10:45  
 OBNUC 1H  
 EXMOD proton.jxp  
 OBFRO 500.16 MHz  
 OBSET 2.41 KHz  
 OBFIN 6.01 Hz  
 POINT 13107  
 FREQ 7507.51 Hz  
 SCANS 8  
 ACQTM 1.7459 sec  
 PD 5.0000 sec  
 PW1 5.55 usec  
 IRNUC 1H  
 CTEMP 21.4 C  
 SLVNT CD3OD  
 EXREF 3.30 ppm  
 BF 0.12 Hz  
 RGAIN 30

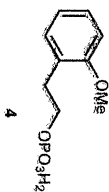

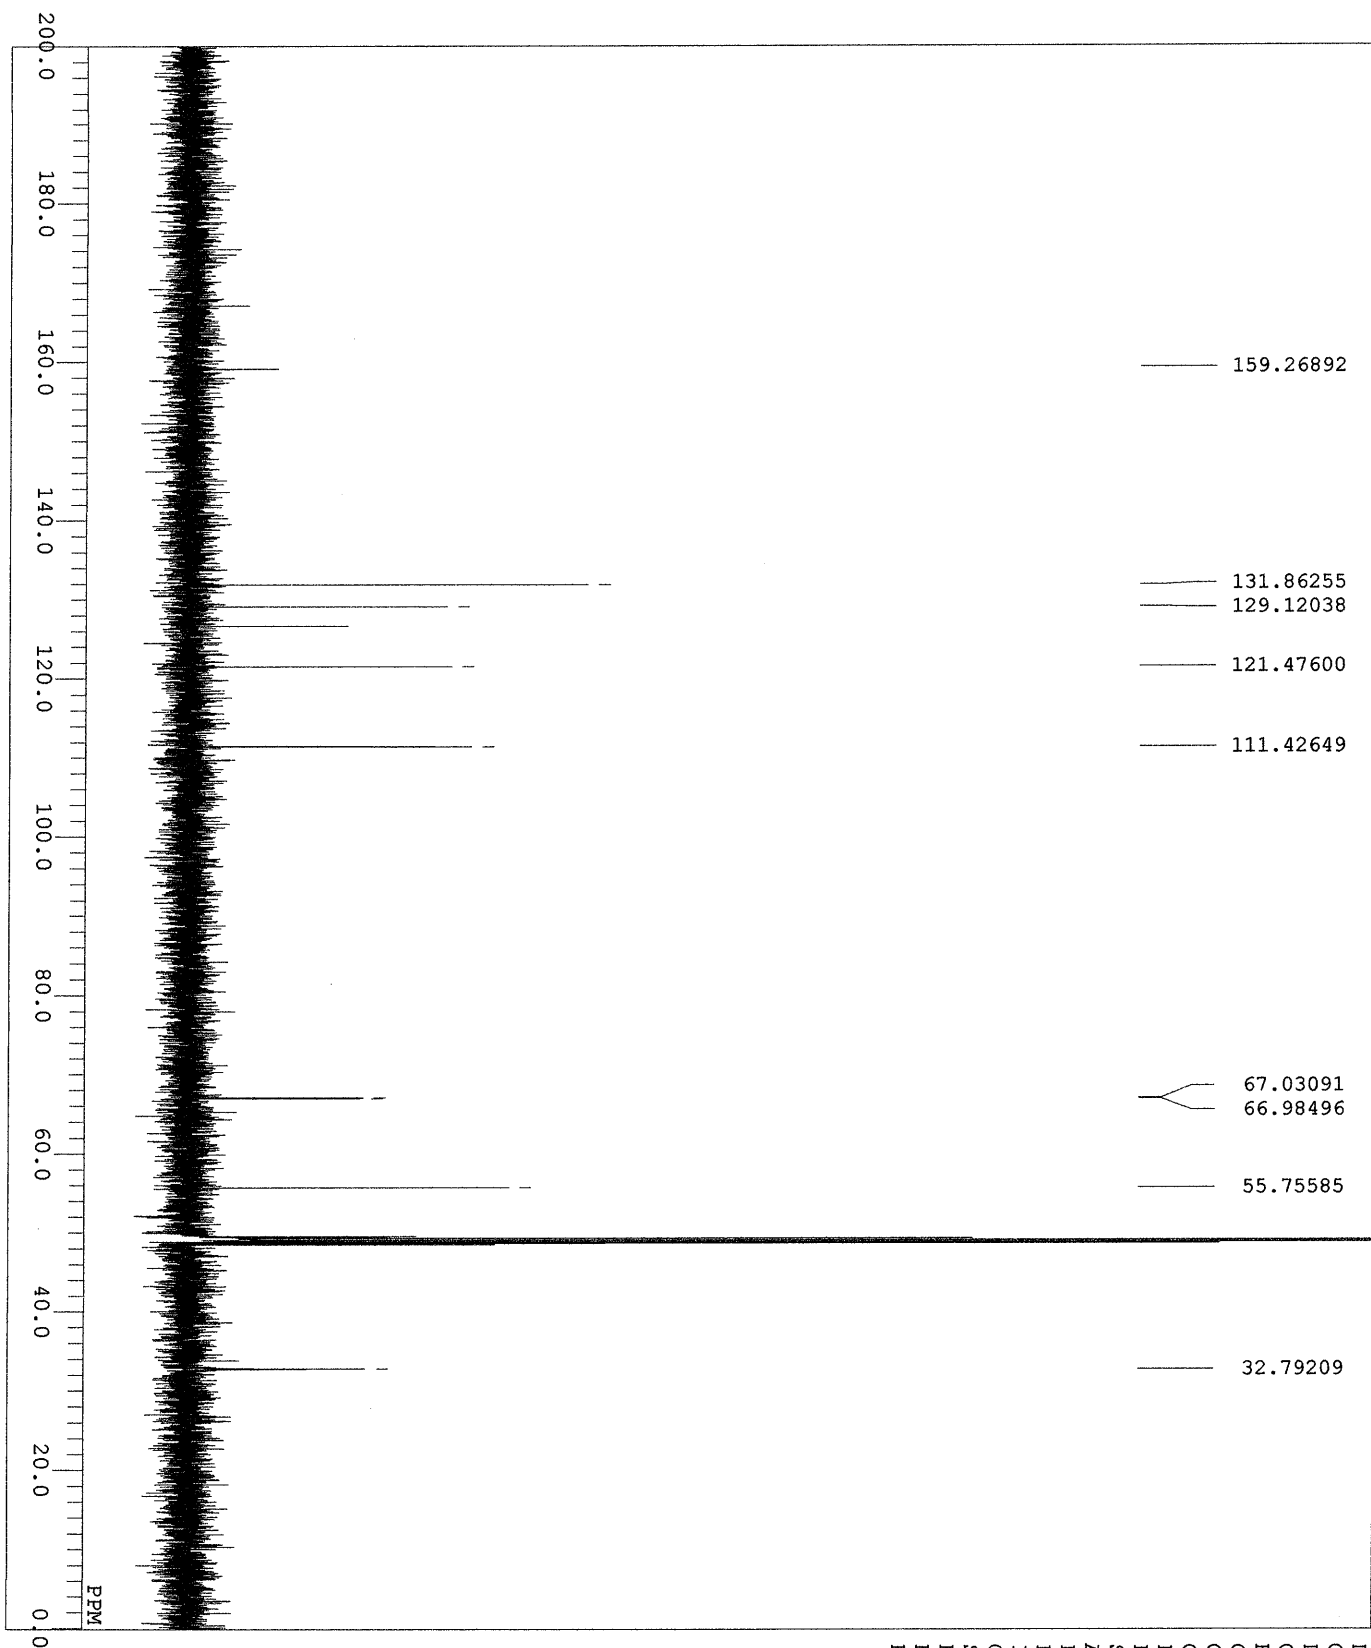

DFILE 18k43077HPLC3\_carbon-1-1.als  
 COMMENT 2018-09-01 03:56:52  
 DATIM 2018-09-01 03:56:52  
 OBNUC 13C  
 EXMOD carbon.fxp  
 OBFRO 125.77 MHz  
 OBSEF 1.58 KHz  
 OBFIN 5.95 Hz  
 POINT 26214  
 FREQU 50505.05 Hz  
 SCANS 120  
 ACQIM 0.5190 sec  
 PD 2.0000 sec  
 PM1 3.40 usec  
 IRNUC 1H  
 CTEMP 21.8 C  
 SLVNT CD3OD  
 EXREF 49.00 ppm  
 BF 0.12 Hz  
 RGAIN 60

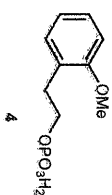

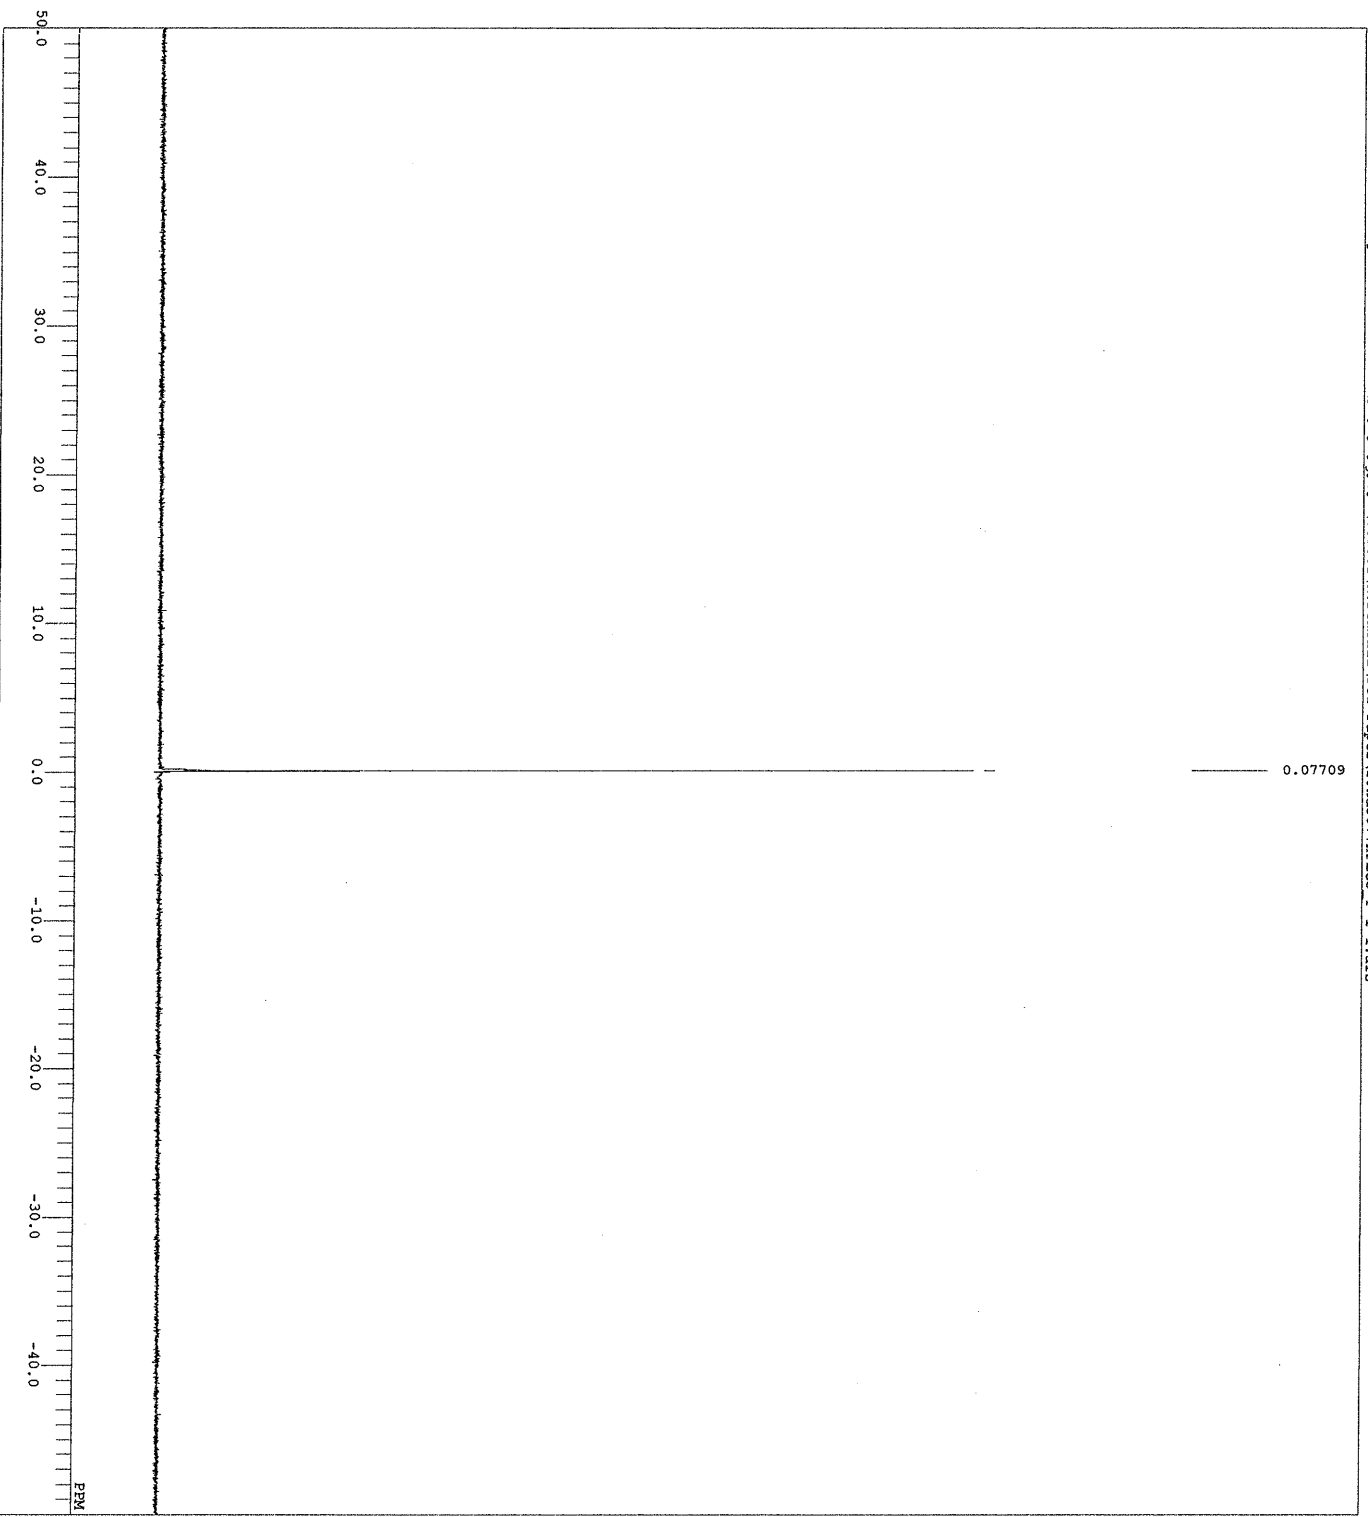

FILE 18k307HPIC3\_P-1-1.als  
 COMMENT  
 DATE 01-09-2018 05:44:45  
 ORNTIC 31P  
 EXMOD carbon, 13P  
 OBSRC 158.59 MHz  
 OBSRT 7.98 KHZ  
 OBSFN 9.229 Hz  
 POINT 28214  
 FRSOU 64102.56 Hz  
 SCANS 41  
 ACQTM 0.4089 sec  
 PD 2.0000 sec  
 PW1 4.80 usec  
 IRNTIC 1H  
 CTEMP 20.6 C  
 SLVMT CD3OD  
 EXREF 0.00 ppm  
 BF 0.12 Hz  
 RGAIN 56

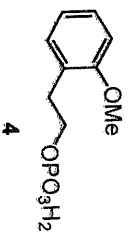



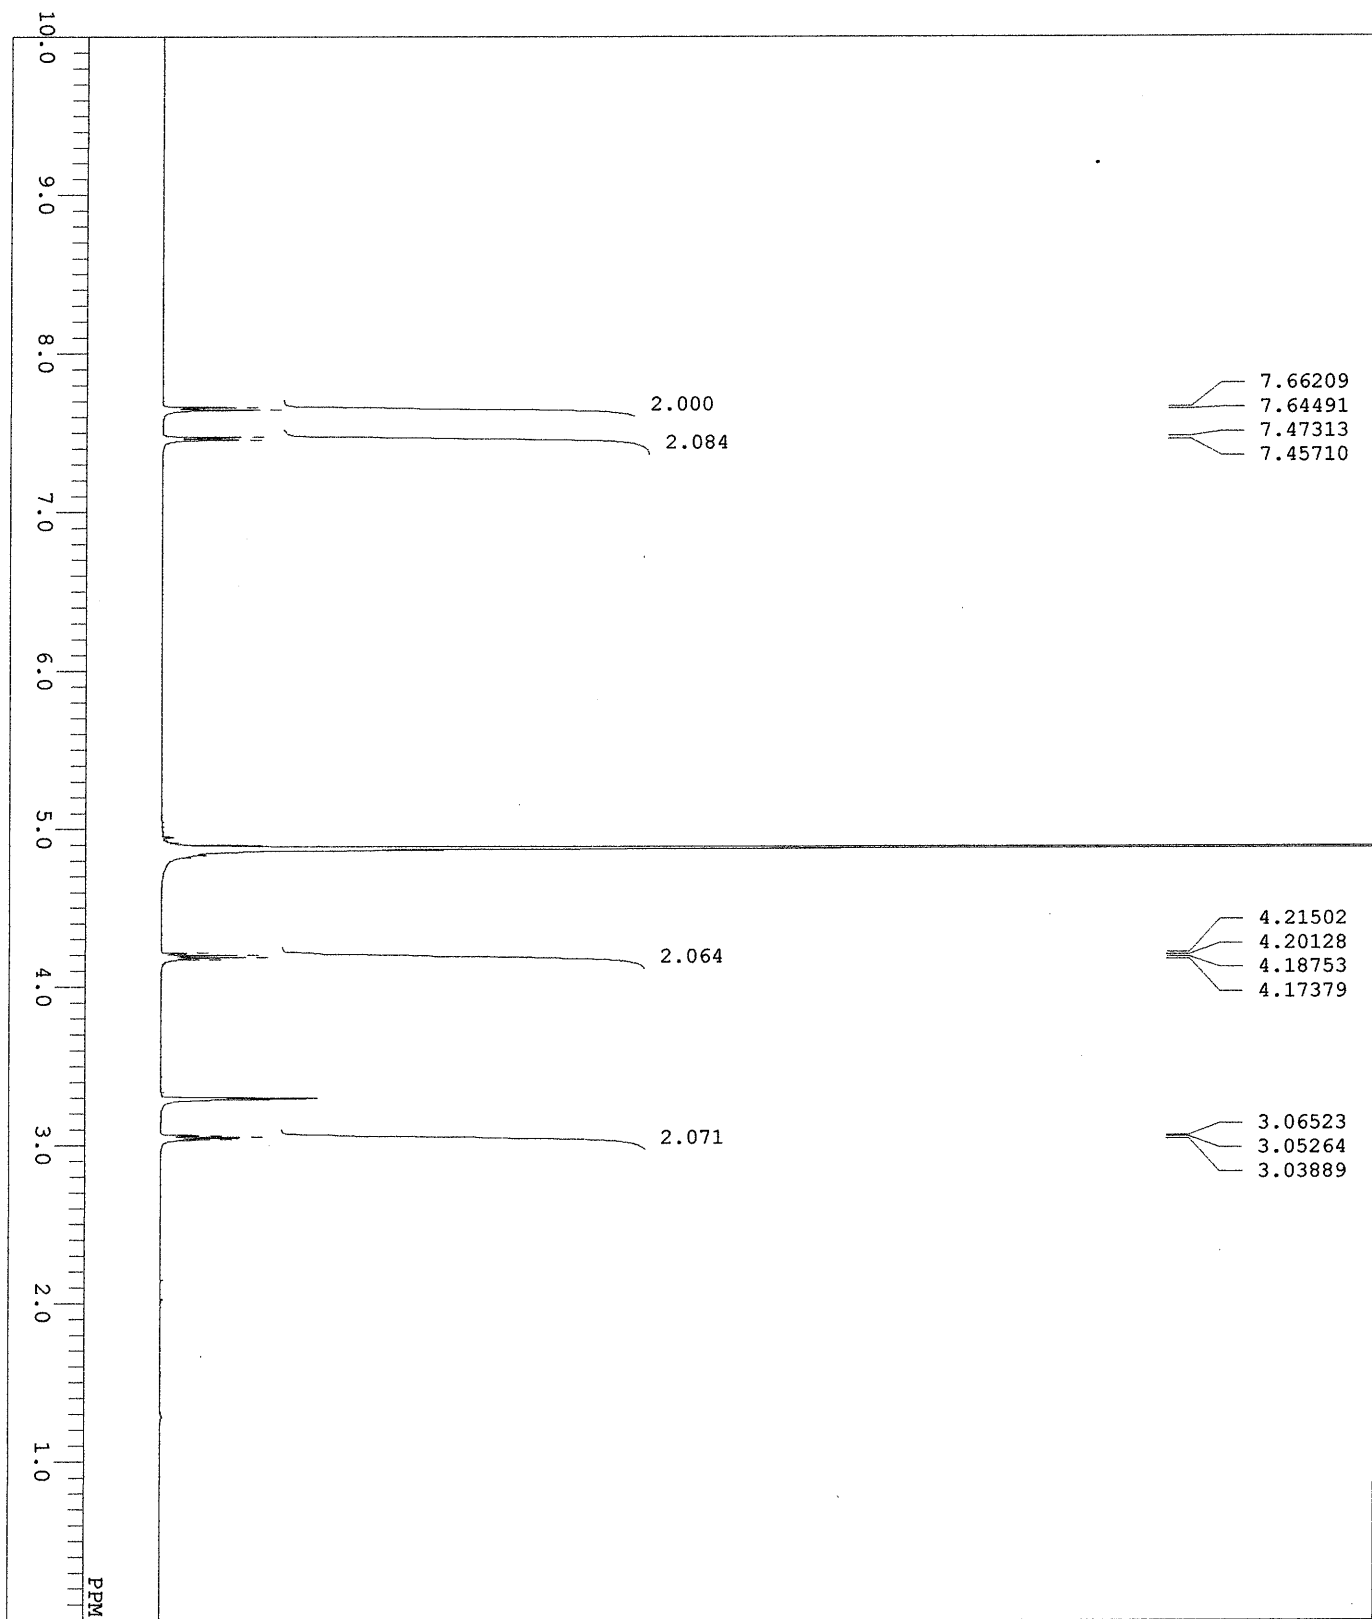

DFILE 18k3122HPIG2-1-1.als  
 COMMENT  
 DATIM 2018-09-20 07:43:10  
 OBNUC 1H  
 EXMOD proton.jxp  
 OBFRO 500.16 MHz  
 OBSET 2.41 KHz  
 OBFIN 6.01 Hz  
 POINT 13107  
 FREQU 7507.51 Hz  
 SCANS 6  
 ACQTM 1.7459 sec  
 PD 5.0000 sec  
 PW1 5.55 usec  
 IRNUC 1H  
 CTEMP 22.0 c  
 SLYNT CD3OD  
 EXREF 3.30 ppm  
 BF 0.12 Hz  
 RGAIN 30

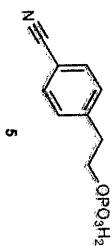

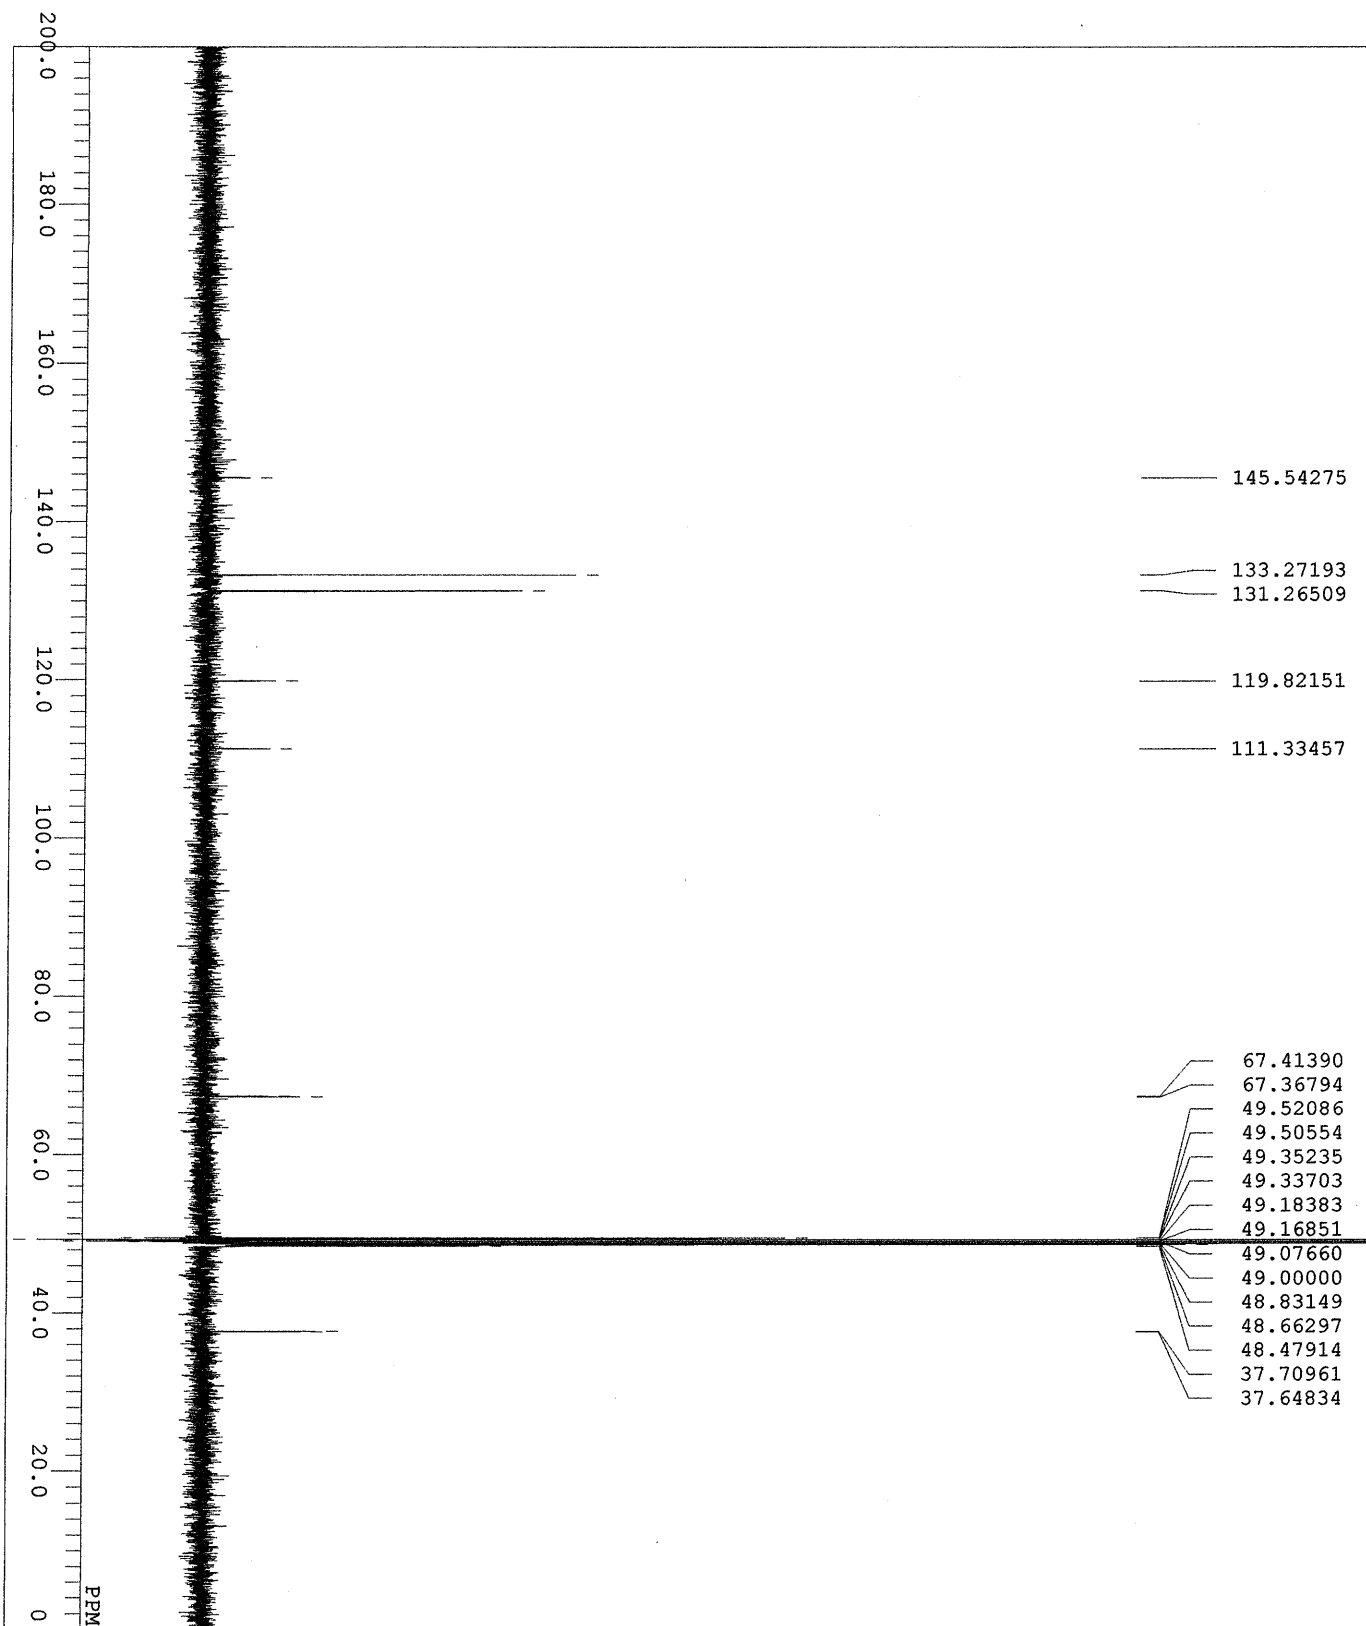

```

DEFILE 18kd3122HPLC2_carbon-1-1.als
COMNT 2018-09-20 07:44:28
DATIM 13C
OBNUC carbon-1-1
EXMOD carbon-1-1
OBFRO 125.77 MHz
OBSET 1.58 KHz
OBFIN 5.95 Hz
POINT 26214
FREOU 50505.05 Hz
SCANS 1149
ACQTM 0.5190 sec
PD 2.0000 sec
PW1 3.40 usec
IRNUC 1H
CTEMP 22.2 c
SLVNT CD3OD
EXREF 49.00 ppm
BF 0.12 Hz
RGAIN 60
    
```

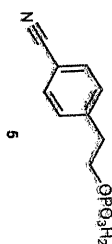

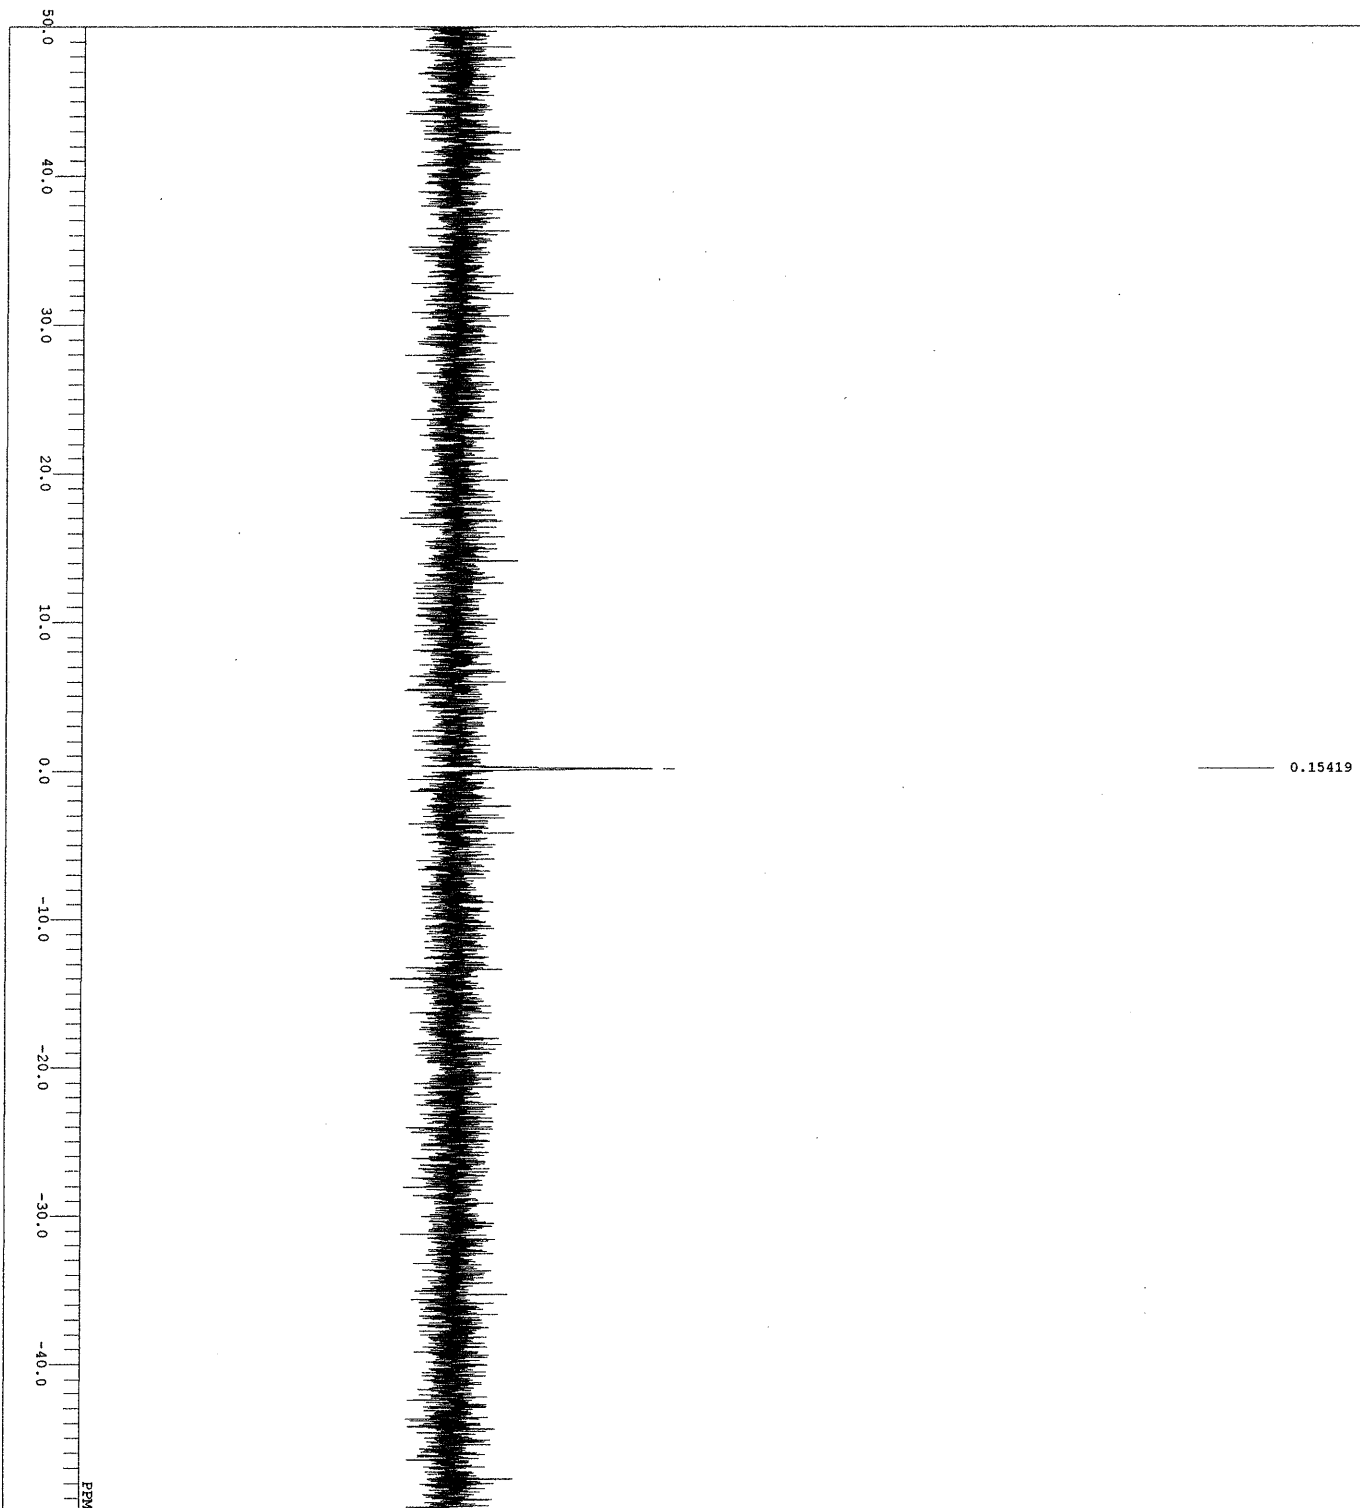

FILE 18kd3122tm\_P-1-1.als  
 COMPT 07-03-2019 05:13:36  
 DATIN 31P  
 OBNTC 31P  
 EXMOD carbon-13p  
 OBPRG 15g 59 MHz  
 OBSFT 7.99 KHZ  
 OBFTN 9.23 Hz  
 FOINT 28214  
 FREQD 64102.56 Hz  
 SCANS 16  
 ACQTM 0.4089 sec  
 PD 2.0000 sec  
 PWT 4.80 usec  
 IRMTC 1H  
 CTEMP 20.1 c  
 SIVMT CD3OD  
 EXREF 0.00 ppm  
 BF 0.12 Hz  
 RGAIN 56

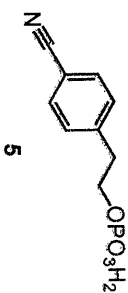

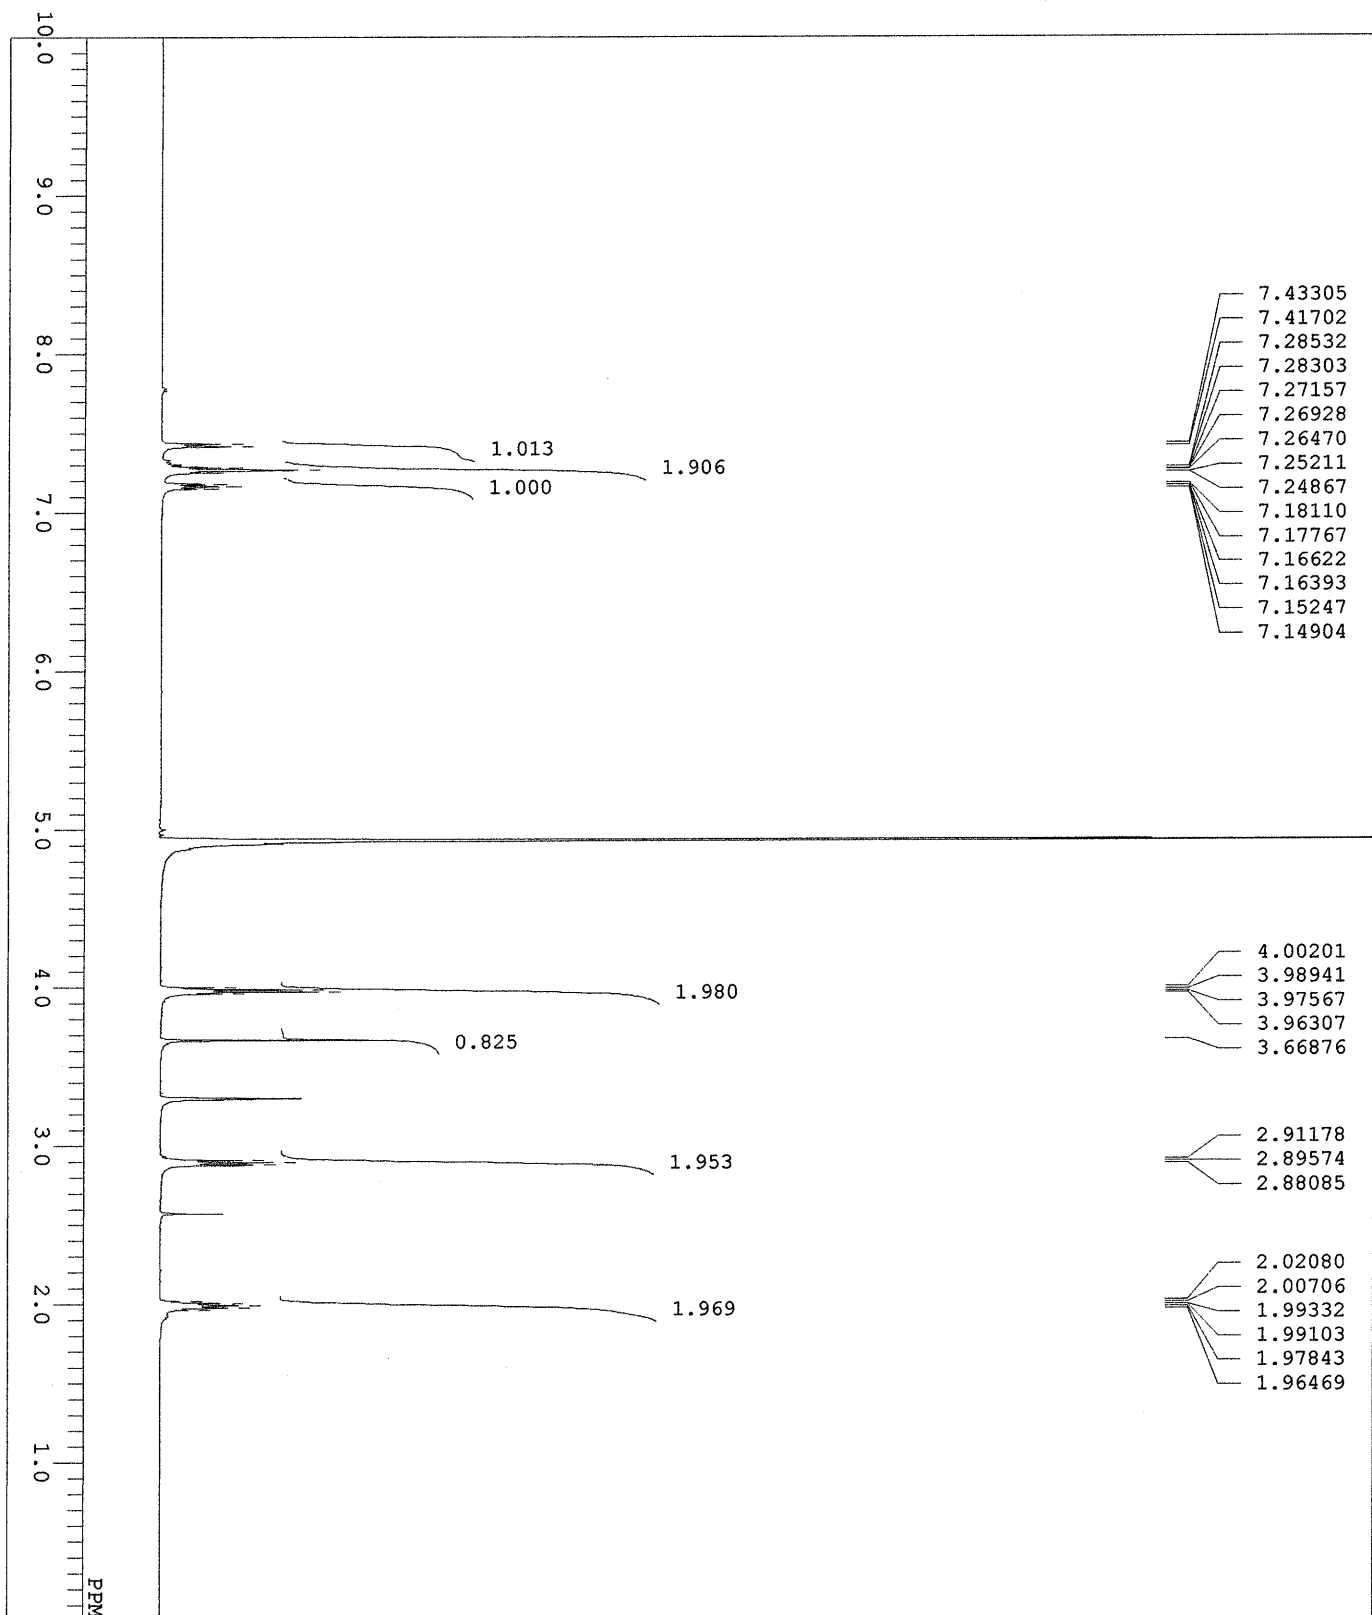

DFILE 18k3087HPLC3-1-1.als  
 COMMENT  
 DATIM 2018-09-01 04:56:42  
 OBNUC 1H  
 EXMOD proton.jxp  
 OBFRO 500.16 MHz  
 OBSET 2.41 KHz  
 OBFIN 6.01 Hz  
 POINT 13107  
 PREOU 7507.51 Hz  
 SCANS 8  
 ACQTM 1.7459 sec  
 PD 5.0000 sec  
 PW1 5.55 usec  
 IRNUC 1H  
 CTEMP 21.5 C  
 SLVNT CD3OD  
 EXREF 3.30 ppm  
 BF 0.12 Hz  
 RGAIN 30

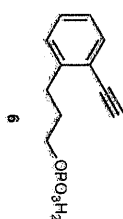

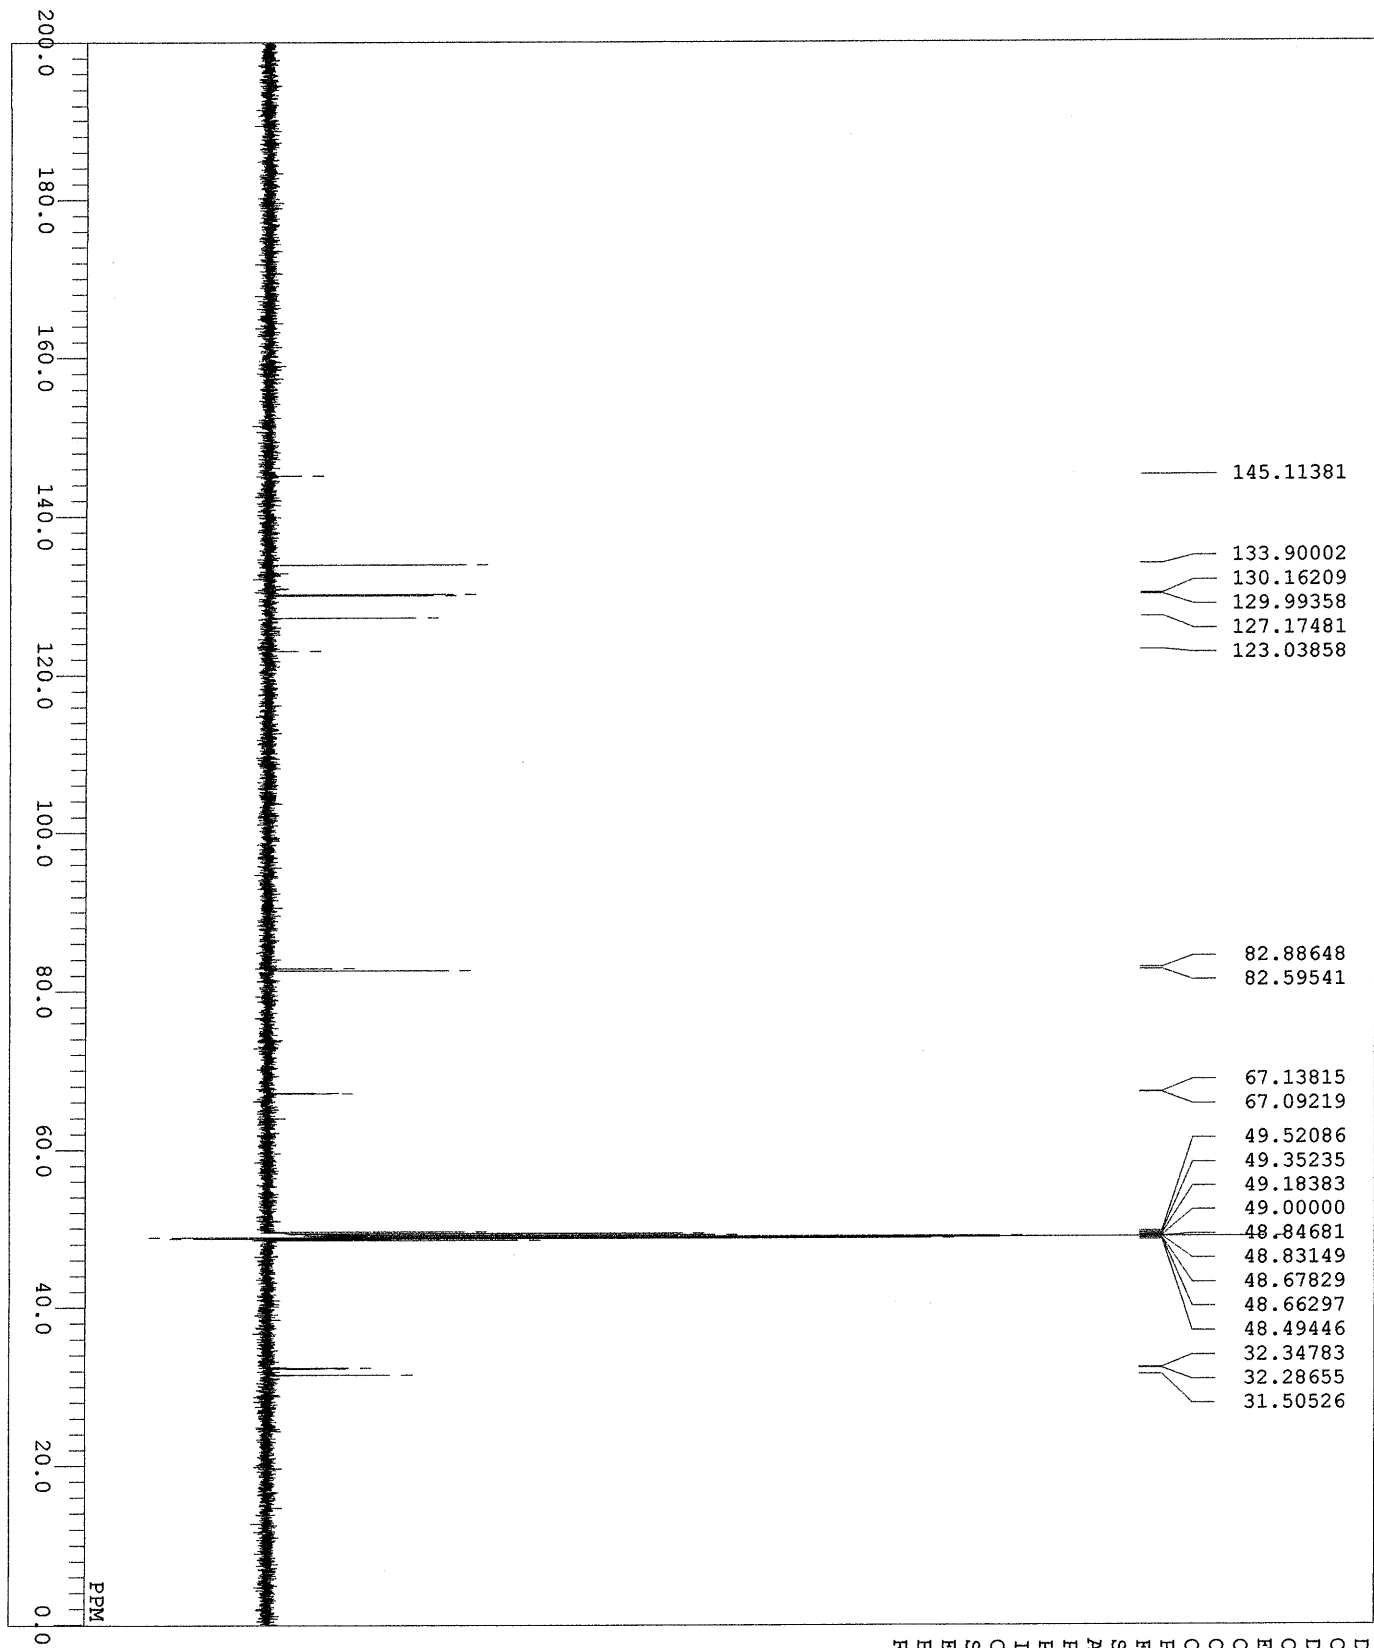

DFILE 18k43087HPI-C3\_carbon-1-1.als  
 COMMENT 2018-09-01 05:06:20  
 DATIM 13C  
 OBNUC carbon.jxp  
 EXMOD 125.77 MHz  
 OBFRO 1.58 KHz  
 OBSSET 5.95 Hz  
 OBFIN 26214  
 POINT 50505.05 Hz  
 FREQU 301  
 SCANS 0.5190 sec  
 ACQIM 2.0000 sec  
 PD 3.40 usec  
 PW1 1H  
 IRNUC 22.1 c  
 CTEMP CD3OD  
 SLVNT 49.00 ppm  
 EXREF BF 0.12 Hz  
 RGAIN 60

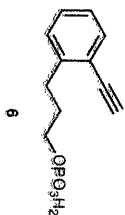

DELTA 18kd3087HPLC3\_P-1-1.als  
 COMMENT 01-09-2018 23:06:27  
 ORBIT 31P  
 EXMOD carbon-13p  
 OBSER2 156.58 MHz  
 OBSER1 7.99 KHz  
 OFFSET 9.23 Hz  
 POINT 26214  
 FREQD 64102.56 Hz  
 SCANS 29  
 ACQTM 0.4089 sec  
 PD 2.0000 sec  
 PULP 4.80 usec  
 INTC 1H  
 CTEMP 20.2 c  
 SLYMT CD30D  
 EXREF 0.00 ppm  
 BF 0.12 Hz  
 RGAIN 56

0.15419

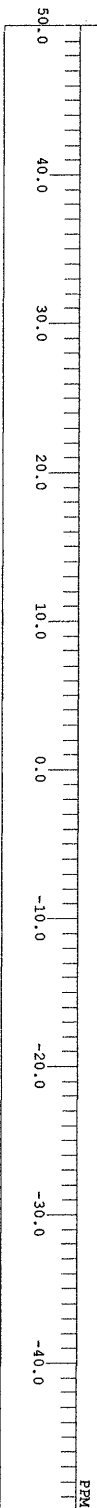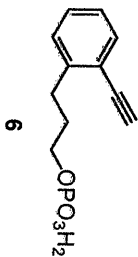

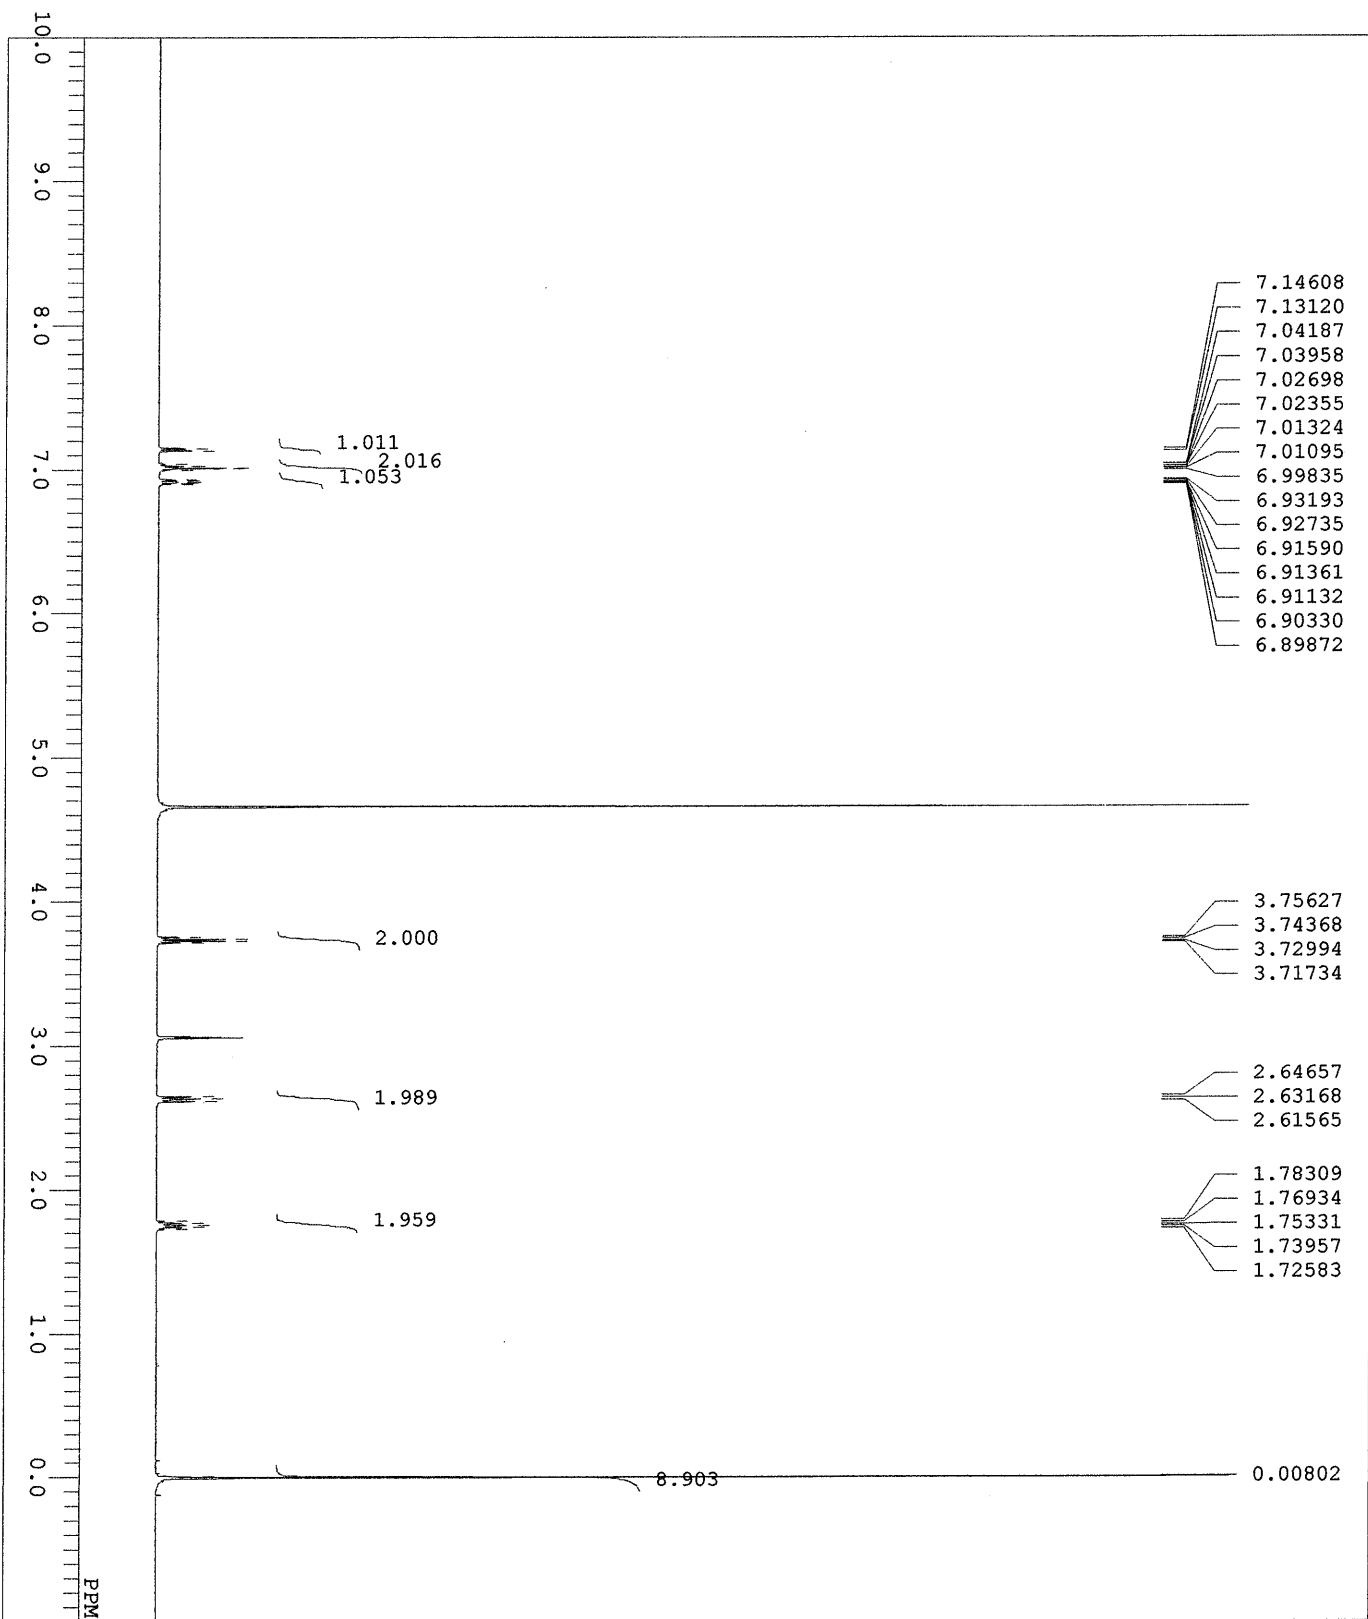

DFILE 18kd3180HPLC8-1-1.a1s  
 COMMENT  
 DATIM 2018-10-03 08:25:20  
 OBNUC 1H  
 EXMOD proton.jxp  
 OBFRO 500.16 MHz  
 OBSET 2.41 KHz  
 OBFIN 6.01 Hz  
 POINT 13107  
 FREQU 7507.51 Hz  
 SCANS 8  
 ACQTM 1.7459 sec  
 PD 8.0000 sec  
 PW1 5.55 usec  
 IRNUC 1H  
 CTEMP 21.8 c  
 SIVNT CD3OD  
 EXREF 0.00 ppm  
 BF 0.12 Hz  
 RGAIN 32

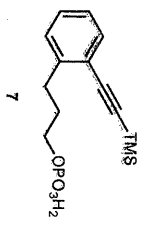

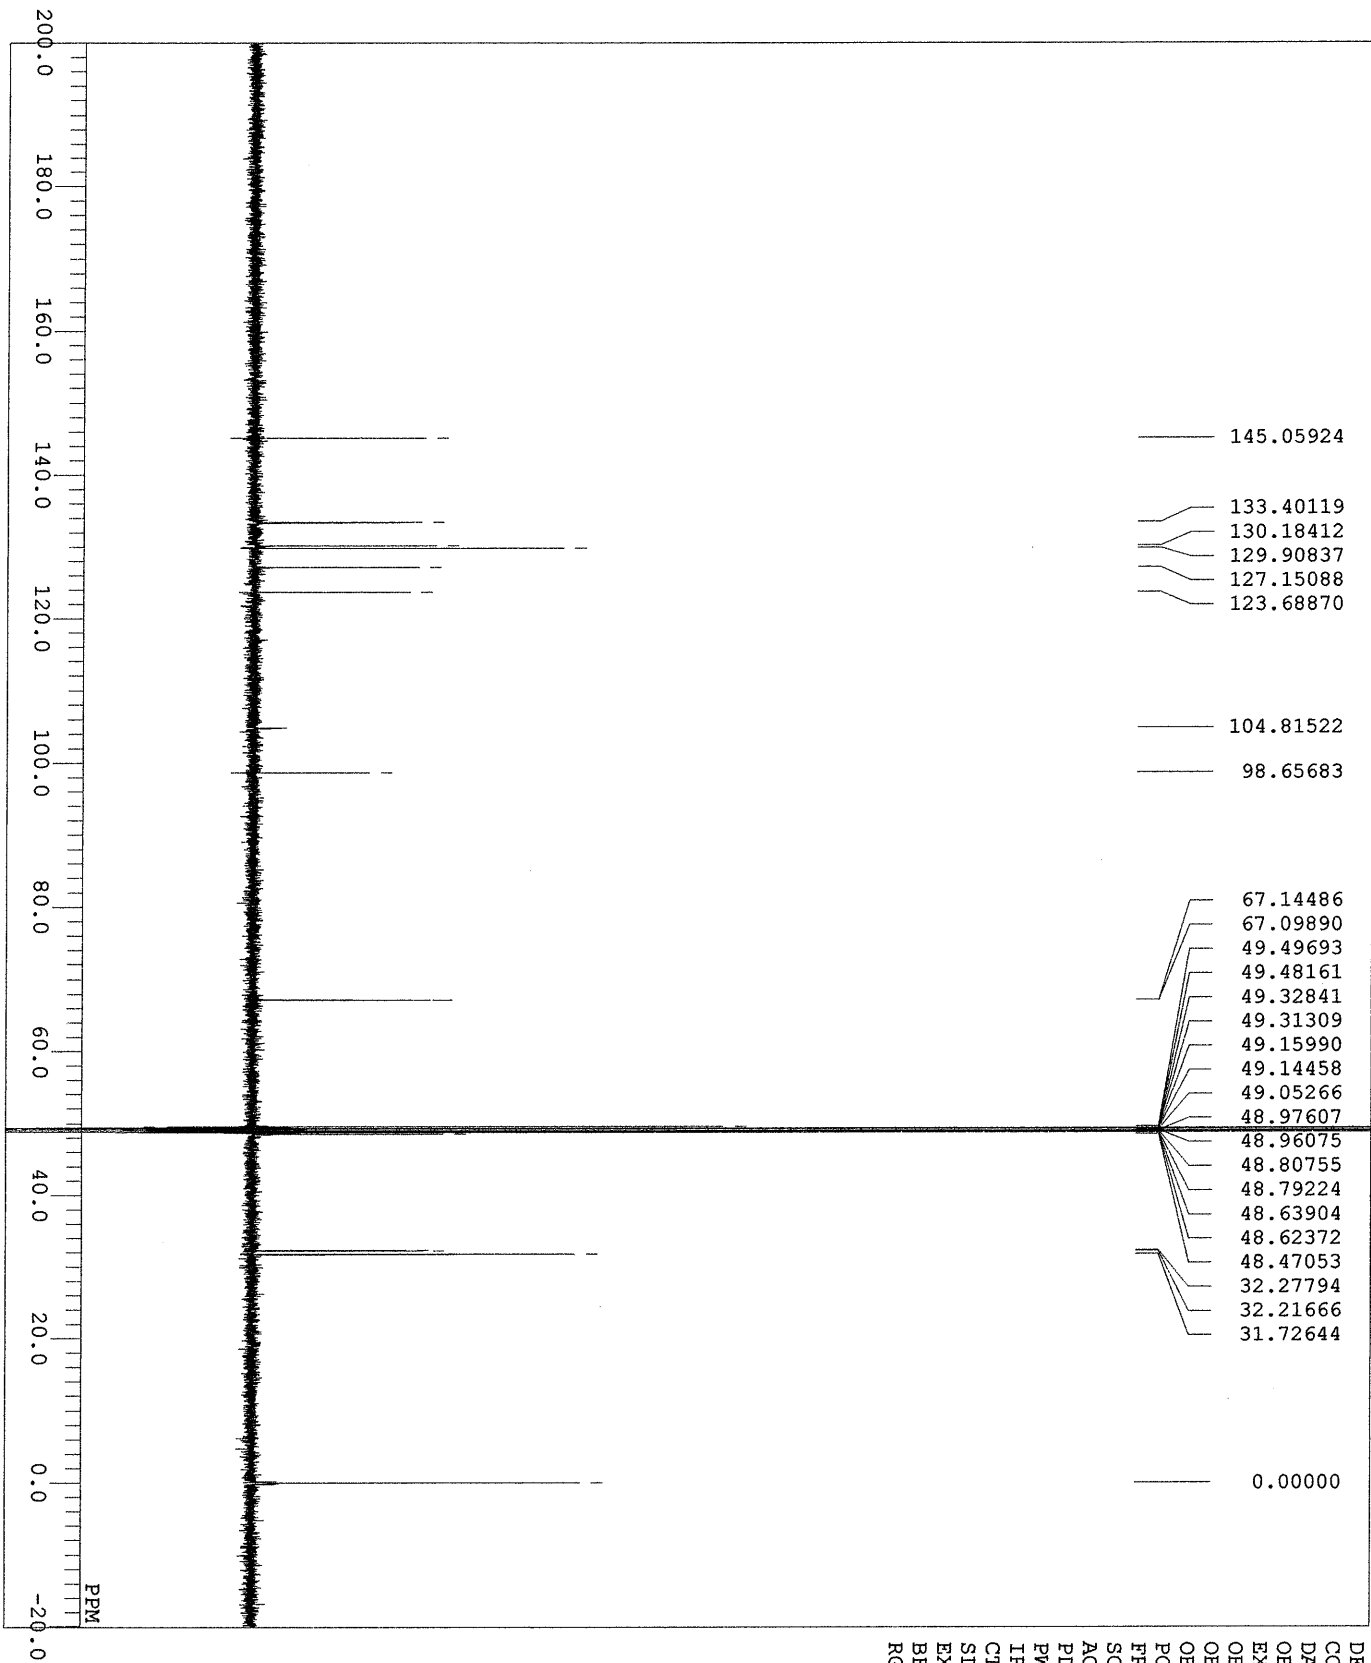

DFILE 18kd3180HPLC8\_carbon\_retry-1-1.  
 COMNT 2018-10-03 08:37:09  
 DATIM 13C  
 OBNUC carbon\_jxp  
 EXMOD 125.77 MHz  
 OBFRO 1.58 KHz  
 OBSET 5.95 Hz  
 OBFIN 26214  
 POINT 50505.05 Hz  
 FREOU 1637  
 SCANS 0.5190 sec  
 ACO TM 2.0000 sec  
 PD 3.40 usec  
 PW1  
 IRNUC 1H  
 CTEMP 22.2 c  
 SLVNT CD3OD  
 EXREF 0.00 ppm  
 BF 0.12 Hz  
 RGAIN 60

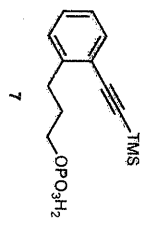





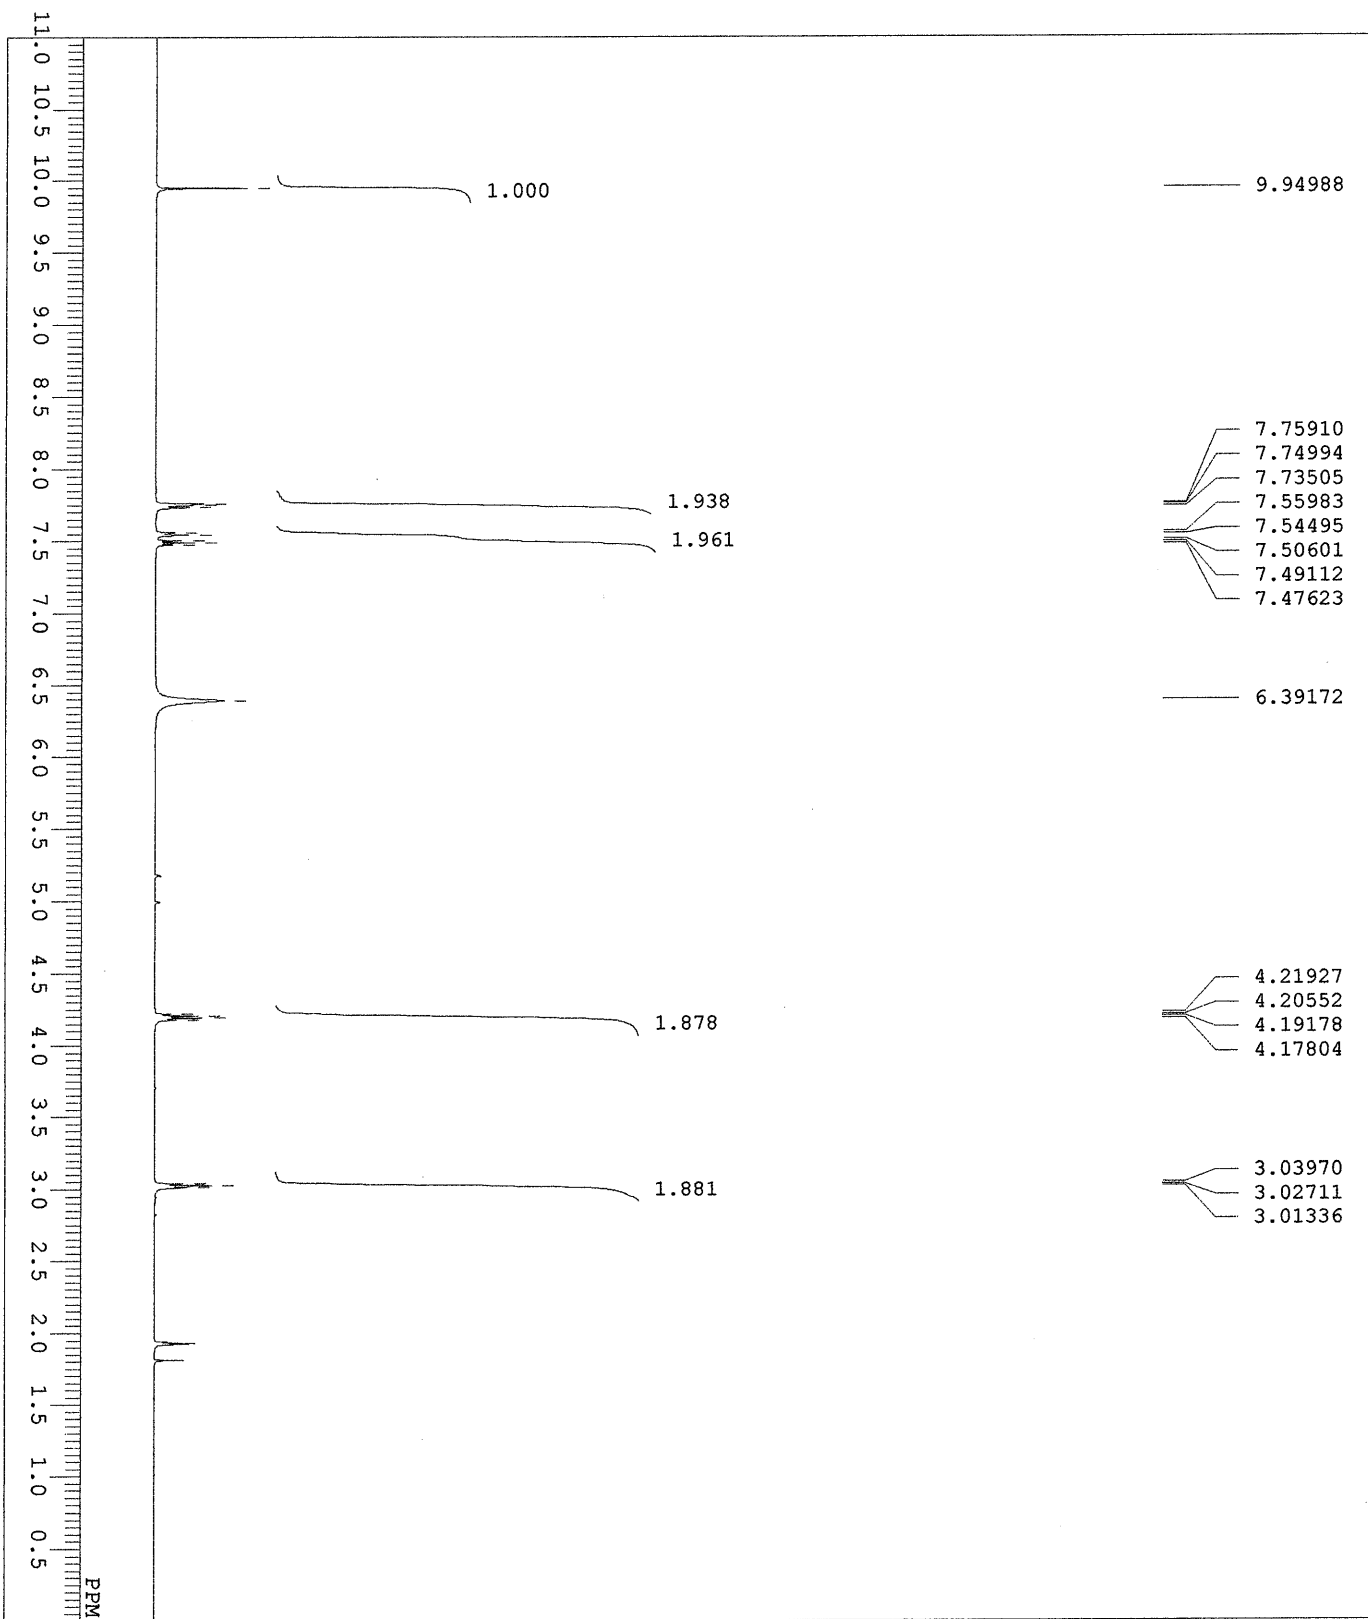

DFILE 18kd3412HPLC4-1-1.a1s  
 COMMENT  
 DATIM 2019-02-01 02:54:45  
 OBNUC 1H  
 EXMOD proton.jxp  
 OBFRO 500.16 MHz  
 OBSET 2.41 KHz  
 OBFIN 6.01 Hz  
 POINT 13107  
 FREQU 7507.51 Hz  
 SCANS 4  
 ACQTM 1.7459 sec  
 PD 6.0000 sec  
 PUL 5.55 usec  
 IRNUC 1H  
 CTEMP 21.6 C  
 SLVNT CD3CN  
 EXREF 1.93 ppm  
 BF 0.12 Hz  
 RGAIN 36

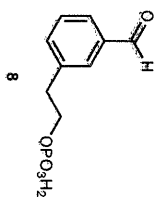

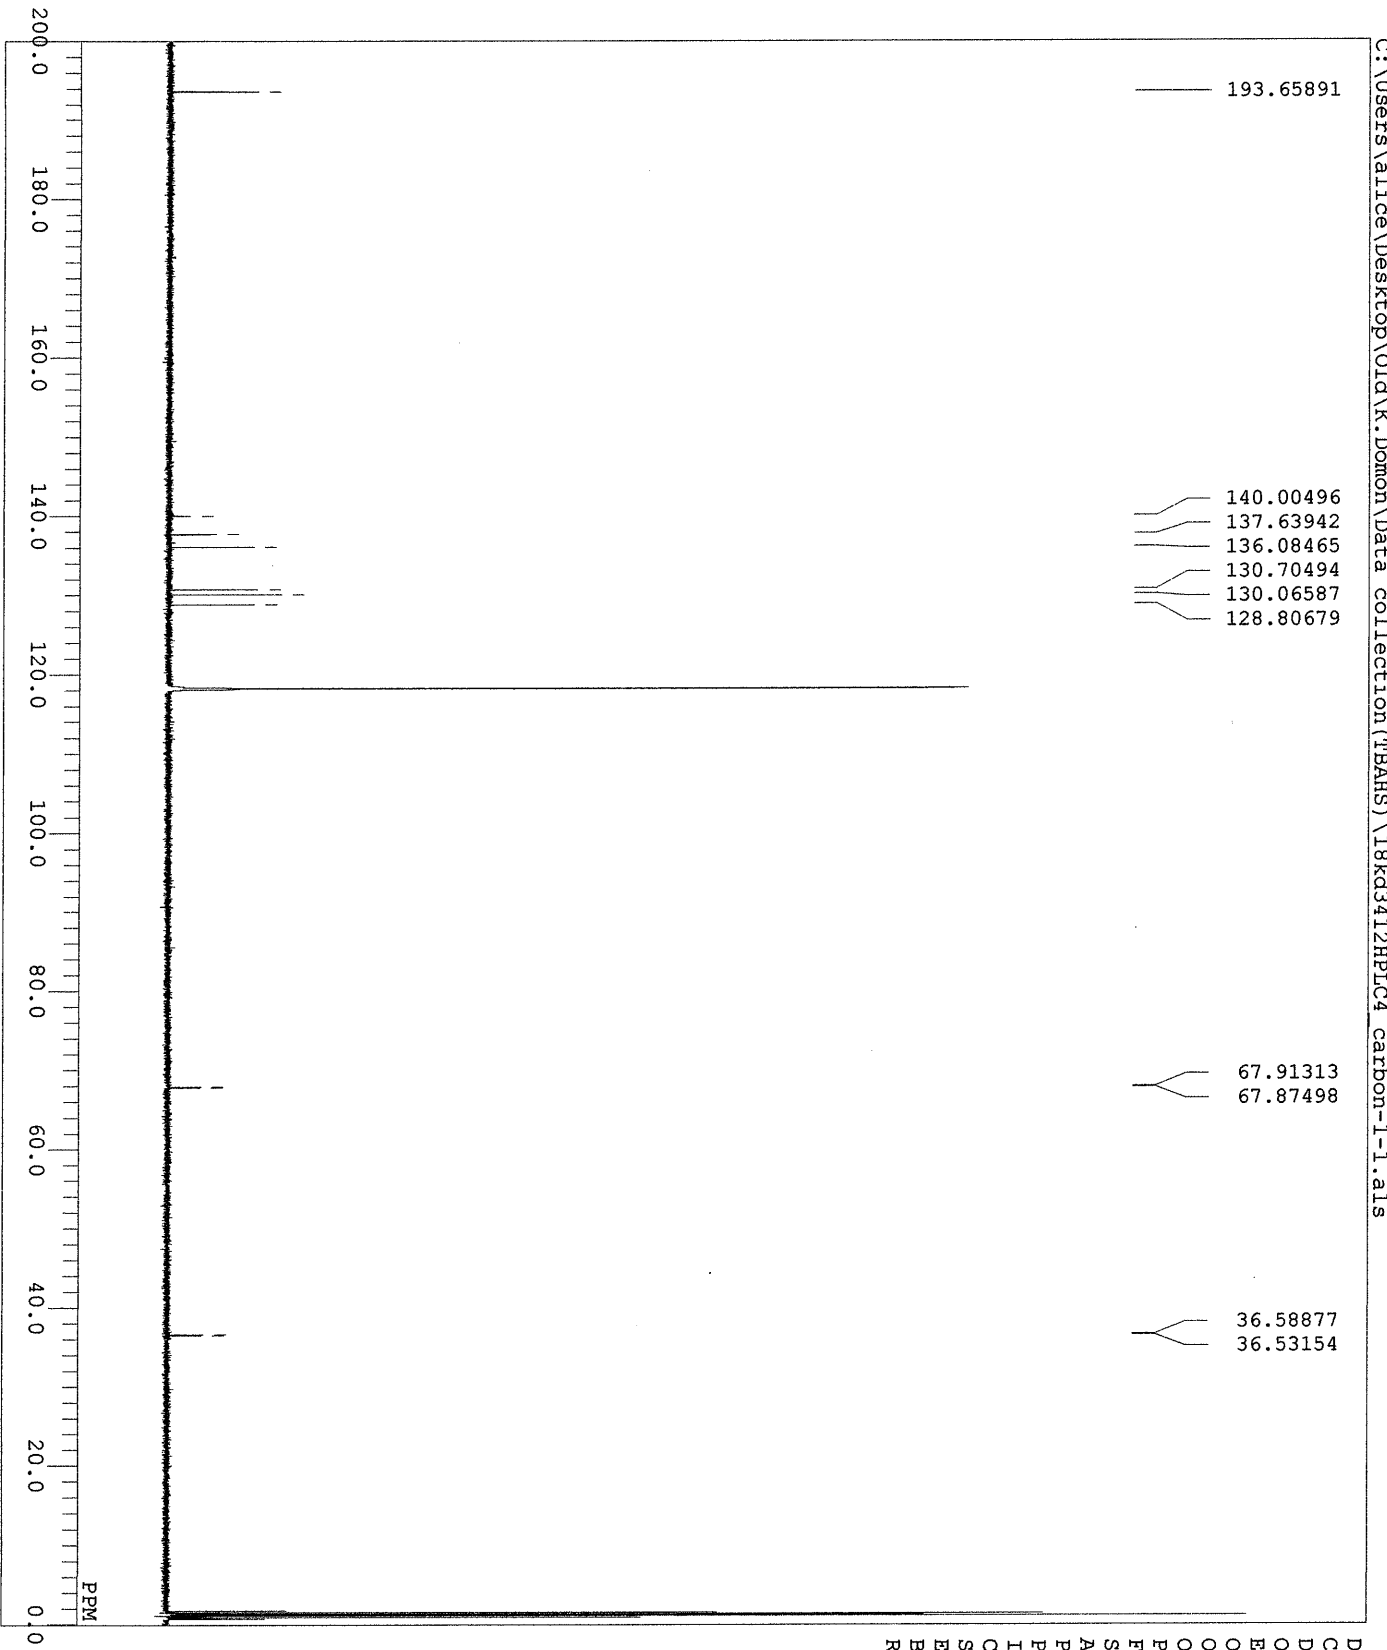

DFILF 18kd3412HPLC4\_carbon-1-1.als  
 COMNT  
 DATIM 2019-02-01 02:55:59  
 OBNUC 13C  
 EXMOD carbon.jxp  
 OBFRO 125.77 MHz  
 OBSRT 7.87 KHz  
 OBFIN 4.21 Hz  
 POINT 26214  
 FREOU 31446.54 Hz  
 SCANS 323  
 ACOTM 0.8336 sec  
 PD 2.0000 sec  
 PW1 3.40 usec  
 IRNUC 1H  
 CTEMP 22.0 C  
 SLVNT CD3CN  
 EXREF 118.20 ppm  
 BF 0.12 Hz  
 RGAIN 60

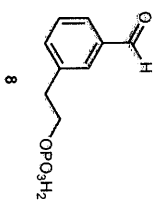

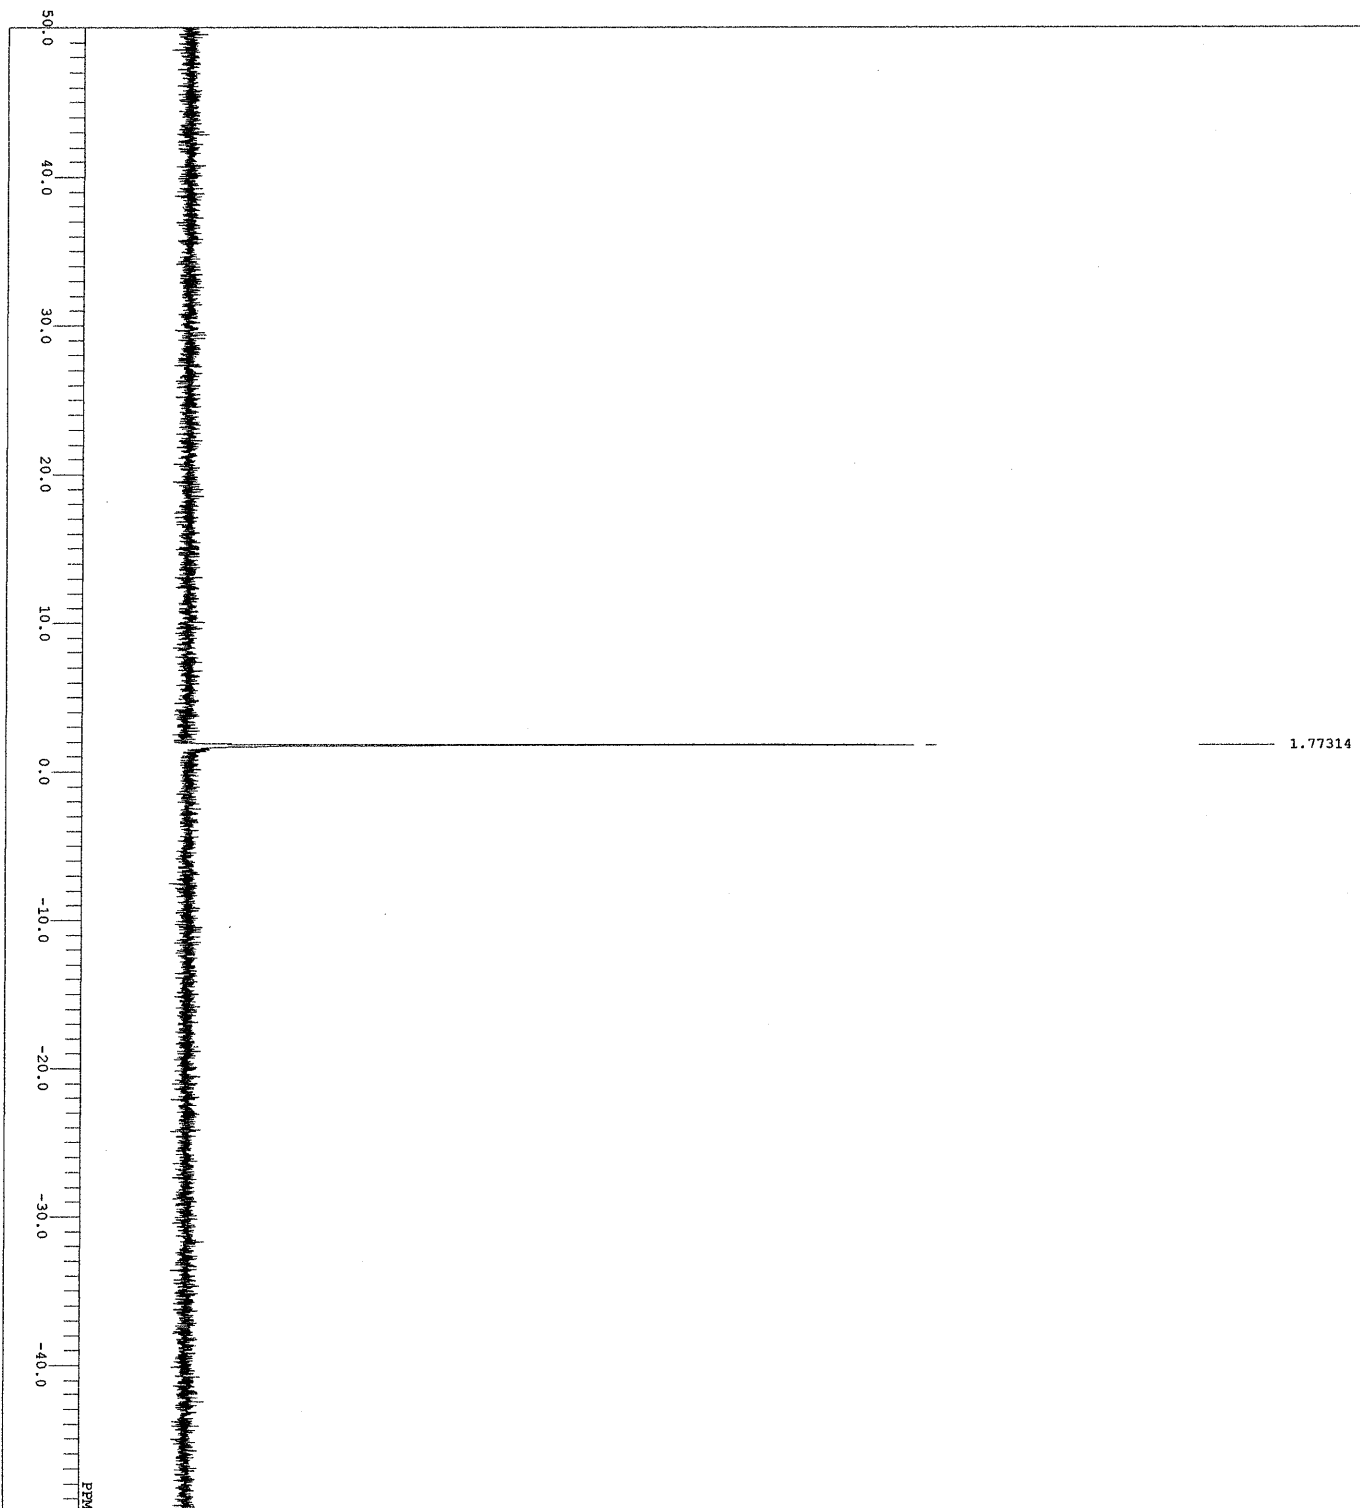

FILE 18kd\_Ald-tm\_P-1-1.ais  
 COMPT 07-03-2019 05:00:51  
 DATEM 07-03-2019 05:00:51  
 ORNTC 31P  
 EXMOD carbon-13p  
 ORPRQ 152.69 MHz  
 OBSFT 7.99 KHz  
 OBSFN 0.23 Hz  
 POINT 26214  
 FREQD 64102.56 Hz  
 SCANS 5  
 ACQTM 0.4089 sec  
 PD 2.0000 sec  
 PWT 4.80 usec  
 IRNTC 1H  
 CTEMP 19.9 c  
 SIVMT CD30D  
 EXREF 0.00 ppm  
 BF 0.12 Hz  
 RGAIN 56

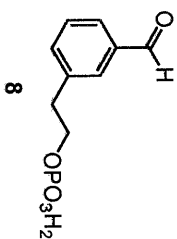

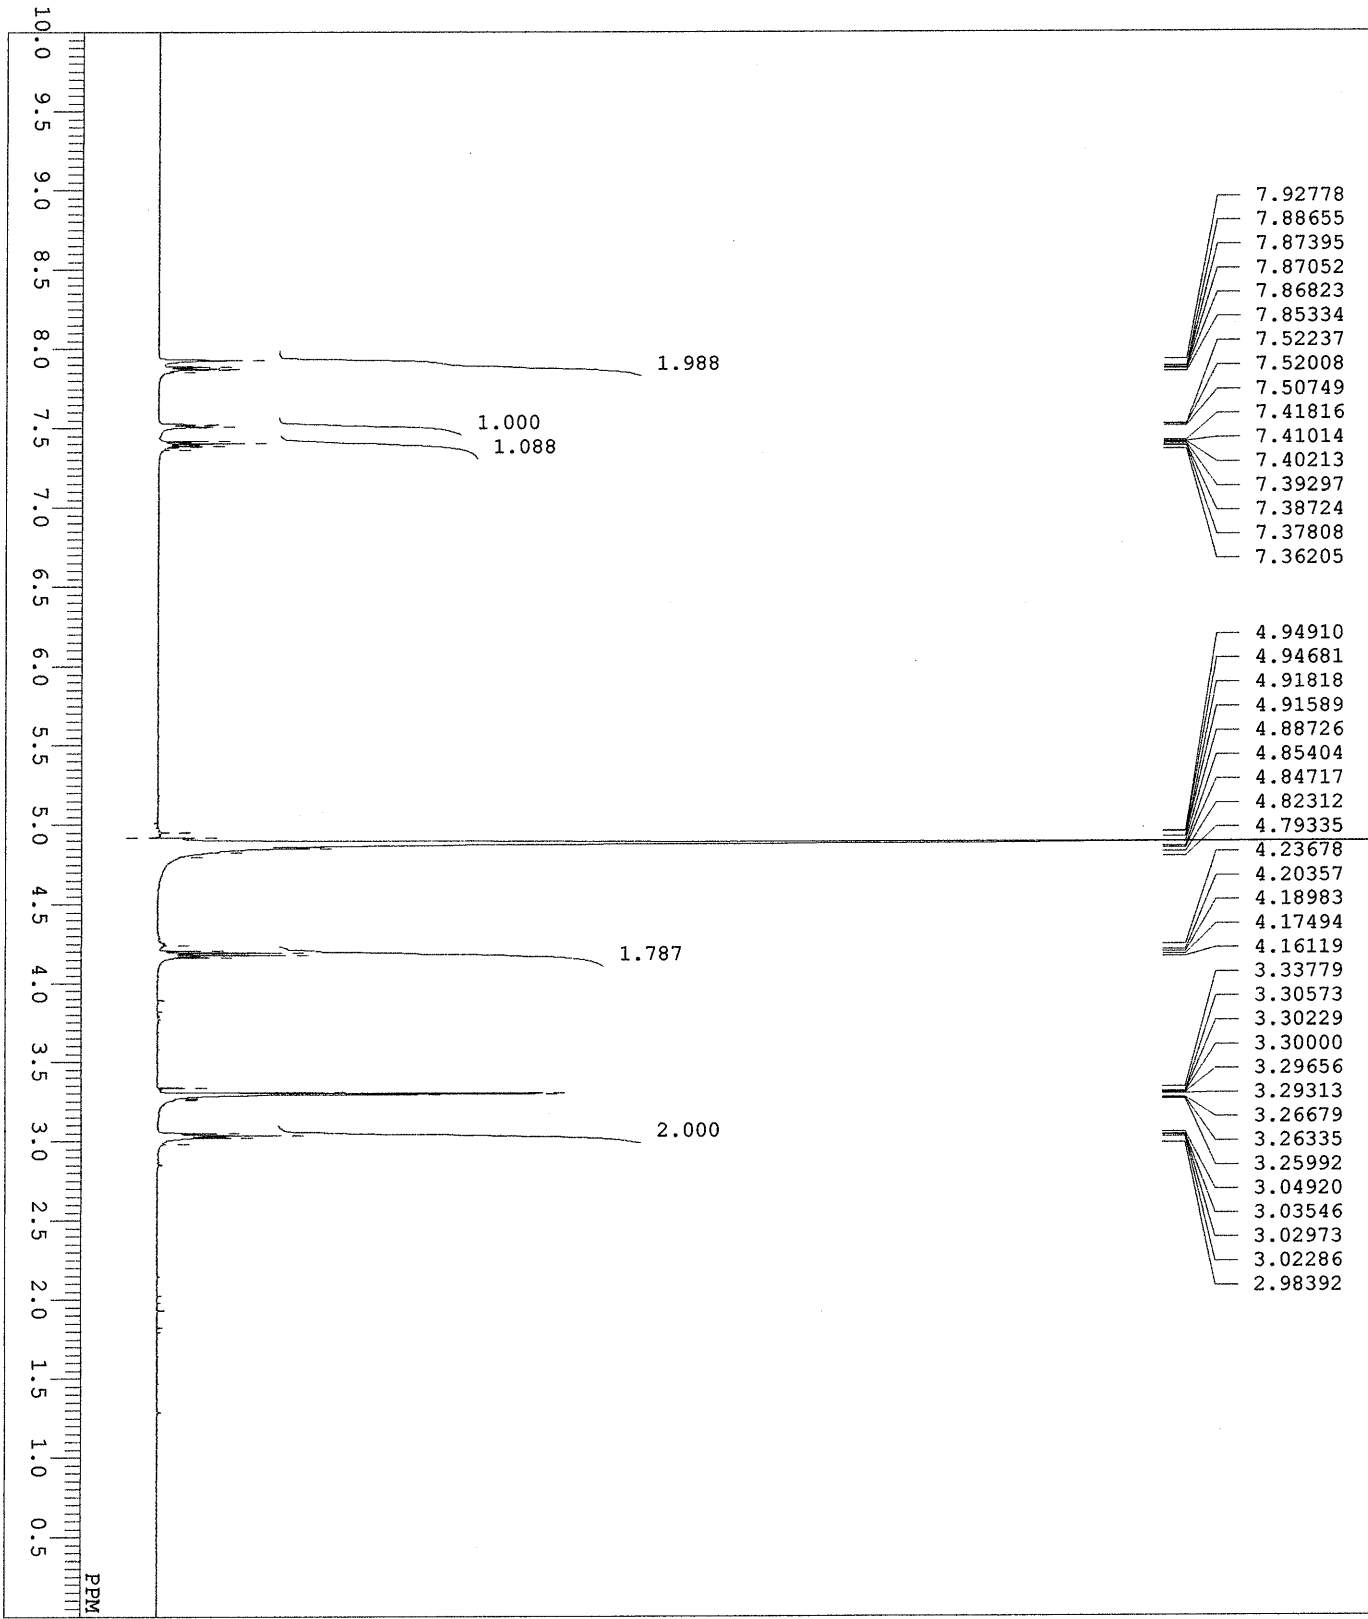

DFIL 18kd3081HPLCI-1-1.als  
 COMNT 2018-09-04 01:59:37  
 DATIM 1H  
 OBNUC 1H  
 EXMOD proton.jxp  
 OBFRO 500.16 MHz  
 OBSSET 2.41 KHz  
 OBFIN 6.01 Hz  
 POINT 13107  
 FREQU 7507.51 Hz  
 SCANS 7  
 ACQTM 1.7459 sec  
 PD 5.0000 sec  
 PW1 5.55 usec  
 IRNUC 1H  
 CTEMP 21.7 c  
 SLVNT CD3OD  
 EXREF 3.30 ppm  
 BF 0.12 Hz  
 RGAIN 30

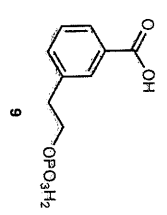

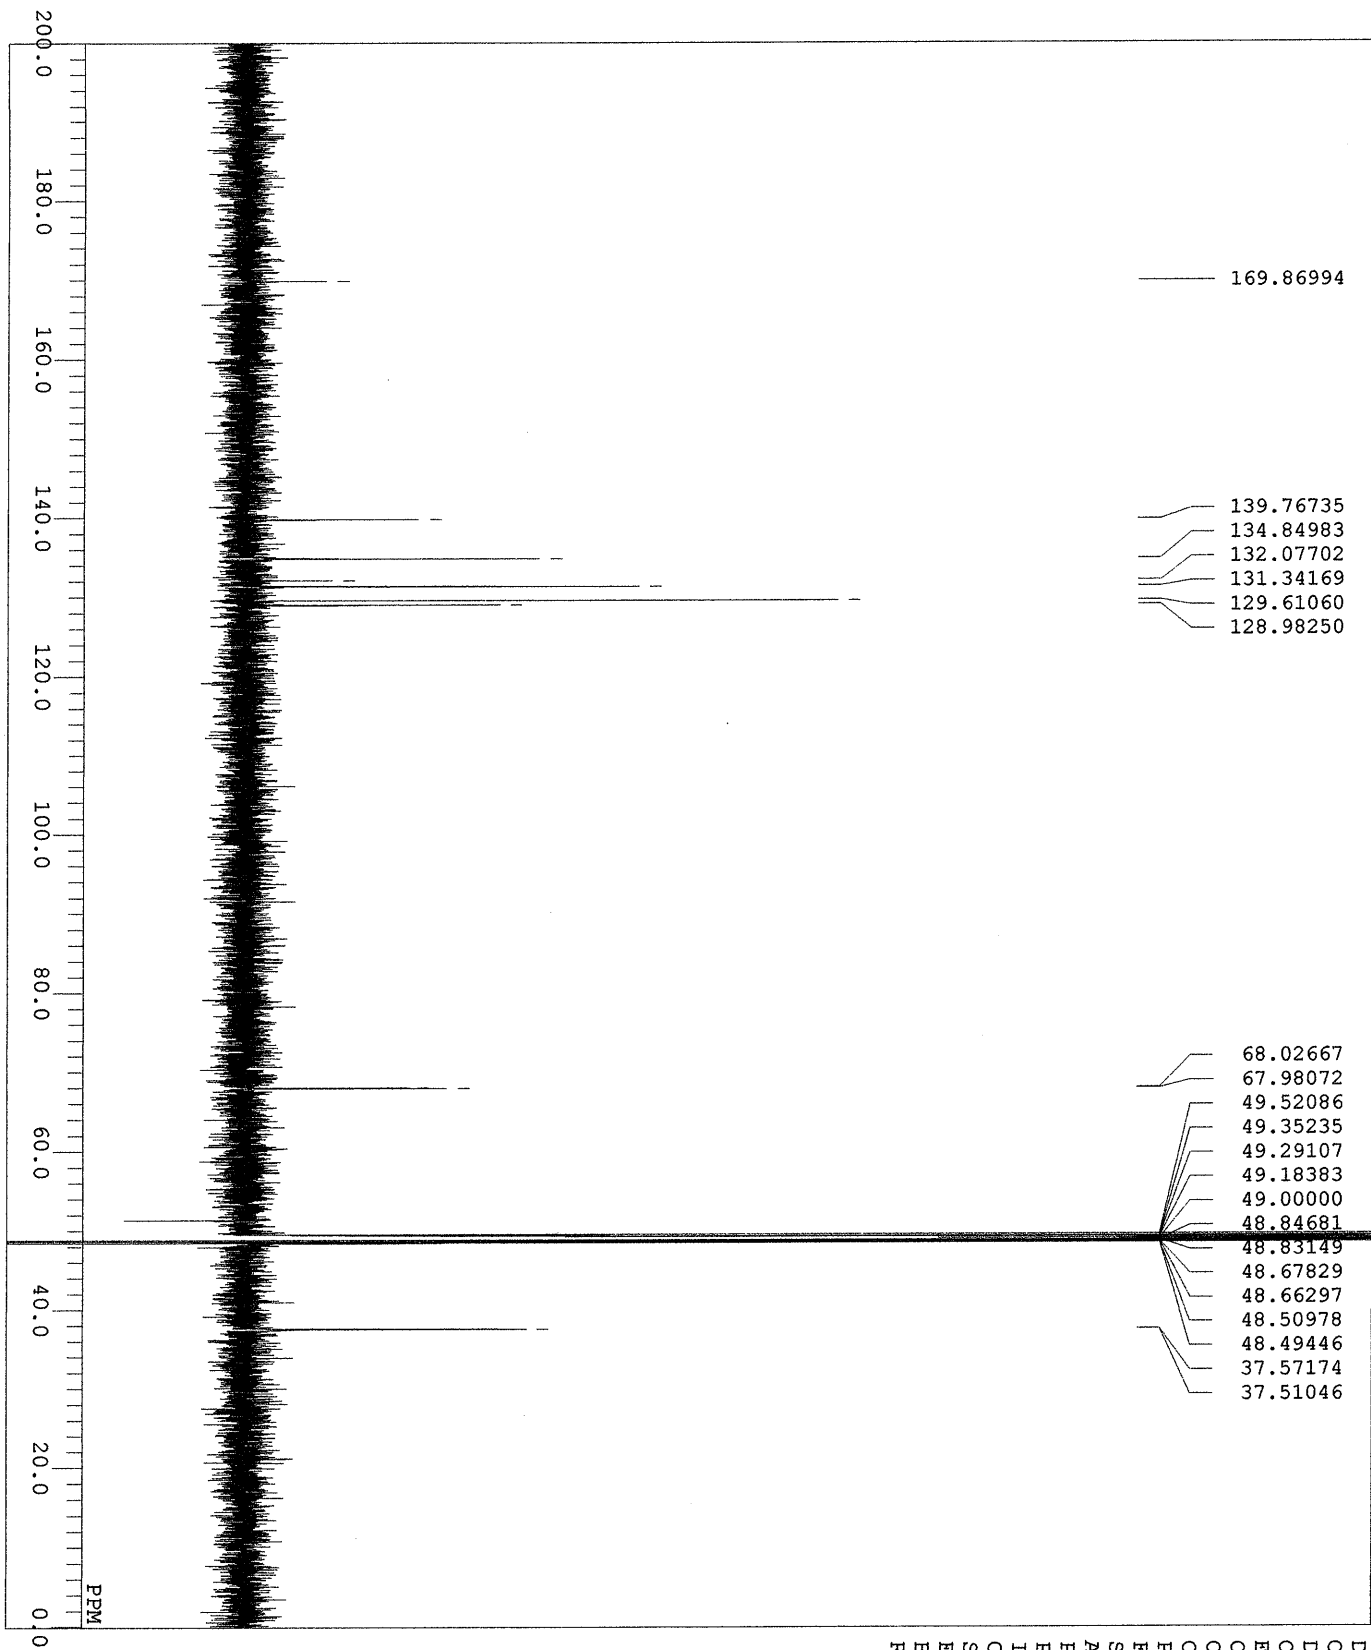

DFIL 18kd3081HPIC1\_carbon-1-1.als  
 COMMENT 2018-09-04 02:06:54  
 DATIM 13C  
 OBNUC carbon.fxp  
 EXMOD 125.77 MHz  
 OBFRO 1.58 KHz  
 OBSET 5.95 Hz  
 OBFIN 26214  
 POINT 50505.05 Hz  
 FREQ 6201  
 SCANS 0.5190 sec  
 ACQTM 2.0000 sec  
 PD 3.40 usec  
 PW1 1H  
 IRNUC 22.4 C  
 CTEMP CD3OD  
 SLVNT 49.00 ppm  
 EXREF BF 0.12 Hz  
 RGAIN 60

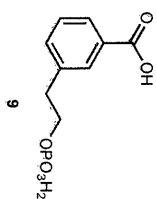

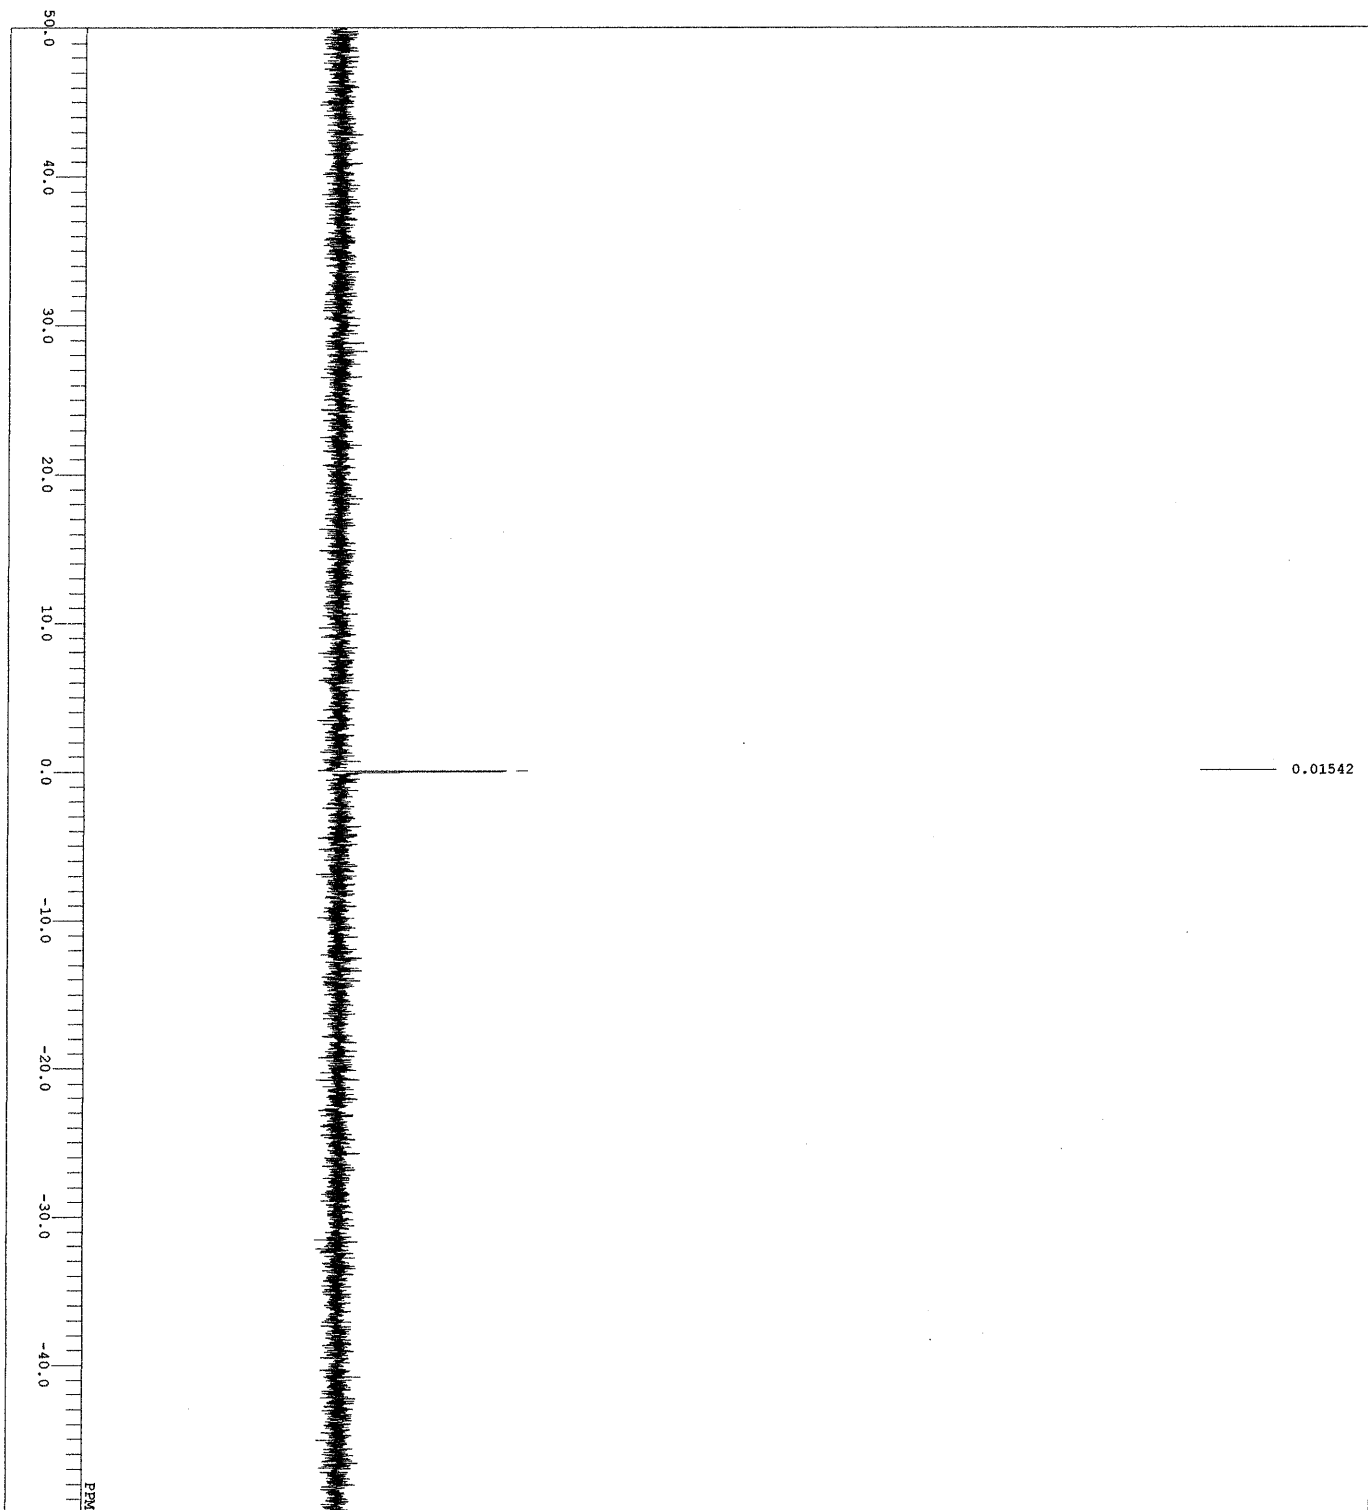

```

DETE 18kd3081HPLC1_P-1-1.als
COMN 04-09-2018 07:09:38
DATE
NAME
EXNO 31P
EXID carbon-13p
OBSRQ 158.59 MHz
OBSF 7.99 KHz
OBSIN 9.23 Hz
POINT 26214
FREQ 64102.56 Hz
SCANS 5
ACQTM 0.4089 sec
PD 2.0000 sec
PWL 4.80 usec
IRN1C 1H
CTEMP 20.1 c
SIVNT CD3OD
EXREF 0.00 ppm
BF 0.12 Hz
RGAIN 56
    
```

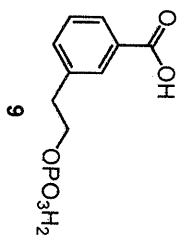

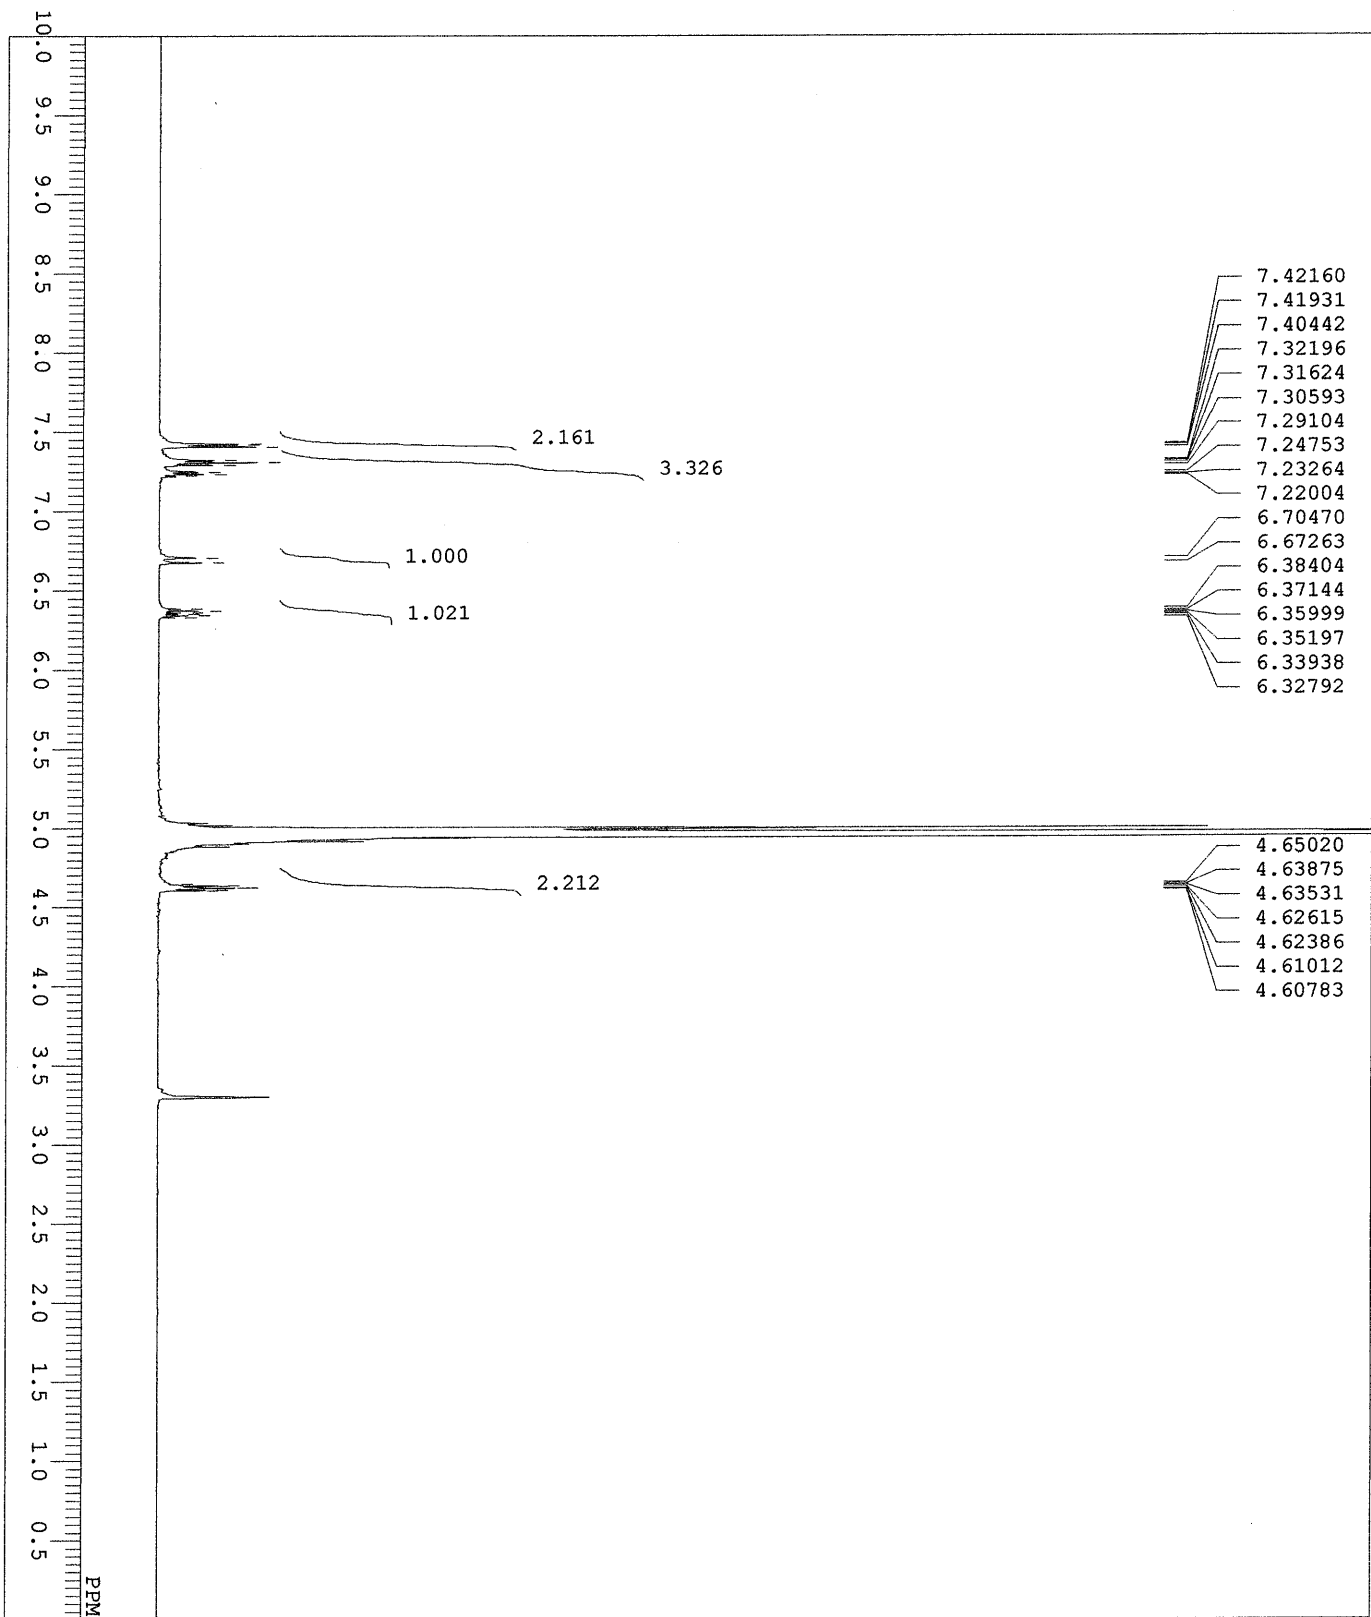

DEFILE 18kd3457HPLC3-1-1.als  
 COMNT 2019-03-13 00:06:17  
 DATIM 1H  
 OBNUC 1H  
 EXMOD proton.fxp  
 OBFRO 500.16 MHz  
 OBSSET 2.41 KHz  
 OBFIN 6.01 Hz  
 POINT 13107  
 FREQU 7507.51 Hz  
 SCANS 4  
 ACQTM 1.7459 sec  
 PD 6.0000 sec  
 PW1 5.55 usec  
 IRNUC 1H  
 CTEMP 21.4 C  
 SLVNT CD3OD  
 EXREF 3.30 ppm  
 BF 0.12 Hz  
 RGAIN 26

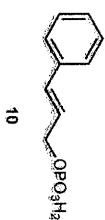



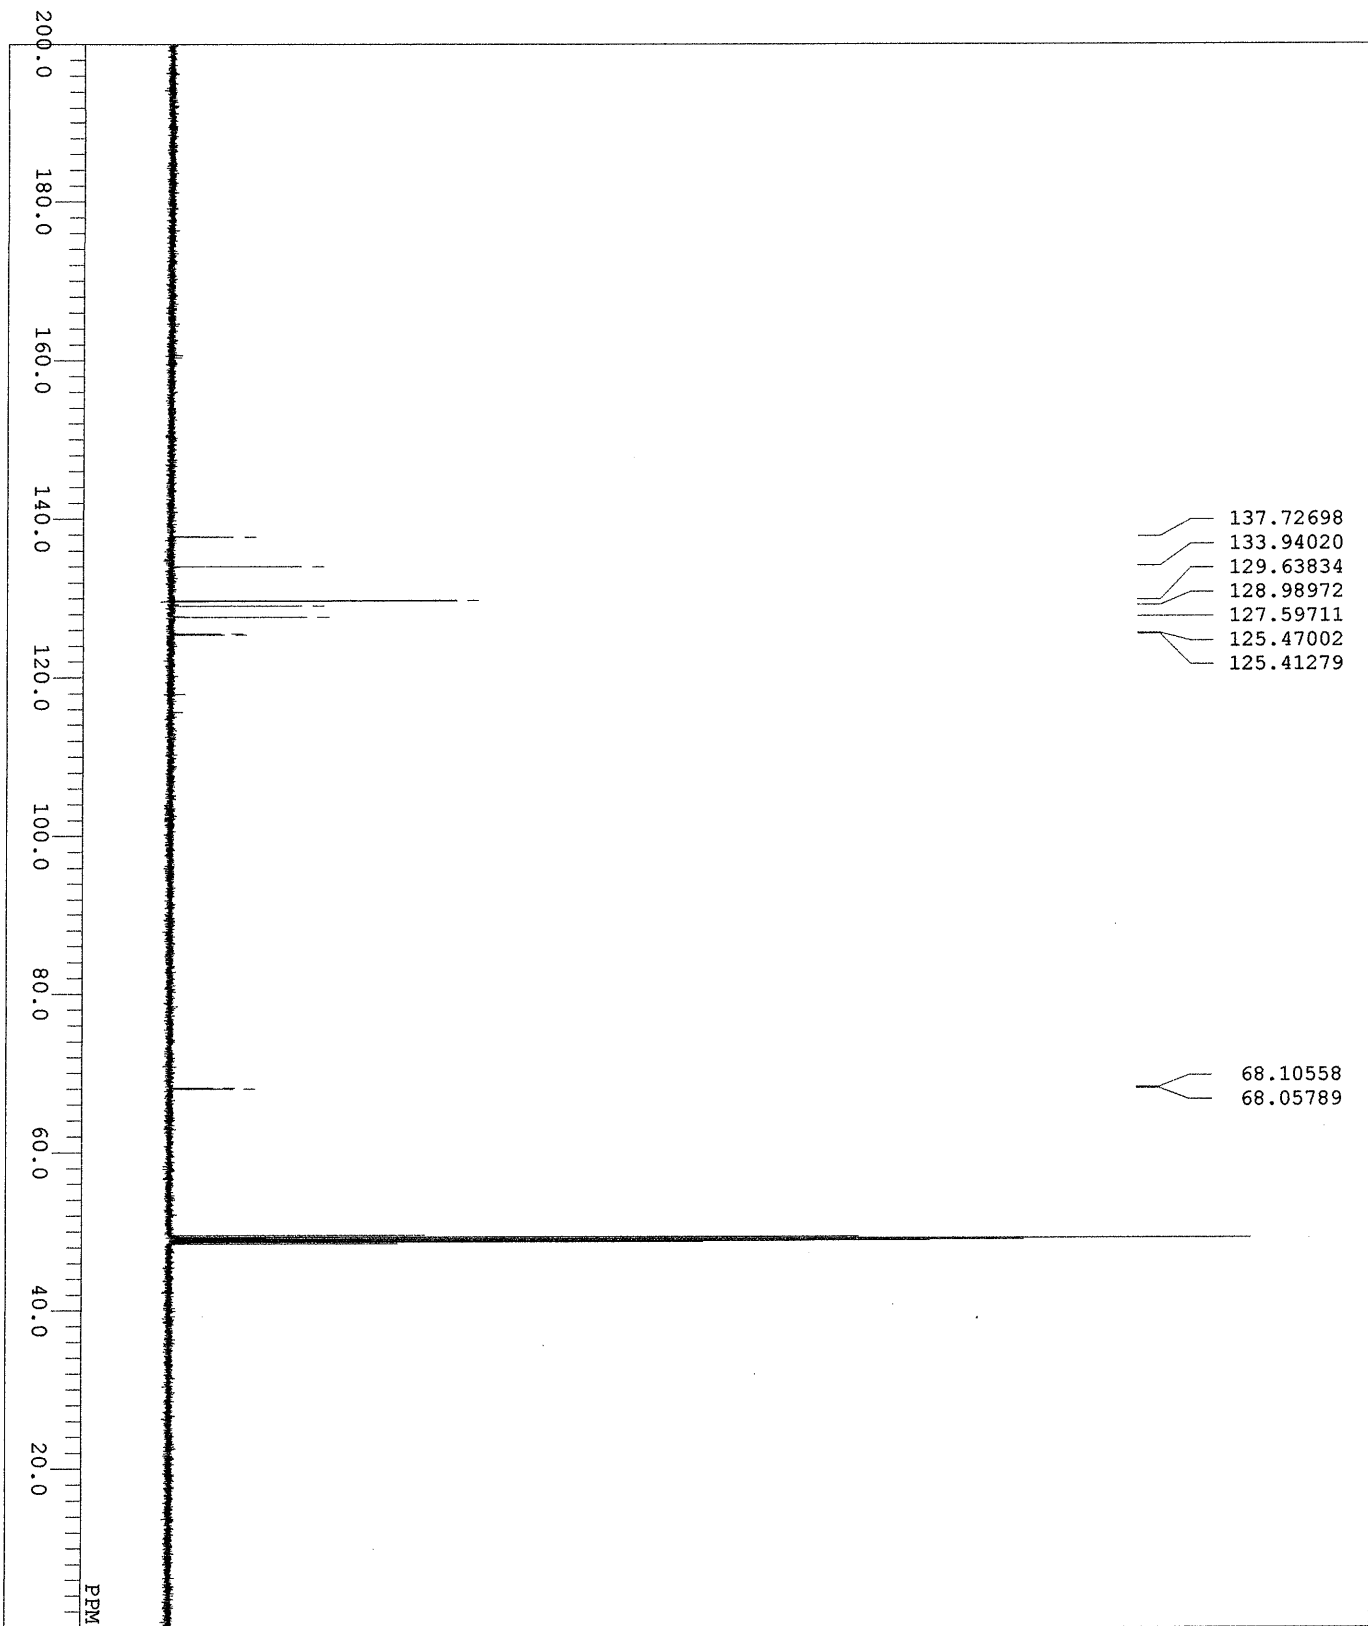

DFILE 18k3457HPLC3\_carbon-1-1.als  
 COMMENT  
 DATIM 2019-03-13 00:16:29  
 OBNUC 13C  
 EXMOD carbon.jxp  
 OBFRO 125.77 MHz  
 OBSET 7.87 KHz  
 OBFIN 4.21 Hz  
 POINT 26214  
 FREQU 31446.54 Hz  
 SCANS 1656  
 ACQTM 0.8336 sec  
 PD 2.0000 sec  
 PW1 3.40 usec  
 IRNUC 1H  
 CTEMP 21.9 c  
 SIVNT CD3OD  
 EXREF 49.00 ppm  
 BF 0.12 Hz  
 RGAIN 60

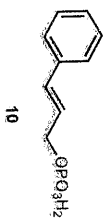

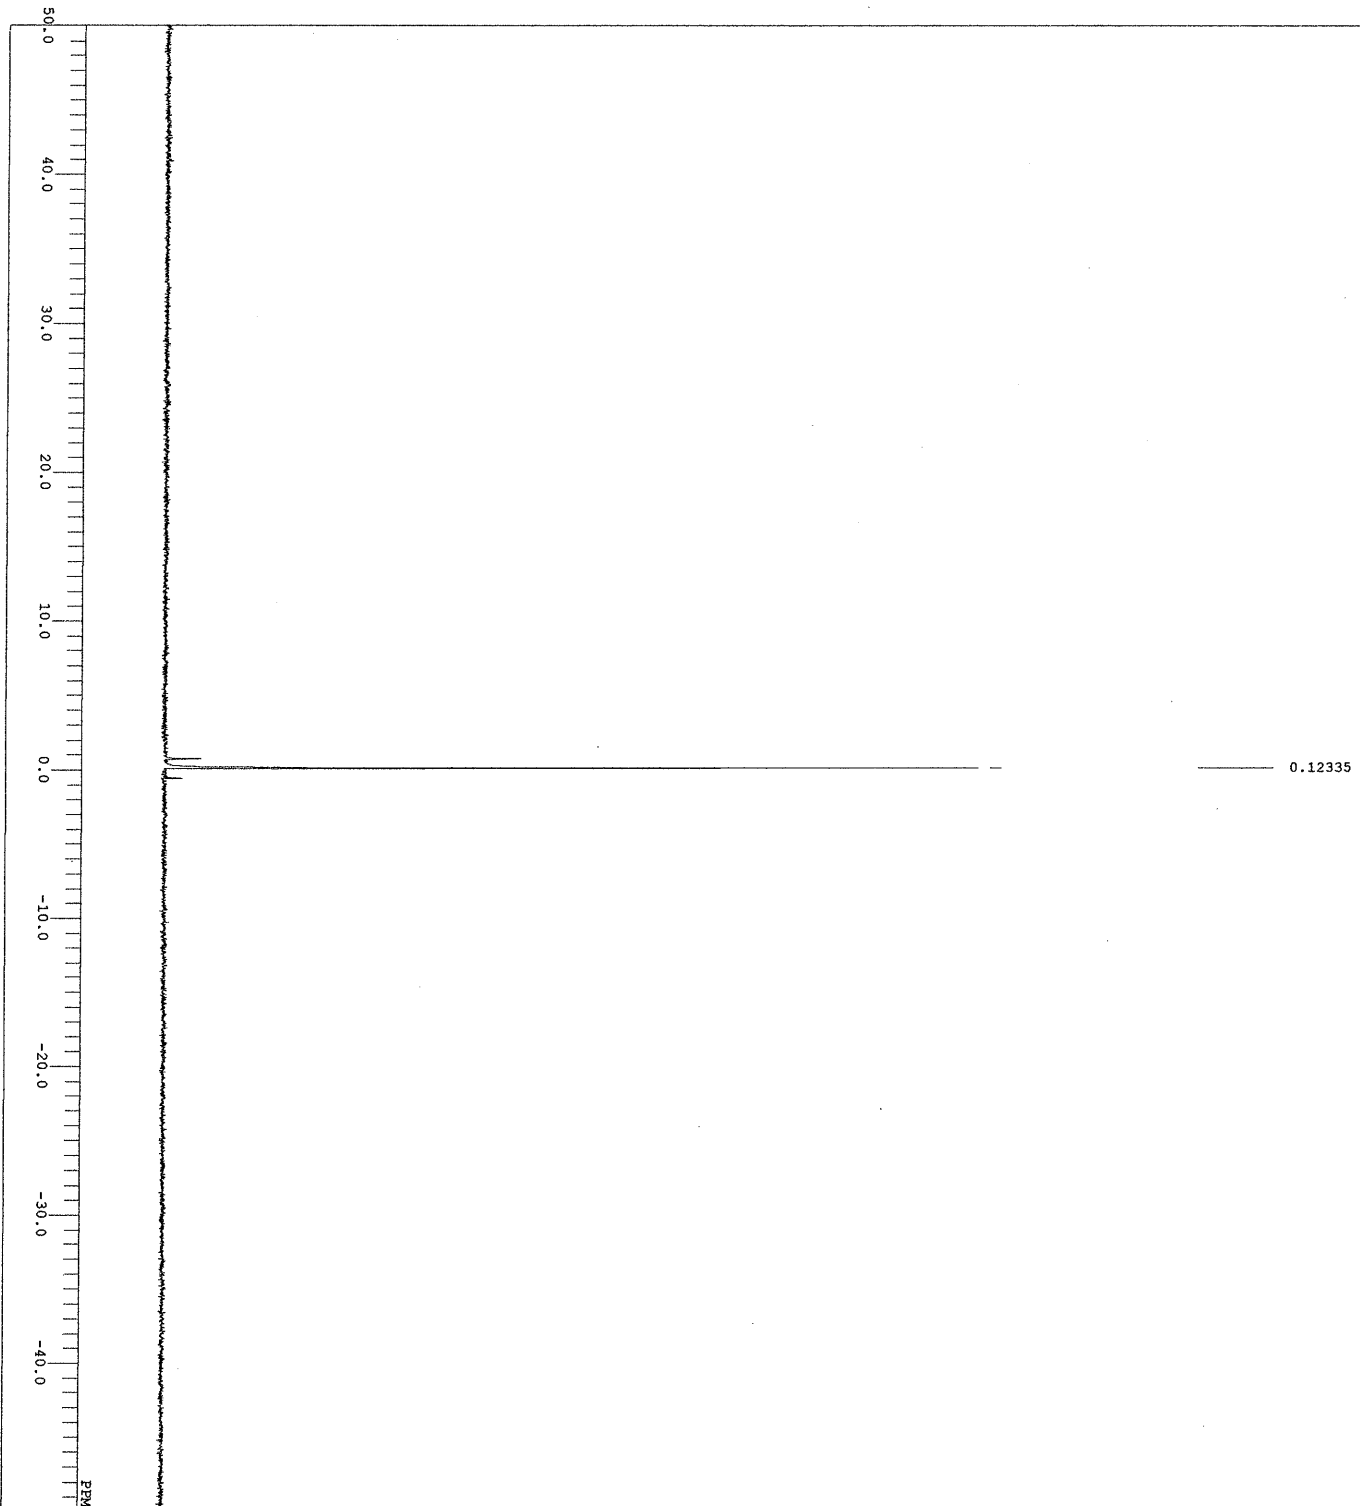

FILE 18K3457HPLC3\_P-1-1.als  
 COMMENT  
 DATE 13-03-2019 00:49:53  
 ORIGIN 31P  
 EXMETH carbon\_13p  
 OBSER 159.59 MHz  
 OBSER 7.59 MHz  
 POINT 28214  
 FREQ 64102.56 Hz  
 SCANS 29  
 ACQTM 0.4089 sec  
 PD 2.0000 sec  
 PULP 4.80 usec  
 INTC 1H  
 TEMPC 19.7 c  
 SLEW CD30D  
 EXREF 0.00 ppm  
 BF 1.20 Hz  
 RGAIN 56

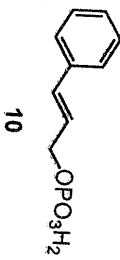

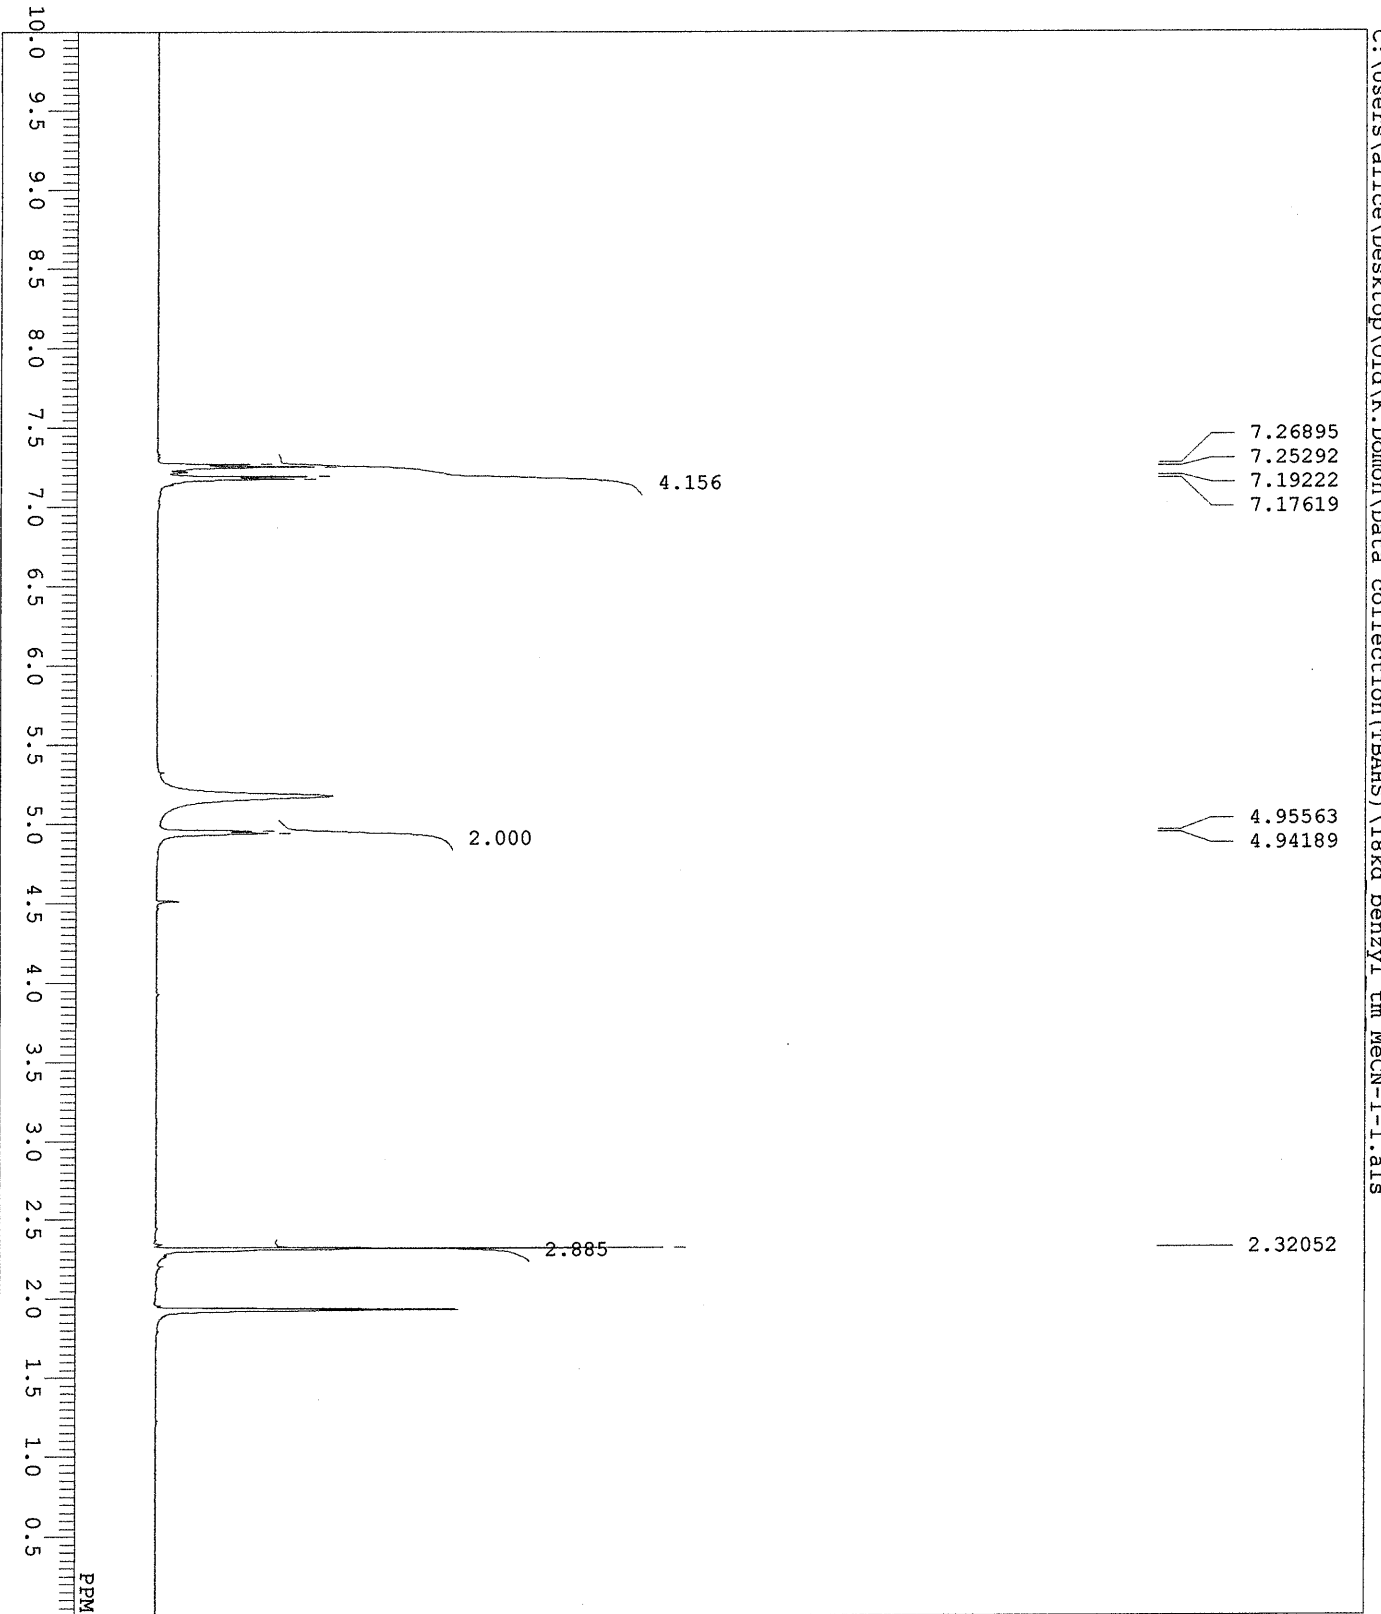

18kd\_benzyl\_tm\_MeCN-1-1.als  
 2019-03-20 00:46:47  
 1H  
 proton.fxp  
 500.16 MHz  
 2.41 KHz  
 6.01 Hz  
 13107  
 7507.51 Hz  
 5  
 1.7459 sec  
 6.0000 sec  
 5.55 usec  
 1H  
 21.5 c  
 CD3CN  
 1.93 ppm  
 0.12 Hz  
 40  
 RGAIN

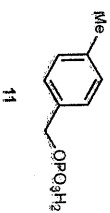

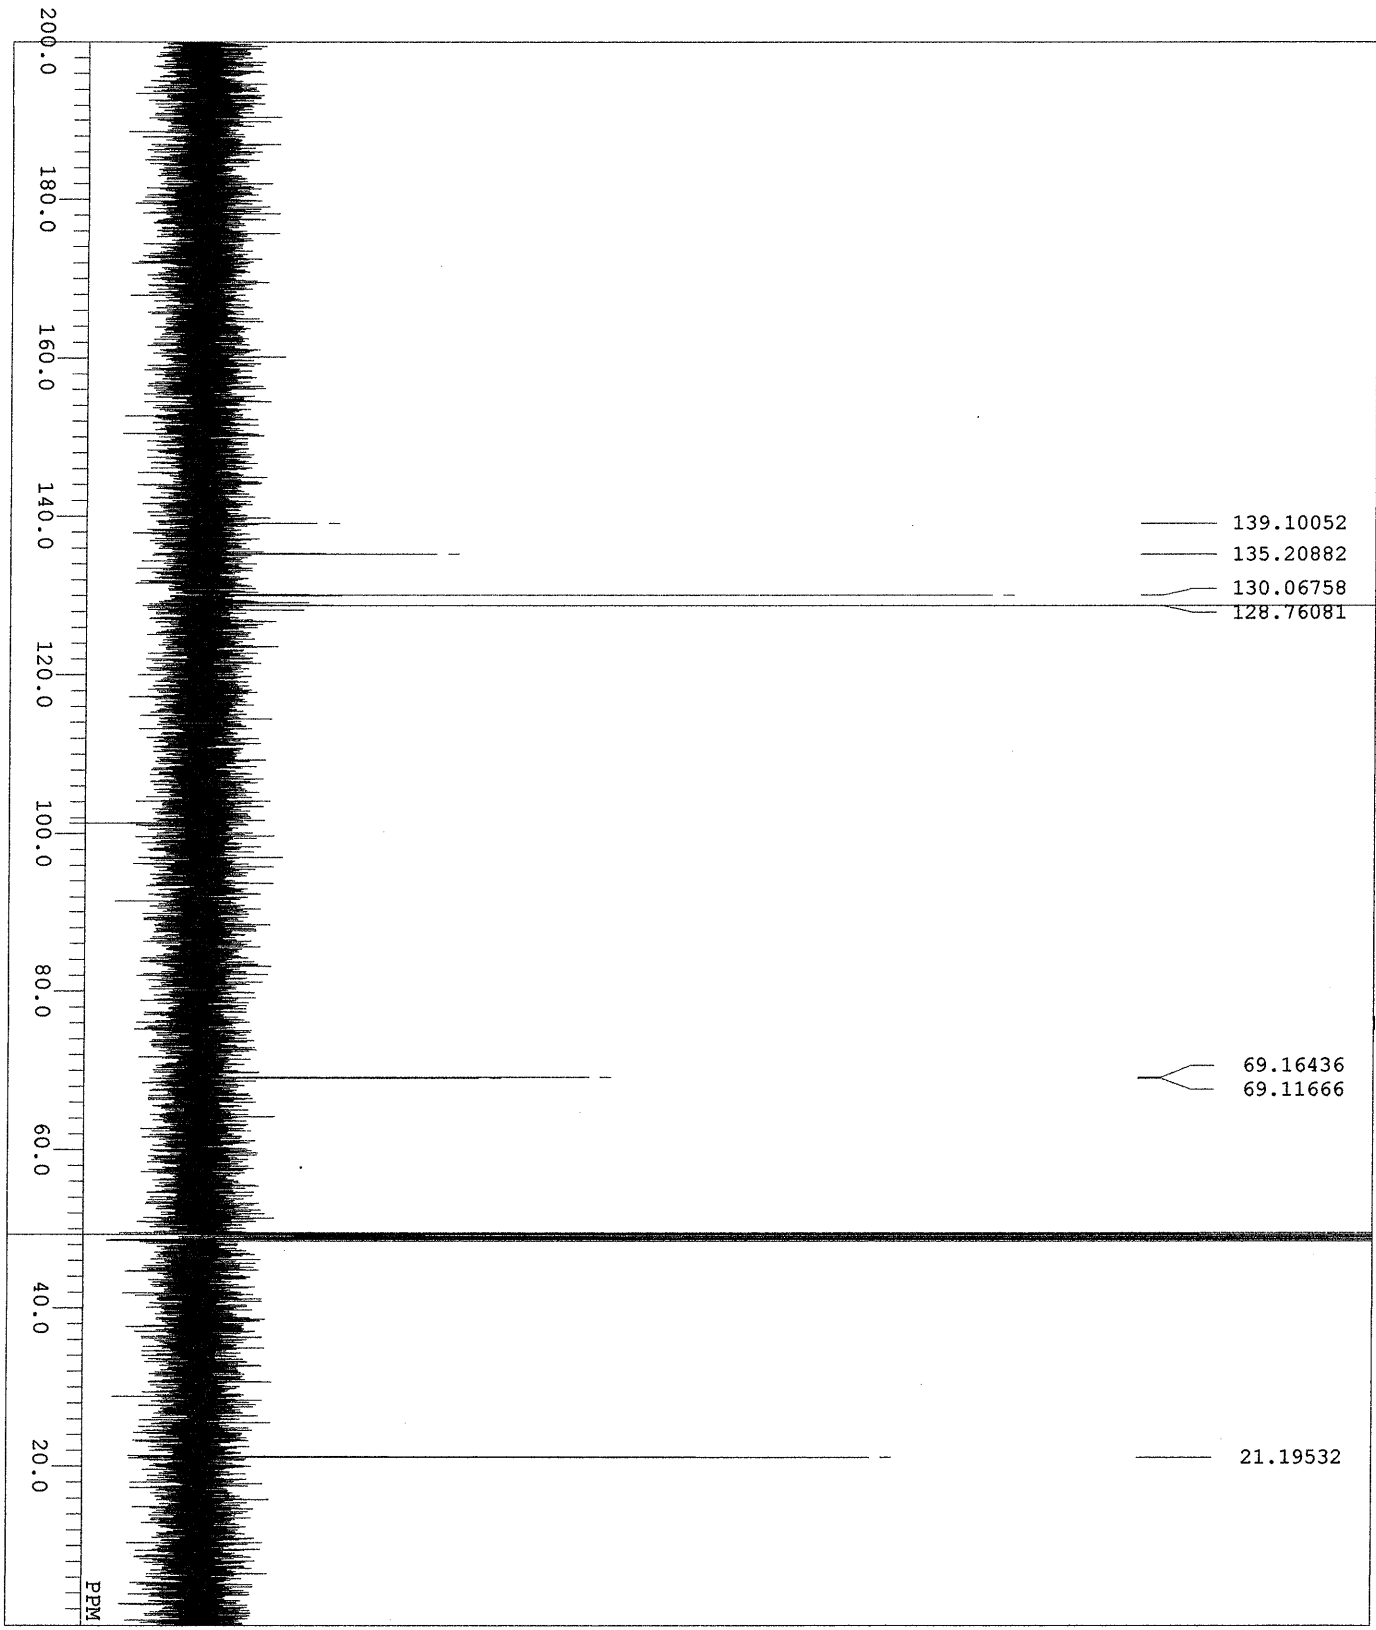

DEFIL 18kd3413HPLC3\_carbon-1-1.als  
 COMMENT 2019-02-01 05:02:49  
 DATIM 13C  
 OBNUC carbon.jxp  
 EXMOD 125.77 MHz  
 OBFRO 7.87 KHz  
 OBSSET 4.21 Hz  
 OBFIN 26214  
 POINT 31446.54 Hz  
 FREOU 249  
 SCANS 0.8336 sec  
 ACQTM 2.0000 sec  
 PD 3.40 usec  
 PW1 1H  
 IRNUC 22.1 c  
 CTEMP CD3OD  
 SLVNT 49.00 ppm  
 EXREF BF 0.12 Hz  
 RGAIN 60

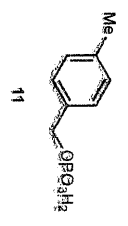

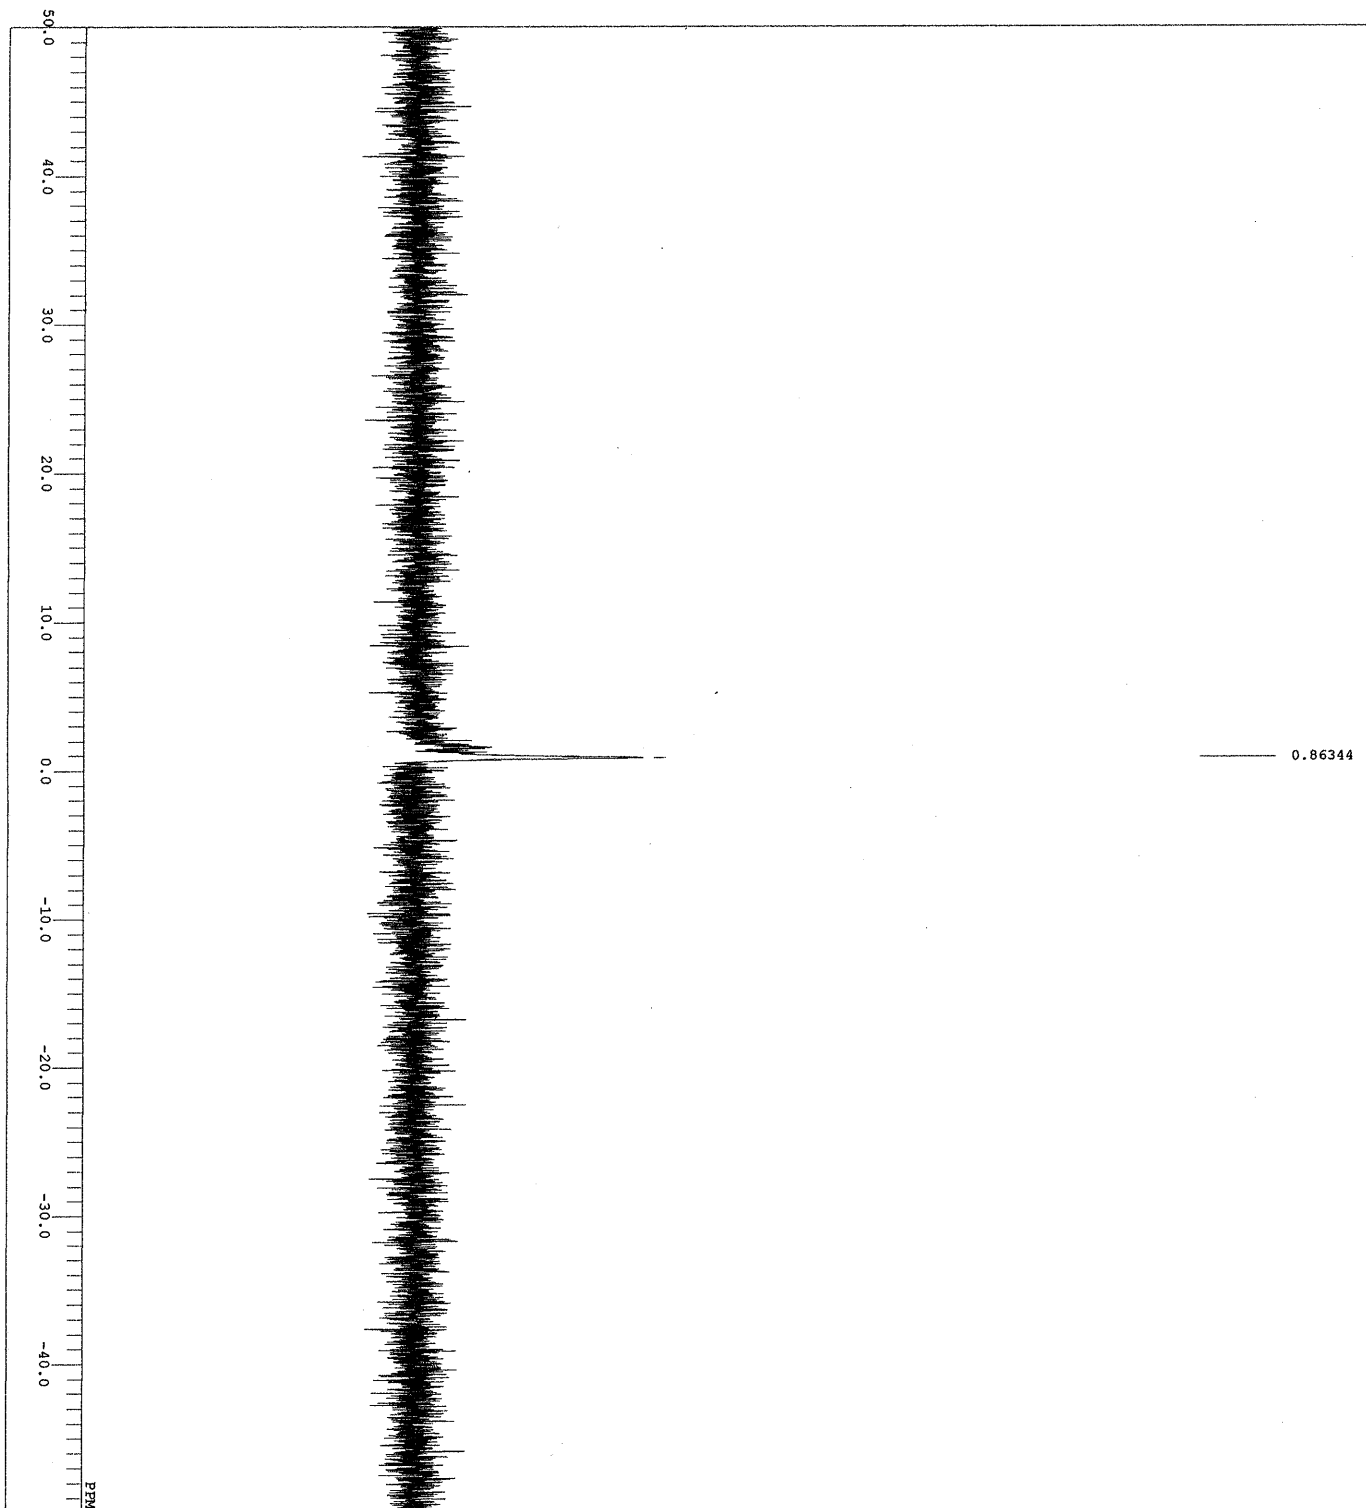

DFILE 18kd\_benzyl\_tm\_P\_MeCN-1-1.als  
 COMNT 20-03-2019 01:33:49  
 DRYTM 31P  
 ORNDU carbon-13p  
 EXMOC 158.59 MHz  
 OBFRO 7.99 KHz  
 OBSER 9.23 Hz  
 OBTIN 26214  
 POINT 64102.56 Hz  
 FREQU 21  
 SCANS 0.4089 sec  
 ACQTM 2.0000 sec  
 PD 4.80 usec  
 PVL 19.7 C  
 IRNTC 0.00 ppm  
 CTEMP 0.12 Hz  
 SLYM 36  
 PPRF  
 BR  
 RGAIN

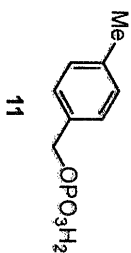

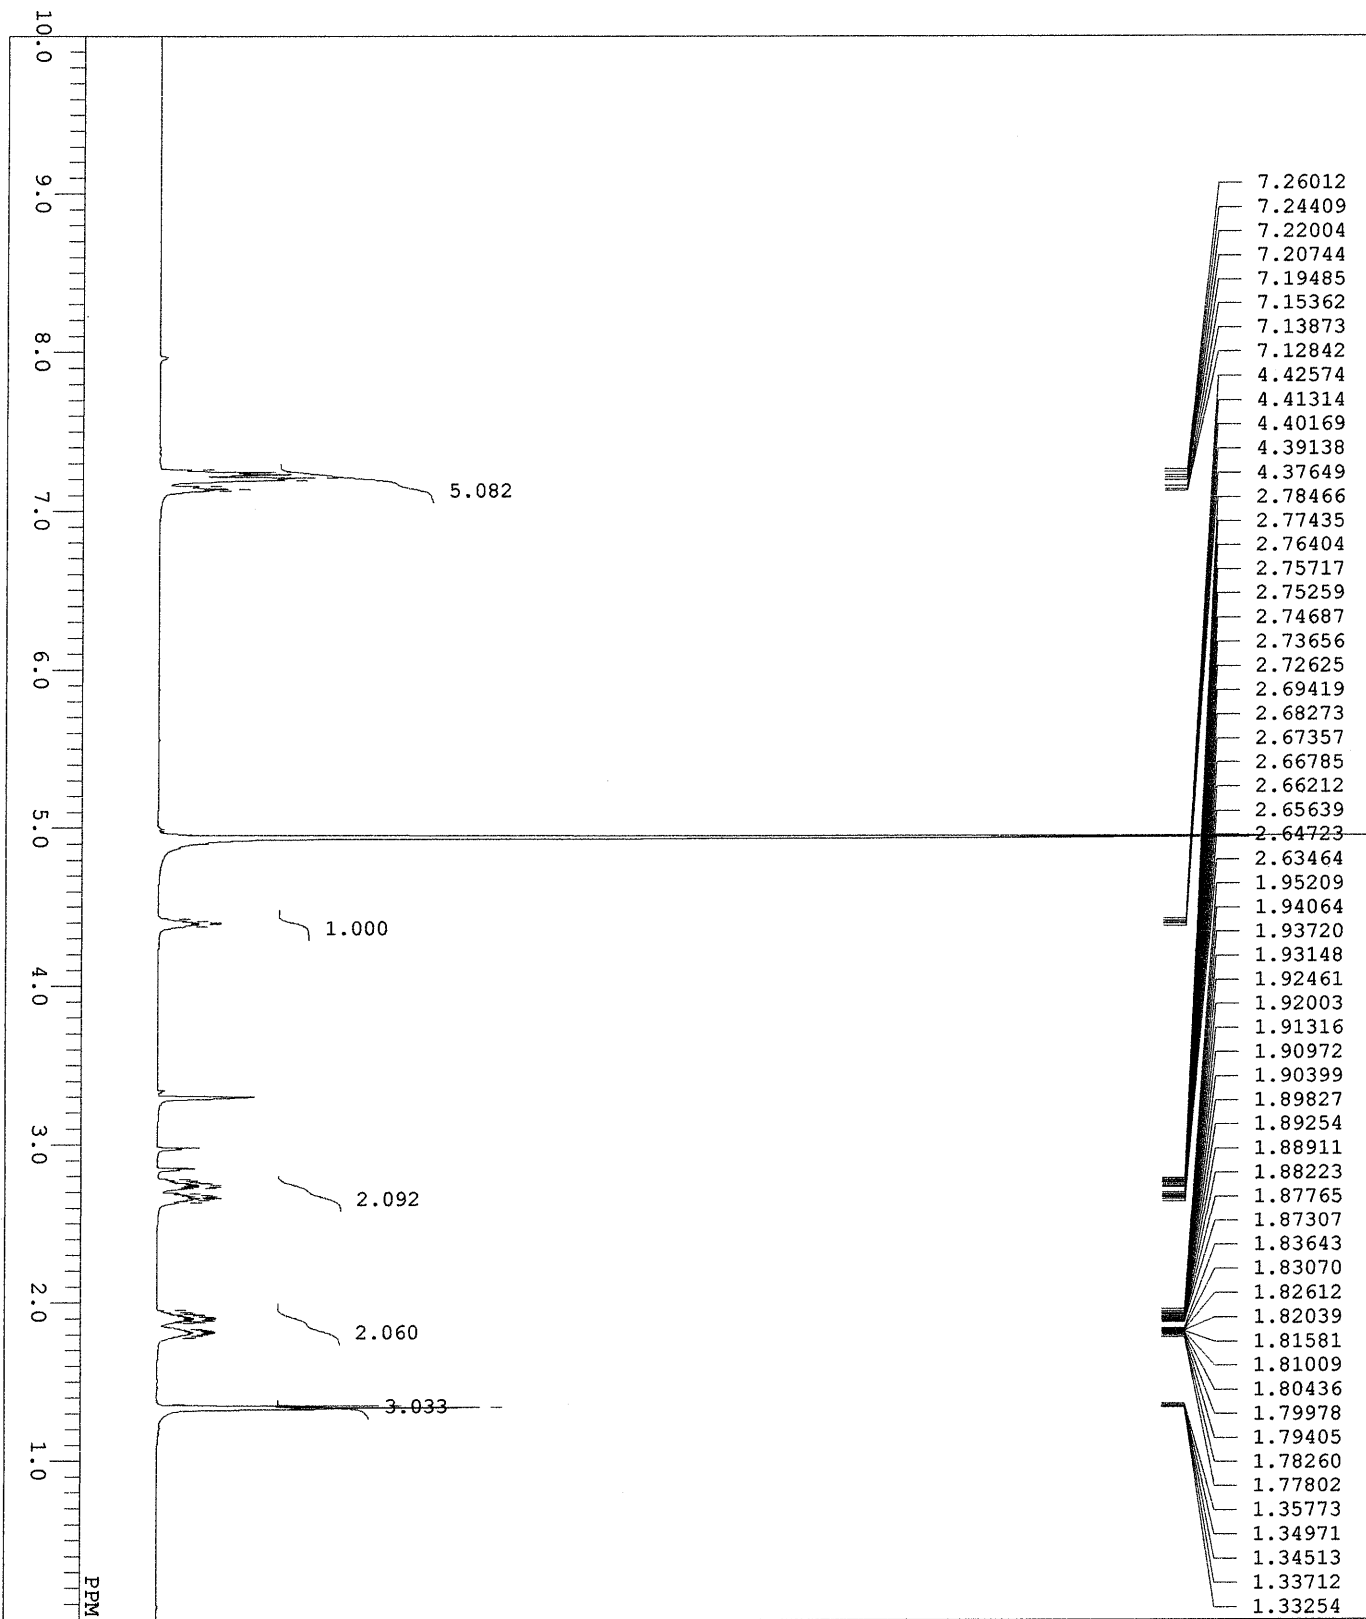

DEFILE 18kd3074HPLC3-1-1.als  
 COMNT 2018-09-01 03:02:12  
 DATIM 1H  
 OBNUC 1H  
 EXMOD proton.fxp  
 OBFRO 500.16 MHz  
 OBSST 2.41 KHz  
 OBFIN 6.01 Hz  
 POINT 13107  
 FREQOU 7507.51 Hz  
 SCANS 8  
 ACQTM 1.7459 sec  
 PD 5.0000 sec  
 PW1 5.55 usec  
 IRNUC 1H  
 CTEMP 21.2 c  
 SLVNT CD3OD  
 EXREF 3.30 ppm  
 BF 0.12 Hz  
 RGAIN 30

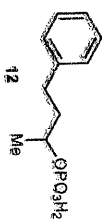

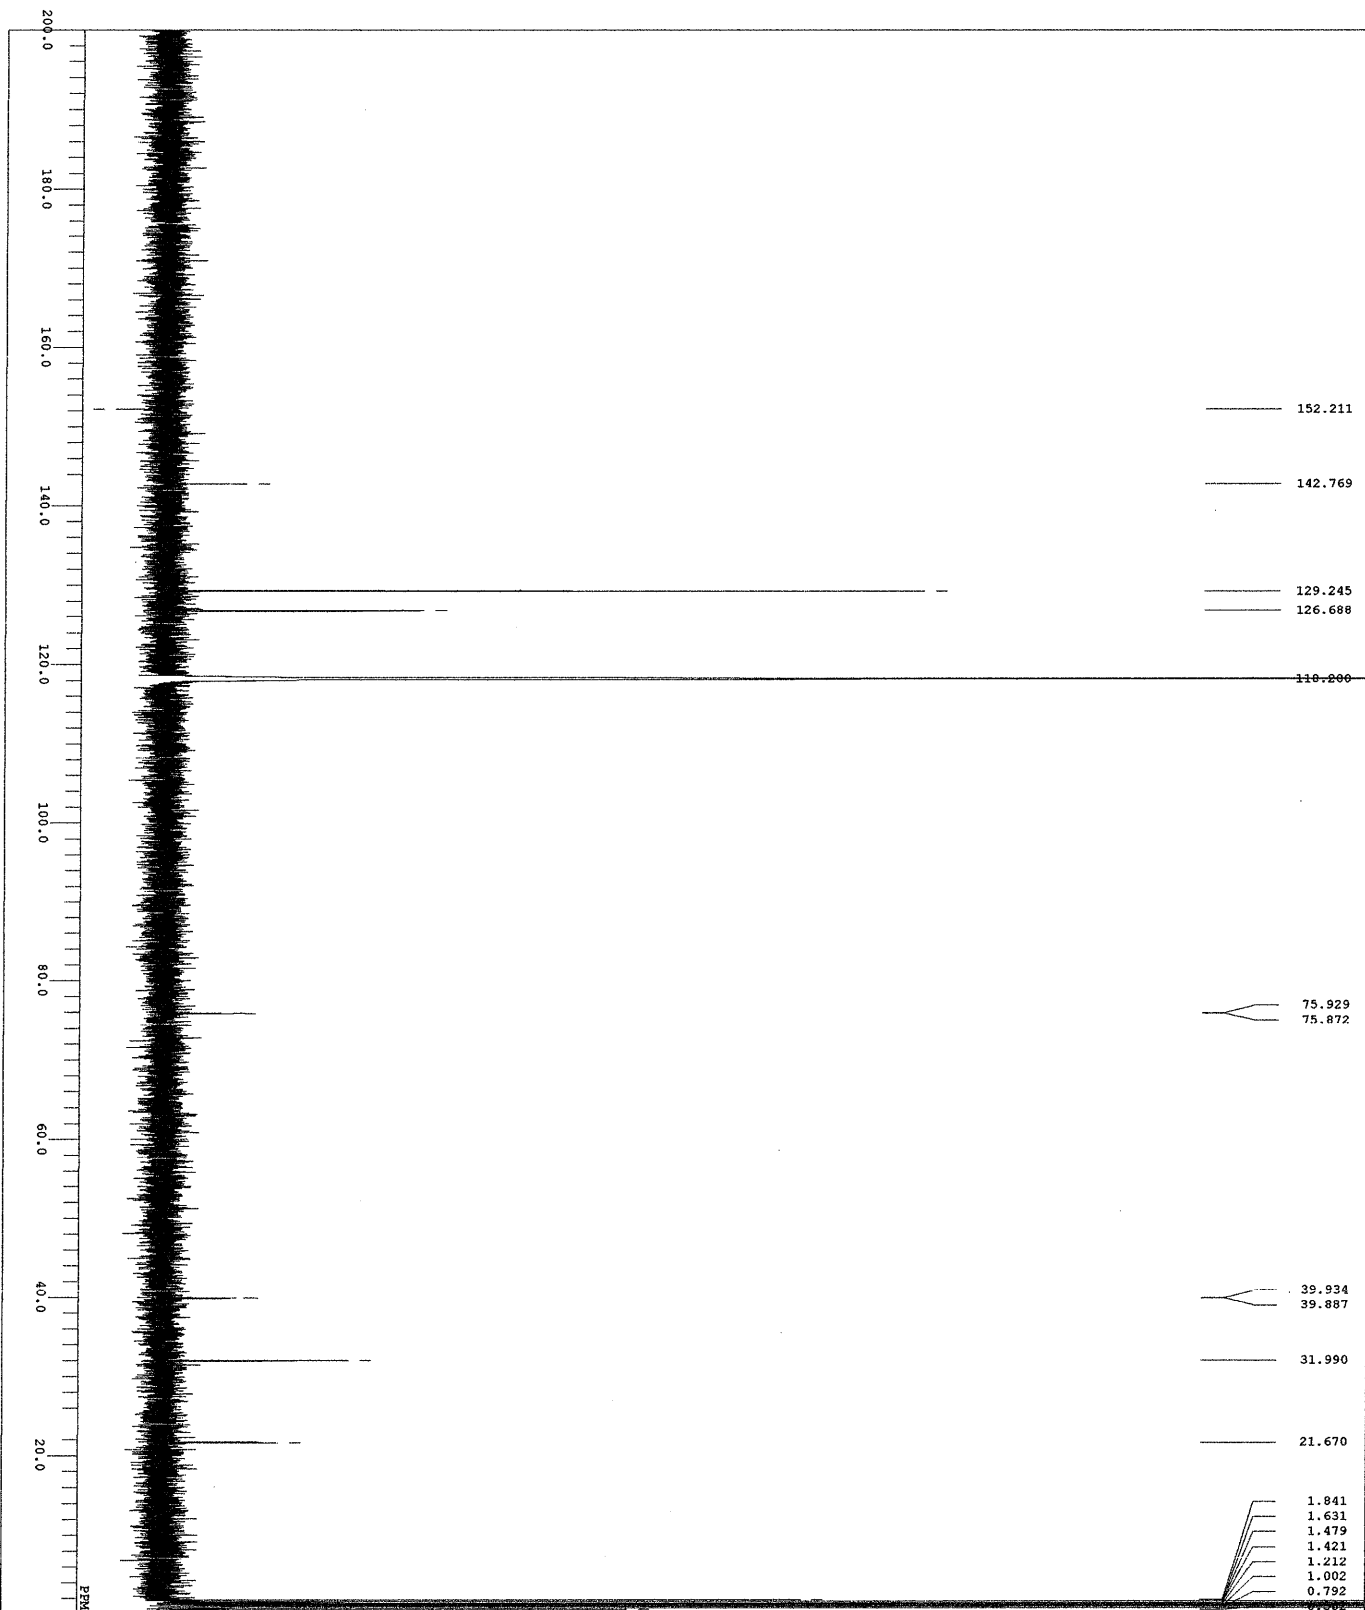

P118 18kd\_secondary\_MecN\_carbon-1-1.als  
 COMMENT 21-03-2019 00:26:41  
 DATIM 13C  
 EXMOD carbon\_jnp  
 OBSFQ 98.52 MHz  
 OBSSET 4.64 KHz  
 OBSFIN 8.74 Hz  
 POINT 26214  
 FREQD 24630.54 Hz  
 SCANS 545  
 PD 1.066 sec  
 P1 2.000 sec  
 P2 3.112 usec  
 IRNUC 1H  
 CTREP 19.9 C  
 SLYMT CD3CN  
 EXRSP 118.20 ppm  
 BF 0.12 Hz  
 RGAIN 58

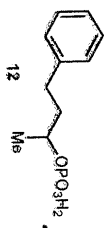

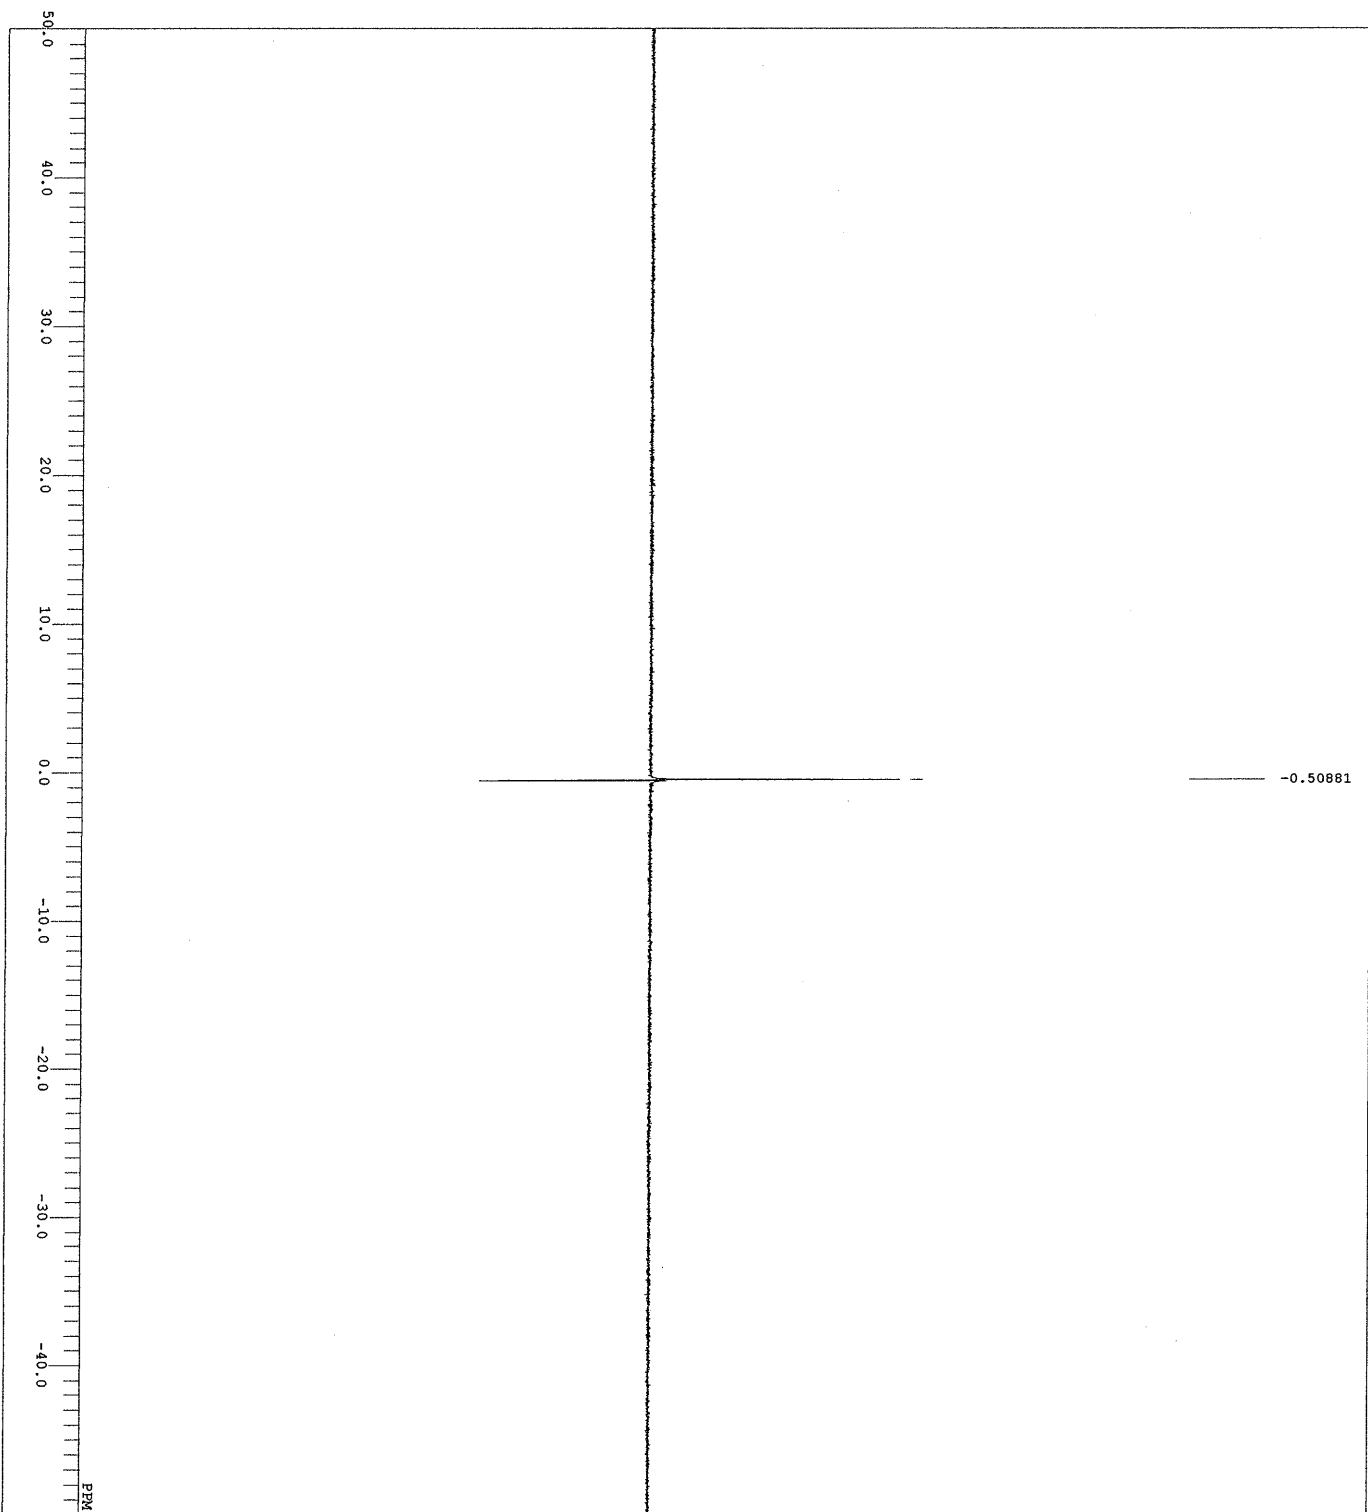

PFILE 18k3074HPLC3\_P-1-1.als  
 COMNT  
 DATIM 01-09-2018 23:03:20  
 OSNUC 31P  
 EXMOD carbon-13p  
 OBSFRQ 158.59 MHz  
 OBSSET 7.99 KHz  
 OBFIN 9.23 Hz  
 POINT 26214  
 FREQU 64102.56 Hz  
 SCANS 5  
 ACQTM 0.4089 sec  
 PD 2.0000 sec  
 PUL 4.80 usec  
 IRNUC 1H 20.1 C  
 CTEMP CD3OD 0.00 ppm  
 SLYMT EXREF 0.12 Hz  
 BE 36  
 RGAIN

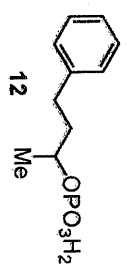



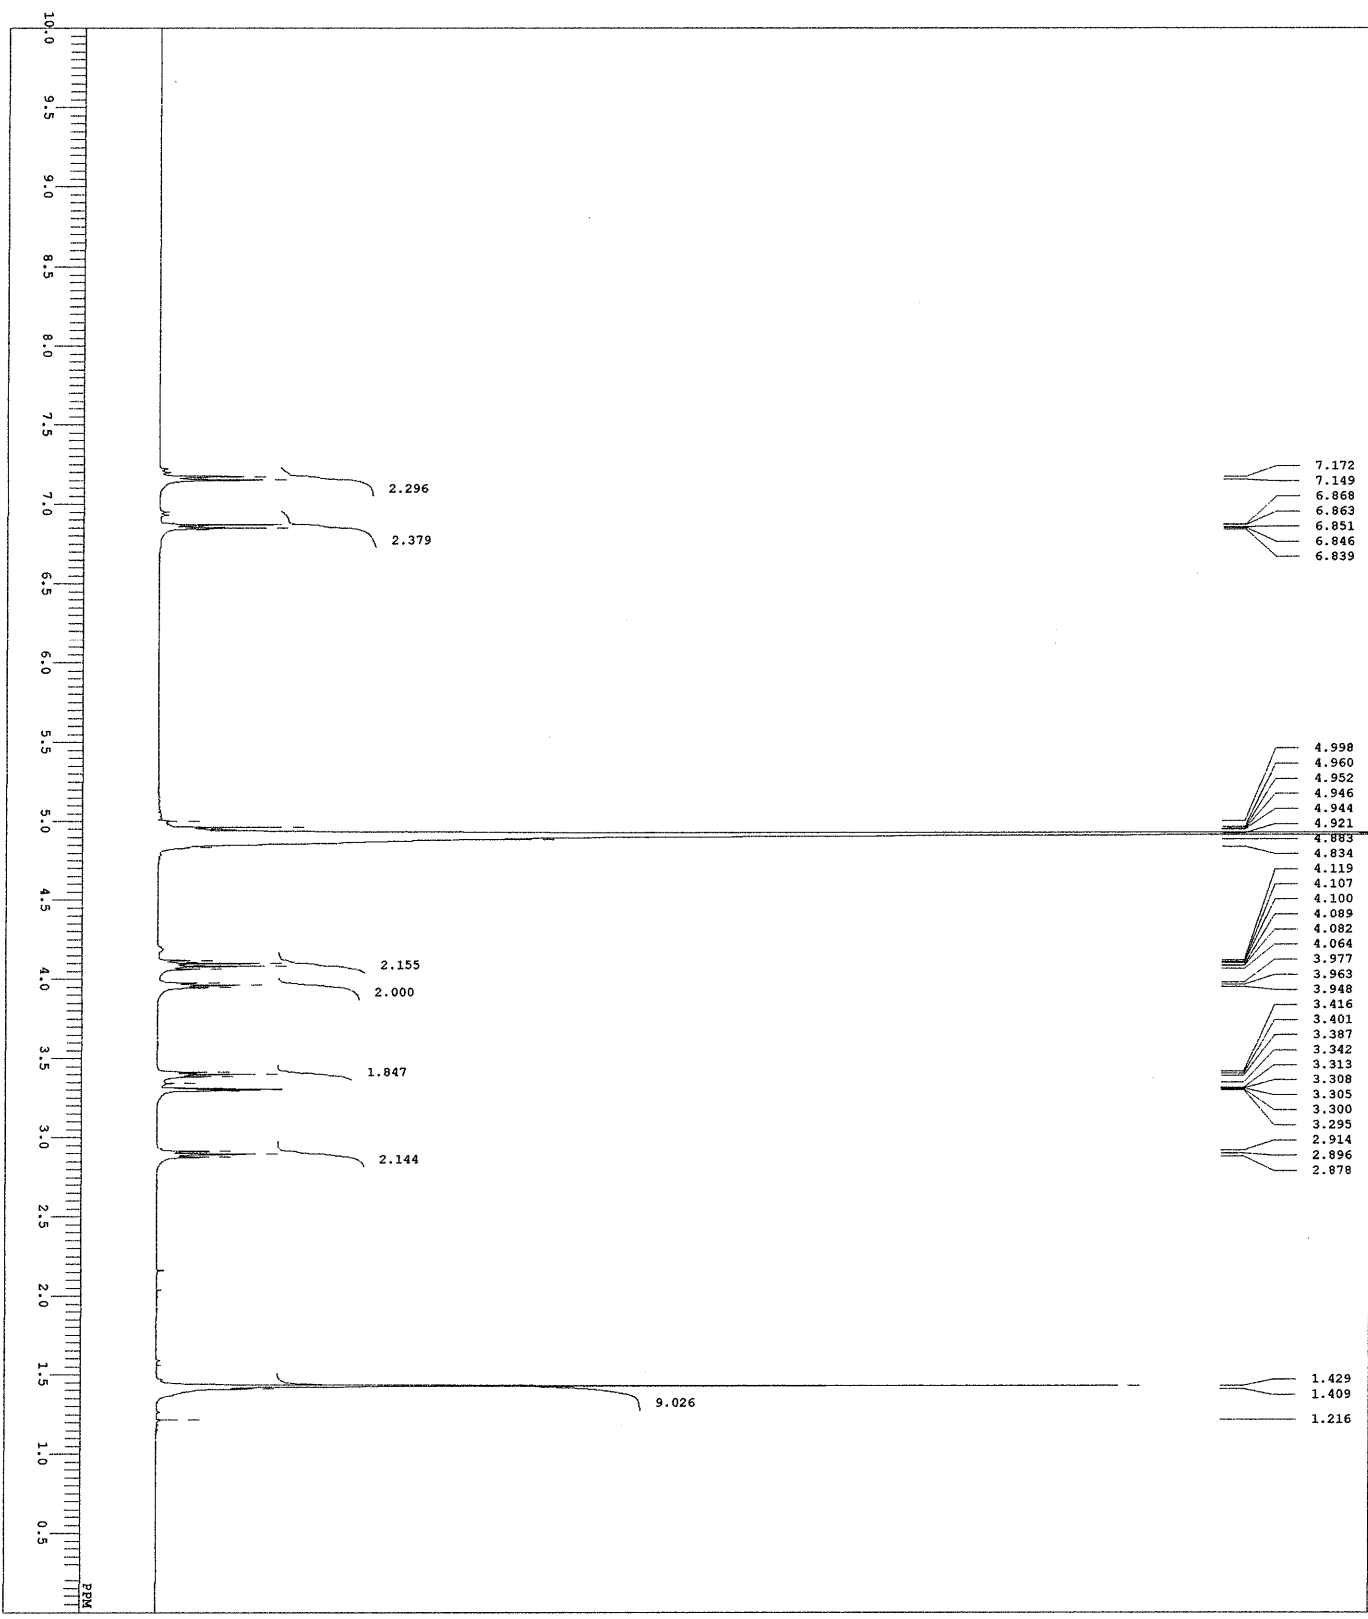

NAME 18kd\_Boc\_tm-1-1.a1.s  
 COUNT 21-03-2019 09:59:43  
 DATE 21-03-2019 09:59:43  
 INSTR 1H  
 PROC 1H  
 EXMETH proton, jnp  
 OBSFREQ 391.78 MHz  
 OBSSET 8.51 KHz  
 OBSFTH 3.34 Hz  
 POINT 13107  
 PREOU 5878.90 Hz  
 SCANS 8  
 ACQTM 2.2295 sec  
 PD 5.0000 sec  
 PUL 5.22 usec  
 INVD 1H  
 CTXPR 19.6 c  
 SLEVT CD30D 3.30 ppm  
 EXRES 0.12 Hz  
 BF 24  
 RGAIN

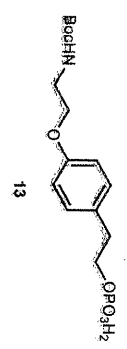

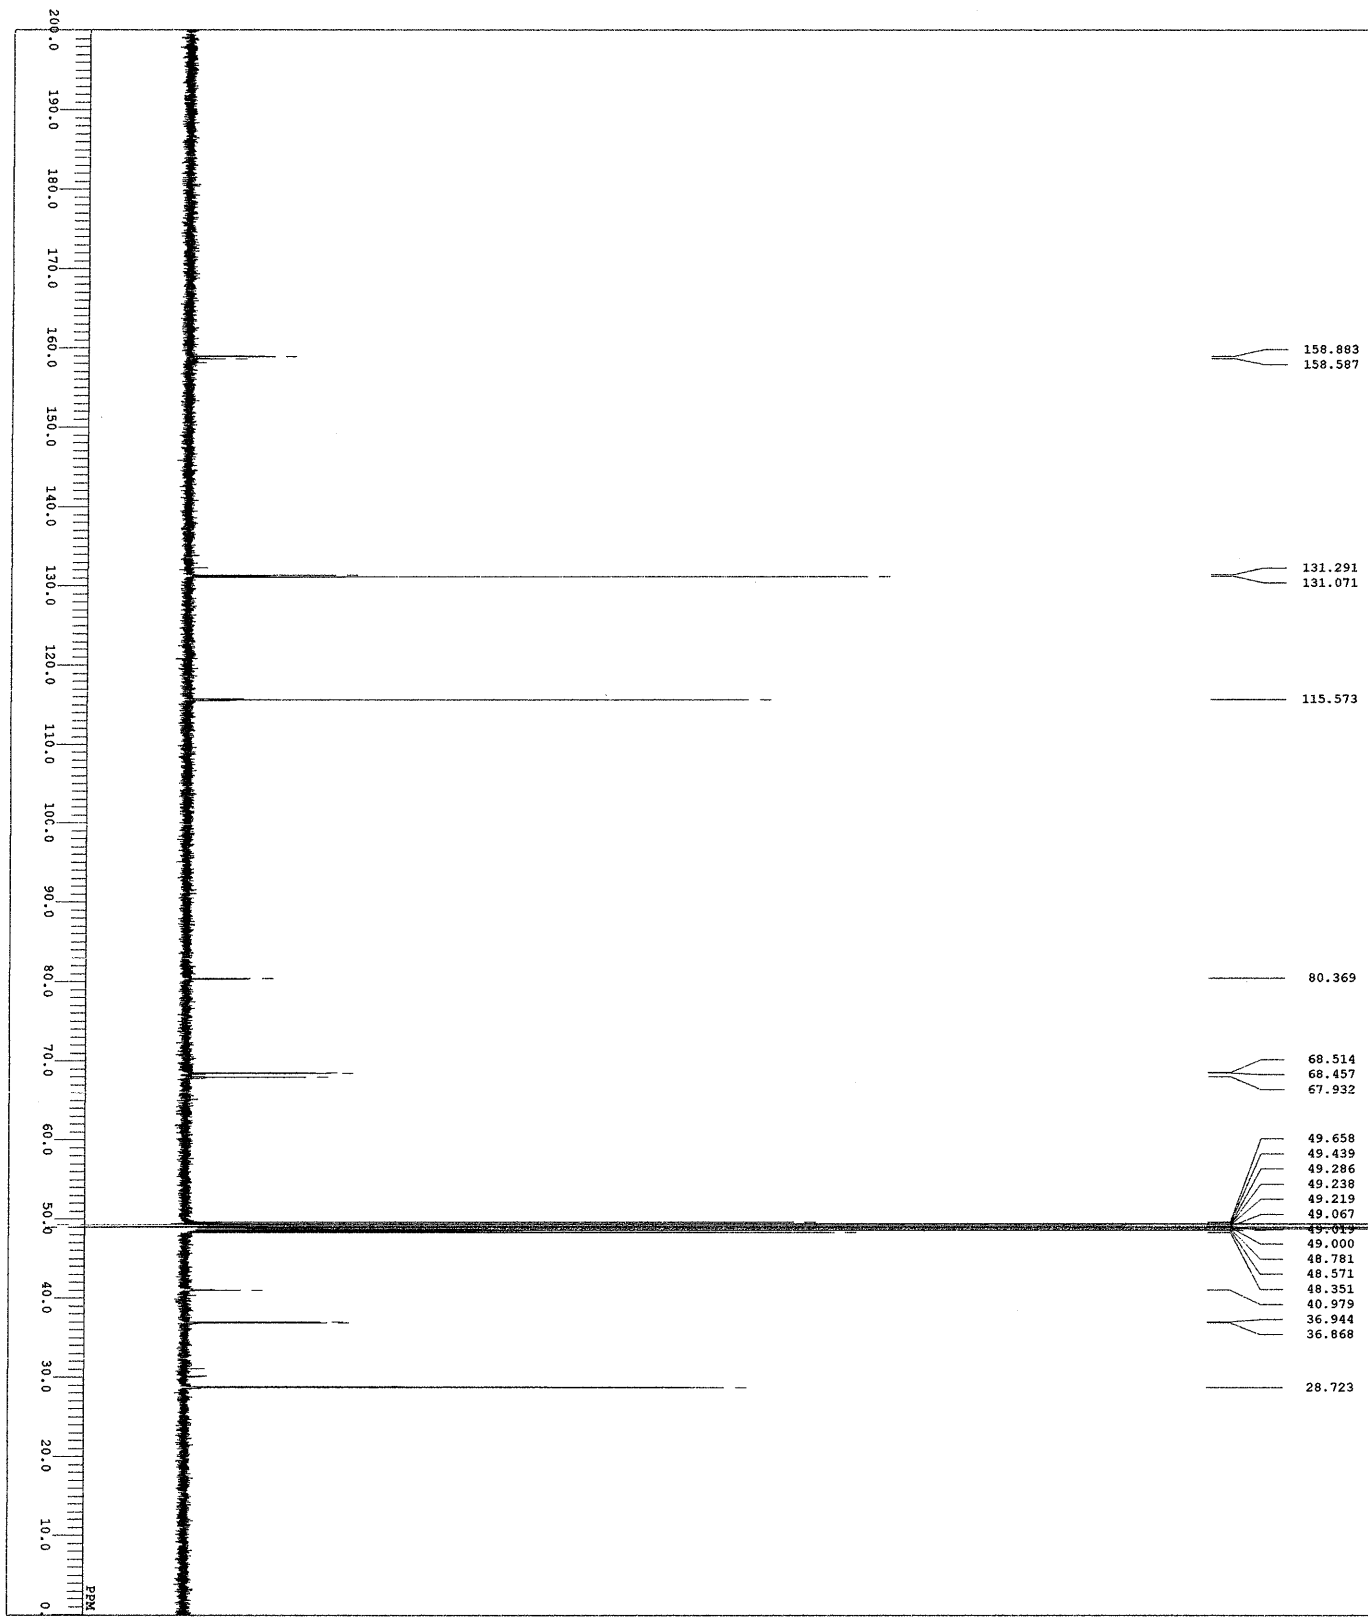

DP18 18kd\_Boc\_tm\_carbon-1-1.a1s  
 COUNT 13C  
 DATE 21-03-2013 01:12:15  
 EXNO 13C  
 EXNO2 carbon\_1xp  
 OBSFQ 98.52 MHz  
 OBSRT 4.64 KHz  
 OBSFN 8.74 Hz  
 POINT 26214  
 FREQ 24630.54 Hz  
 SCANS 10000  
 ACQT 1.0643 sec  
 PD 2.0000 sec  
 PW 3.12 usec  
 IRRNG 1H  
 CTRMR 19.9 C  
 SLVRF 49.00 ppm  
 SFRSE 0.12 Hz  
 RELIN 60

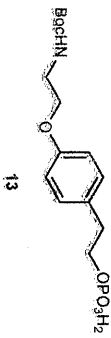

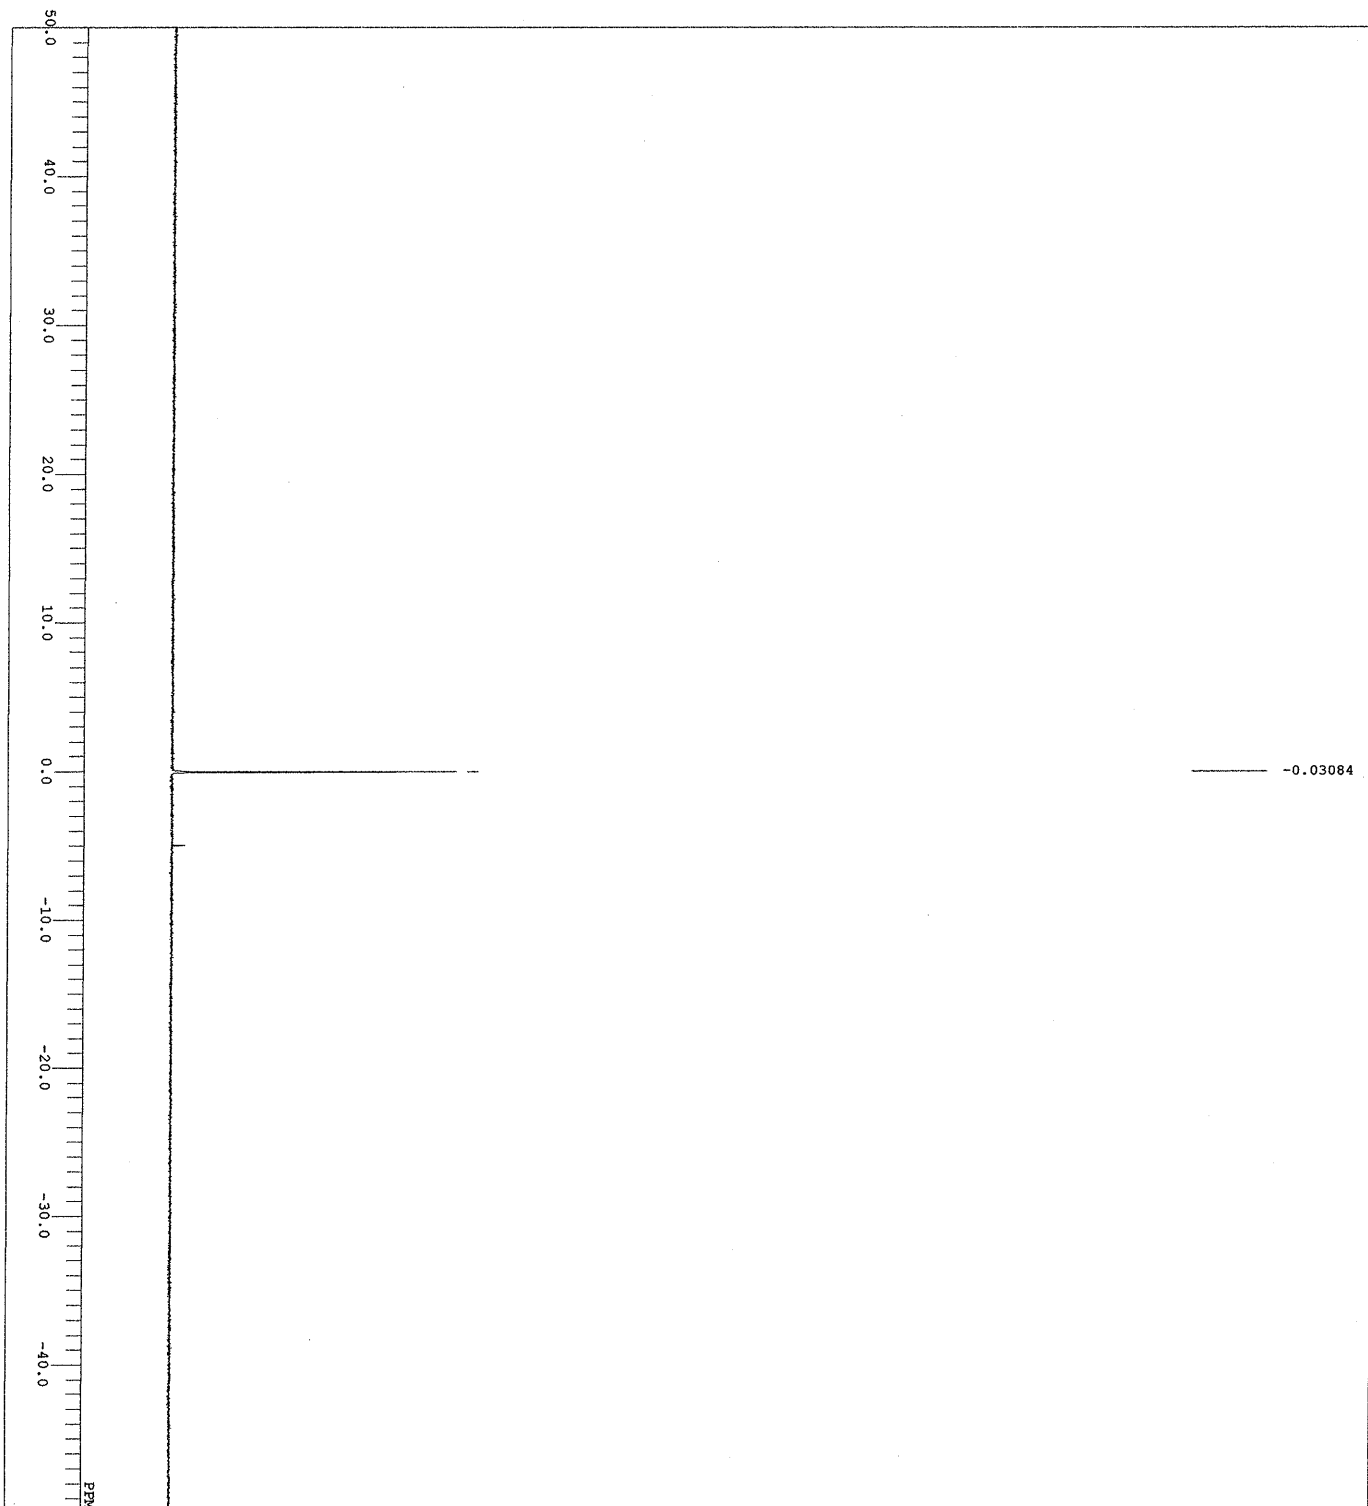

DFTI1 18kd\_Boc\_tm\_MeOH\_P-1-1.als  
 COMPT 21-03-2019 10:04:21  
 DATEM 21-03-2019 10:04:21  
 OBNOC 31P  
 EXMOC carbon.jxp  
 OBFRO 158.59 MHz  
 OBFET 7.99 KHz  
 OBFIN 9.23 Hz  
 POINT 26214  
 FREQV 64102.56 Hz  
 SCANS 22  
 ACQTM 0.4089 sec  
 PD 2.0000 sec  
 PWT 4.80 usec  
 IRTM1 1H  
 CTEMP 19.8 C  
 SLYMT CD30D  
 EXREF 0.00 ppm  
 BR 0.12 Hz  
 RGA1N 36

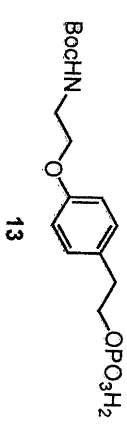

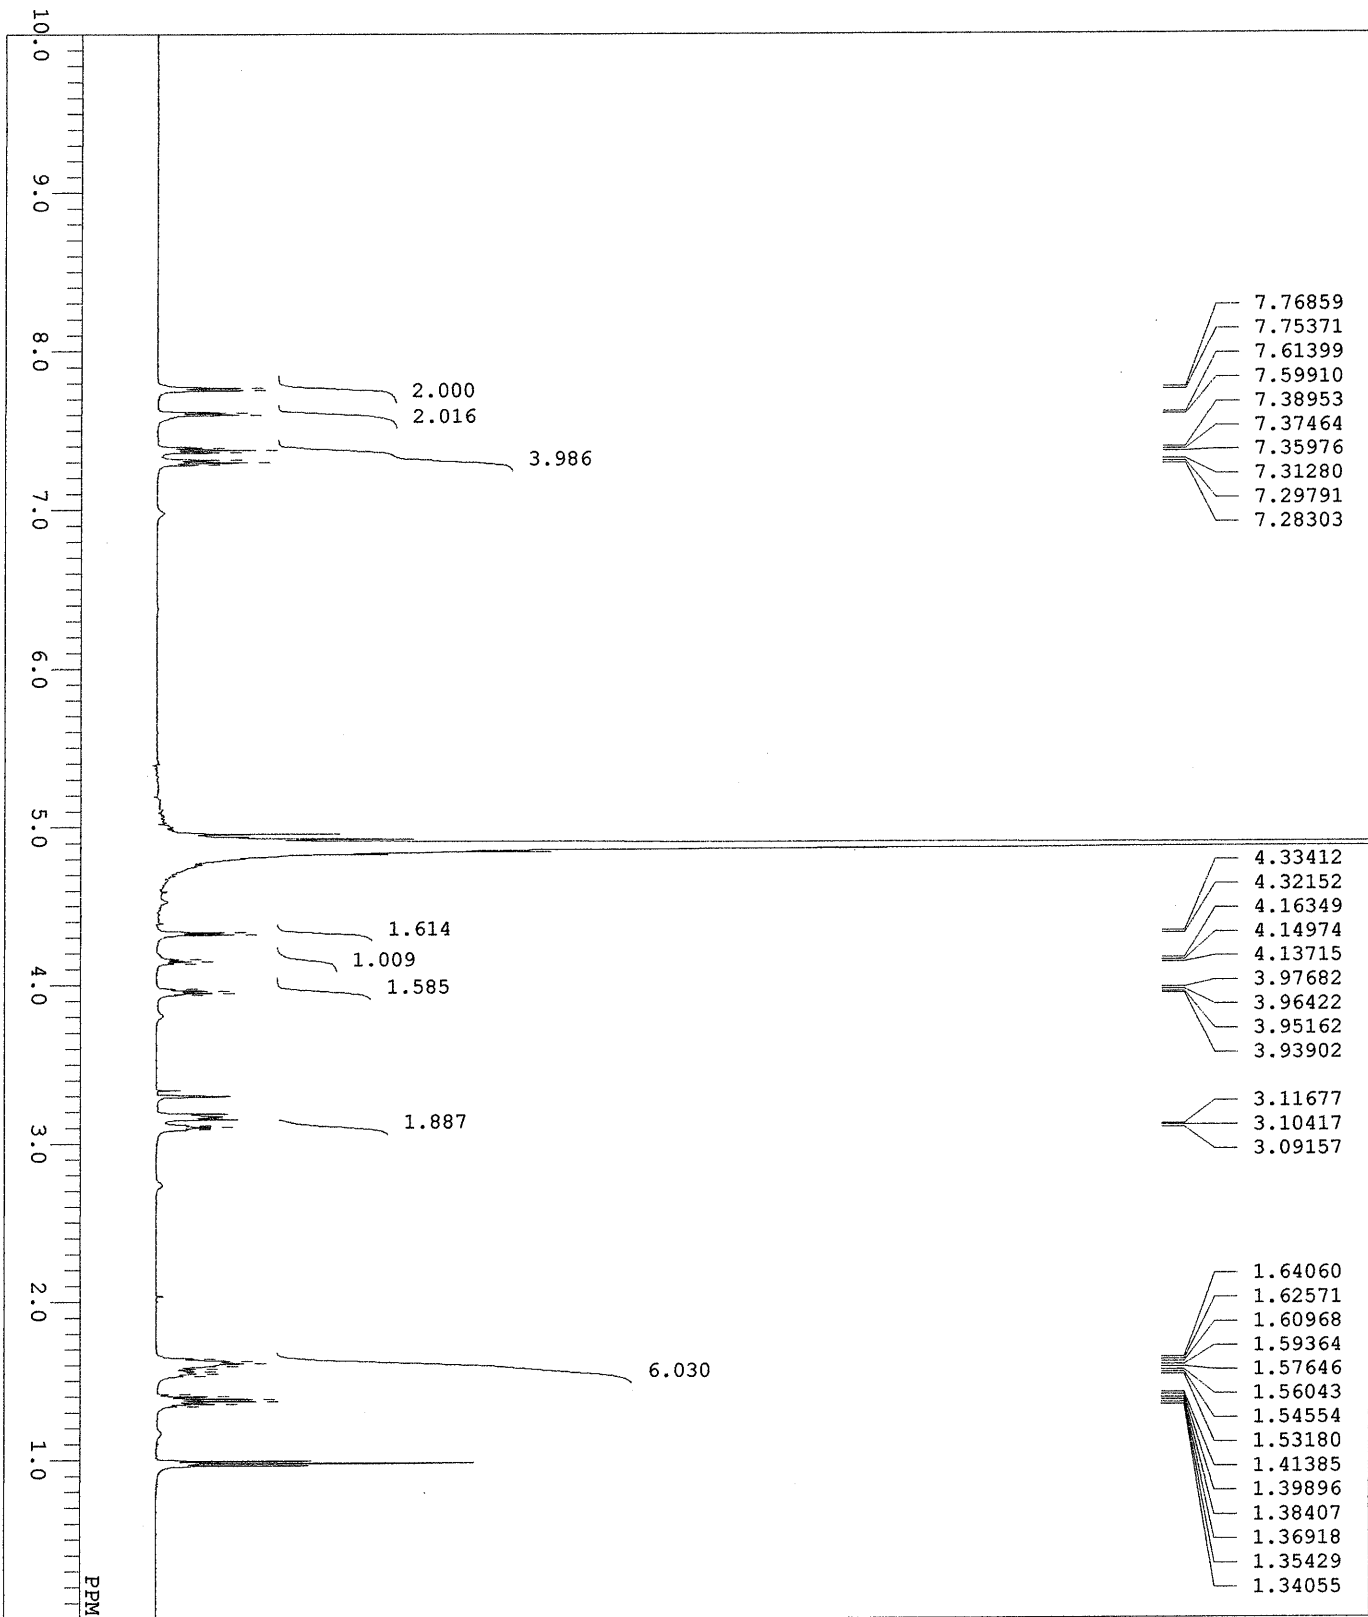

D:\FILE 18k43086HPLC8-1-1.als  
 COMMENT 2018-09-01 04:53:19  
 DATIM 1H  
 OBNDC proton.jxp  
 EXMOD 500.16 MHz  
 OBFRO 2.41 KHz  
 OBSSET 6.01 Hz  
 OBFIN 13107  
 POINT 7507.51 Hz  
 FREQU 8  
 SCANS 1.7459 sec  
 ACQTM 5.0000 sec  
 PD 5.55 usec  
 PW1 1H  
 IRNUC 21.7 C  
 CTEMP CD3OD  
 SLVNT 3.30 ppm  
 EXREF 0.12 Hz  
 BF 18  
 RGAIN

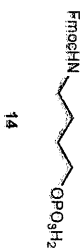

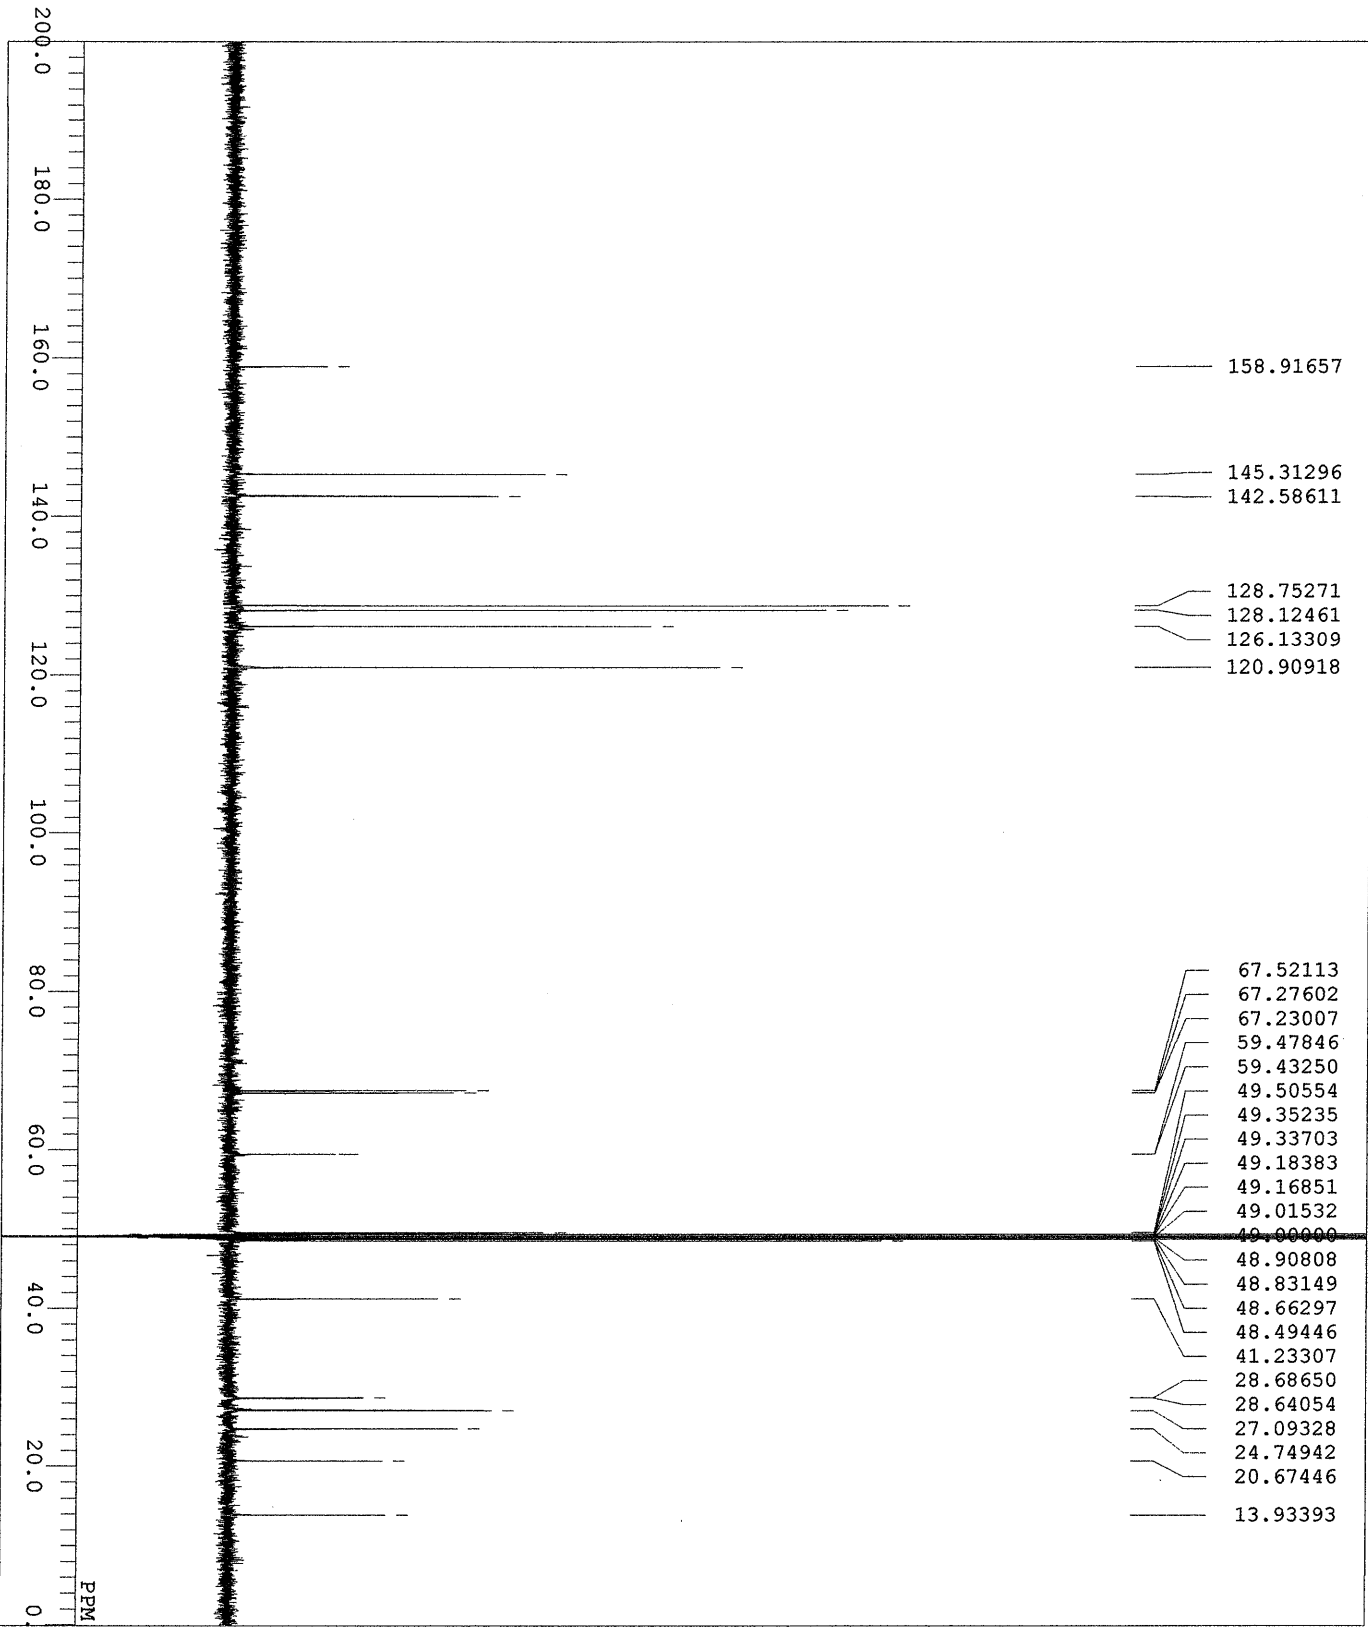

```

DFILE 18kd3117HPLC4_carbon-1-1.als
COMMENT 2018-09-20 04:16:60
DATIM 13C
OBNUC carbon-1-1
EXMOD carbon-1-1
OBFRQ 125.77 MHz
OBSET 1.58 KHz
OBFIN 5.95 Hz
POINT 26214
FREOU 50505.05 Hz
SCANS 1895
ACQTM 0.5190 sec
PD 2.0000 sec
PW1 3.40 usec
IRNUC 1H
CTEMP 22.2 c
SLVNT CD3OD
EXREF 49.00 ppm
BF 0.12 Hz
RGAIN 60
    
```

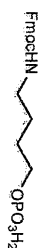

14

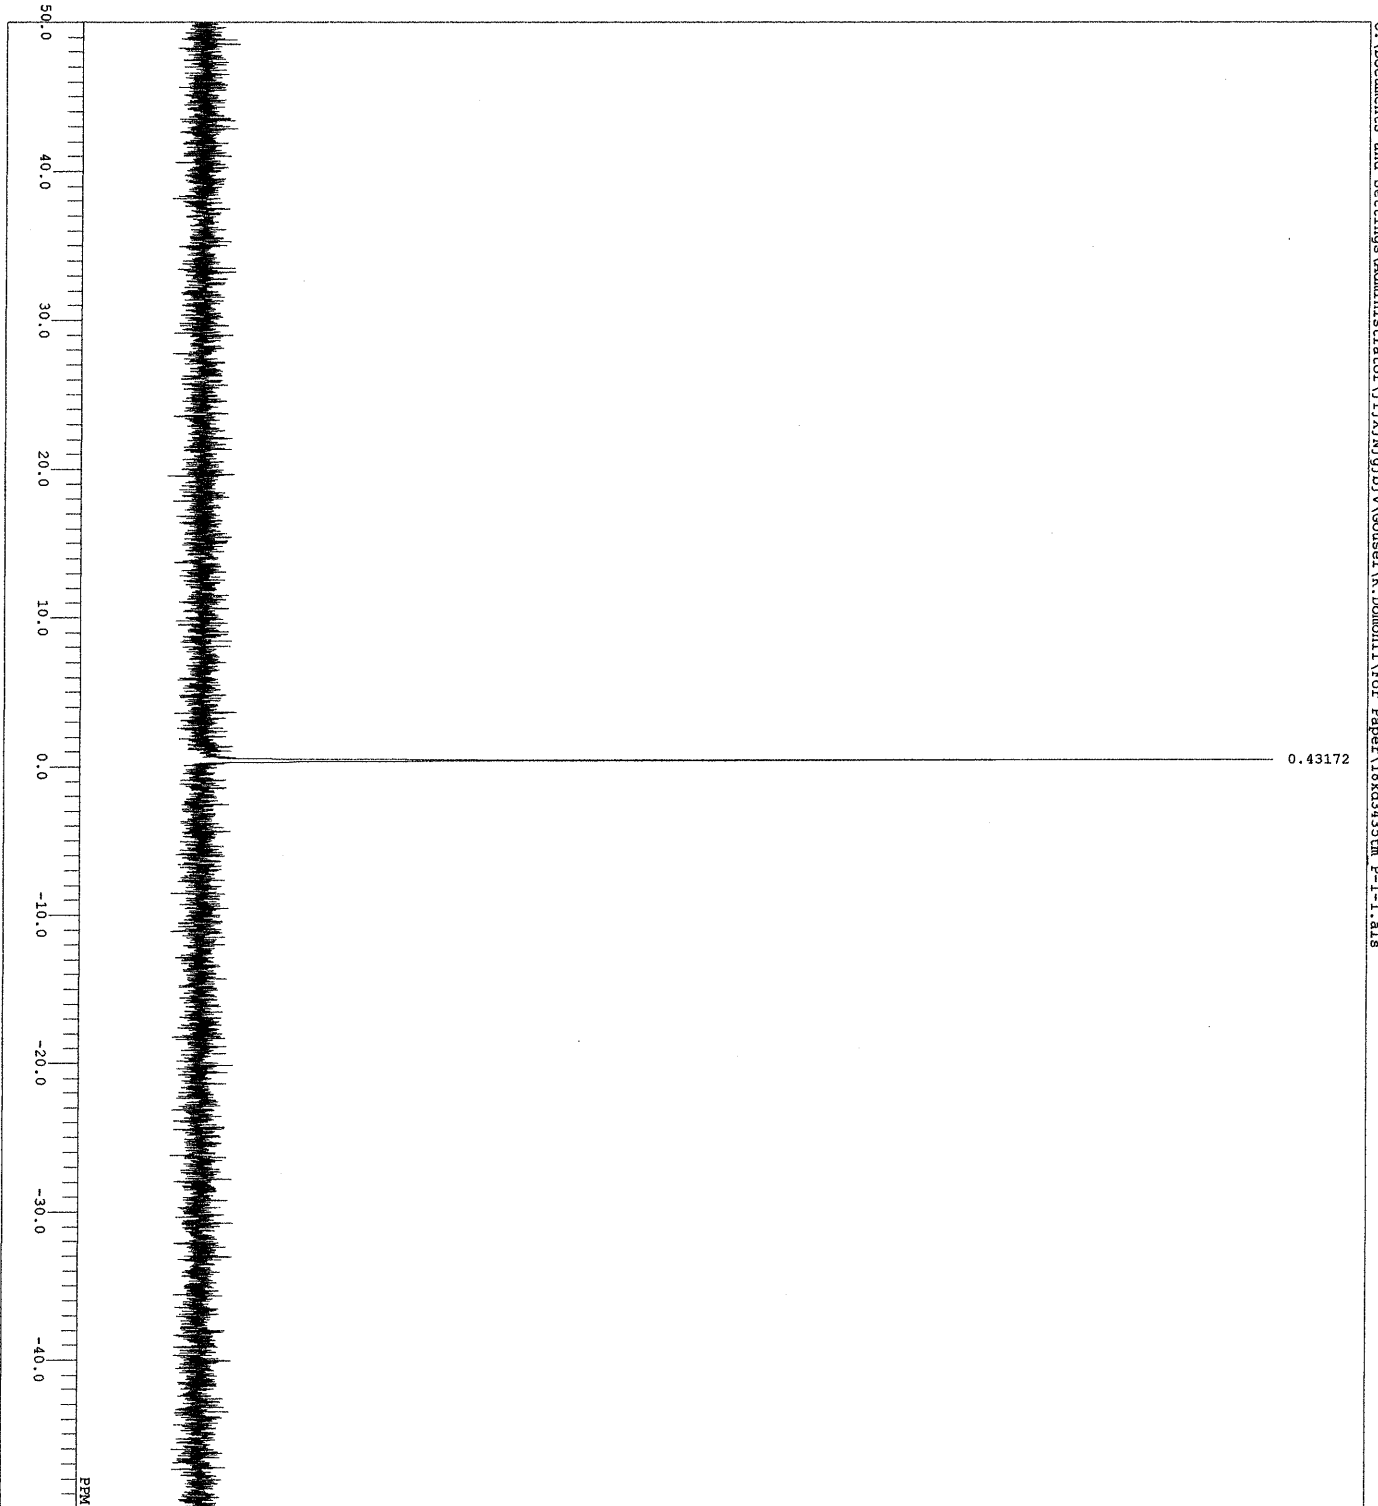

FILE 18kd3435tm\_P-1-1.als  
 COMMENT  
 DATE 07-03-2019 05:16:05  
 ORBIT 31P  
 EXMOD carbon-13p  
 ORPRO 158.59 MHz  
 OBSFT 7.99 KHZ  
 OBSFN 0.23 Hz  
 POINT 28214  
 FREQ0 64102.56 Hz  
 SCANS 8  
 ACQTM 0.4089 sec  
 PD 2.0000 sec  
 PVI 4.80 usec  
 IRMTC 1H  
 CTEMP 19.9 c  
 SIVMT CD30D  
 EXREF 0.00 ppm  
 BF 0.12 Hz  
 RGAIN 56

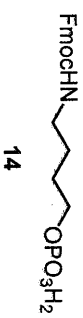

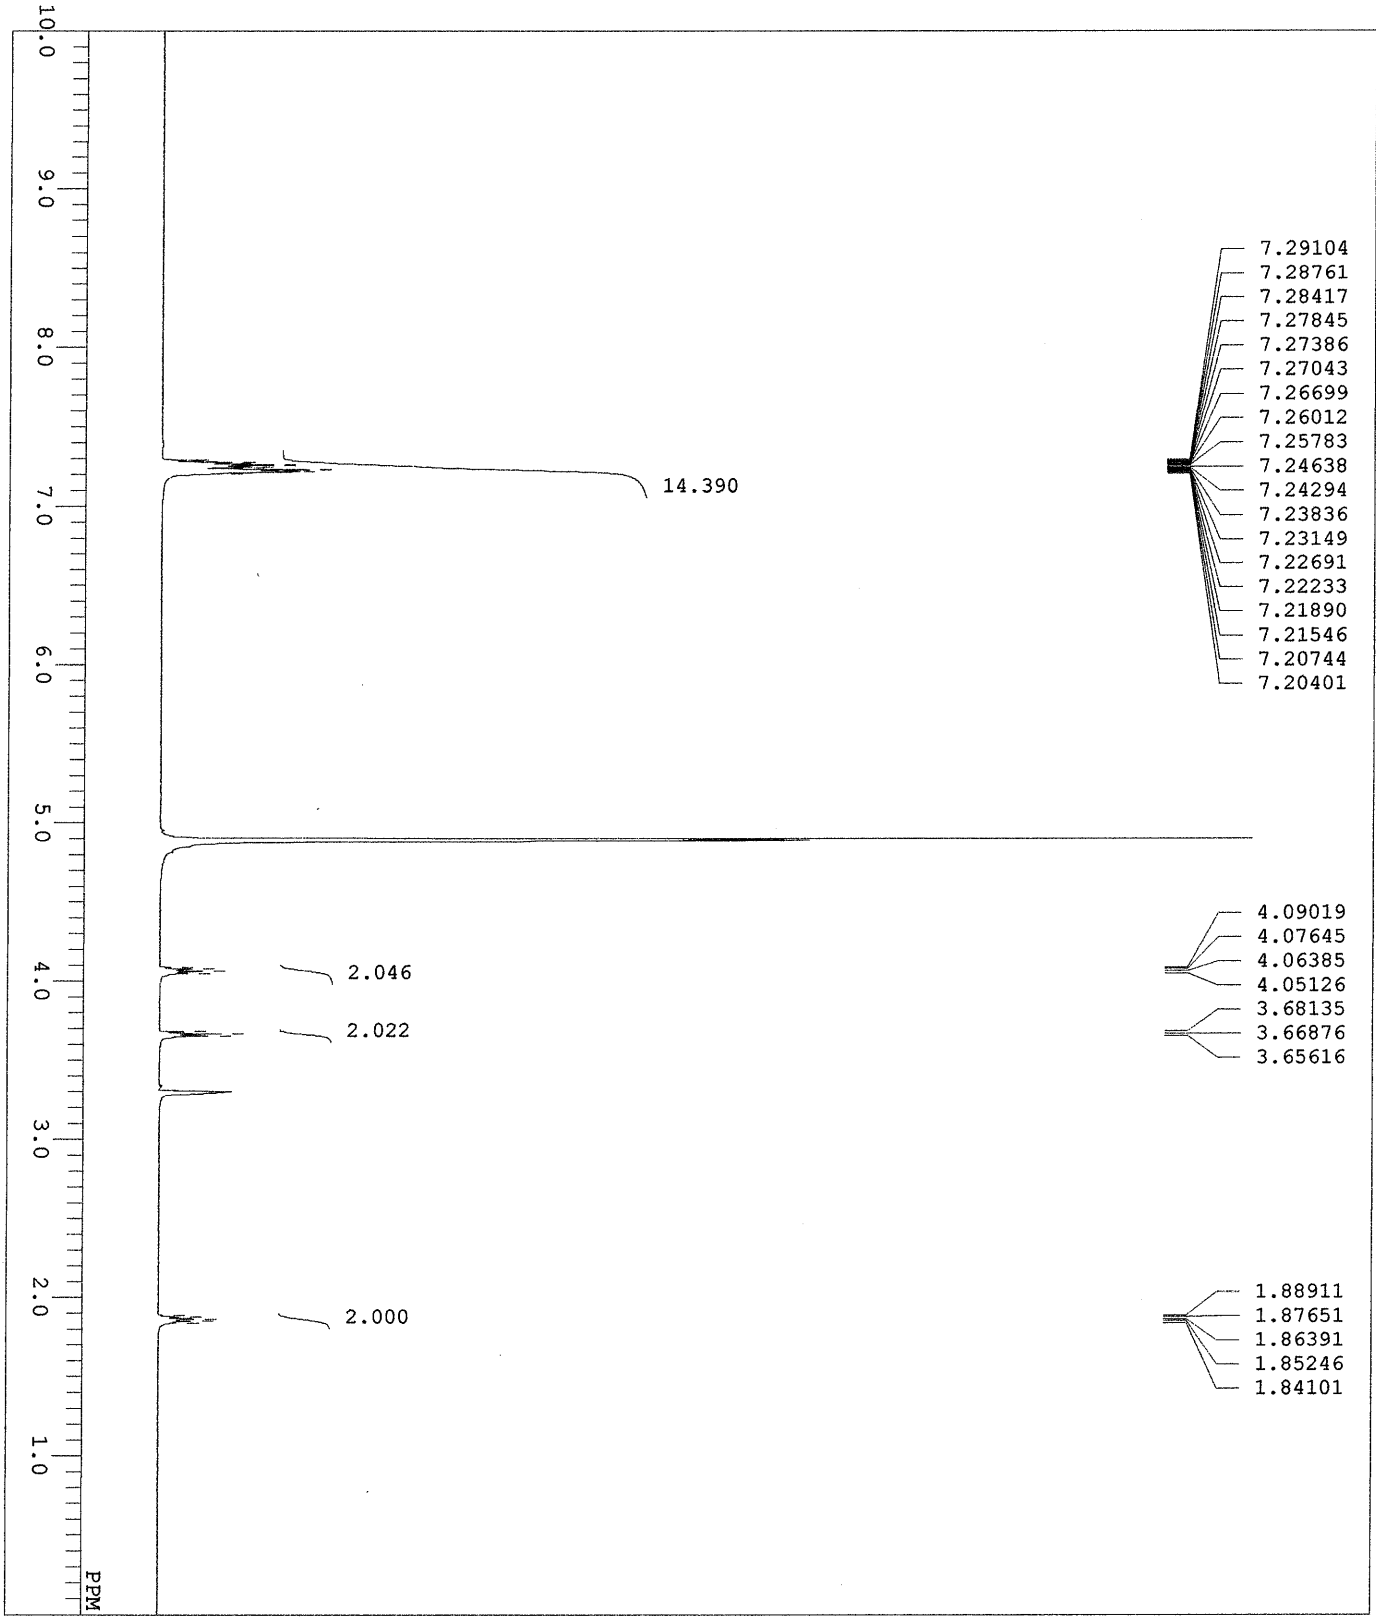

FILE 18kd3082HPLC3-1-1.als  
 COMNT 2018-09-01 04:24:23  
 DATIM 1H  
 OBNUC proton.jxp  
 EXMOD 500.16 MHz  
 OBFRO 2.41 KHz  
 OBSSET 6.01 Hz  
 OBFIN 13107  
 POINT 7507.51 Hz  
 FREOU 4  
 SCANS 1.7459 sec  
 ACQTM 5.0000 sec  
 PD 5.55 usec  
 PW1 1H  
 IRNUC 21.5 C  
 CTEMP CD3OD  
 SLVNT 3.30 ppm  
 EXREF 0.12 Hz  
 BF 30  
 RGAIN

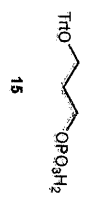

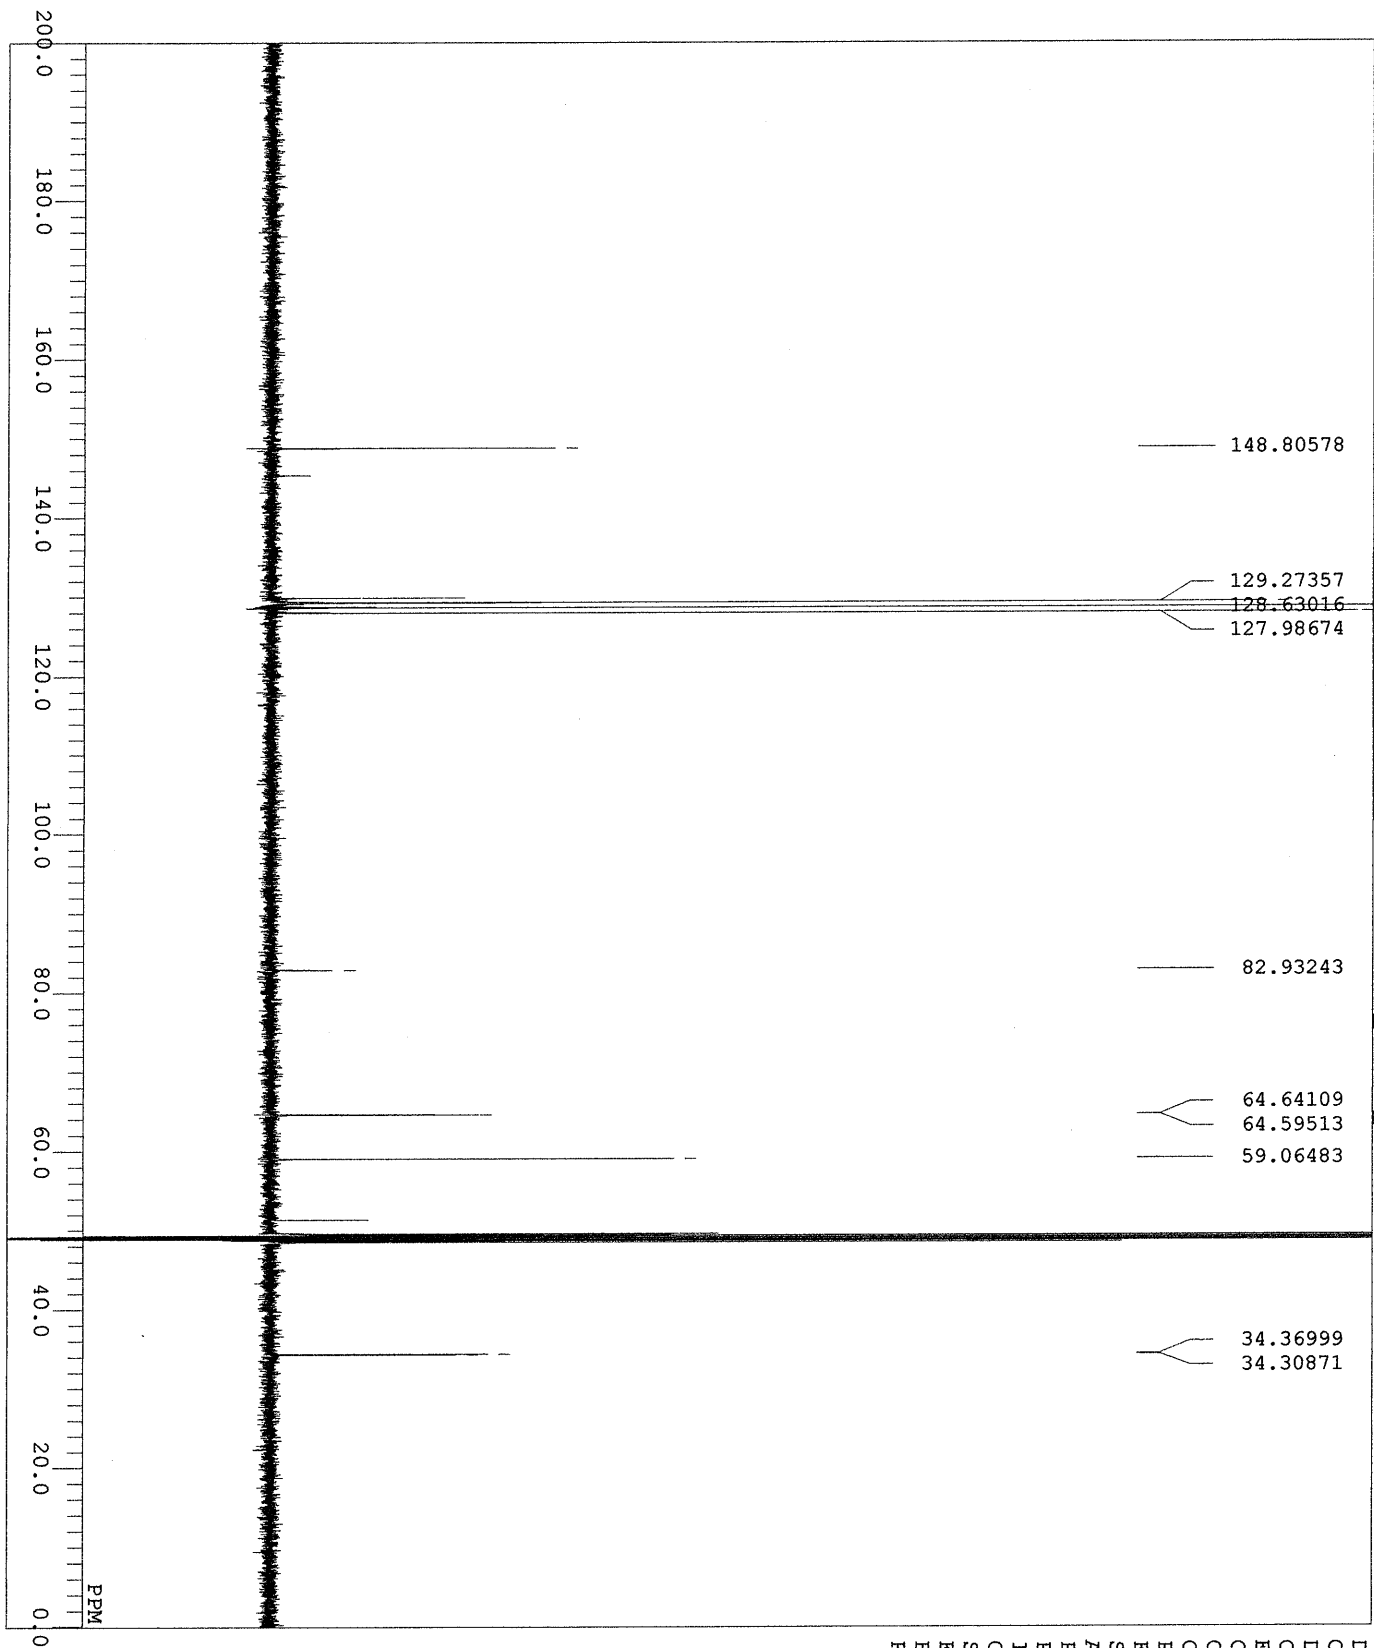

```

DFILE 18kd3082HPLC3_carbon_retry-1-1.
COMNT 2018-09-01 05:34:16
DATIM 13C
OBNUC carbon.fxp
EXMOD 125.77 MHz
OBFRO 1.58 KHz
OBSET 5.95 Hz
OBFIN 26214
POINT 50505.05 Hz
PREOU 6623
SCANS 0.5190 sec
ACQTM 2.0000 sec
PD 3.40 usec
PW1 1H
IRNUC 22.3 C
CTEMP CD3OD
SLVNT 49.00 ppm
EXREF BF
BF 0.12 Hz
RGAIN 60
    
```

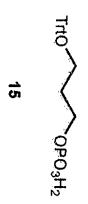



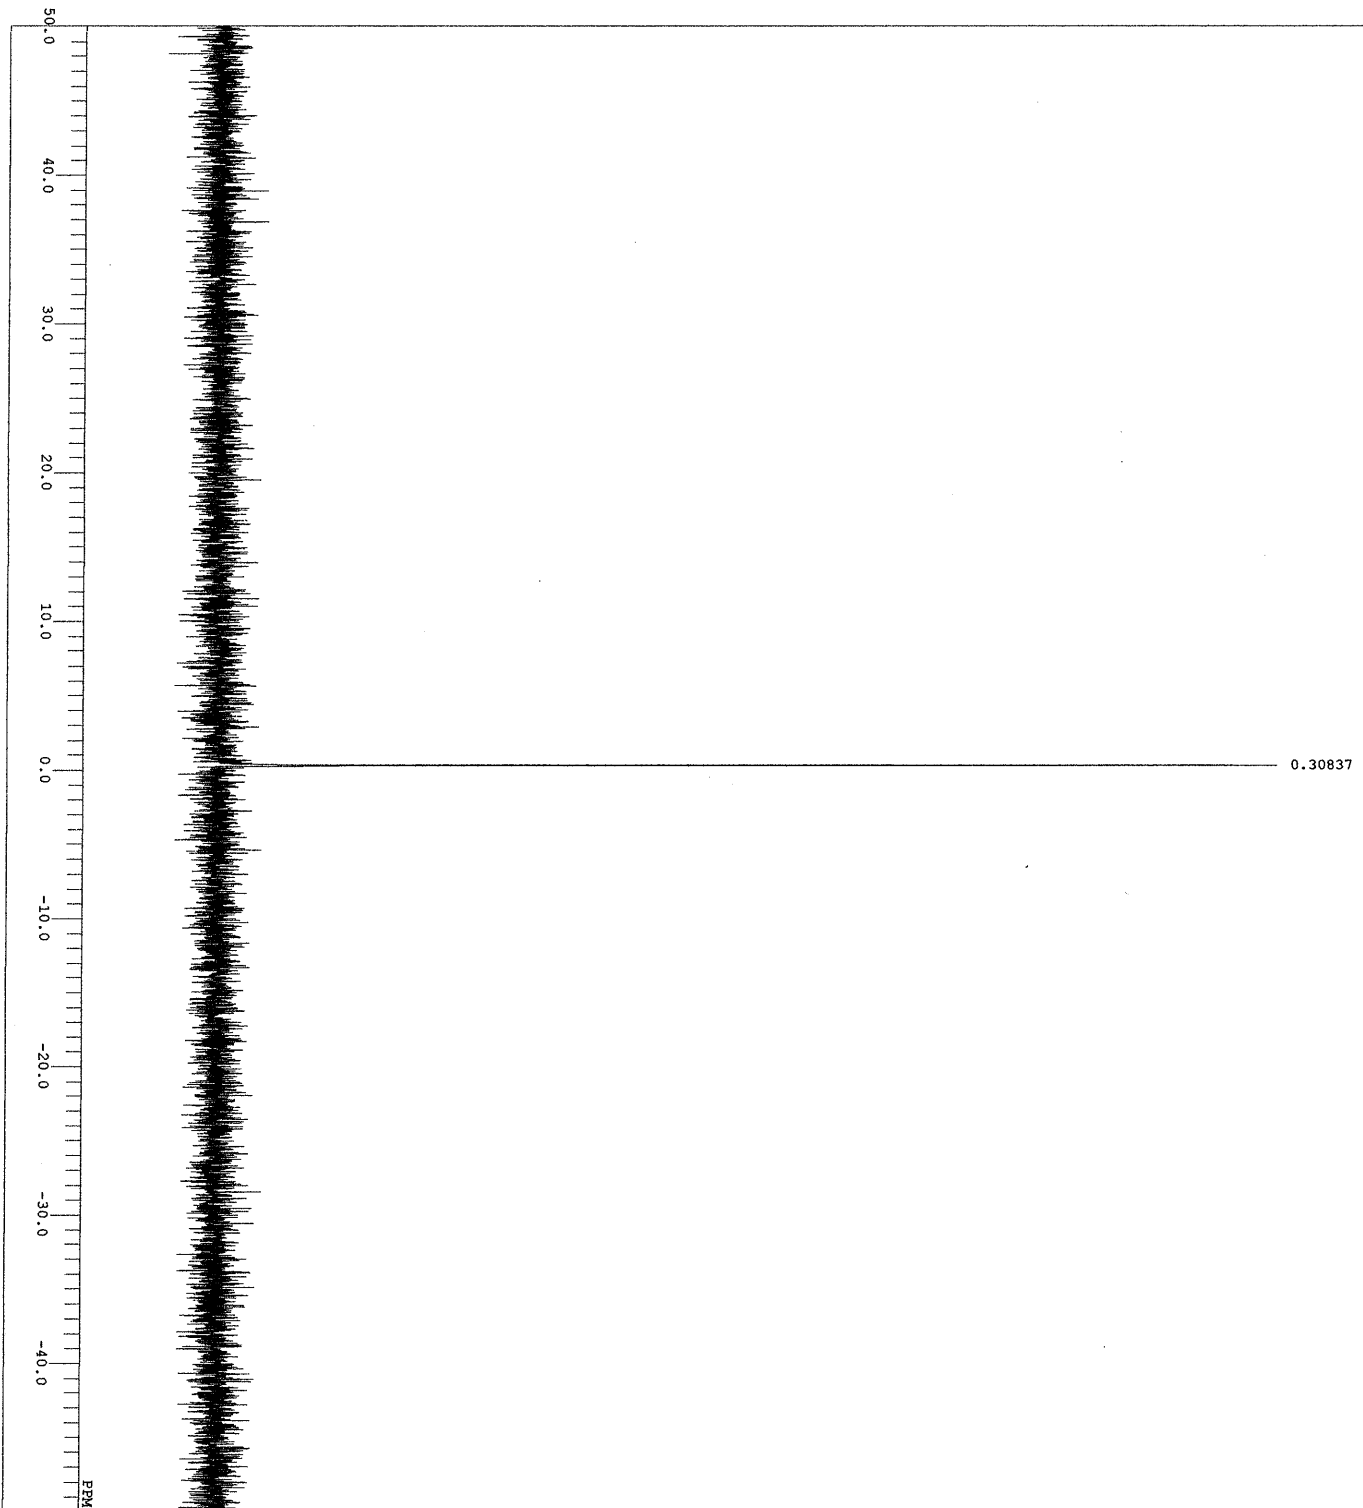

```

DETE 18k3082HPLC3_P-1-1.als
COMPT 01-09-2018 06:02:21
NAME 31P
EXPNO 138.59 MHz
PROCNO 7.99 KHz
F2 5.23 Hz
POINT 28214
FREQ 64102.56 Hz
SCANS 8
ACQTM 0.4089 sec
PD 2.0000 sec
PWL 4.80 usec
IRNUC 1H
SOLVENT CD3OD 20.4 c
S1VNT 0.00 ppm
EXREF 0.12 Hz
RGAIN 56
    
```

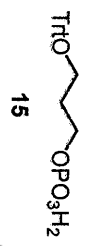

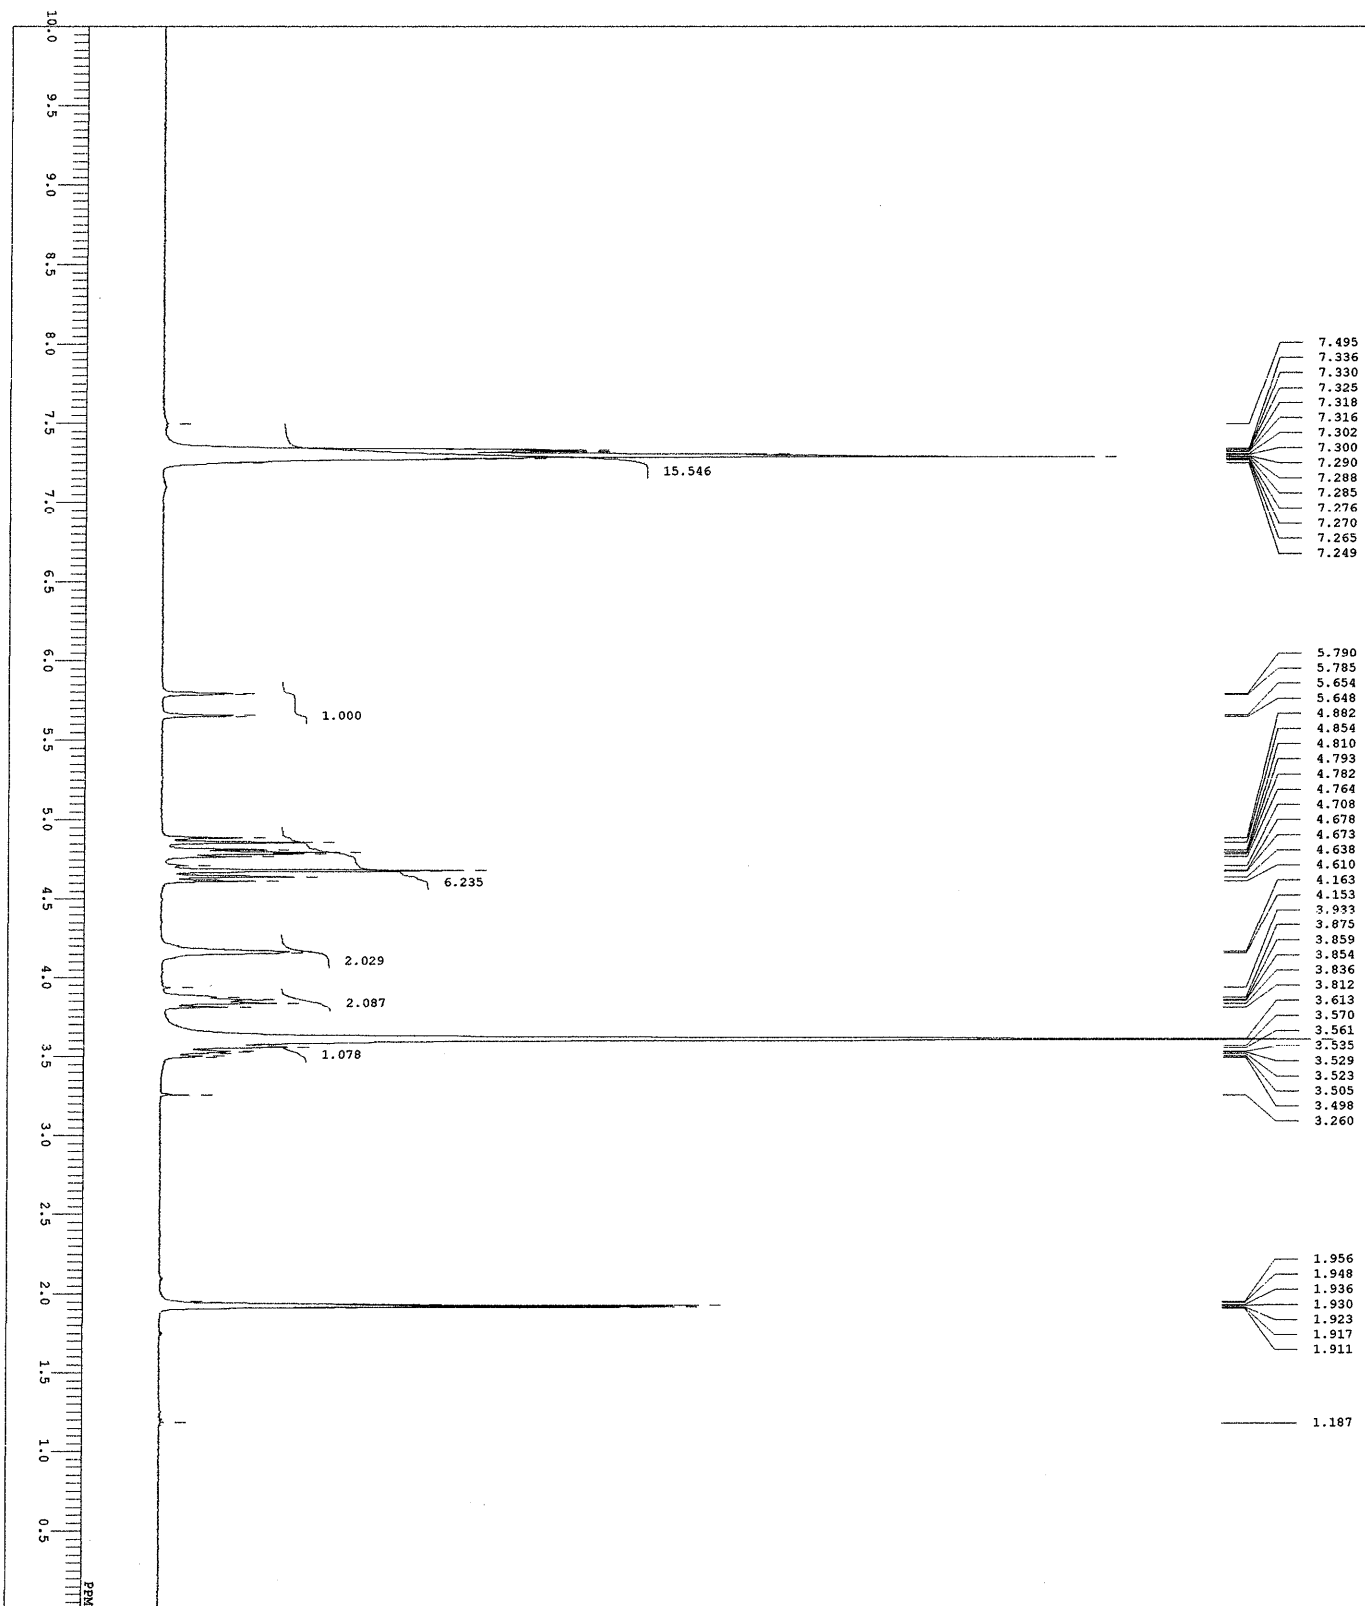

DEPTH 18k3454HPC6-1-1.a1s  
 CONV 13-03-2019 05:24:30  
 DATE 13-03-2019 05:24:30  
 ORIGIN IH  
 EXACT 391.78 MHz  
 OBSER 391.78 MHz  
 OPER 391.78 MHz  
 POINT 13107 Hz  
 FREQ 5882.35 Hz  
 SCANS 8  
 ACQTM 2.2282 sec  
 PD 5.0000 sec  
 PUL 5.22 usec  
 INTC 1H  
 CTEMP 19.6 c  
 SIVNT CD3CN  
 EXRES 1.93 ppm  
 BF 0.12 Hz  
 RGAIN 38

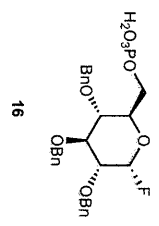

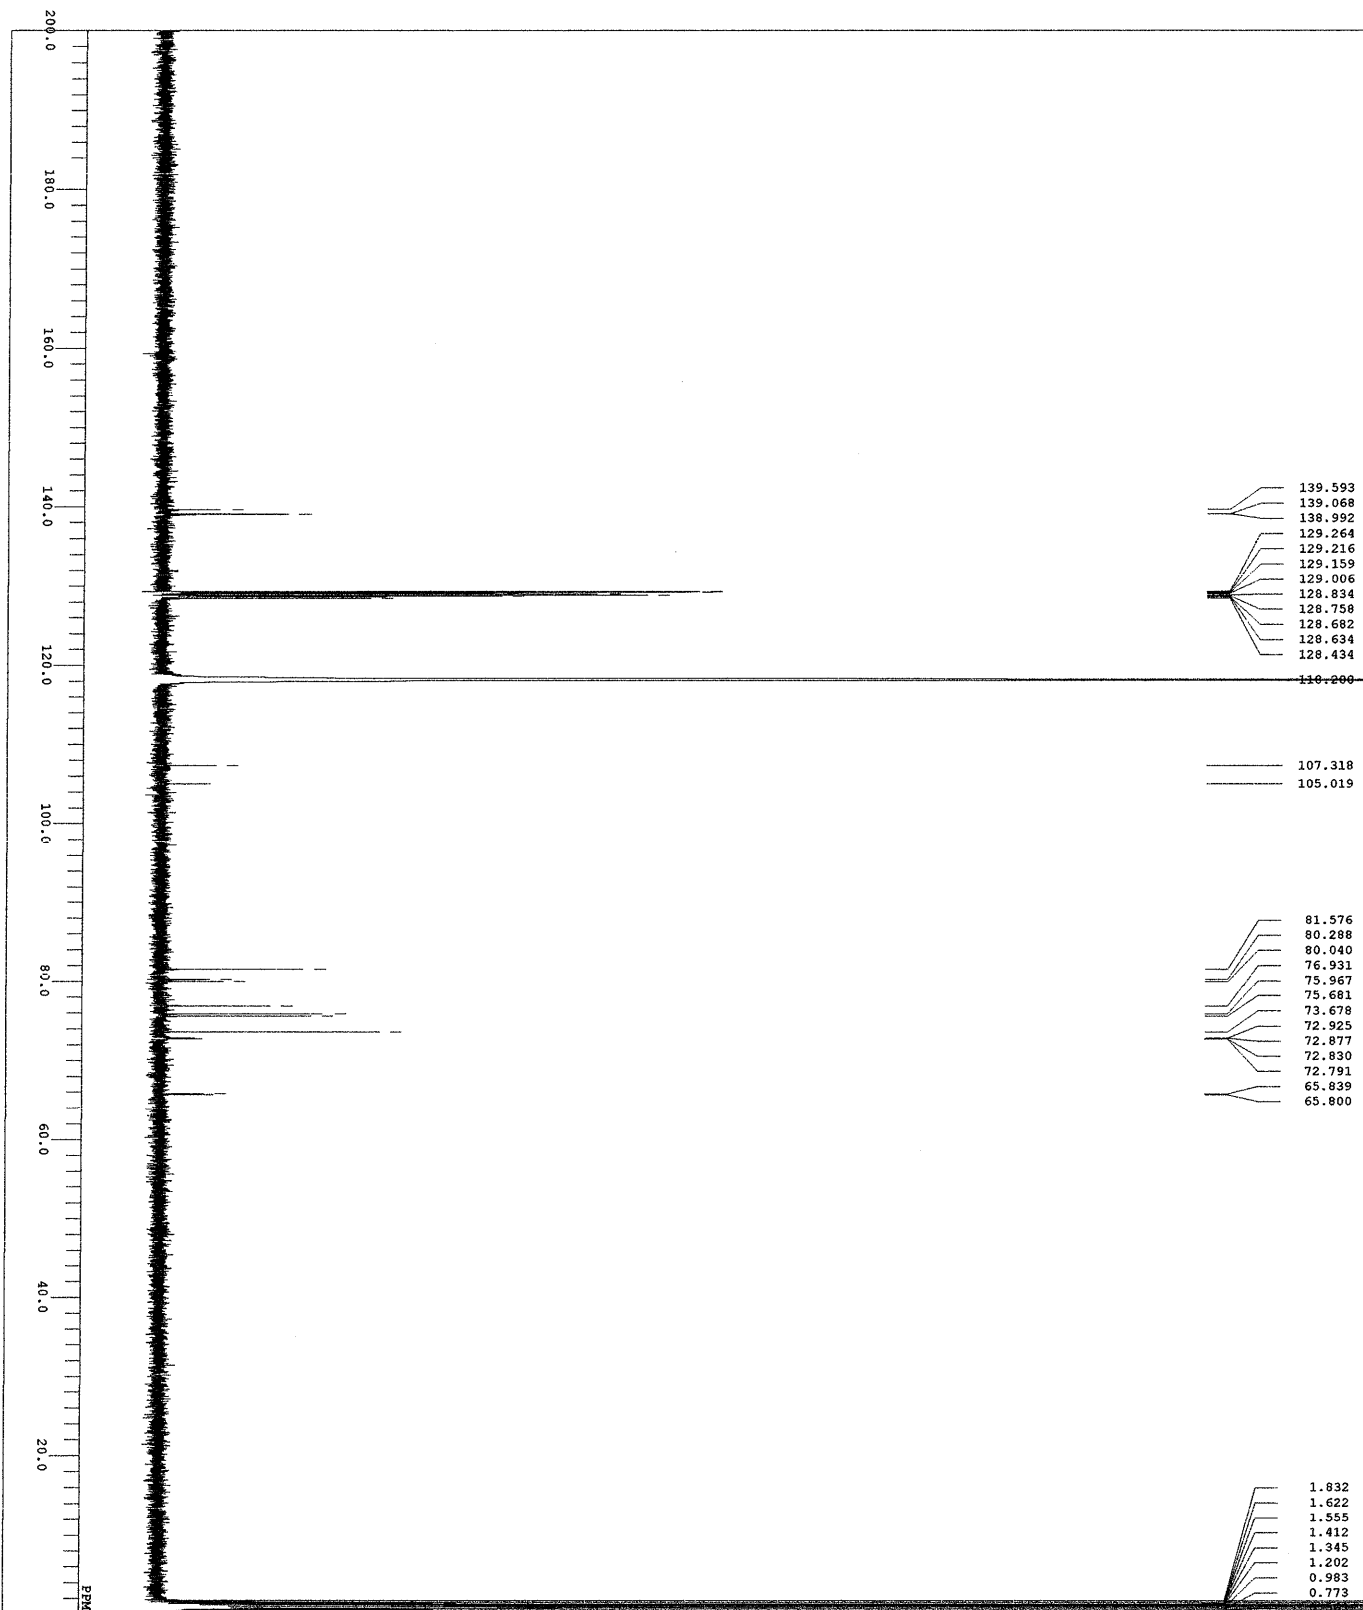

FILE 18k3454HPLC6\_carbon-1-1.d1s  
 COMMENT 14-03-2019 02:29:20  
 DATE 13C  
 EXMOD carbon\_jxp  
 OBFREQ 98.52 MHz  
 OBSSET 4.64 kHz  
 OBFIN 8.74 Hz  
 POINT 262.14  
 FREQ 24630.54 Hz  
 SCANS 9522  
 ACQTM 1.0643 sec  
 PD 2.0000 sec  
 ENI 3.12 usec  
 INRNC 1H  
 GPRF 20.0 c  
 CD3CN 118.20 ppm  
 EXRSE 0.43 Hz  
 BR 60  
 REAIN

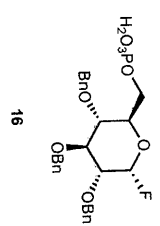

0.80177

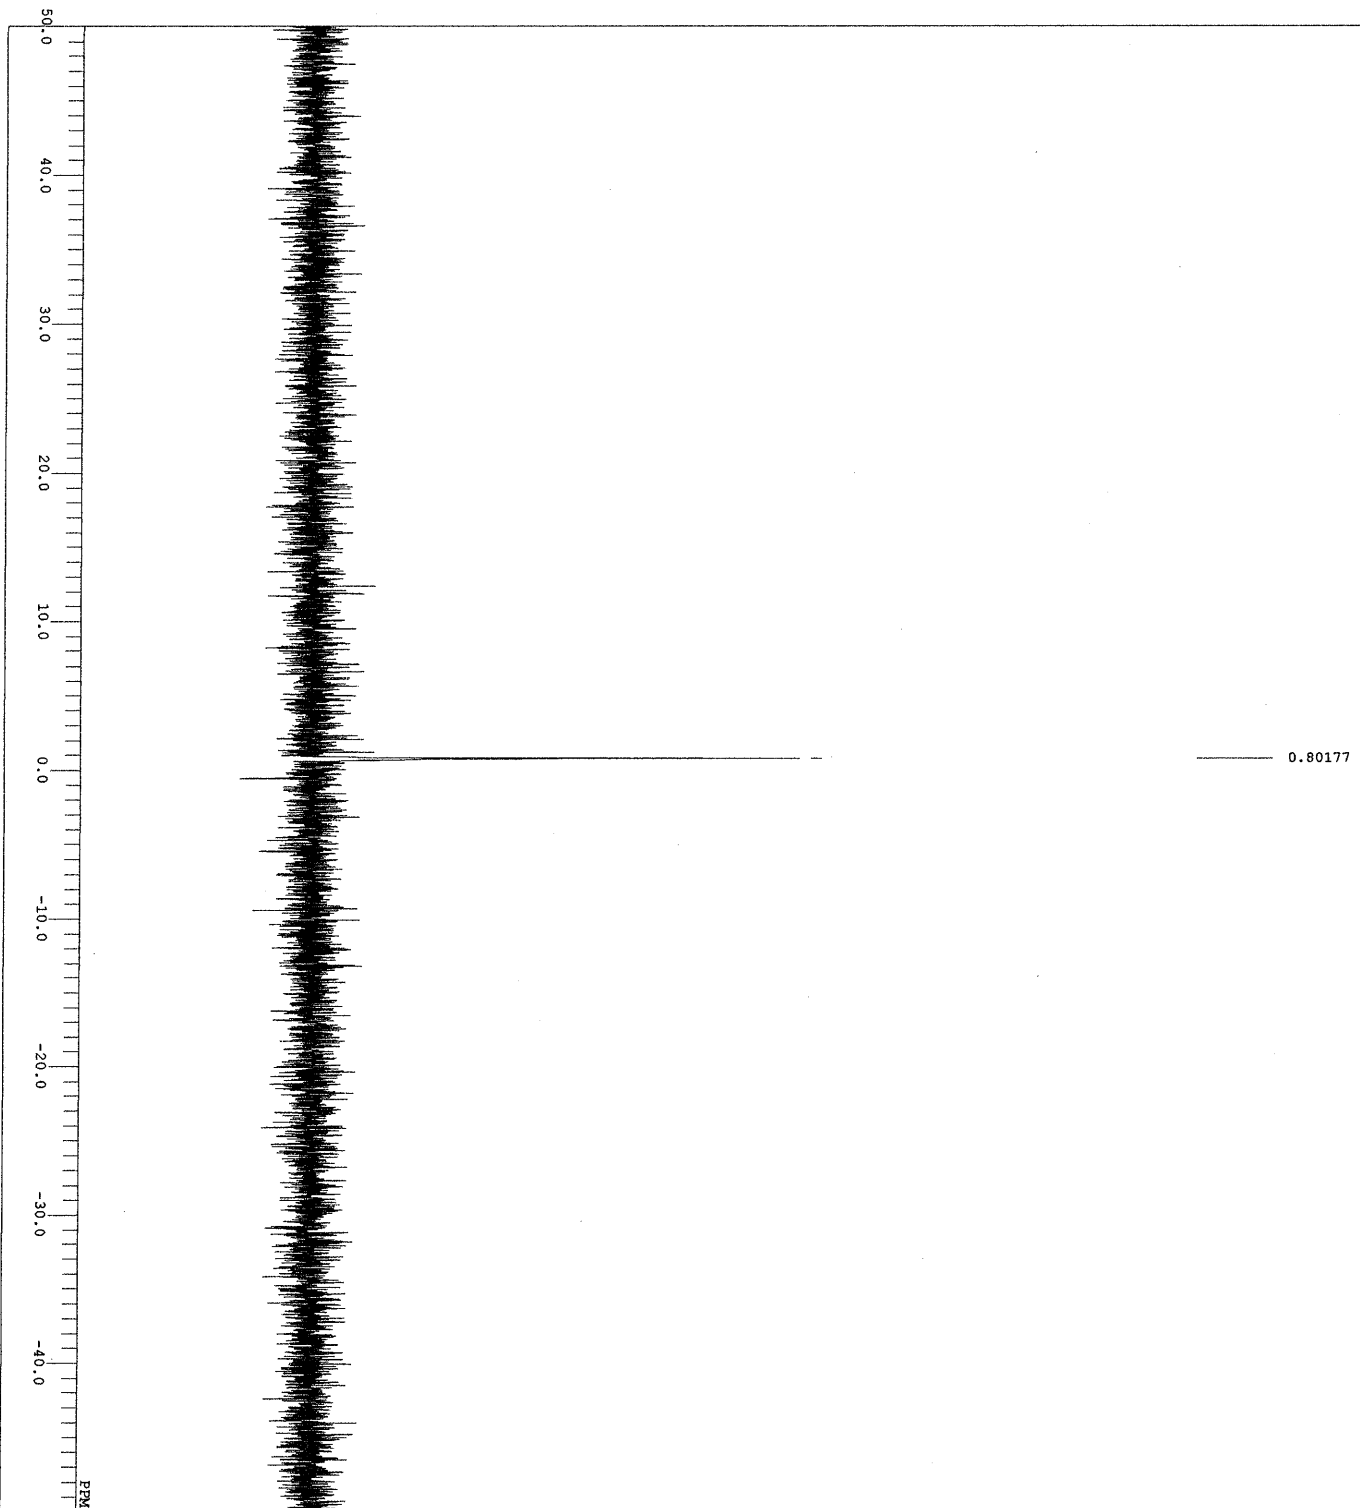

DTITLE 18K3454HPLC6\_P-1-1.als  
 COMMT  
 DATEM 13-03-2019 05:33:12  
 OBRUC 31P  
 EXRUC carbon-13P  
 OBRFO 156.58 MHz  
 OBSRT 7.99 KHz  
 OBRIN 9.23 Hz  
 POINT 26214  
 FREQOU 64102.56 Hz  
 SCANS 10  
 ACQTM 0.4089 sec  
 PD 2.0000 sec  
 PWT 4.80 usec  
 IRNUC 1H  
 CTEMP 19.6 c  
 SIVMT CD3CN  
 EXREF 0.00 ppm  
 BR 0.12 Hz  
 RGAIN 56

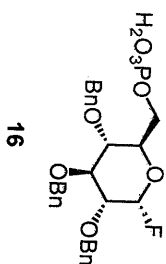

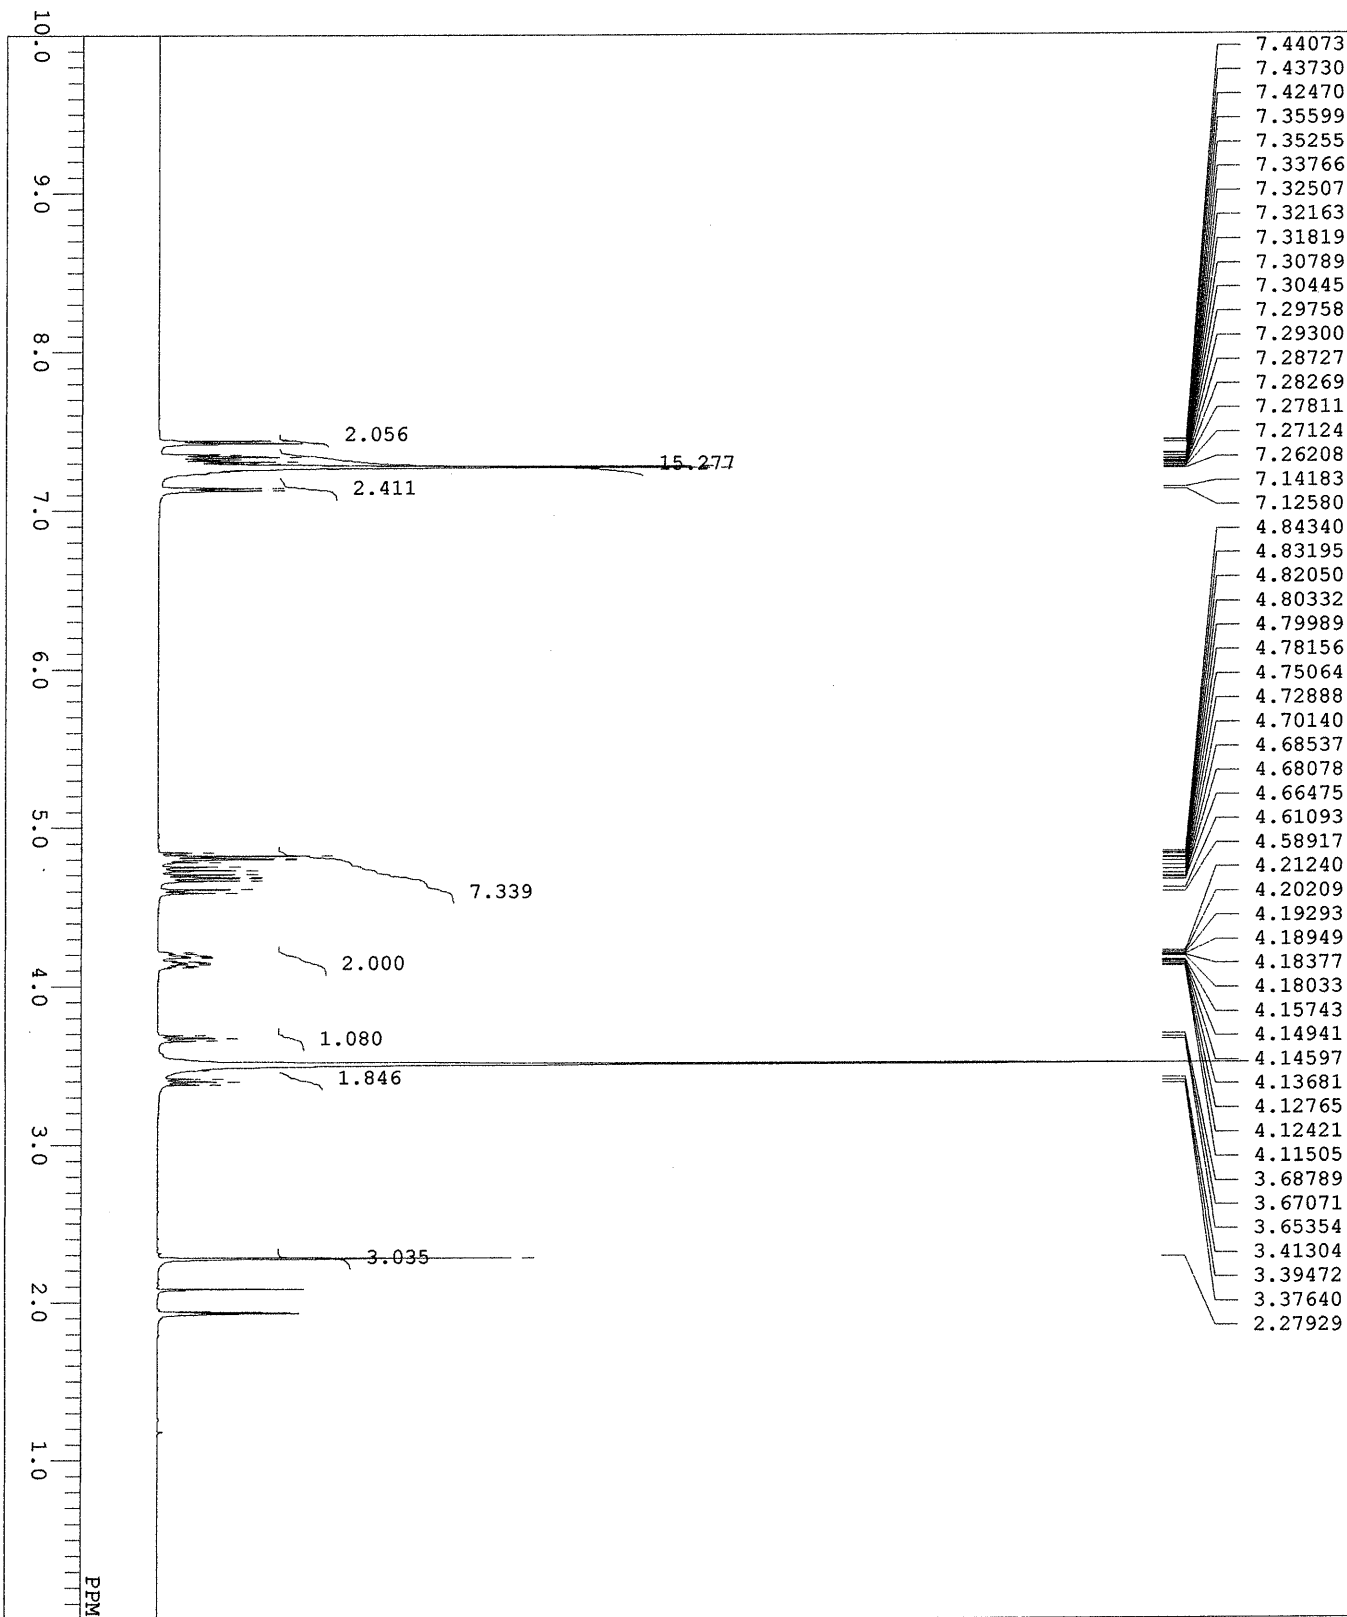

DFILE 18kq3251HPLC4-1-1.a1s  
 COMNT 2018-10-25 00:16:04  
 DATIM 1H  
 OBNDC proton.jxp  
 EXMOD 500.16 MHz  
 OBFRO 2.41 KHz  
 OBSSET 6.01 Hz  
 OBFIN 13107  
 POINT 7507.51 Hz  
 FREOU 8  
 SCANS 8  
 ACQTM 1.7459 sec  
 PD 5.0000 sec  
 PW1 5.55 usec  
 IRNUC 1H  
 CTEMP 21.4 c  
 SLVNT CD3CN  
 EXREF 1.93 ppm  
 BF 0.12 Hz  
 RGAIN 30

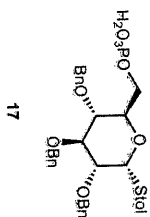



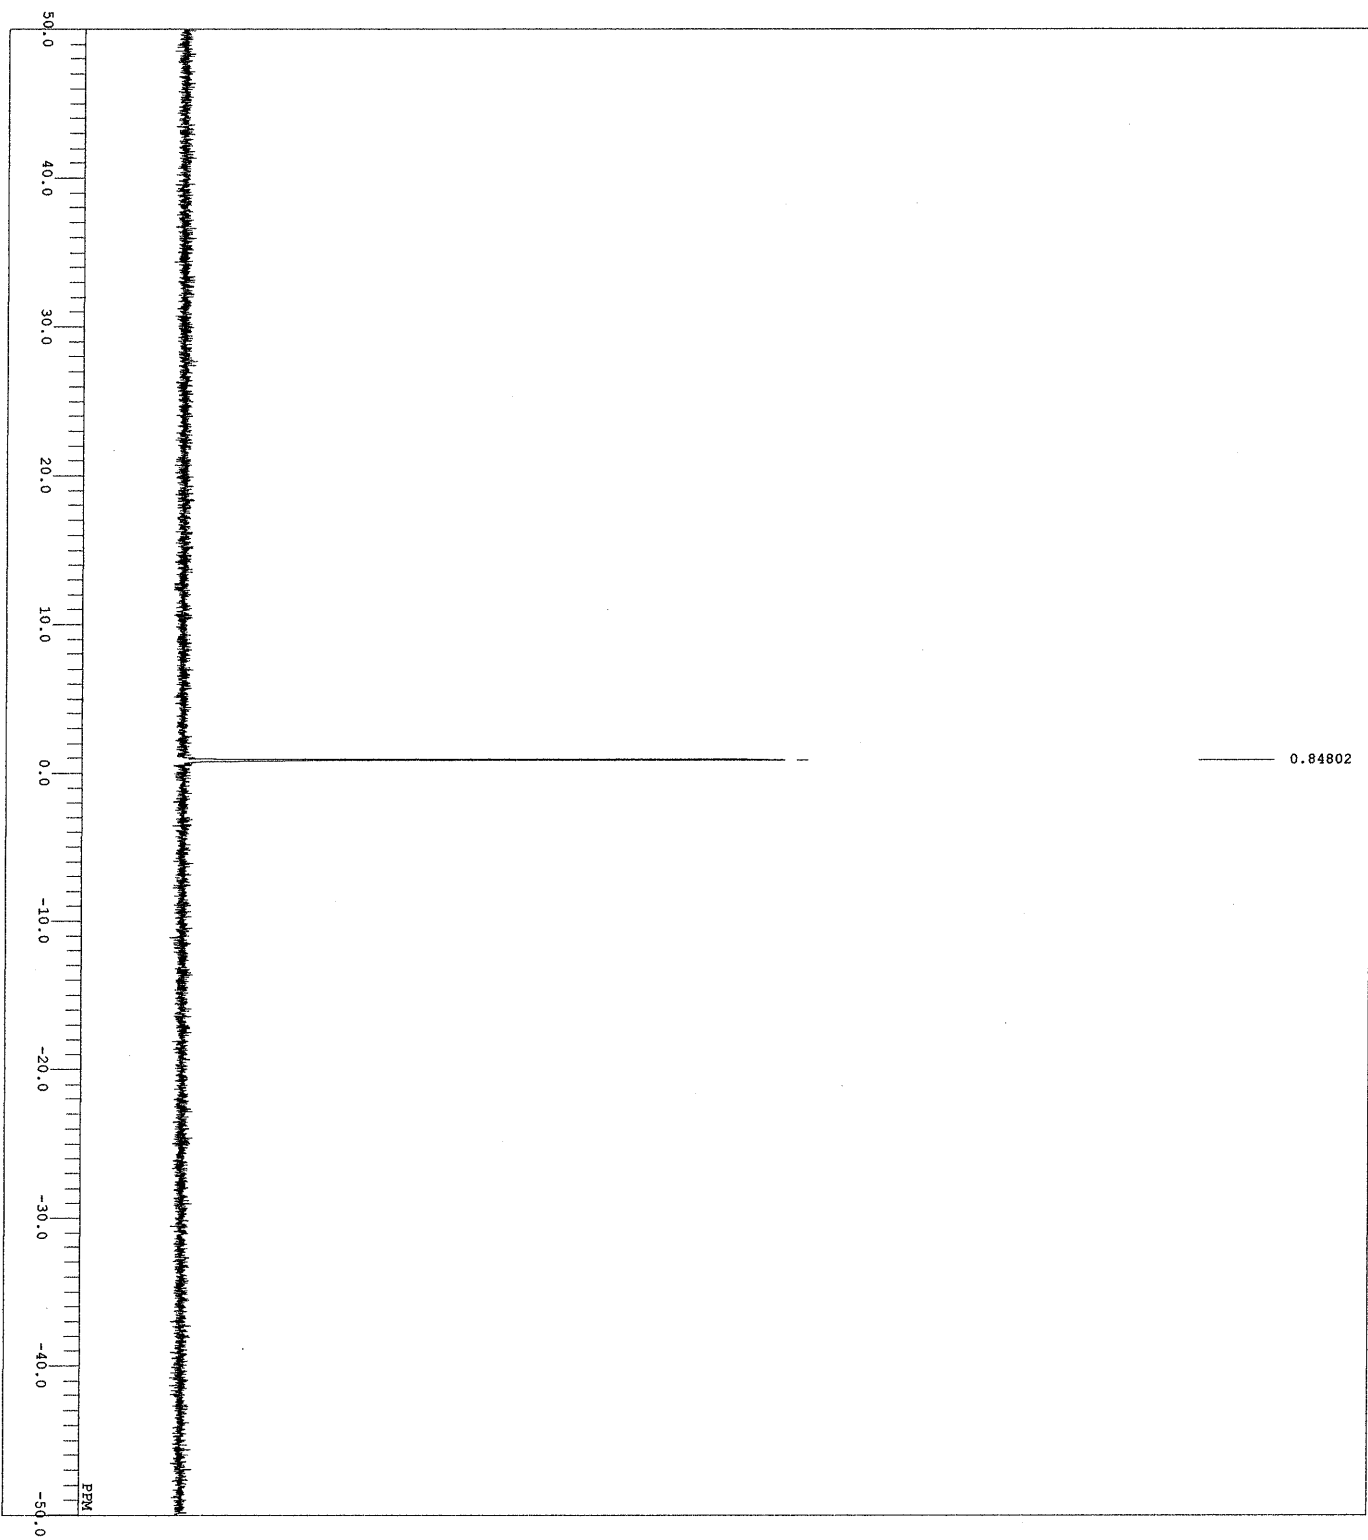

```

DETLIB 18k3455HPIC2_P-1-1.a1s
COMPT 13-03-2019 05:35:34
DATIM
ORNDIC 31P
EXMOD carbon-13p
OBFRO 158.59 MHz
OBSER 7.99 KHz
OBRIN 9.23 Hz
POINT 26214
FREOU 64102.56 Hz
SCANS 11
ACQTM 0.4089 sec
PD 2.0000 sec
PWI 4.80 usec
IRNUC 1H
CPDAP 19.7 c
SIVMT CD3CN
EXREF 0.00 ppm
BF 0.12 Hz
RGAIN 36
    
```

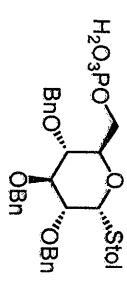

17

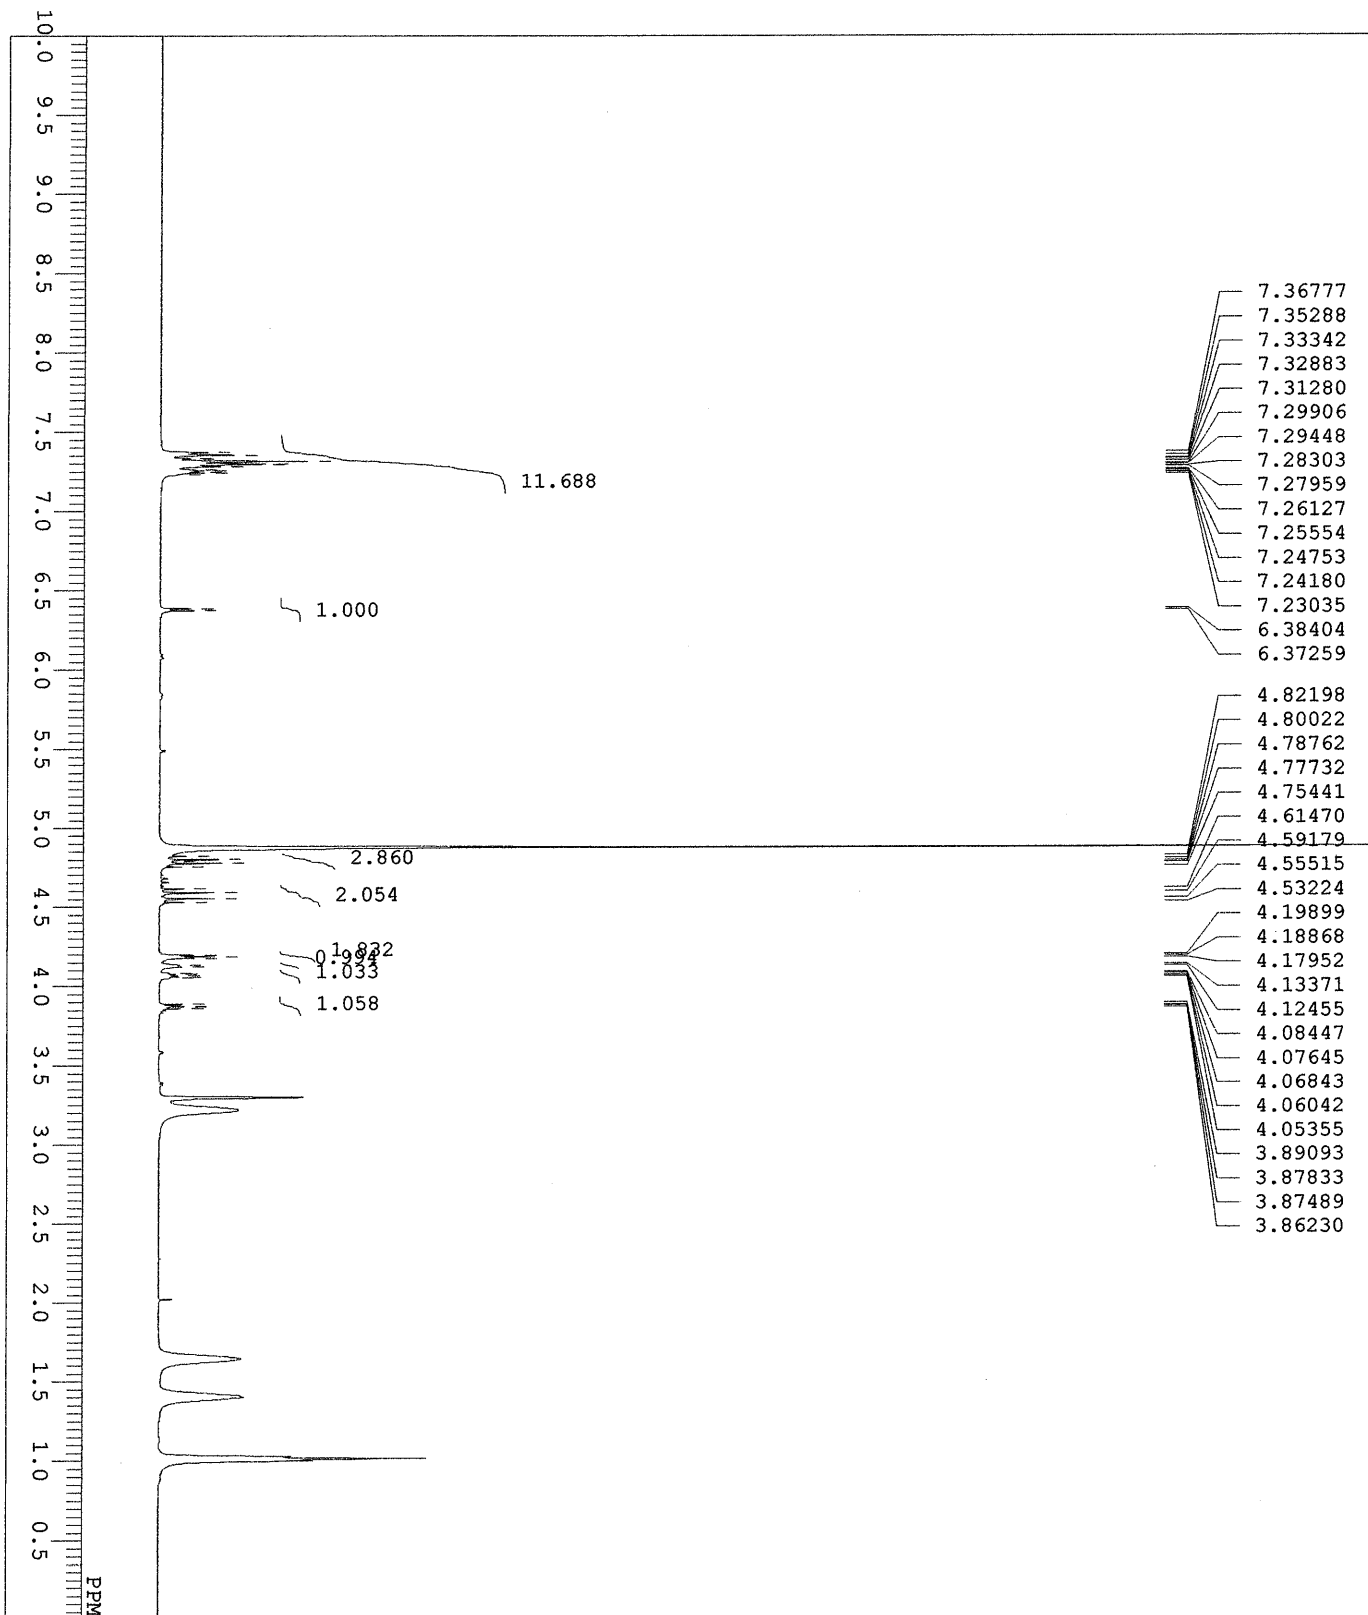

DFILE 18k3448HPLC2-1-1.als  
 COMMENT  
 DATIM 2019-03-04 08:57:50  
 OBNDC 1H  
 EXMOD proton.jxp  
 OBFRO 500.16 MHz  
 OBSFT 2.41 KHz  
 OBFIN 6.01 Hz  
 POINT 13107  
 FREQU 7507.51 Hz  
 SCANS 8  
 ACQTM 1.7459 sec  
 PD 6.0000 sec  
 PWT 5.55 usec  
 IRNUC 1H  
 CTEMP 21.5 C  
 SLVNT CD3OD  
 EXREF 3.30 ppm  
 BF 0.12 Hz  
 RGAIN 36

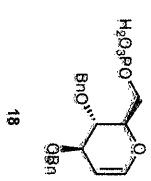



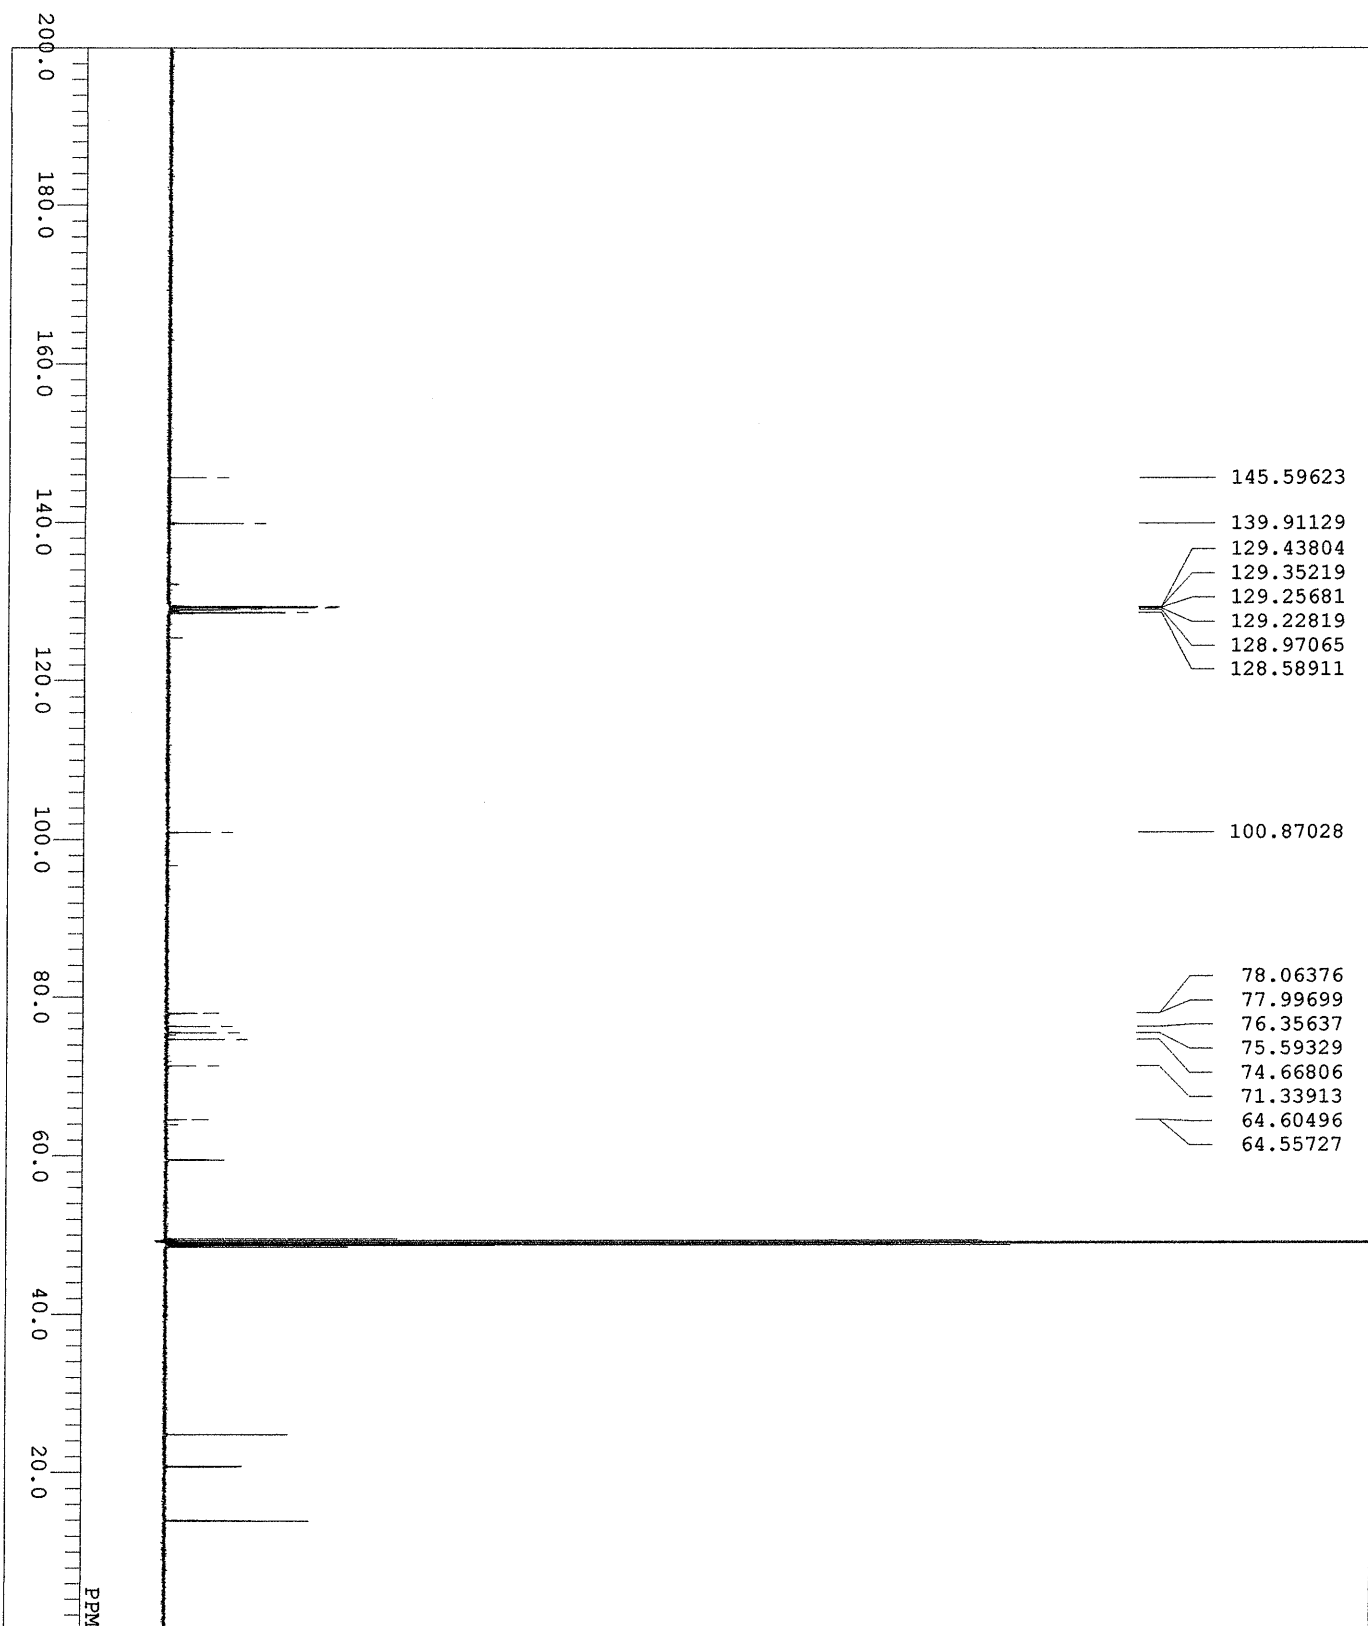

DFIL 18kd3448HPLC2\_carbon-1-1.als  
 COMMENT 13C  
 DATIM 2019-03-05 23:17:21  
 OBNUC 13C  
 EXMOD carbon.jxp  
 OBFRO 125.77 MHz  
 OBSSET 7.87 KHz  
 OBFIN 4.21 Hz  
 POINT 26214  
 FREQU 31446.54 Hz  
 SCANS 4843  
 ACQTM 0.8336 sec  
 PD 2.0000 sec  
 PW1 3.40 usec  
 IRNUC 1H  
 CTEMP 22.1 c  
 SIVNT CD3OD  
 EXREF 49.00 ppm  
 BF 0.12 Hz  
 RGAIN 60

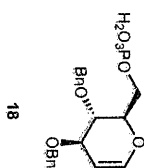







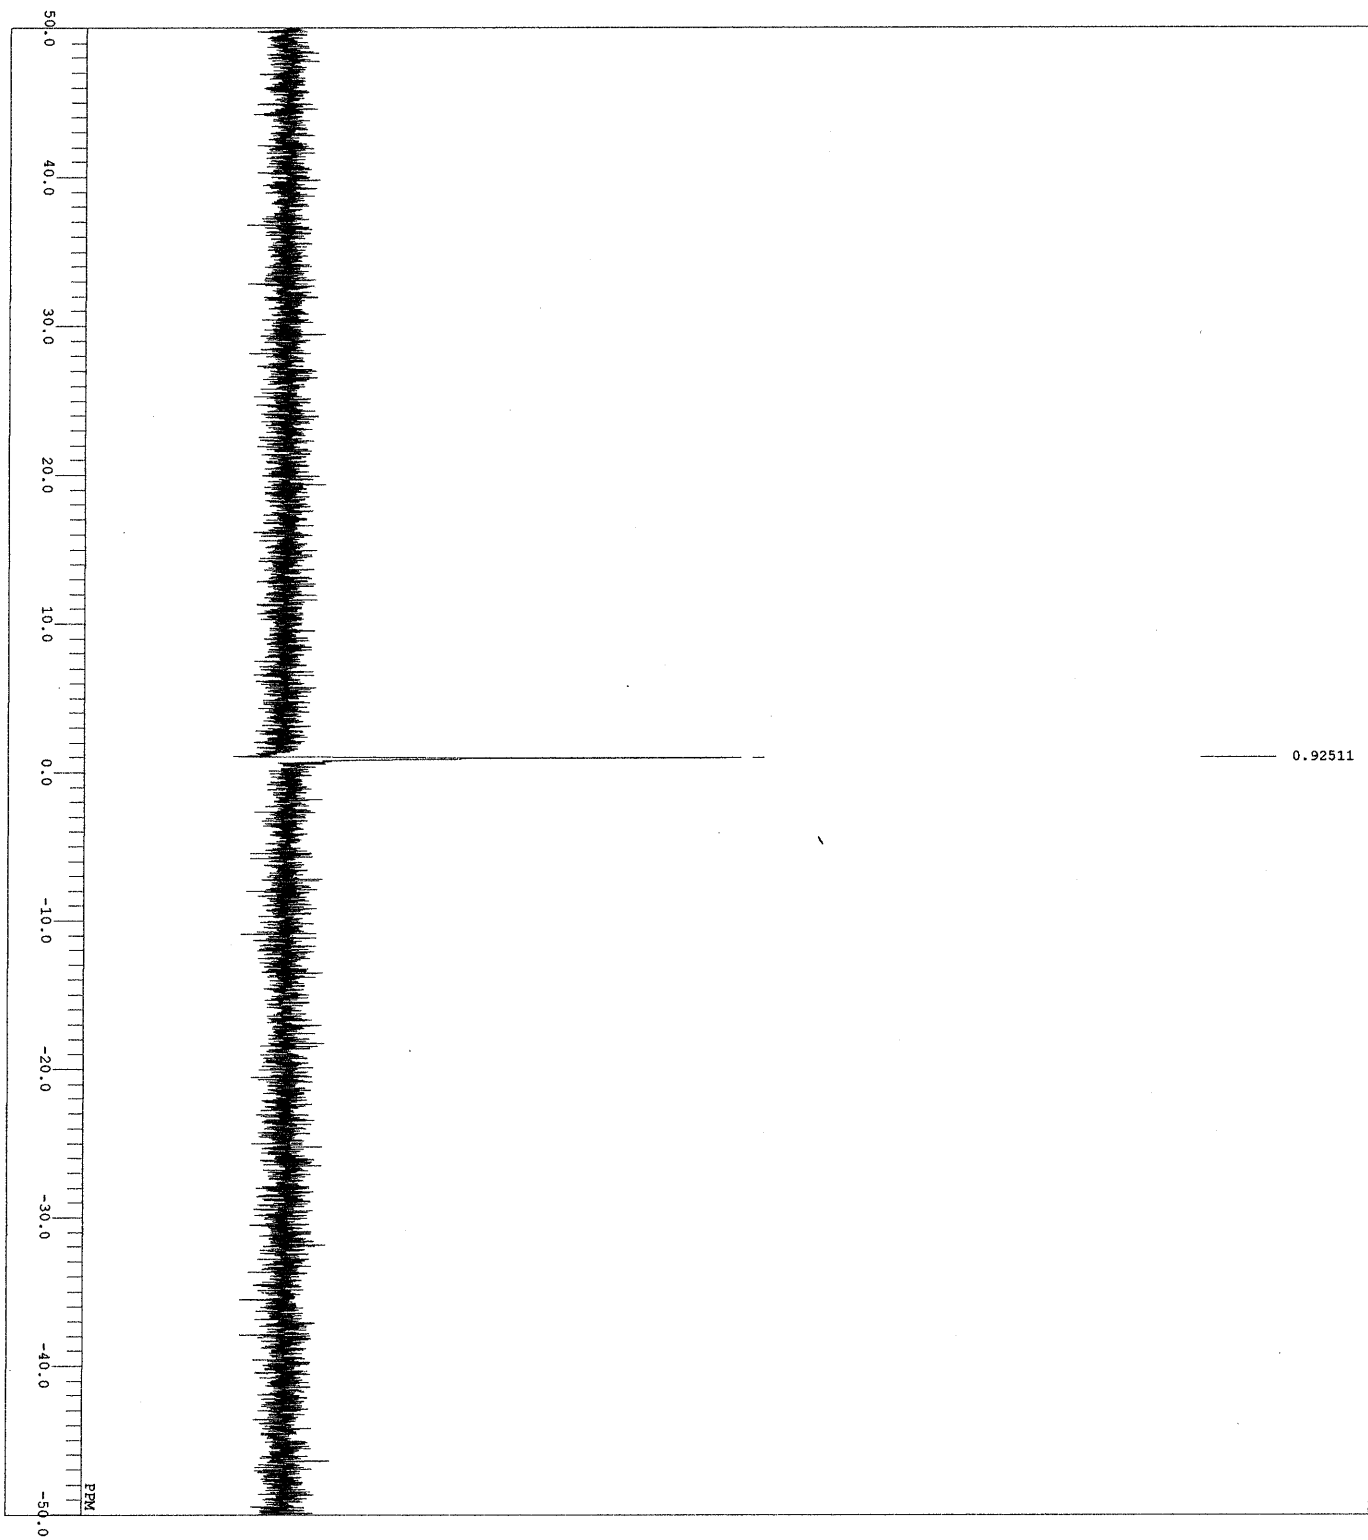

DP11E 18k3456HPLC1\_P-1-1.als  
 COM1 13-03-2019 05:38:02  
 DATA  
 OBNOC 31E  
 EXMOD carbon-13P  
 OBFRO 158.59 MHz  
 OBSER 7.99 KHz  
 OBFIN 9.23 Hz  
 POINT 26214  
 FREQU 64102.56 Hz  
 SCANS 7  
 ACQTM 0.4089 sec  
 PD 2.0000 sec  
 PUL 4.80 usec  
 INTC 1H 19.8 c  
 CTEMP 0.00 DPM  
 SLVMT 0.12 Hz  
 EXREF 56  
 RGAIN

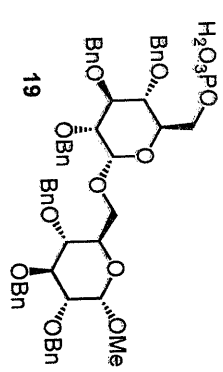

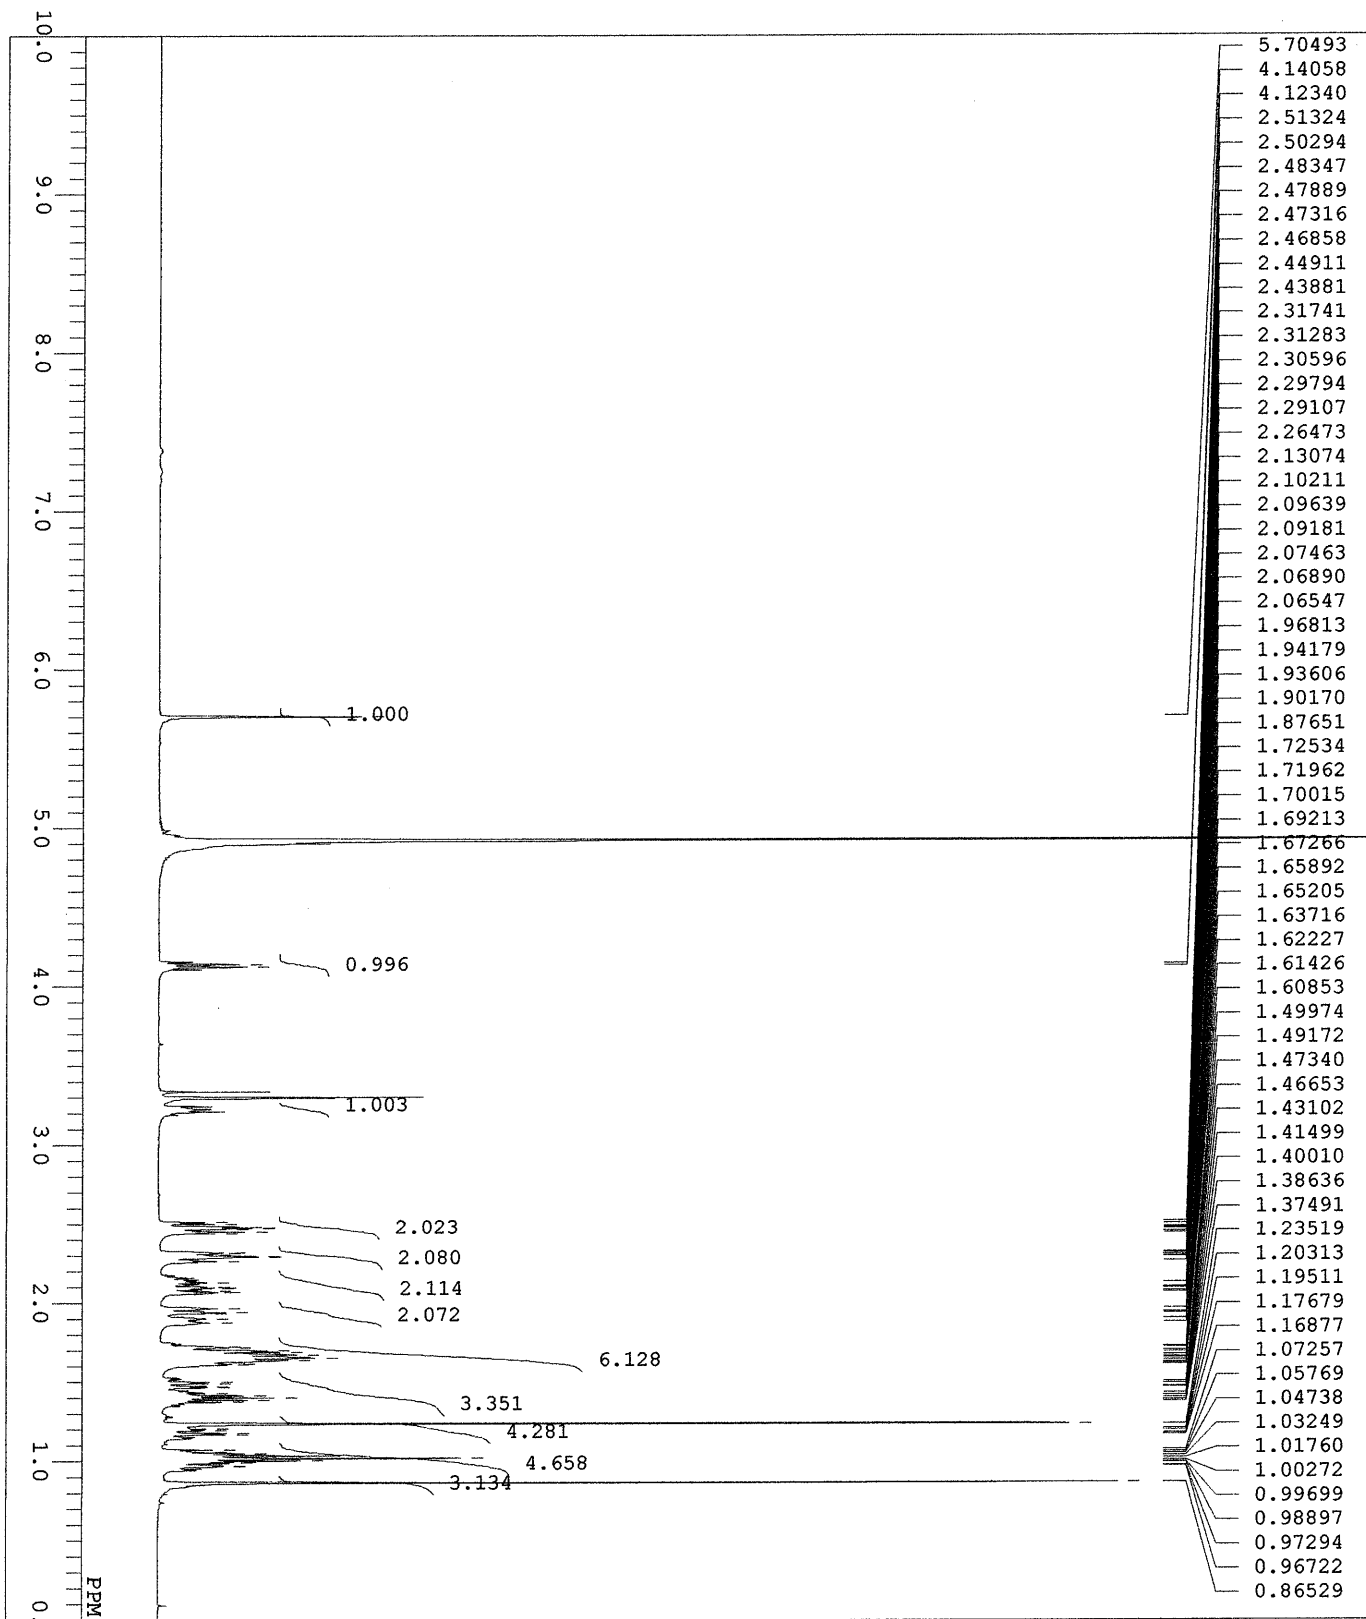

DFILE 18kd3073HPLC11-1-1.als  
 COMMENT 2018-09-01 02:34:14  
 DATIM 1H  
 OBNDC 1H  
 EXMOD proton.jxp  
 OBFRO 500.16 MHz  
 OBSET 2.41 KHz  
 OBFIN 6.01 Hz  
 POINT 13107  
 FREQU 7507.51 Hz  
 SCANS 8  
 ACQTM 1.7459 sec  
 PD 5.0000 sec  
 PWL 5.55 usec  
 IRNUC 1H  
 CTEMP 21.2 C  
 SLVNT CD3OD  
 EXREF 3.30 ppm  
 BF 0.12 Hz  
 RGAIN 28

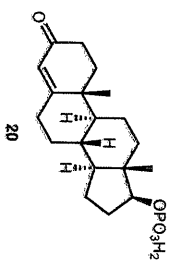

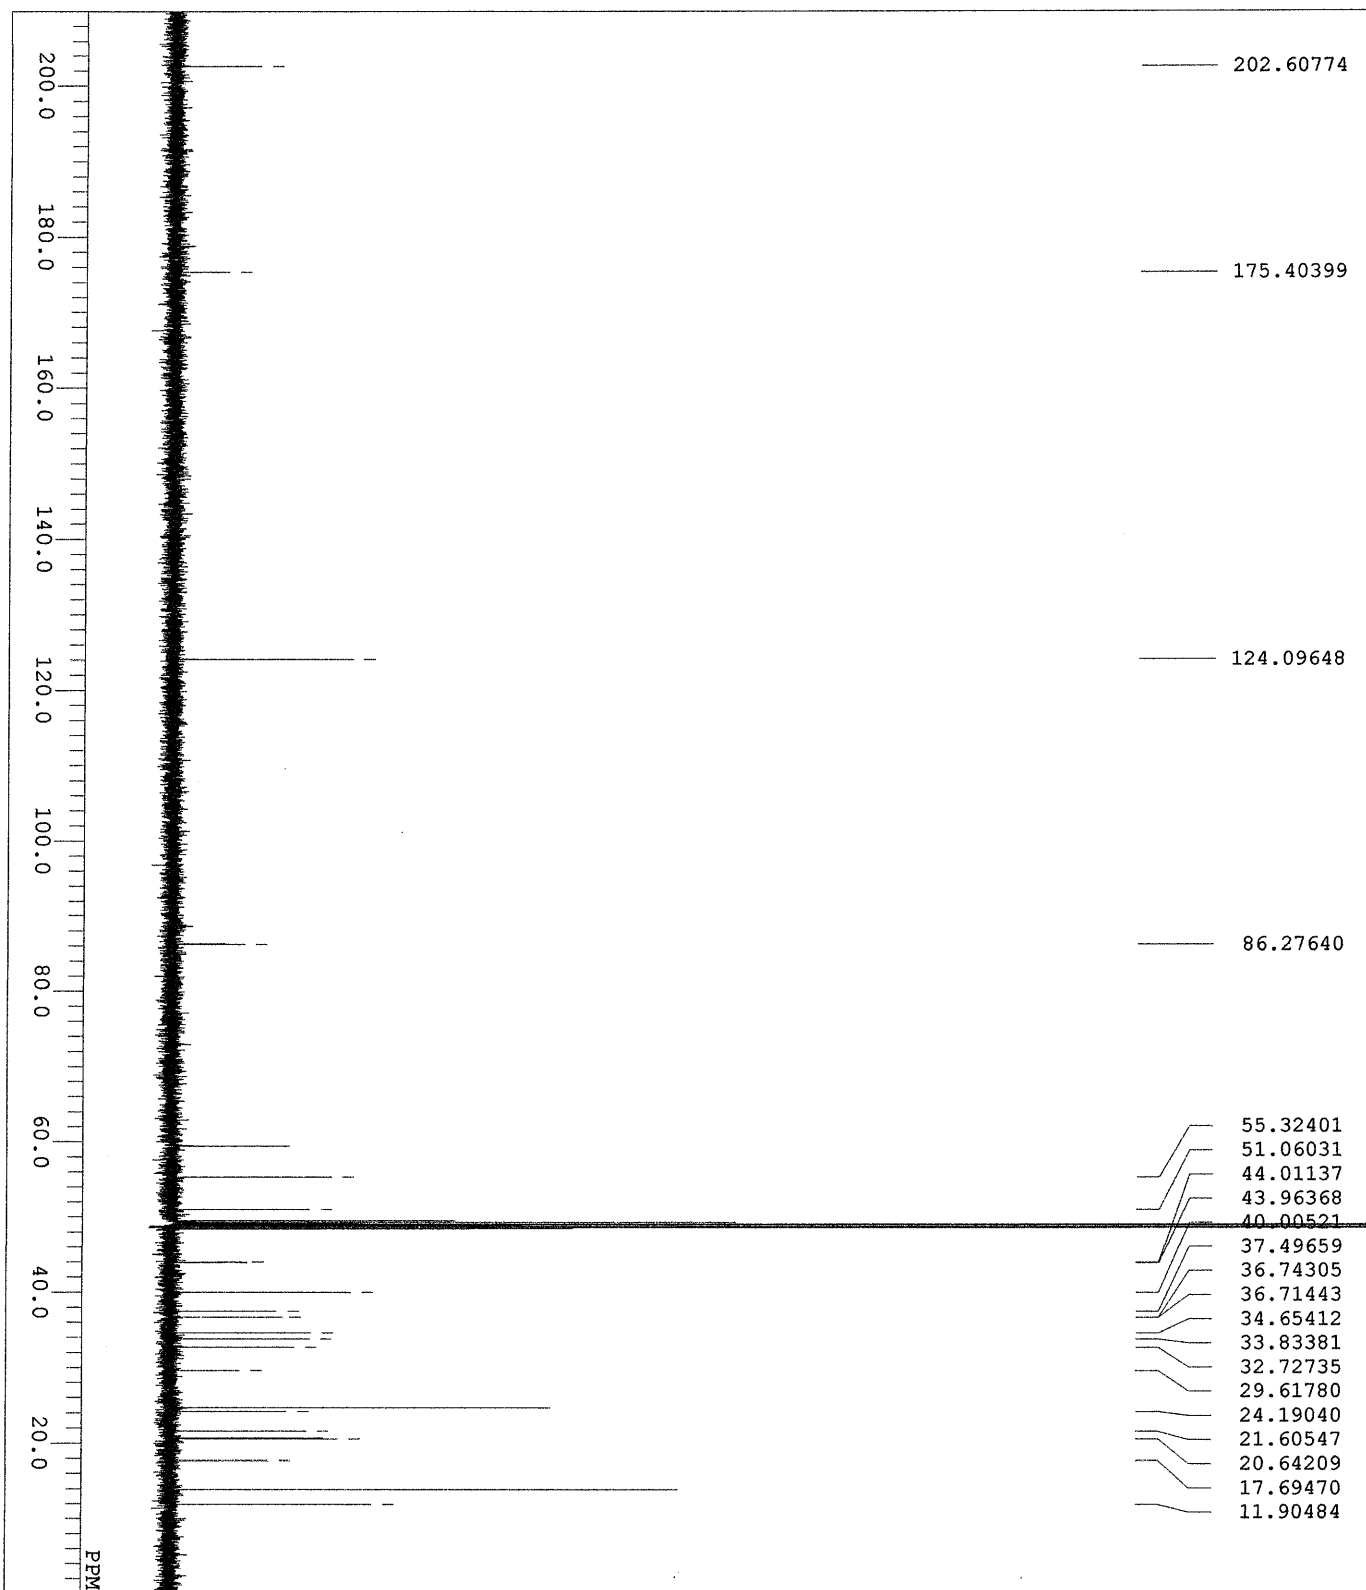

DEFILE 18kd3437tm\_carbon-1-1.als  
 COMMENT 2019-03-20 00:49:18  
 DATIM 13C  
 OBNUC carbon-jxp  
 EXMOD 125.77 MHz  
 OBFRO 7.87 KHz  
 OBSET 4.21 Hz  
 POINT 26214  
 FREQU 31446.54 Hz  
 SCANS 355  
 ACQIM 0.8336 sec  
 PD 2.0000 sec  
 PW1 3.40 usec  
 IRNUC 1H  
 CTEMP 21.9 c  
 SLVNT CD3OD  
 EXREF 49.00 ppm  
 BF 0.12 Hz  
 RGAIN 60

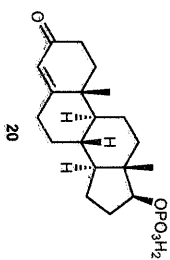

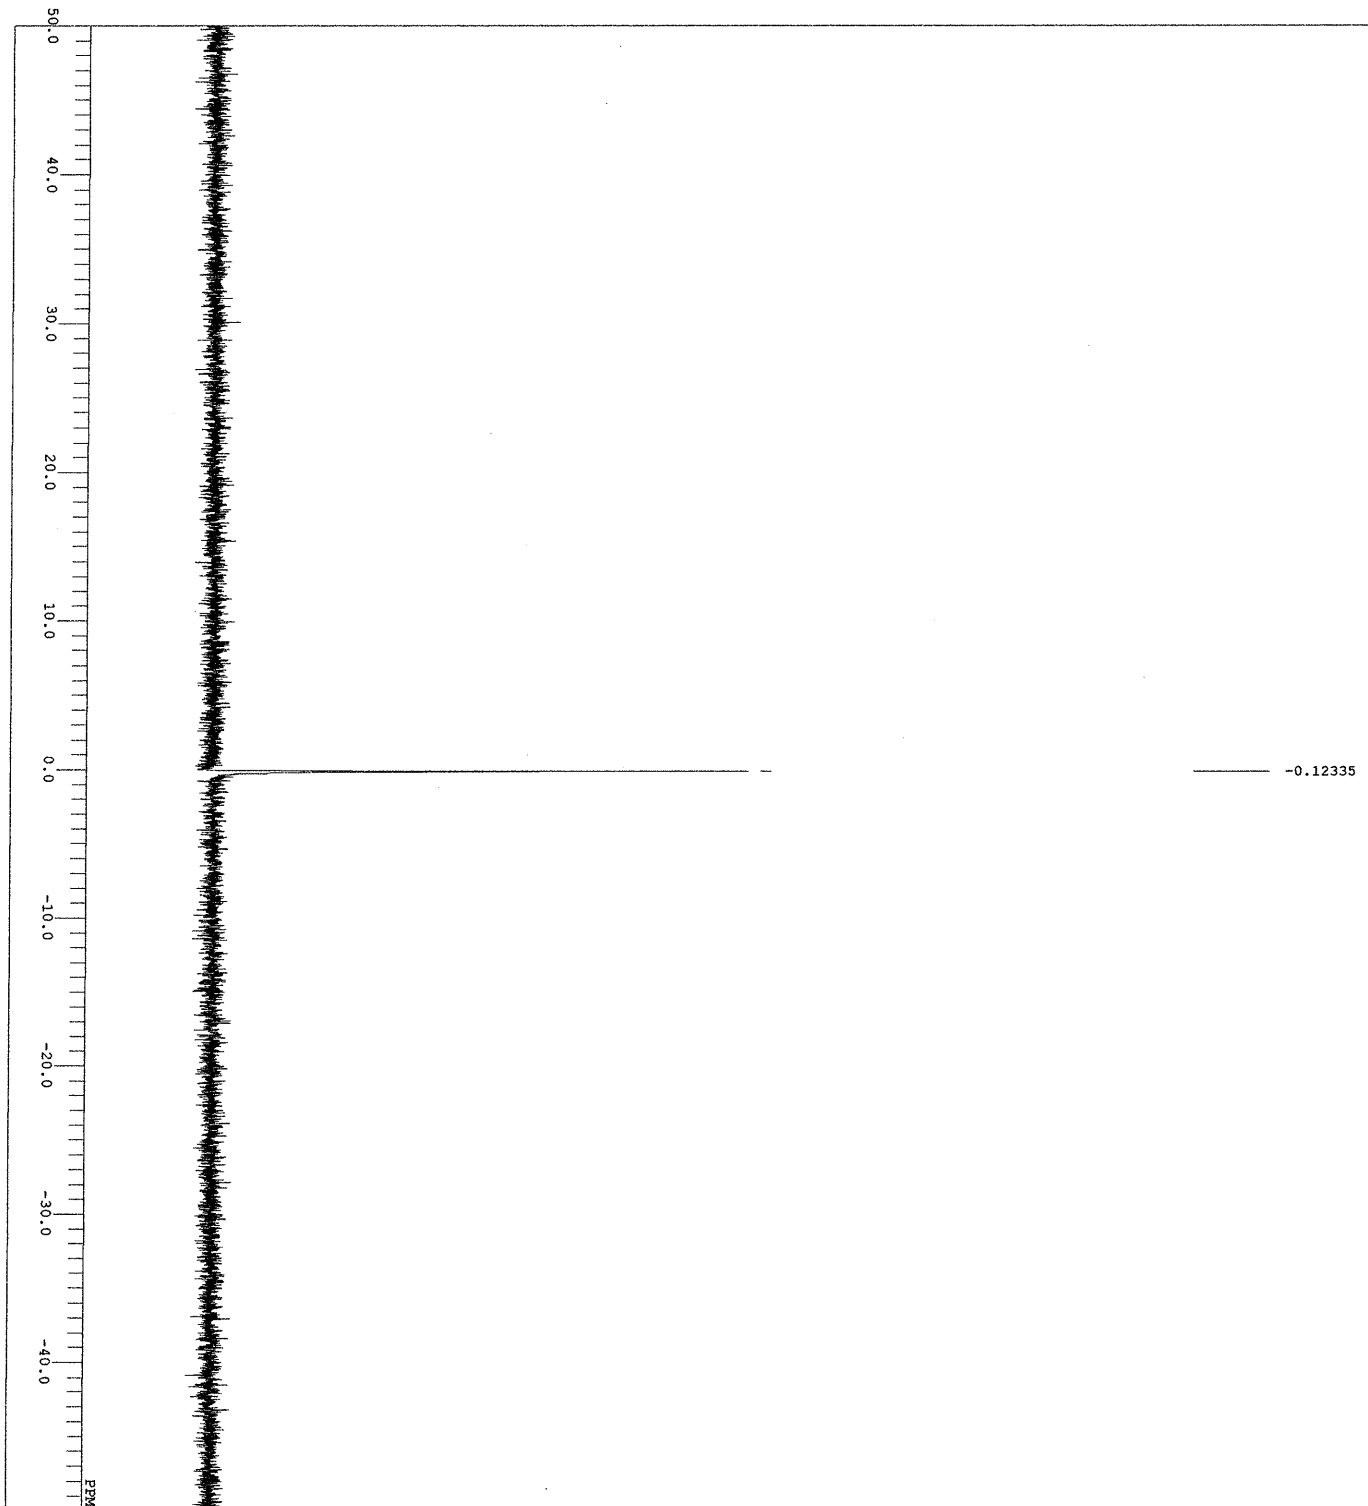

DETLE 18kd3437tm\_P-1-1.als  
 COMNT 07-03-2019 05:18:19  
 DRXIM  
 ERMDC 31P  
 EXMDC carbon.jxp  
 OBFM 158.59 MHz  
 OBFQ 7.99 KHz  
 OBFN 9.23 Hz  
 POINT 26214  
 FREQD 64102.56 Hz  
 SCANS 5  
 ACQTM 0.4089 sec  
 PD 2.0000 sec  
 PWT 4.80 usec  
 IRMTC 1H  
 CTEMP 19.9 C  
 SLVMT CD3OD  
 EXREF 0.00 PPM  
 BF 0.12 Hz  
 RGAIN 56

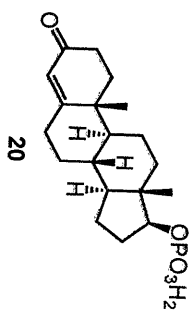



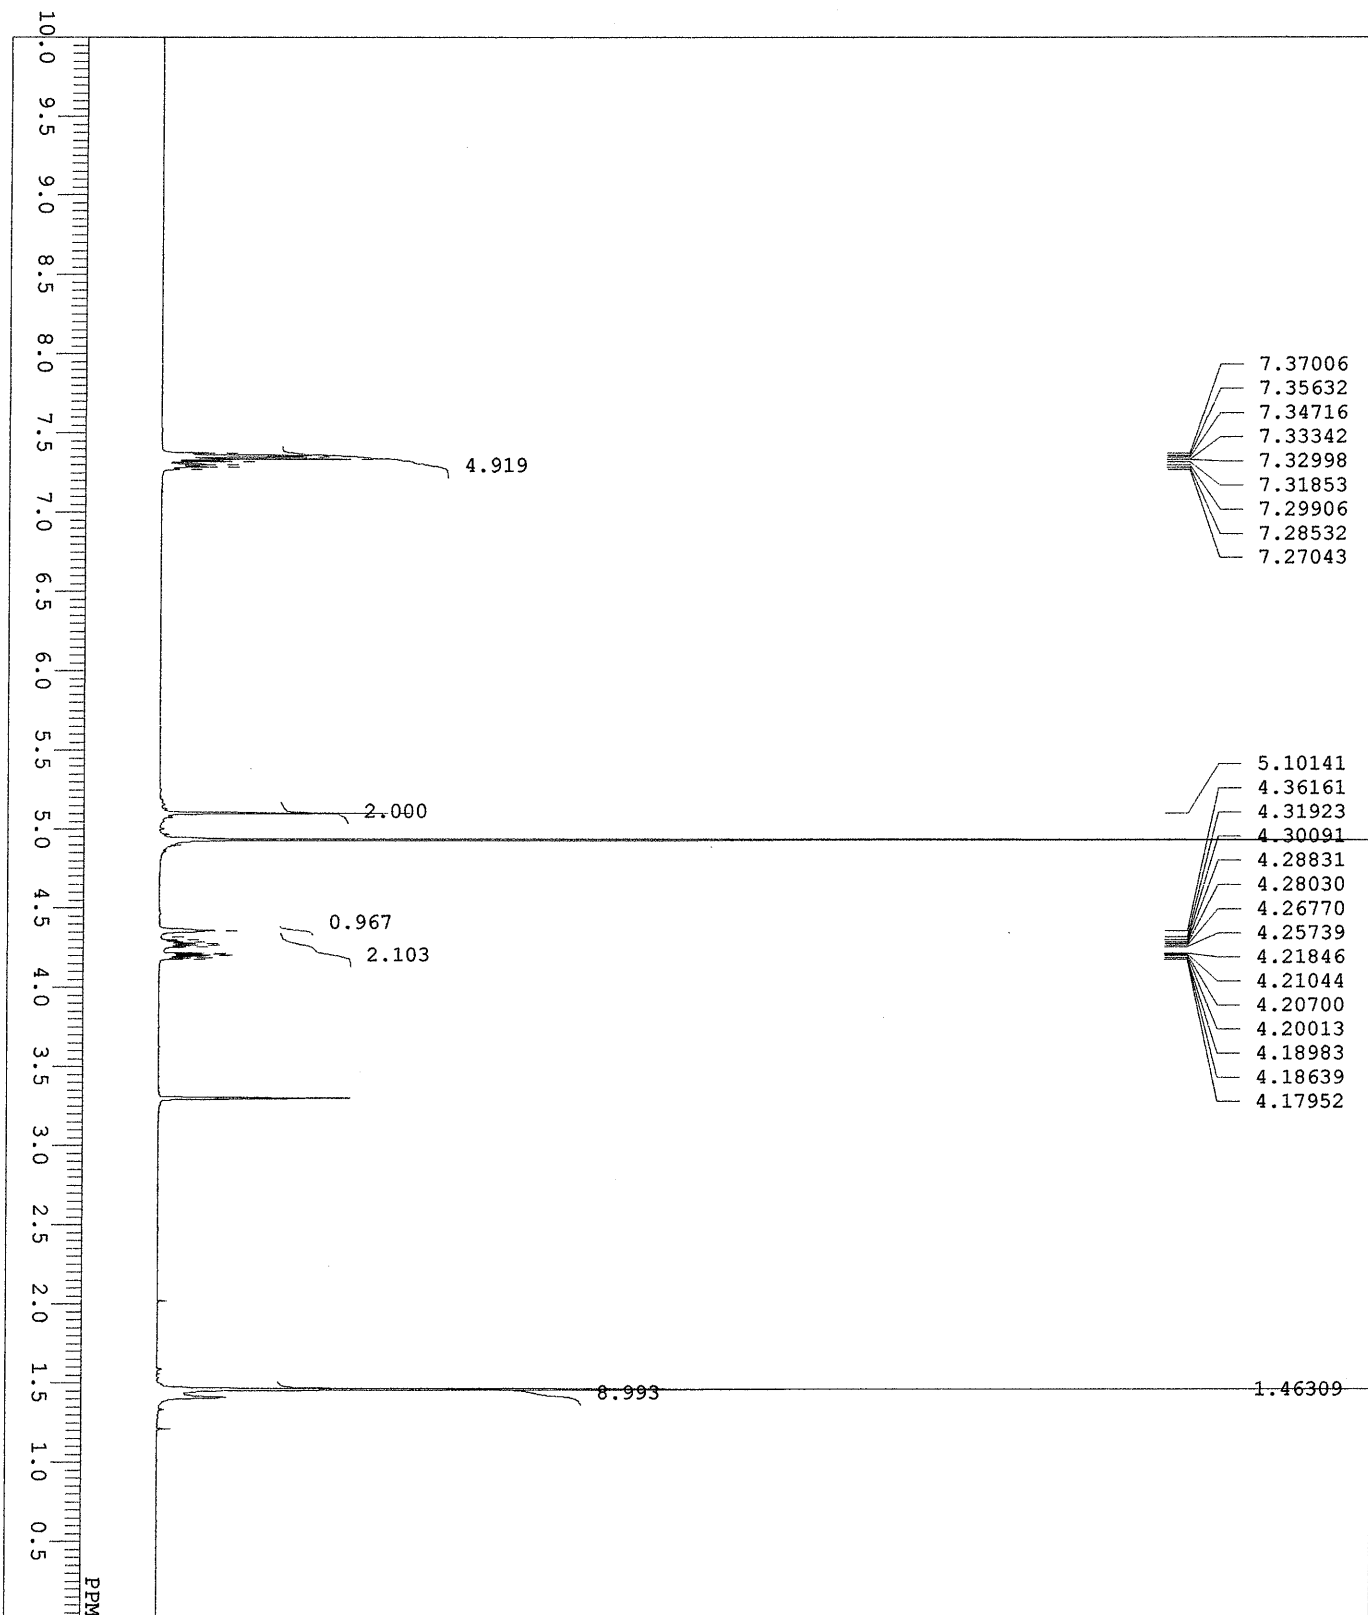

18kd3174HPLC1-1-1.ais  
 2018-10-01 02:22:51  
 1H  
 proton.jxp  
 500.16 MHz  
 2.41 KHz  
 6.01 Hz  
 13107  
 7507.51 Hz  
 4  
 1.7459 sec  
 5.0000 sec  
 5.55 usec  
 1H  
 21.8 C  
 CD3OD  
 3.30 ppm  
 0.12 Hz  
 30

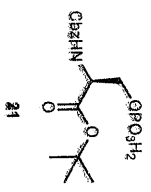

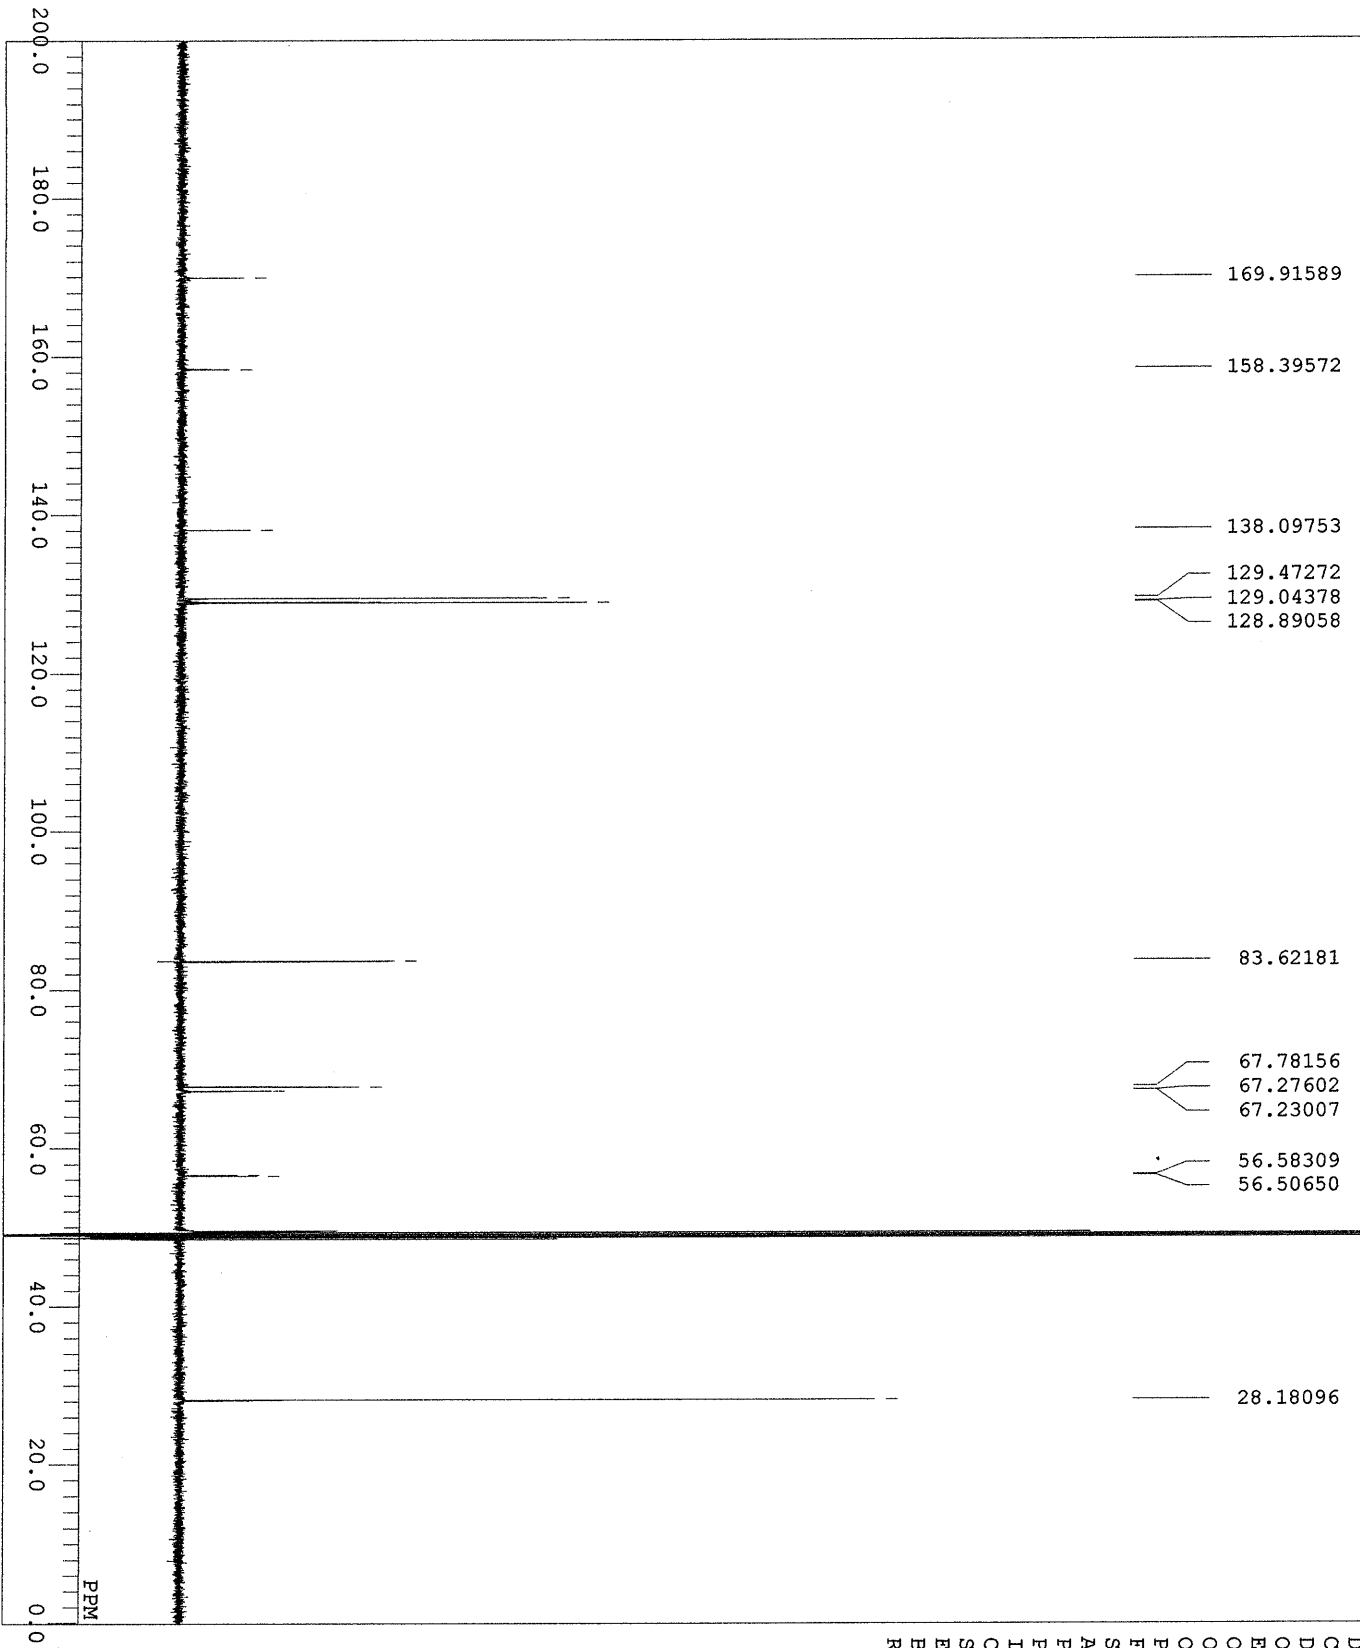

DFILF 18kd3174HPLC1\_carbon-1-1.als  
 COMNT 2018-10-01 02:23:59  
 DATIM 13C  
 OBNUC carbon.jxp  
 EXMOD 125.77 MHz  
 OBFRO 1.58 KHz  
 OBSET 5.95 Hz  
 OBFIN 26214  
 POINT 50505.05 Hz  
 FREOU 2248  
 SCANS 0.5190 sec  
 ACQTM 2.0000 sec  
 PD 3.40 usec  
 PM1  
 TRNUC 1H  
 CTEMP 22.3 C  
 SIVNT CD3OD  
 SLVNT 49.00 ppm  
 EXREF 0.12 Hz  
 BF 60  
 RGAIN

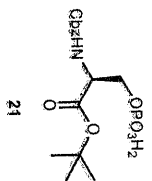

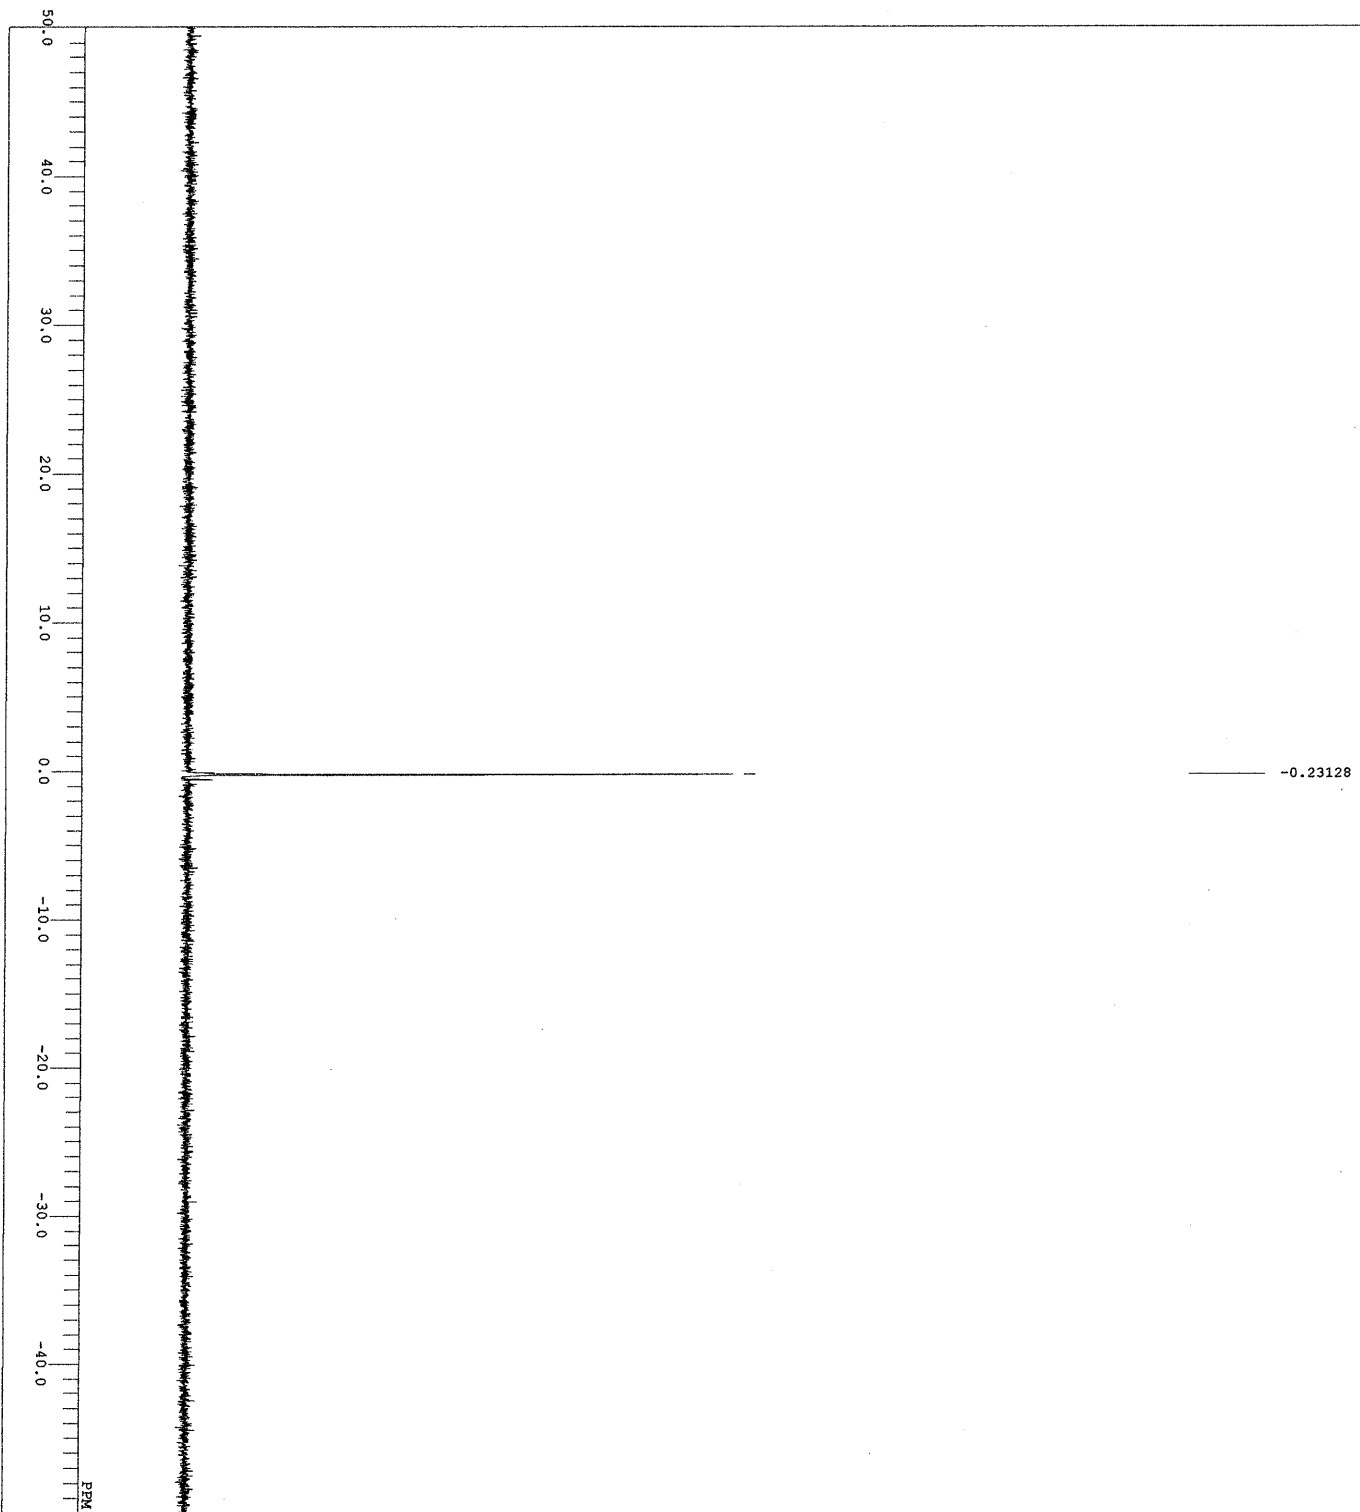

FILE 18Kd3174HP1Cl\_P-1-1.als  
 COMMENT  
 DATIM 01-10-2018 04:38:41  
 ORNAME 31P  
 EXMOD carbon\_1pp  
 ORPRG 159.59 MHz  
 OBSFT 0.99 KHz  
 OBSFM 0.23 Hz  
 POINT 28214  
 FREQ0 64102.56 Hz  
 SCANS 10  
 ACQTM 0.4089 sec  
 PD 2.0000 sec  
 PWT 4.80 usec  
 IRMTC 1H  
 CTEMP 20.2 c  
 SIVMT CD3OD  
 EXREF 0.00 ppm  
 BF 0.12 Hz  
 RGAIN 56

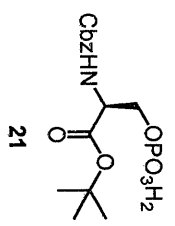

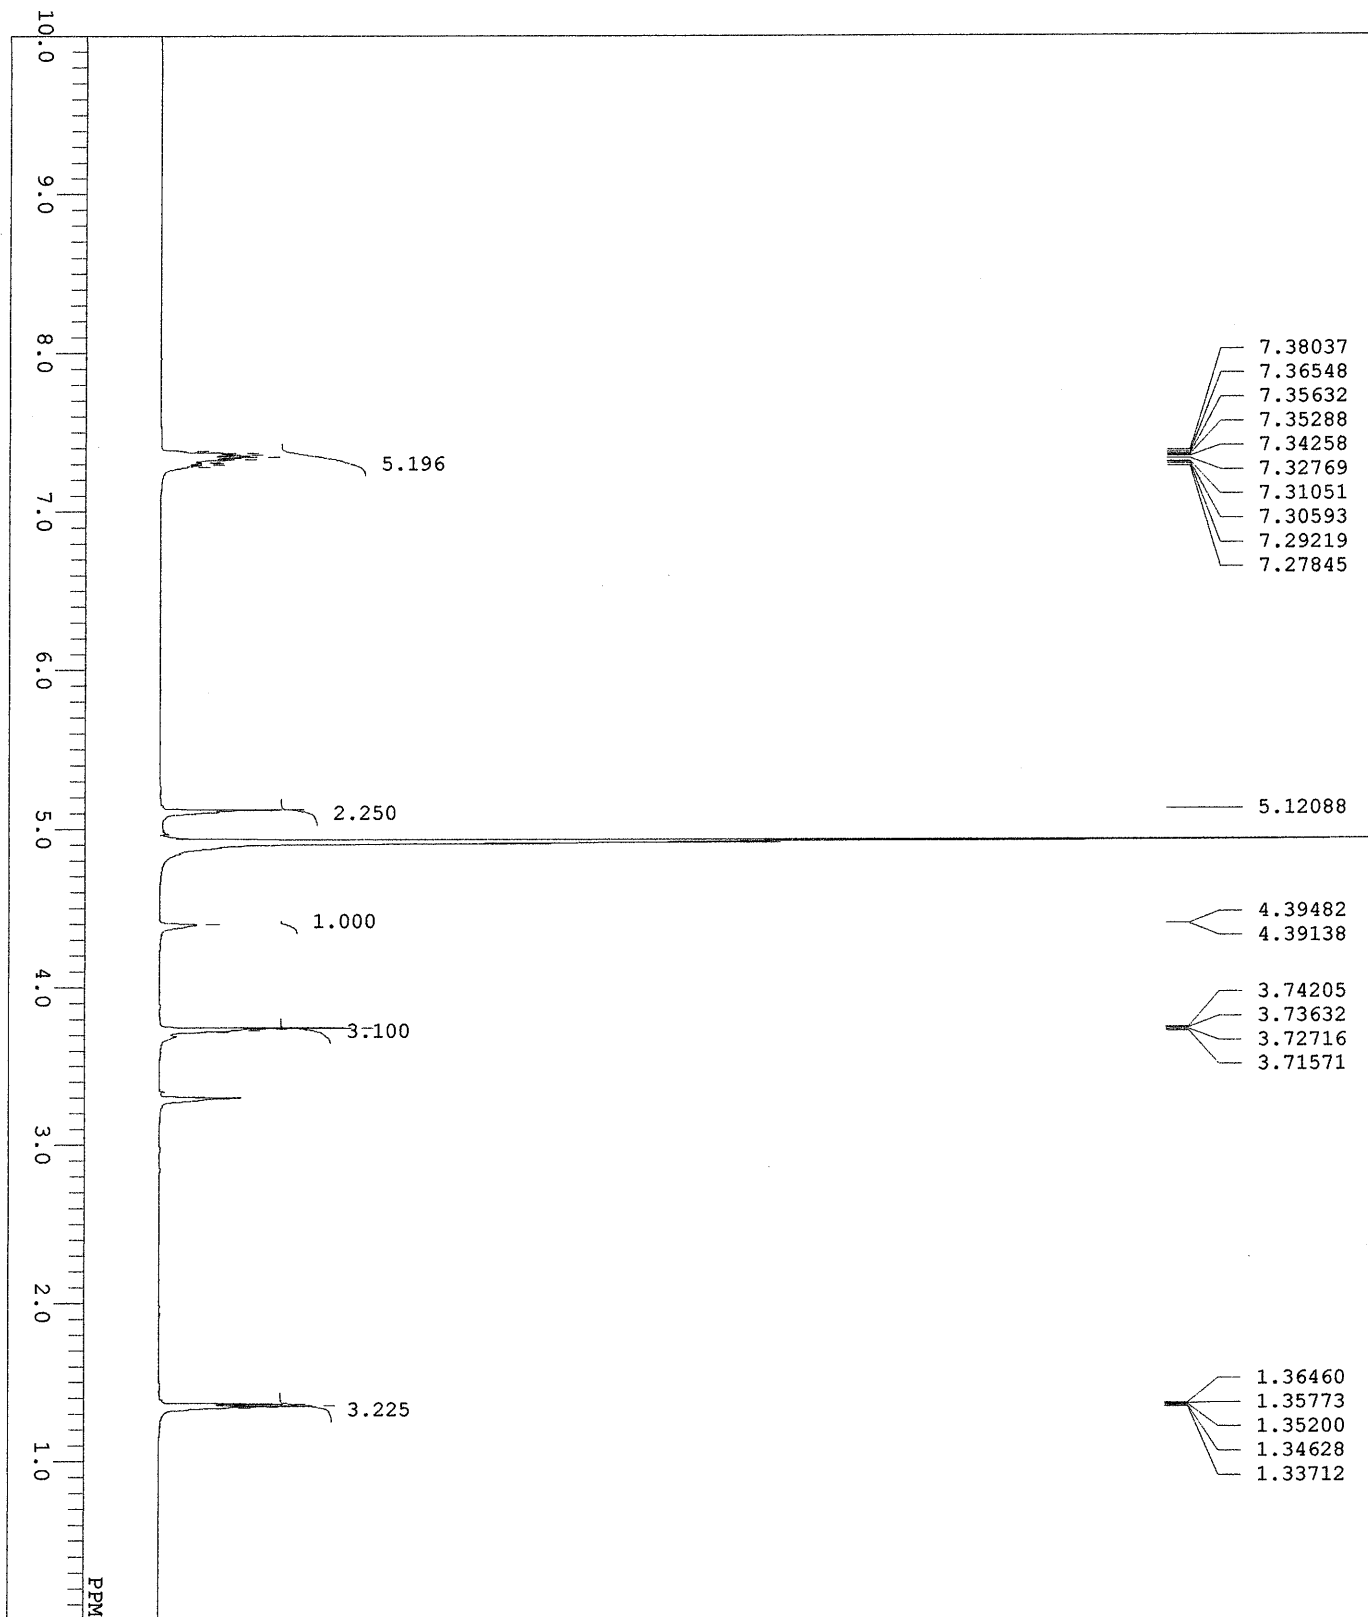

DFILE 18kd3079HPLCI-2-1-1.als  
 COMMENT  
 DATIM 2018-09-01 03:17:05  
 OBNUC 1H  
 EXMOD proton.jxp  
 OBFRO 500.16 MHz  
 OBSSET 2.41 KHz  
 OBFIN 6.01 Hz  
 POINT 13107  
 FREQU 7507.51 Hz  
 SCANS 8  
 ACQTM 1.7459 sec  
 PD 5.0000 sec  
 PM1 5.55 usec  
 IRNUC 1H  
 CTEMP 21.4 C  
 SIVNT CD3OD  
 EXREF 3.30 ppm  
 BF 0.12 Hz  
 RGAIN 30

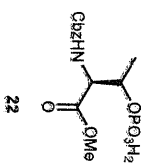

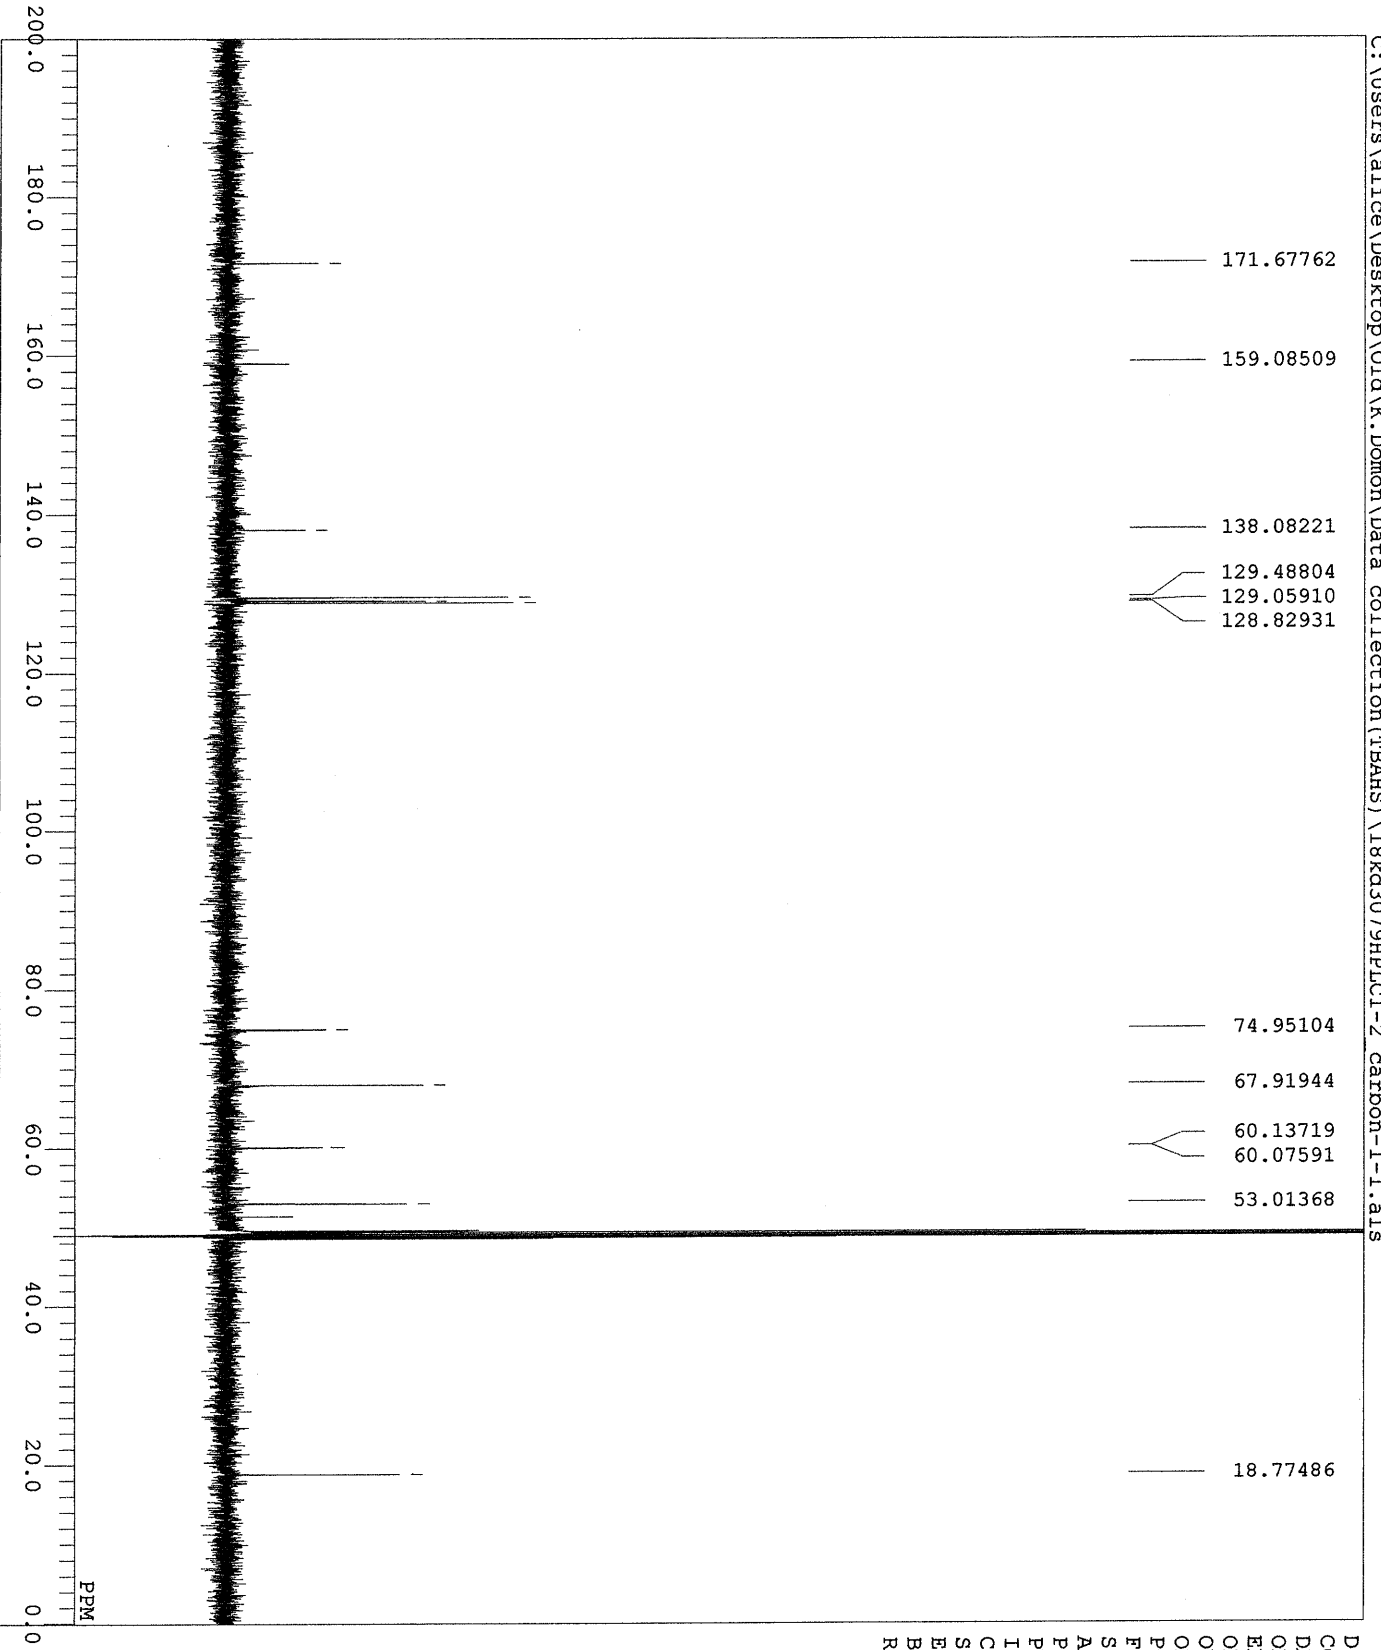

DFILE 18kd3079HPLC1-2\_carbon-1-1.als  
 COMMENT 2018-09-01 03:22:33  
 DATIM 13C  
 OBNUC carbon.fxp  
 EXMOD 125.77 MHz  
 OBFRO 1.58 KHz  
 OBSET 5.95 Hz  
 OBFIN 26214  
 POINT 50505.05 Hz  
 FREQ0 761  
 SCANS 0.5190 sec  
 ACQTM 2.0000 sec  
 PD 3.40 usec  
 PW1  
 IRNUC 1H  
 CTEMP 21.9 C  
 SLVNT CD3OD  
 EXREF 49.00 ppm  
 BF 0.12 Hz  
 RGAIN 60

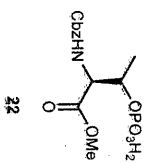

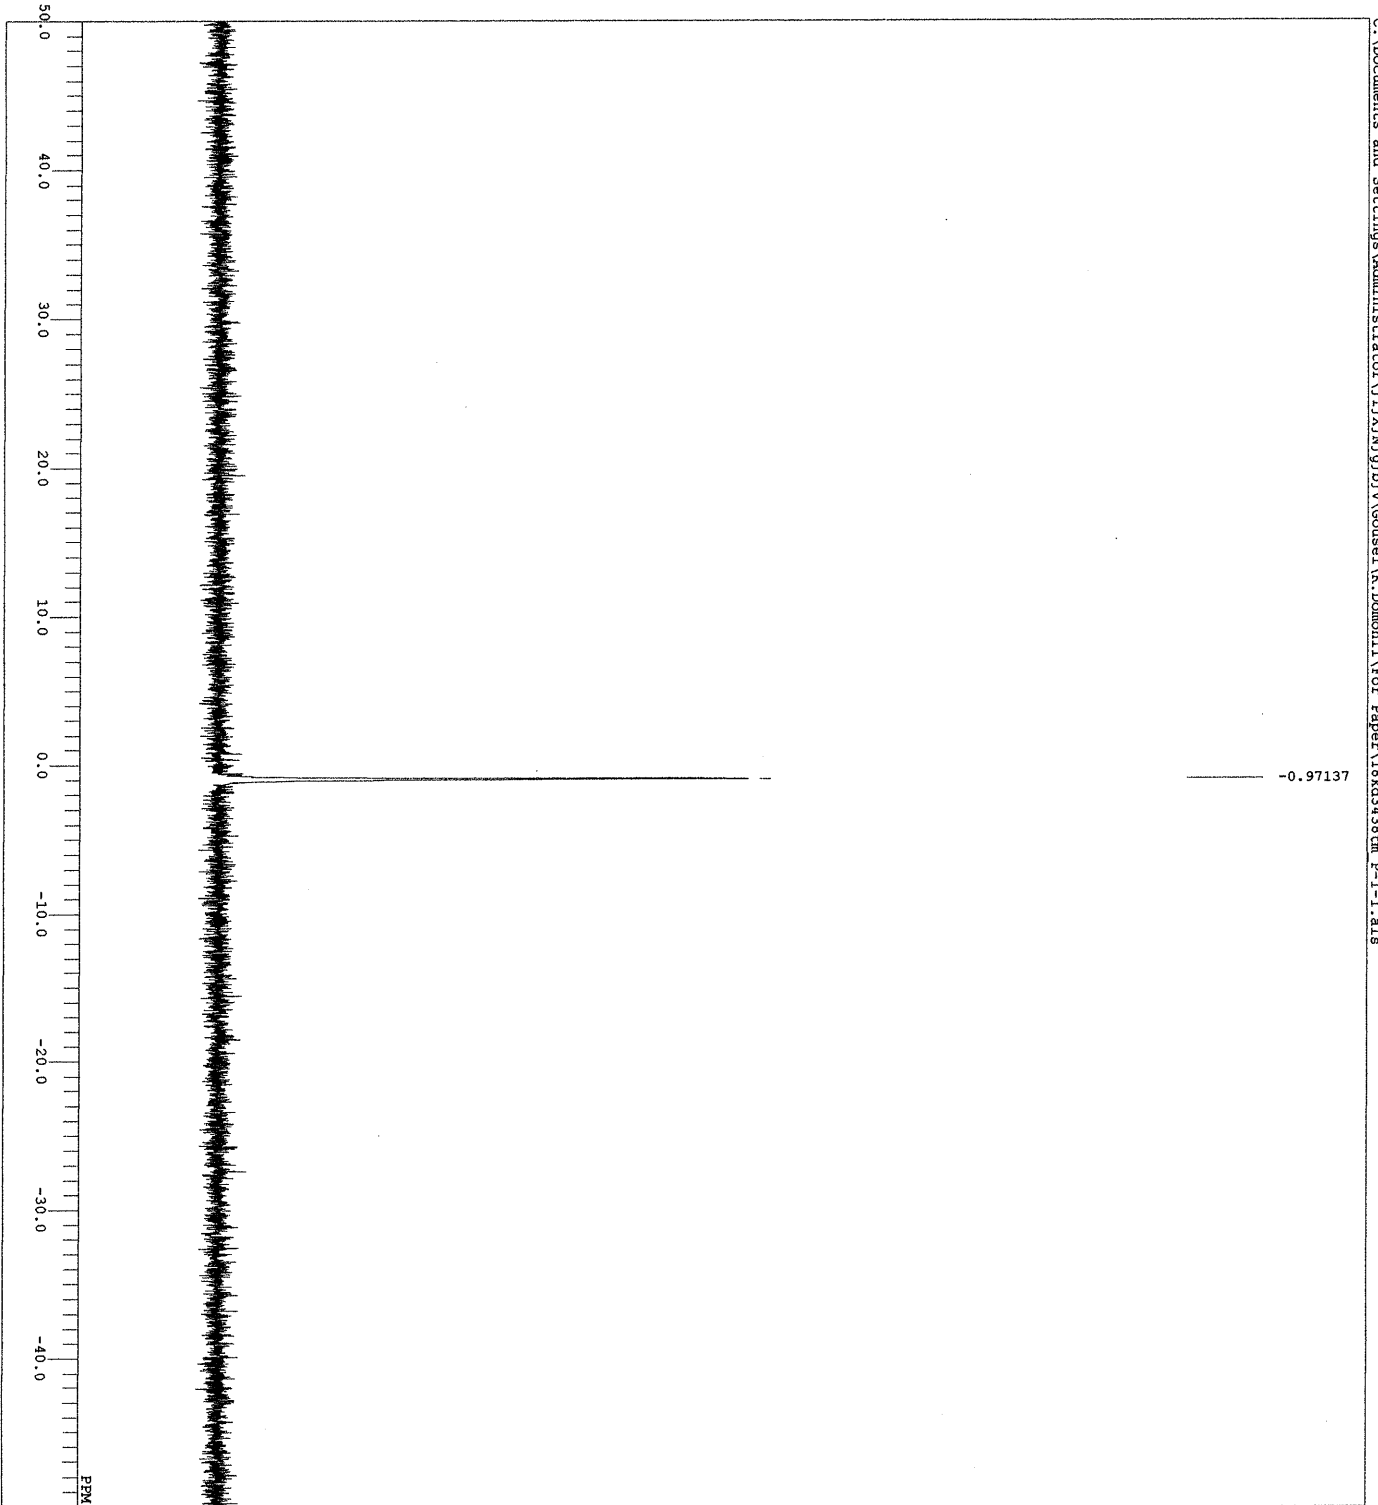

FILE 18kd3438tm\_P-1-1.a1s  
 COMNT  
 DATIM 07-03-2019 05:20:26  
 OBNUC 31P  
 EXMOD carbon\_1xp  
 OBFRO 158.59 MHz  
 OBSFT 7.99 KHz  
 OBRTN 9.23 Hz  
 POINT 28214  
 FREQD 64102.56 Hz  
 SCANS 13  
 ACQTM 0.4089 sec  
 PD 2.0000 sec  
 PVI 4.80 usec  
 IRNUC 1H  
 CTEMP 19.9 c  
 SLEWT CD3OD  
 EXREF 0.00 ppm  
 BF 0.12 Hz  
 RGAIN 56

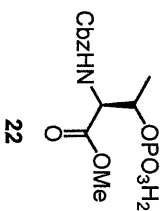

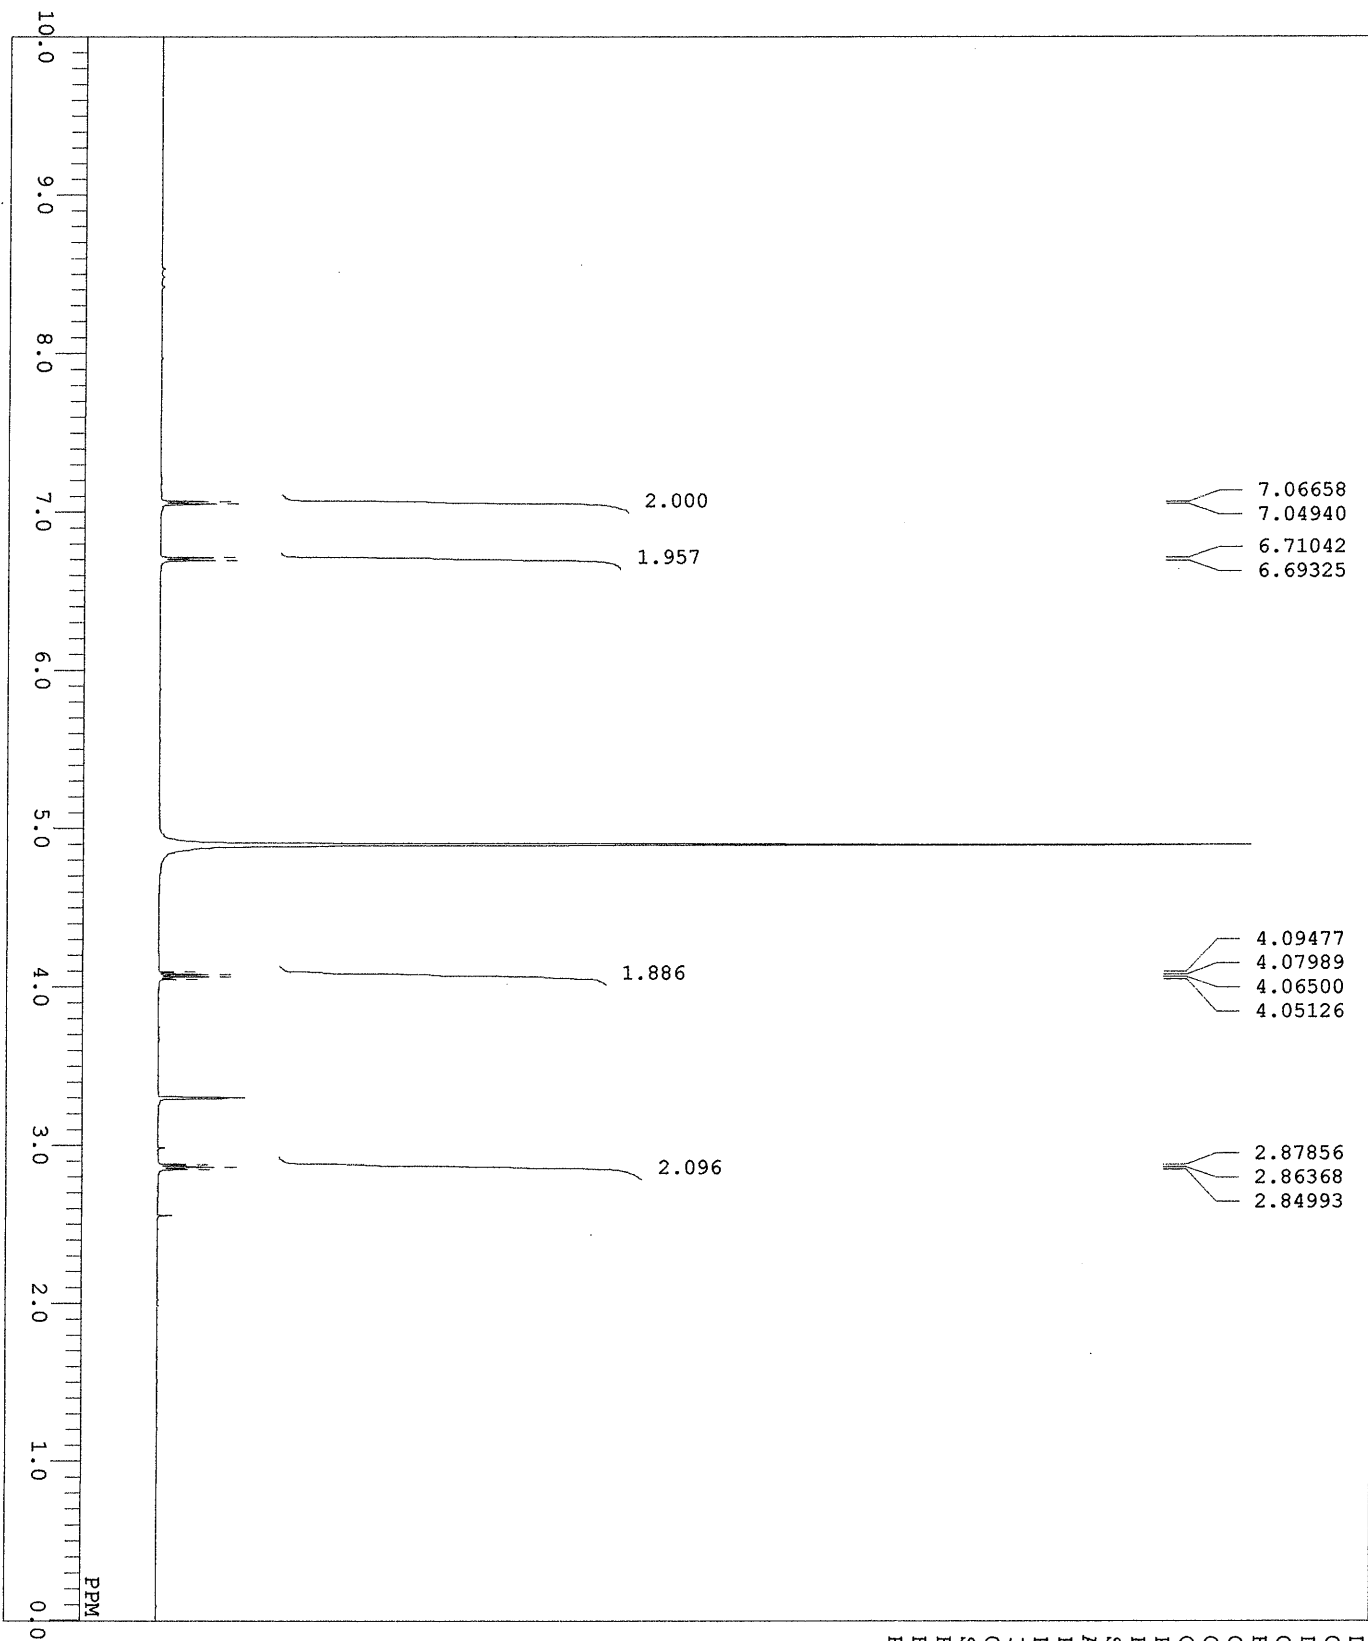

DFILE 18kd3118HPLCI-1-1.ais  
 COMMENT 2018-09-20 01:22:19  
 DATIM 1H  
 OBNUC proton.jxp  
 EXMOD 500.16 MHz  
 OBFRO 2.41 KHz  
 OBSET 6.01 Hz  
 OBFIN 13107  
 POINT 7507.51 Hz  
 FREQU 7  
 SCANS 1.7459 sec  
 ACQTM 5.0000 sec  
 PD 5.55 usec  
 PW1 1H  
 IRNUC 21.5 c  
 CTEMP CD3OD  
 SLYNT 3.30 ppm  
 EXREF 0.12 Hz  
 BF 30  
 RGAIN

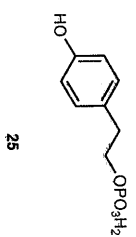

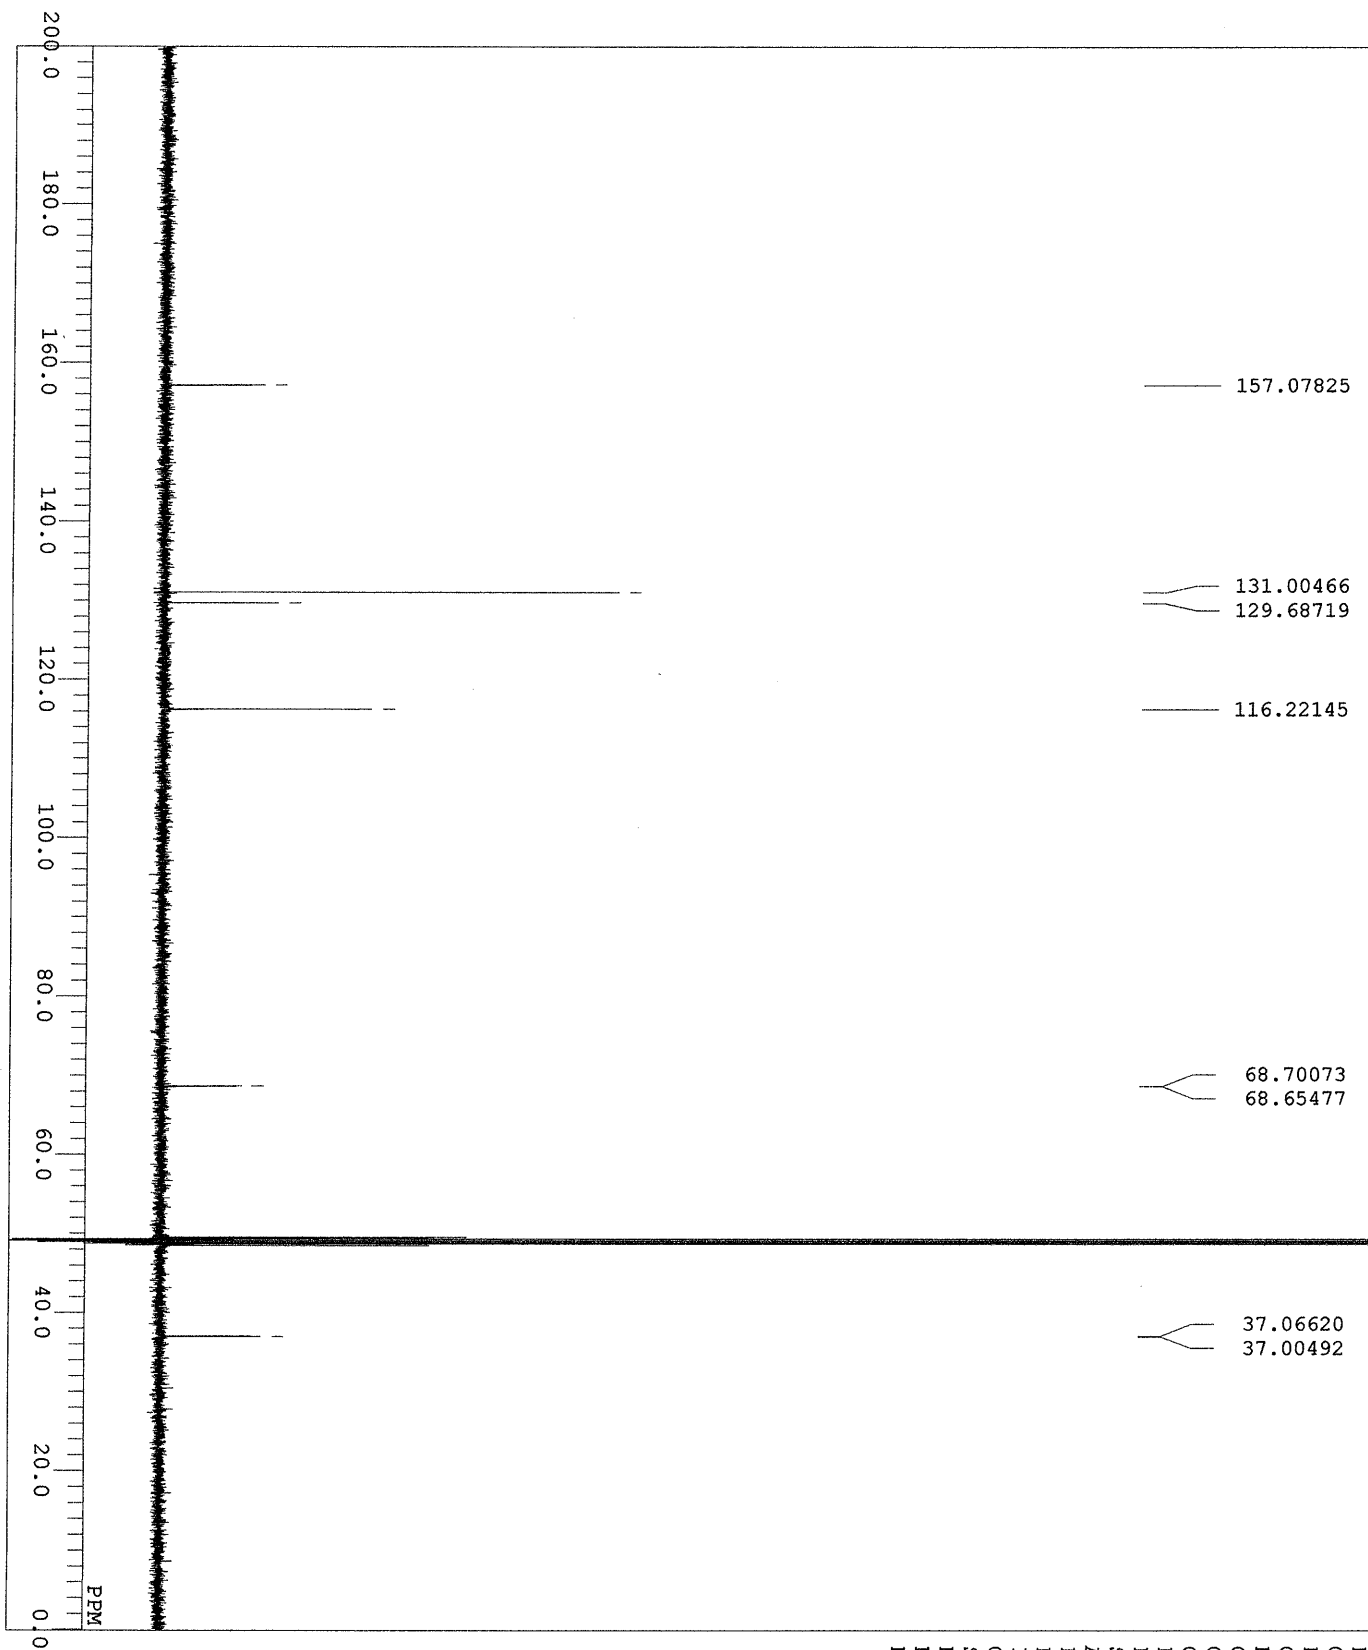

DFILE 18kd3118HPLC1\_carbon-1-1.a1s  
 COMNT  
 DATIM 2018-09-20 02:53:15  
 OBNUC 13C  
 EXMOD carbon.jxp  
 OBFRO 125.77 MHz  
 OBSET 1.58 KHz  
 OBFIN 5.95 Hz  
 POINT 26214  
 FREQU 50505.05 Hz  
 SCANS 1952  
 ACQTM 0.5190 sec  
 PD 2.0000 sec  
 PM1 3.40 usec  
 IRNUC 1H  
 CTEMP 22.2 C  
 SLVNT CD3OD  
 EXREF 49.00 ppm  
 BF 0.12 Hz  
 RGAIN 60

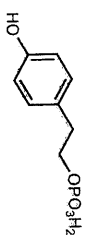

25



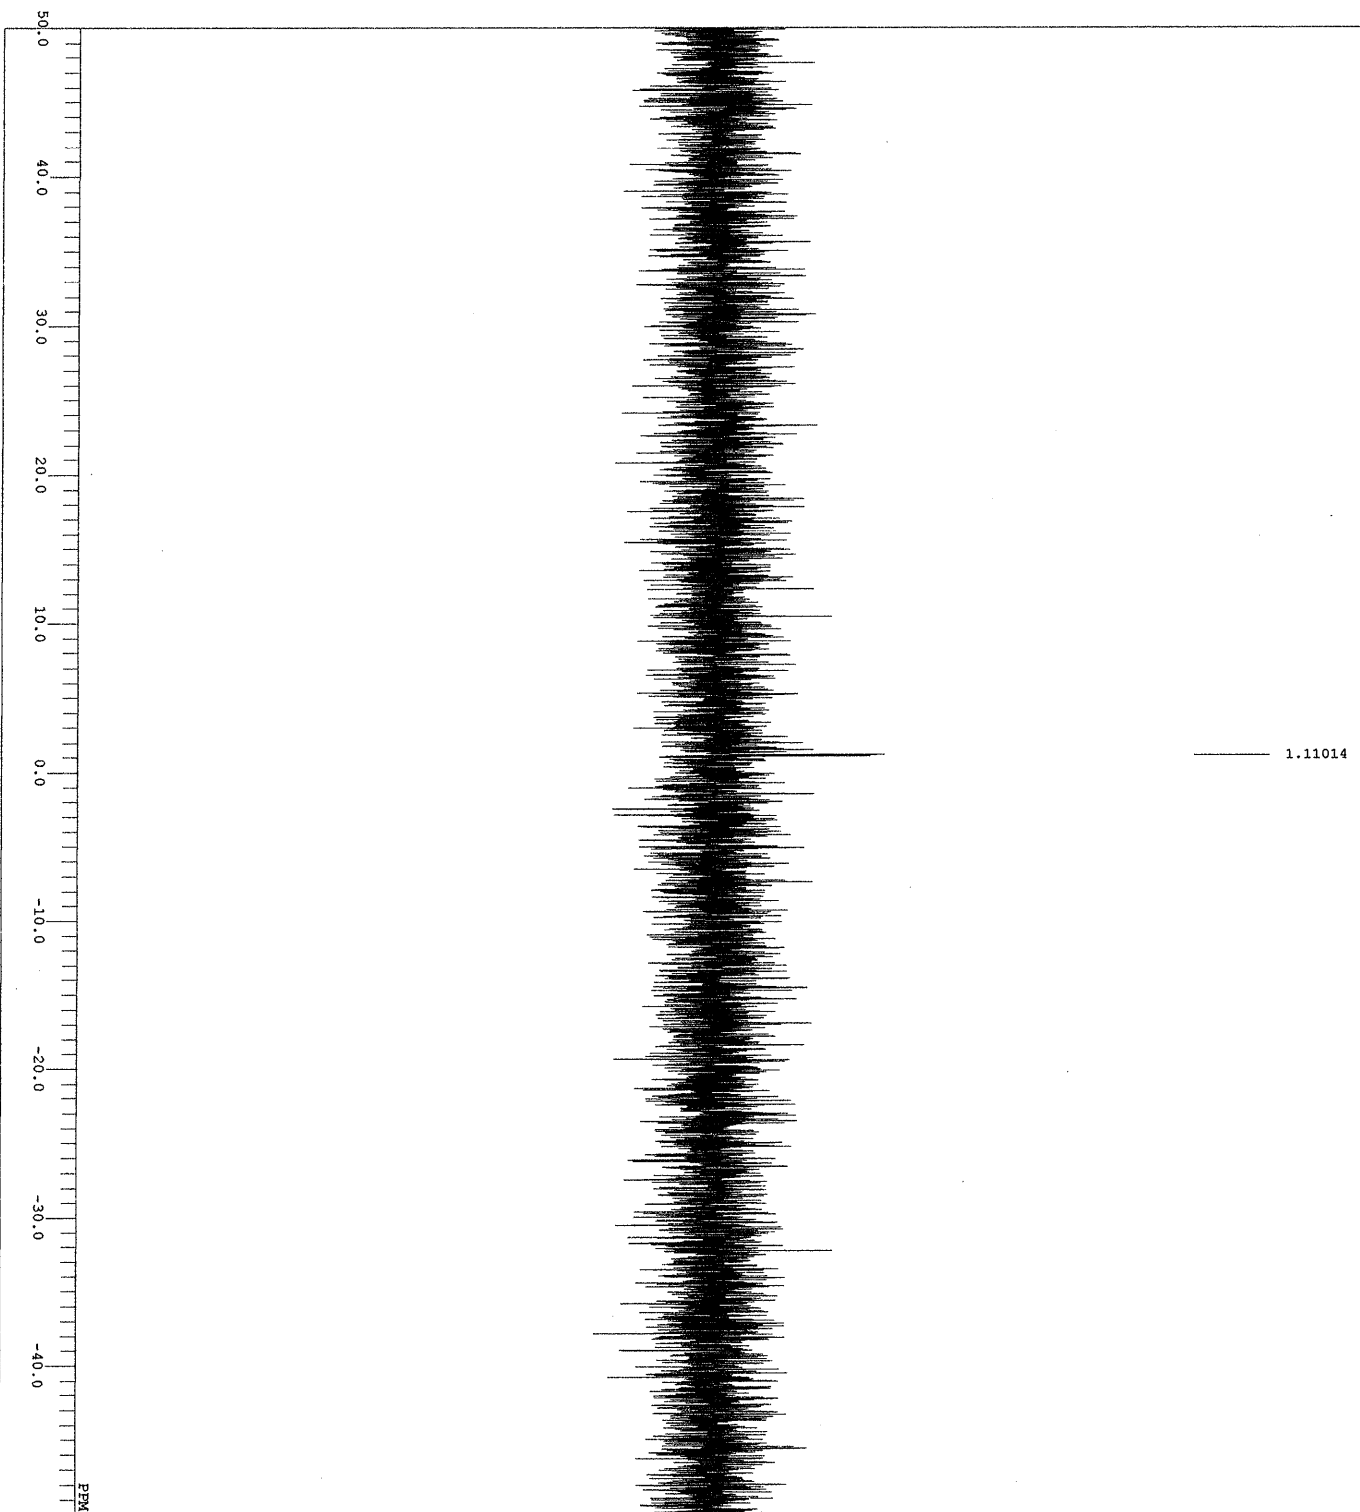

DEFILE 18k3118tm\_P-1-1.als  
 COMMENT 07-03-2019 05:05:07  
 DATUM 31P  
 ERFKOD carbon-13P  
 OBSERVO 158.59 MHz  
 OBSERT 7.99 KHz  
 OBSFIN 9.23 Hz  
 POINT 26214  
 FREQOU 64102.56 Hz  
 SCANS 28  
 ACQTM 0.4089 sec  
 PD 2.0000 sec  
 PUL 4.80 usec  
 PM1 1H  
 IRNUC 20.0 c  
 CTEMP CD3OD  
 SLYMT 0.00 ppm  
 EXREF BF 0.12 Hz  
 RGAIN 56

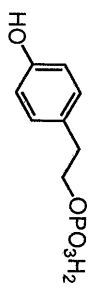

25

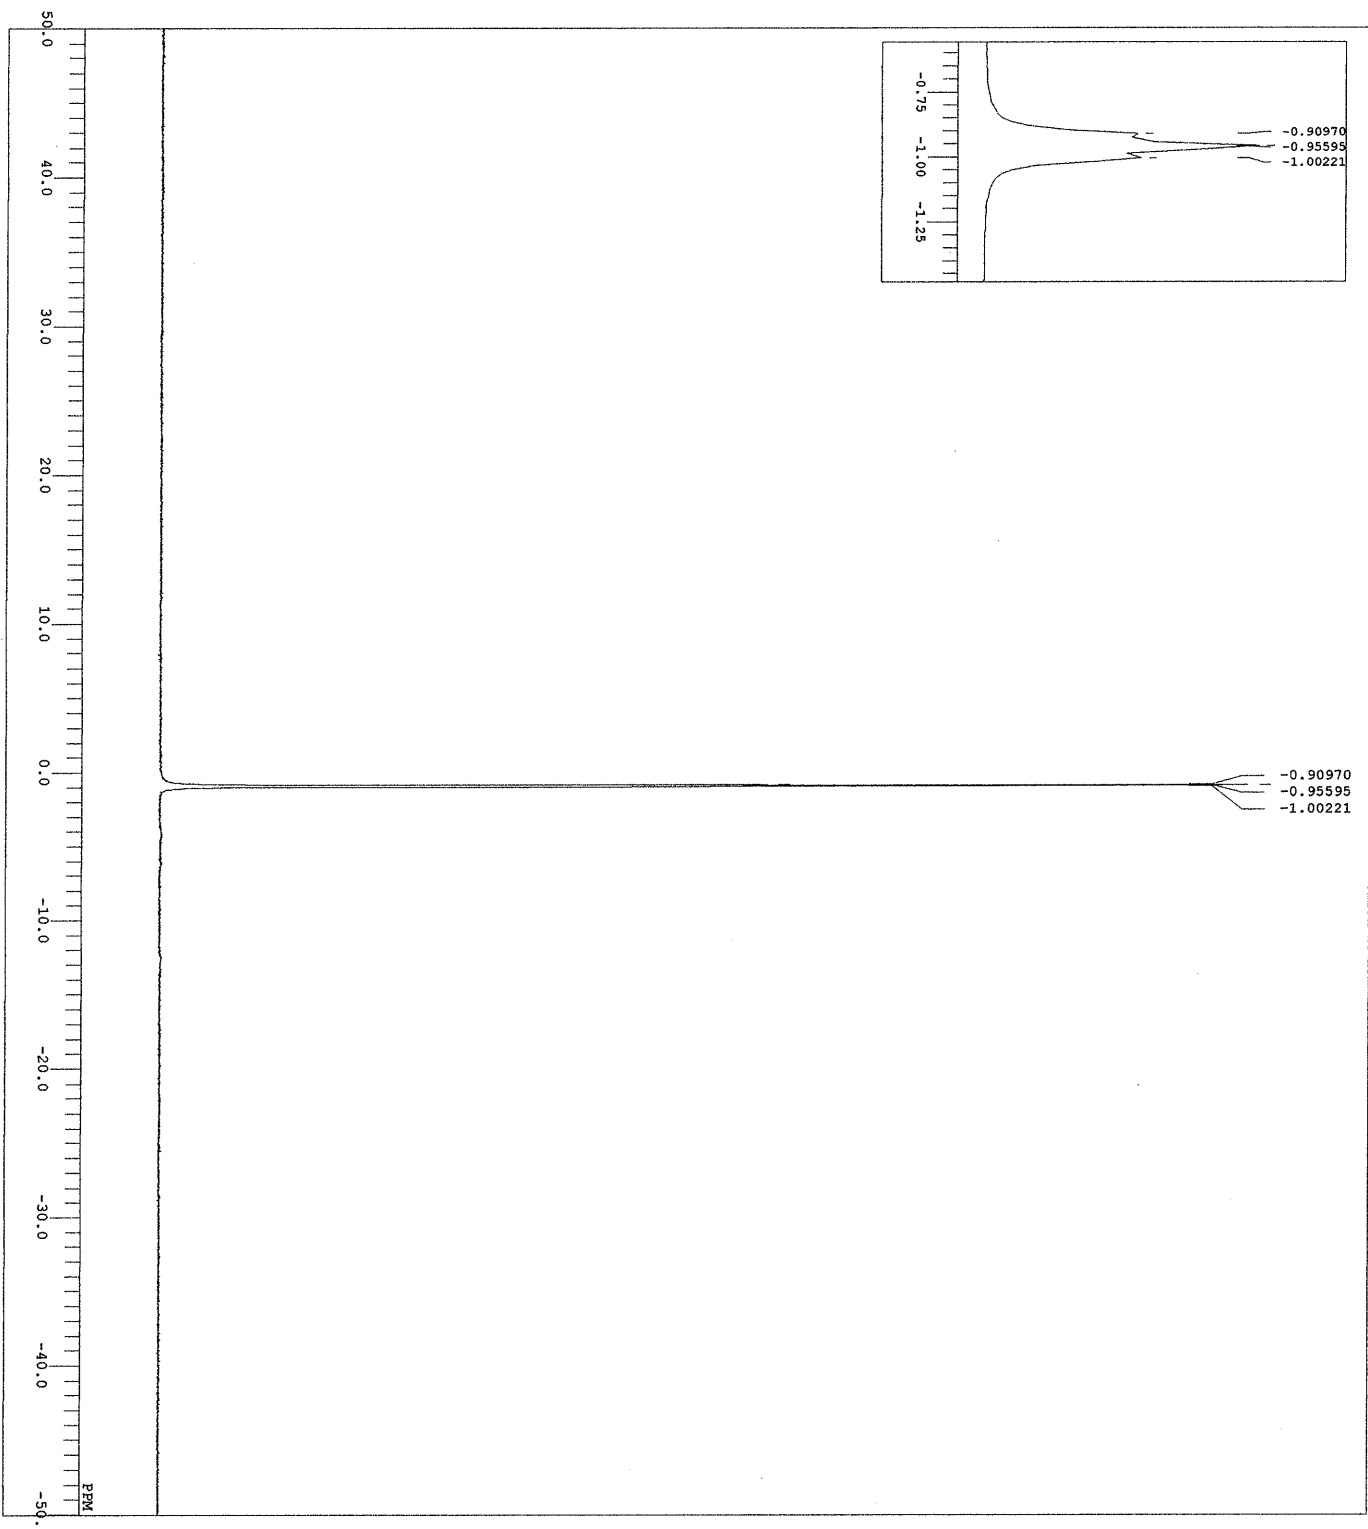

TITLE KF-0001-PPe-H-coupled-P-o-n\_copy1-1-1.als  
 COMMENT  
 DATE 01-10-2019 22:31:52  
 ORNUC 31P  
 ERMOD single\_pulse.jxp  
 OSFRQ 158.59 MHz  
 OBSER 7.99 KHz  
 OBFIN 9.23 Hz  
 POINT 25214  
 FREQ 64102.56 Hz  
 SCANS 15883  
 ACOU 0.0000 sec  
 PD 2.0000 sec  
 PULPROG zgpg30  
 PRG 4.80 usec  
 INTC 31P 20.6 c  
 CHAN DMSO  
 SLOPE 0.00 ppm  
 EXREF 0.12 Hz  
 BR 36  
 KSHLN

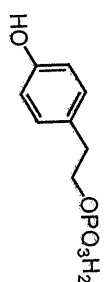

25  
<sup>1</sup>H coupled <sup>31</sup>P NMR

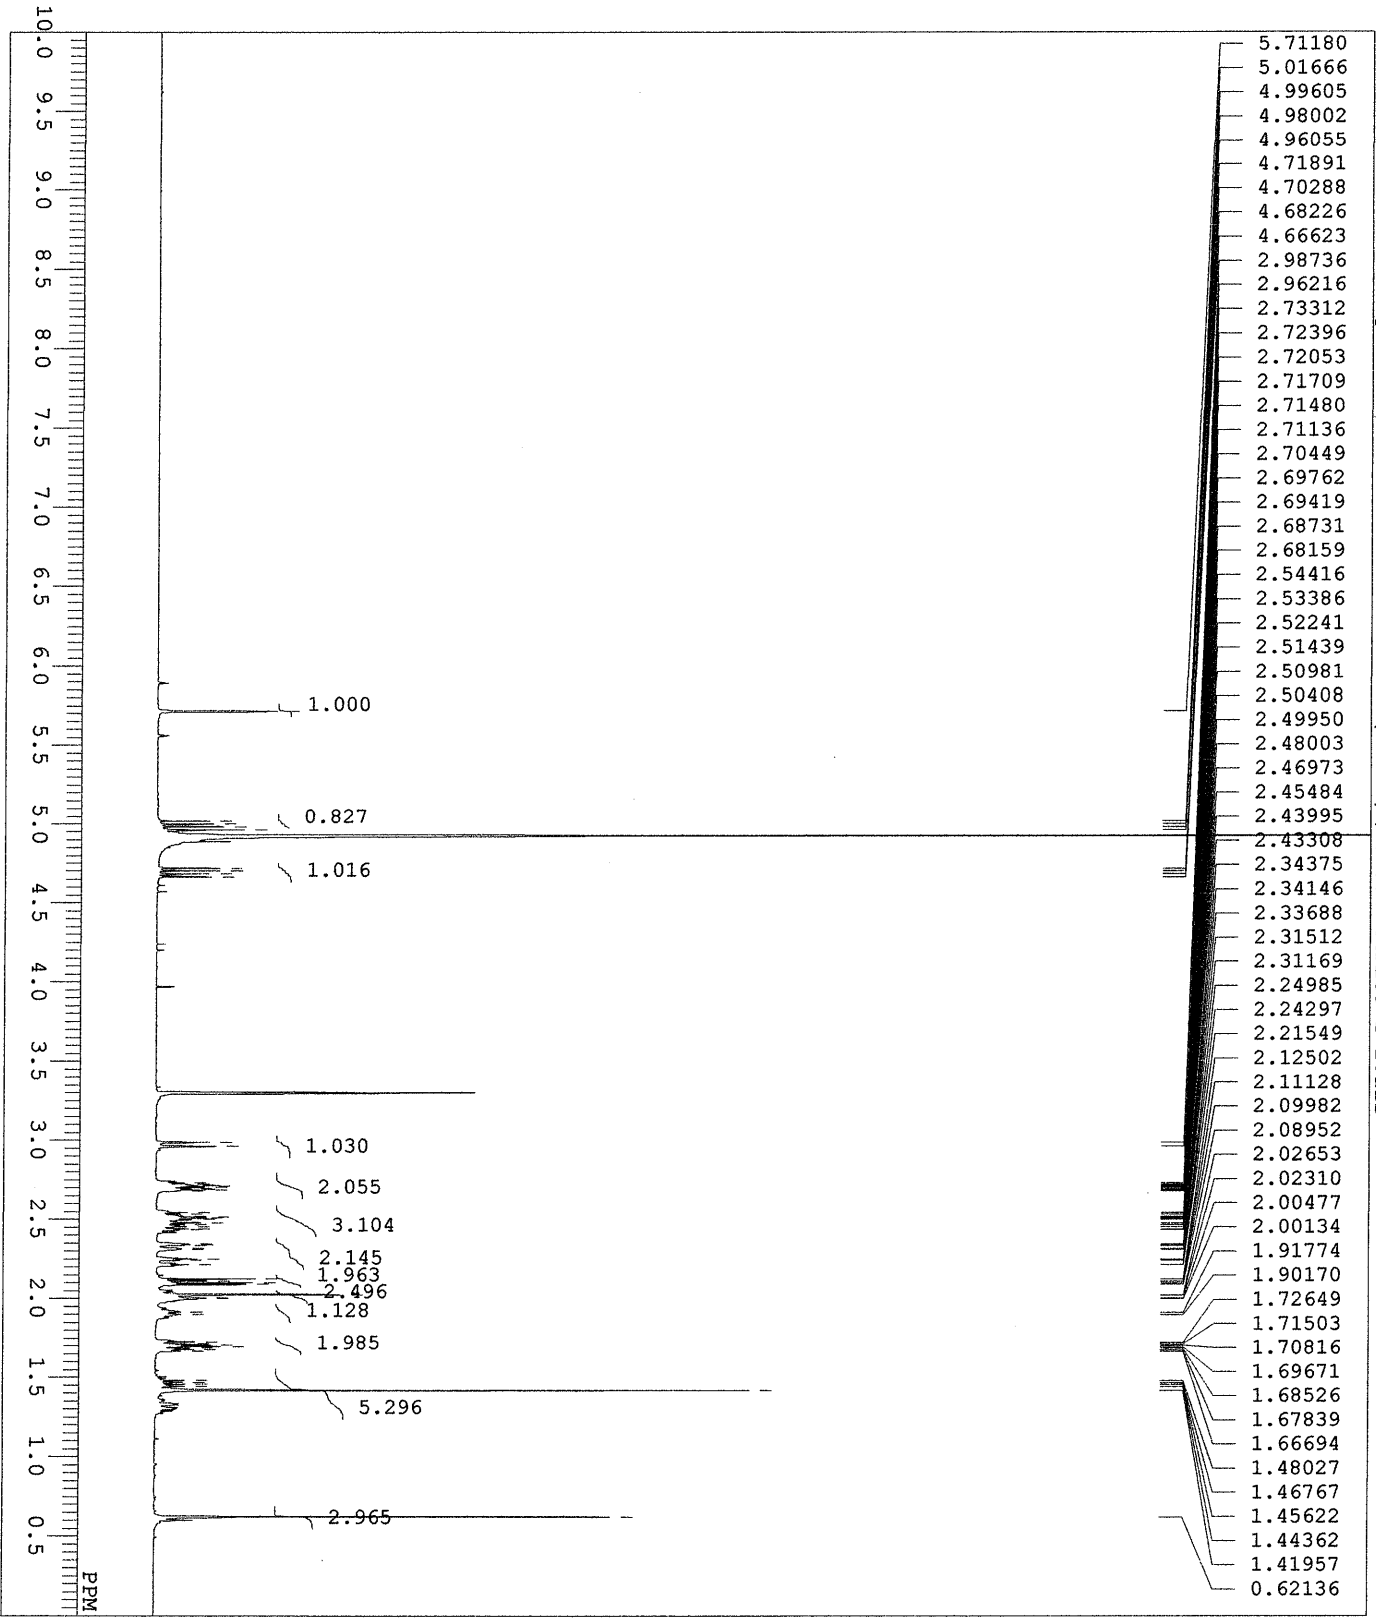

DFIL 18kd3171HPLC5-1-1.a1s  
 COMNT 2018-09-30 20:24:17  
 DATIM 1H  
 OBNUC 1H  
 EXMOD proton.jxp  
 OBFRO 500.16 MHz  
 OBFIN 2.41 KHz  
 POINT 6.01 Hz  
 FREOU 13107  
 SCANS 7507.51 Hz  
 ACQTM 8  
 PD 1.7459 sec  
 PM1 5.0000 sec  
 IRNUC 5.55 usec  
 CTEMP 1H  
 SLVNT CD3OD 21.7 C  
 EXREF 3.30 ppm  
 BF 0.12 Hz  
 RGAIN 30

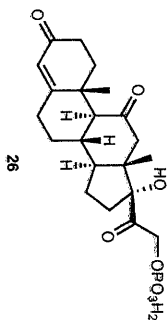

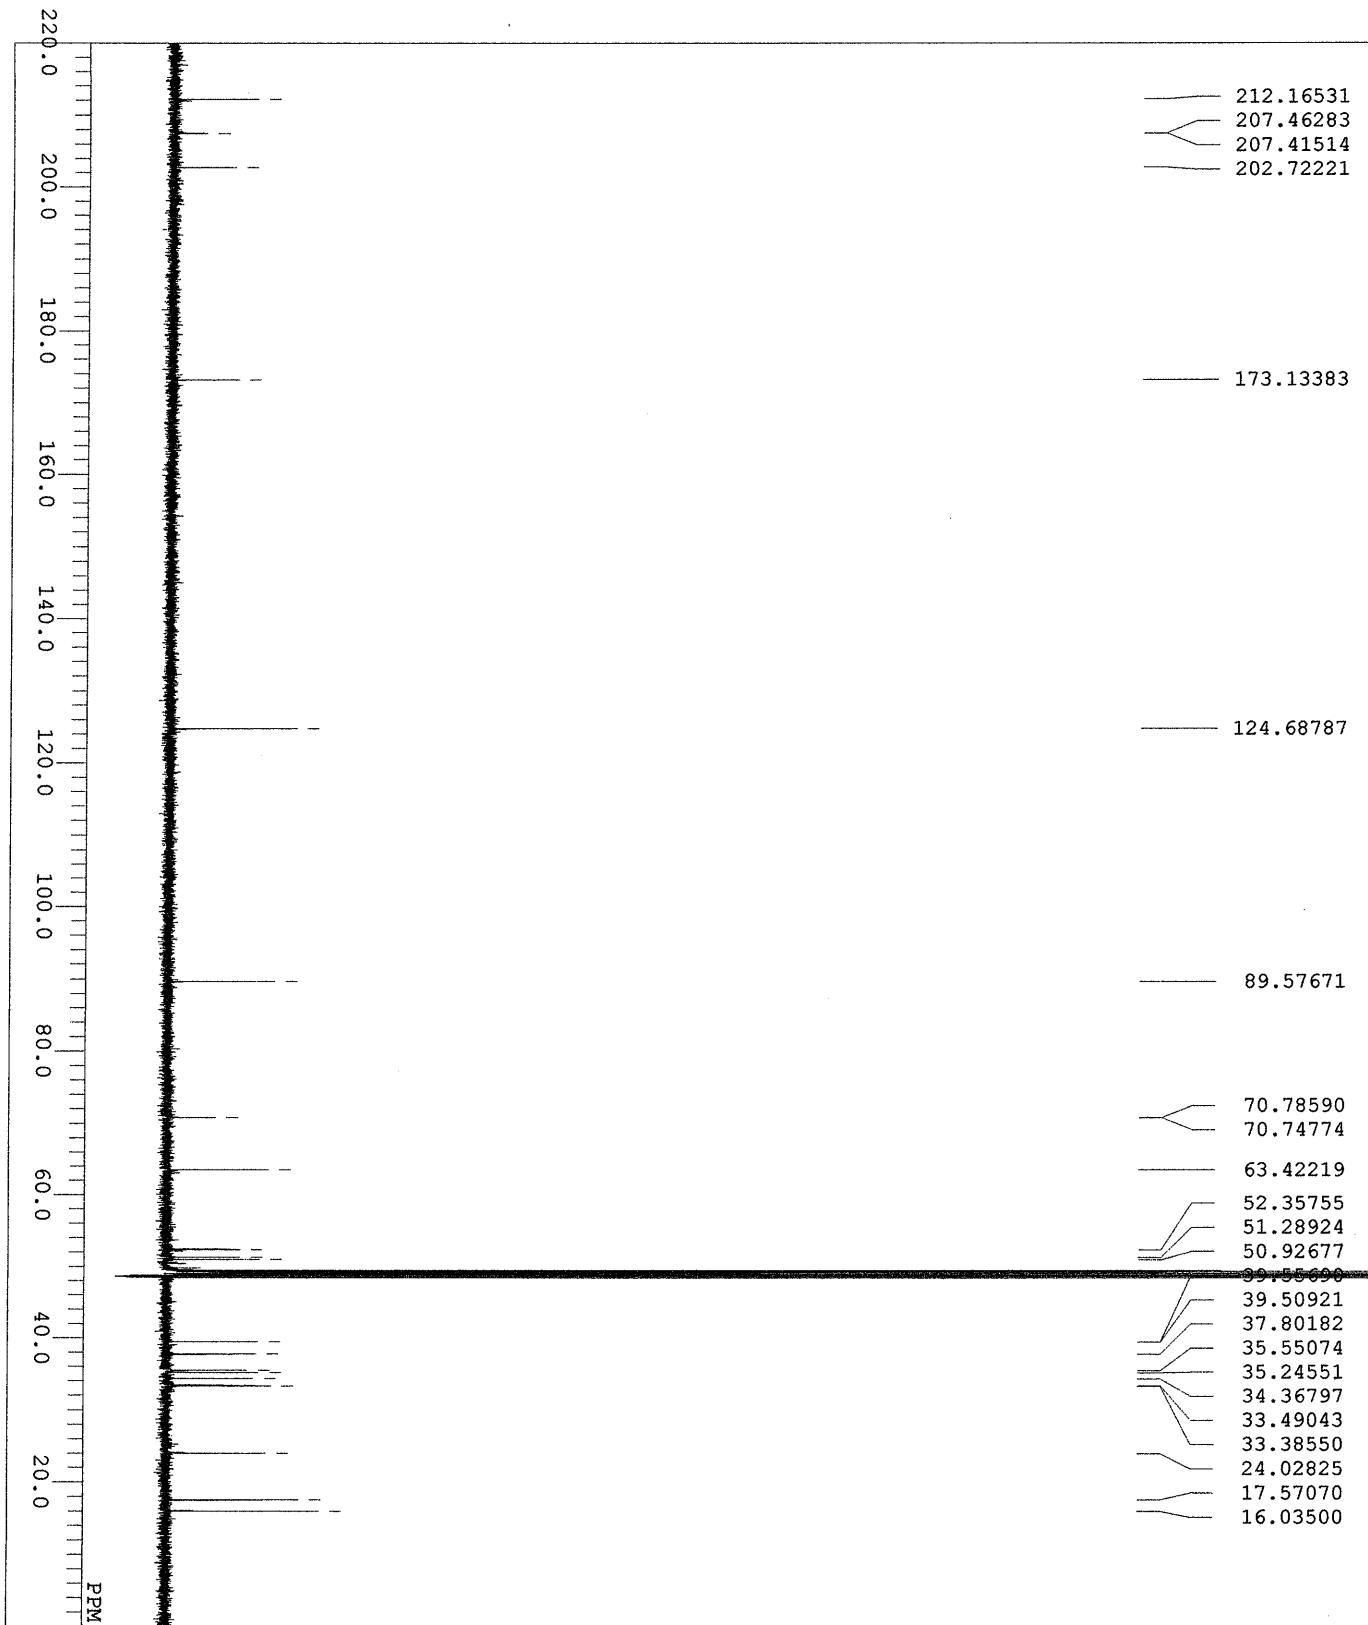

DFILE 18kd3422tm\_carbon-1-1.als  
 COMMENT 2019-03-20 01:07:39  
 DATIM 13C  
 OBNUC carbon.jxp  
 EXMOD 125.77 MHz  
 OBFRO 7.87 KHz  
 OBSET 4.21 Hz  
 OBFIN 26214  
 POINT 31446.54 Hz  
 FREQU 9877  
 SCANS 0.8336 sec  
 ACQTM 2.0000 sec  
 PD 3.40 usec  
 PW1 21.9 c  
 IRNUC CD3OD  
 CTEMP 49.00 ppm  
 SIVNT EXREF 0.12 Hz  
 BF 60  
 RGAIN

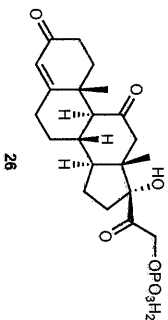



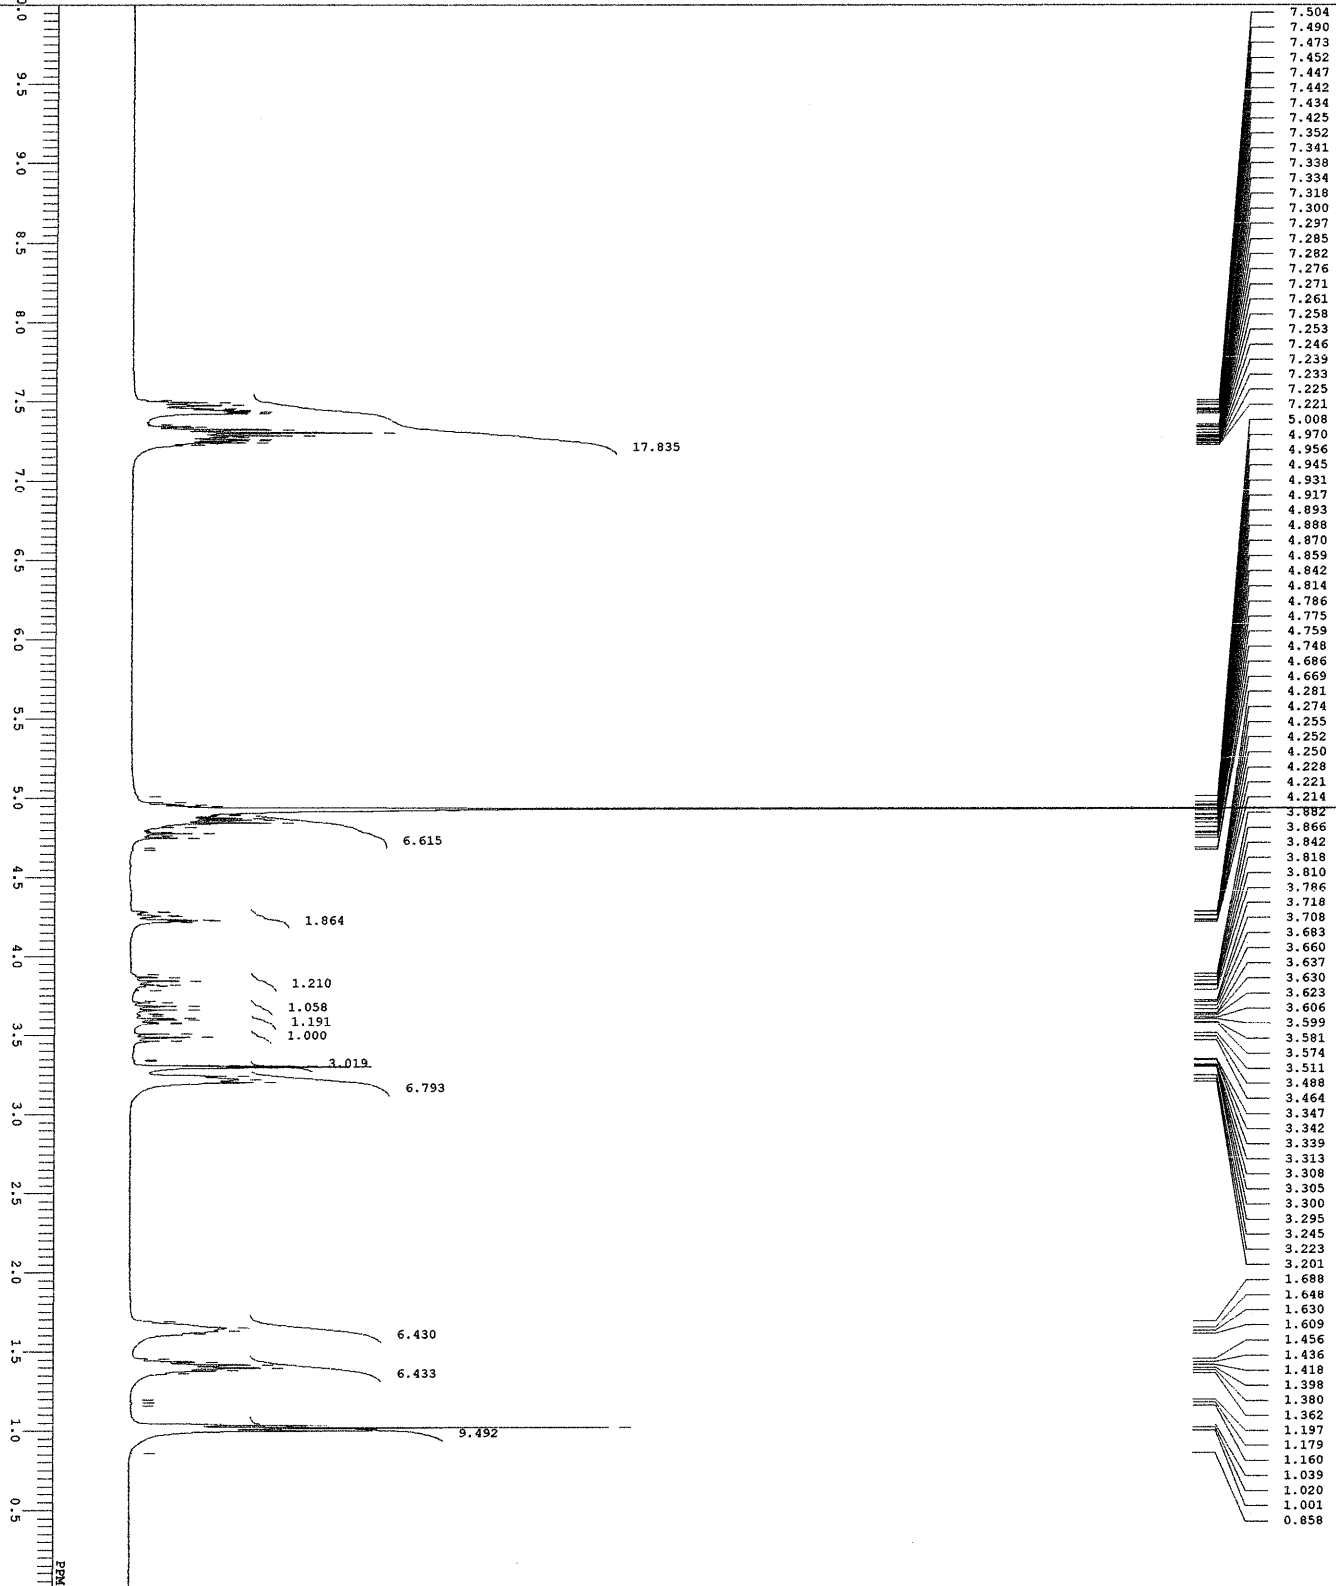

```

PR1E 18k3447HPC3-1-1.a1s
COM1 05-03-2019 03:23:52
DATE
IN
EXMOD proton_jmp
OBSFQ 391.78 MHz
OBSRT 8.51 KHz
POINT 13107
PREQV 5882.35 Hz
SCANS 8
ACQTM 2.2282 sec
FD 5.0000 sec
F1 5.42 usec
INVC 19.7 c
SINE CD30D 3.30 ppm
REF 0.12 Hz
RGAIN 32
    
```

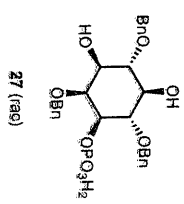

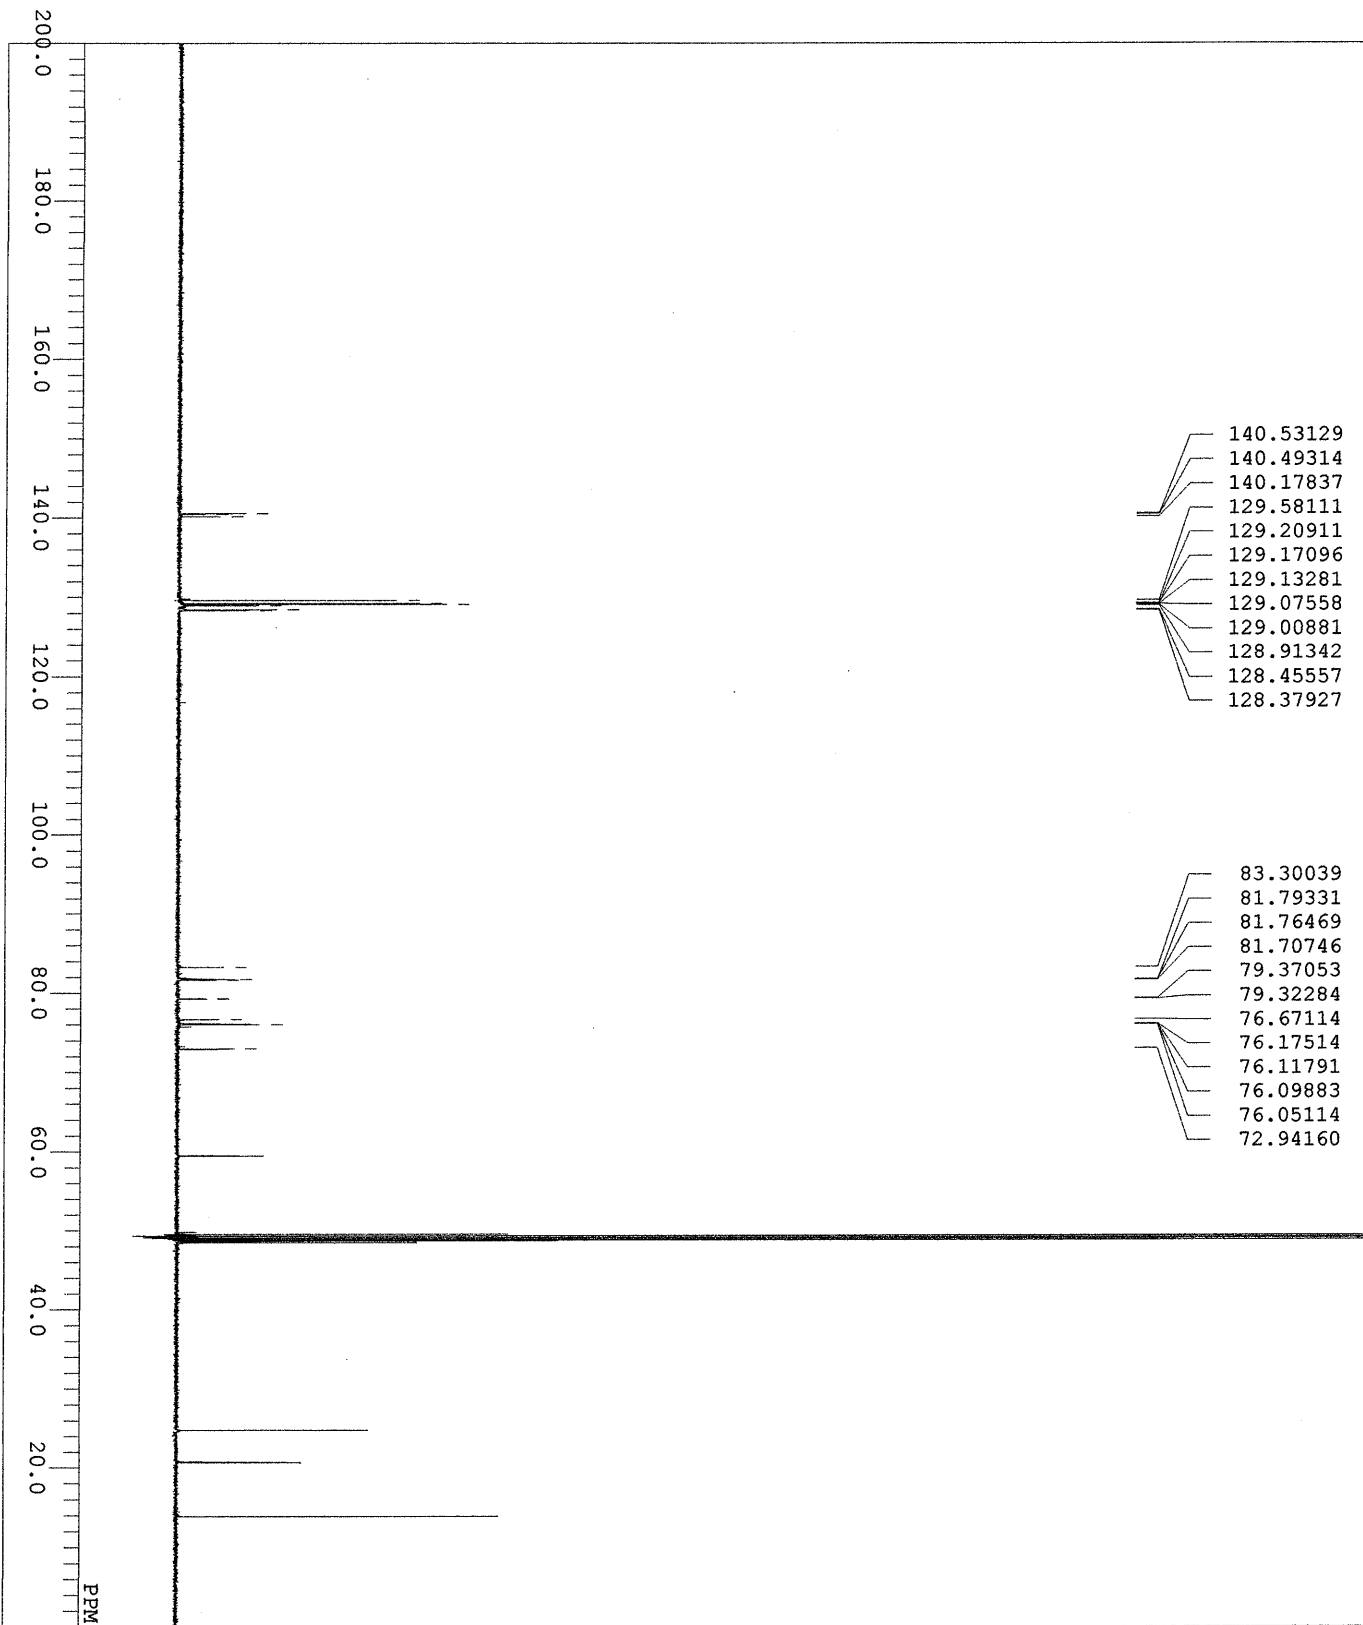

DEFILE 18kd3447HPLC3\_carbon-1-1.als  
 COMMENT 2019-03-06 03:27:44  
 DATIM 13C  
 OBNUC carbon.jxp  
 EXMOD 125.77 MHz  
 OBFRO 7.87 KHz  
 OBSSET 4.21 Hz  
 OBFIN 26214  
 POINT 31446.54 Hz  
 FREQU 10000  
 SCANS 0.8336 sec  
 ACQTM 2.0000 sec  
 PD 3.40 usec  
 PW1 1H  
 IRNUC 22.1 C  
 CTEMP CD3OD  
 SLVNT 49.00 ppm  
 EXREF BF 0.12 Hz  
 BF 60  
 RGAIN

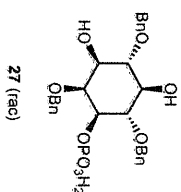

DPFILE 18k3447HPLC3\_P-1-1.als  
 COMMENT  
 DATE 05-03-2019 03:40:21  
 ORBND 31P  
 EXMOD carbon.jxp  
 OBSFRQ 158.59 MHz  
 OBSSET 7.99 KHz  
 OBSFIN 9.23 Hz  
 POINT 26214  
 FREQ 64102.56 Hz  
 SCANS 15  
 ACQTM 0.4089 sec  
 PD 2.0000 sec  
 PUL 4.80 usec  
 IRNTC 1H 20.1 c  
 CHNMP CD3OD  
 SLYMT 0.00 ppm  
 EXREF 0.12 Hz  
 RGAIN 56

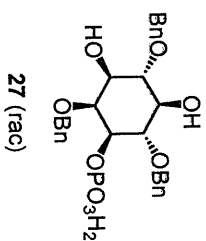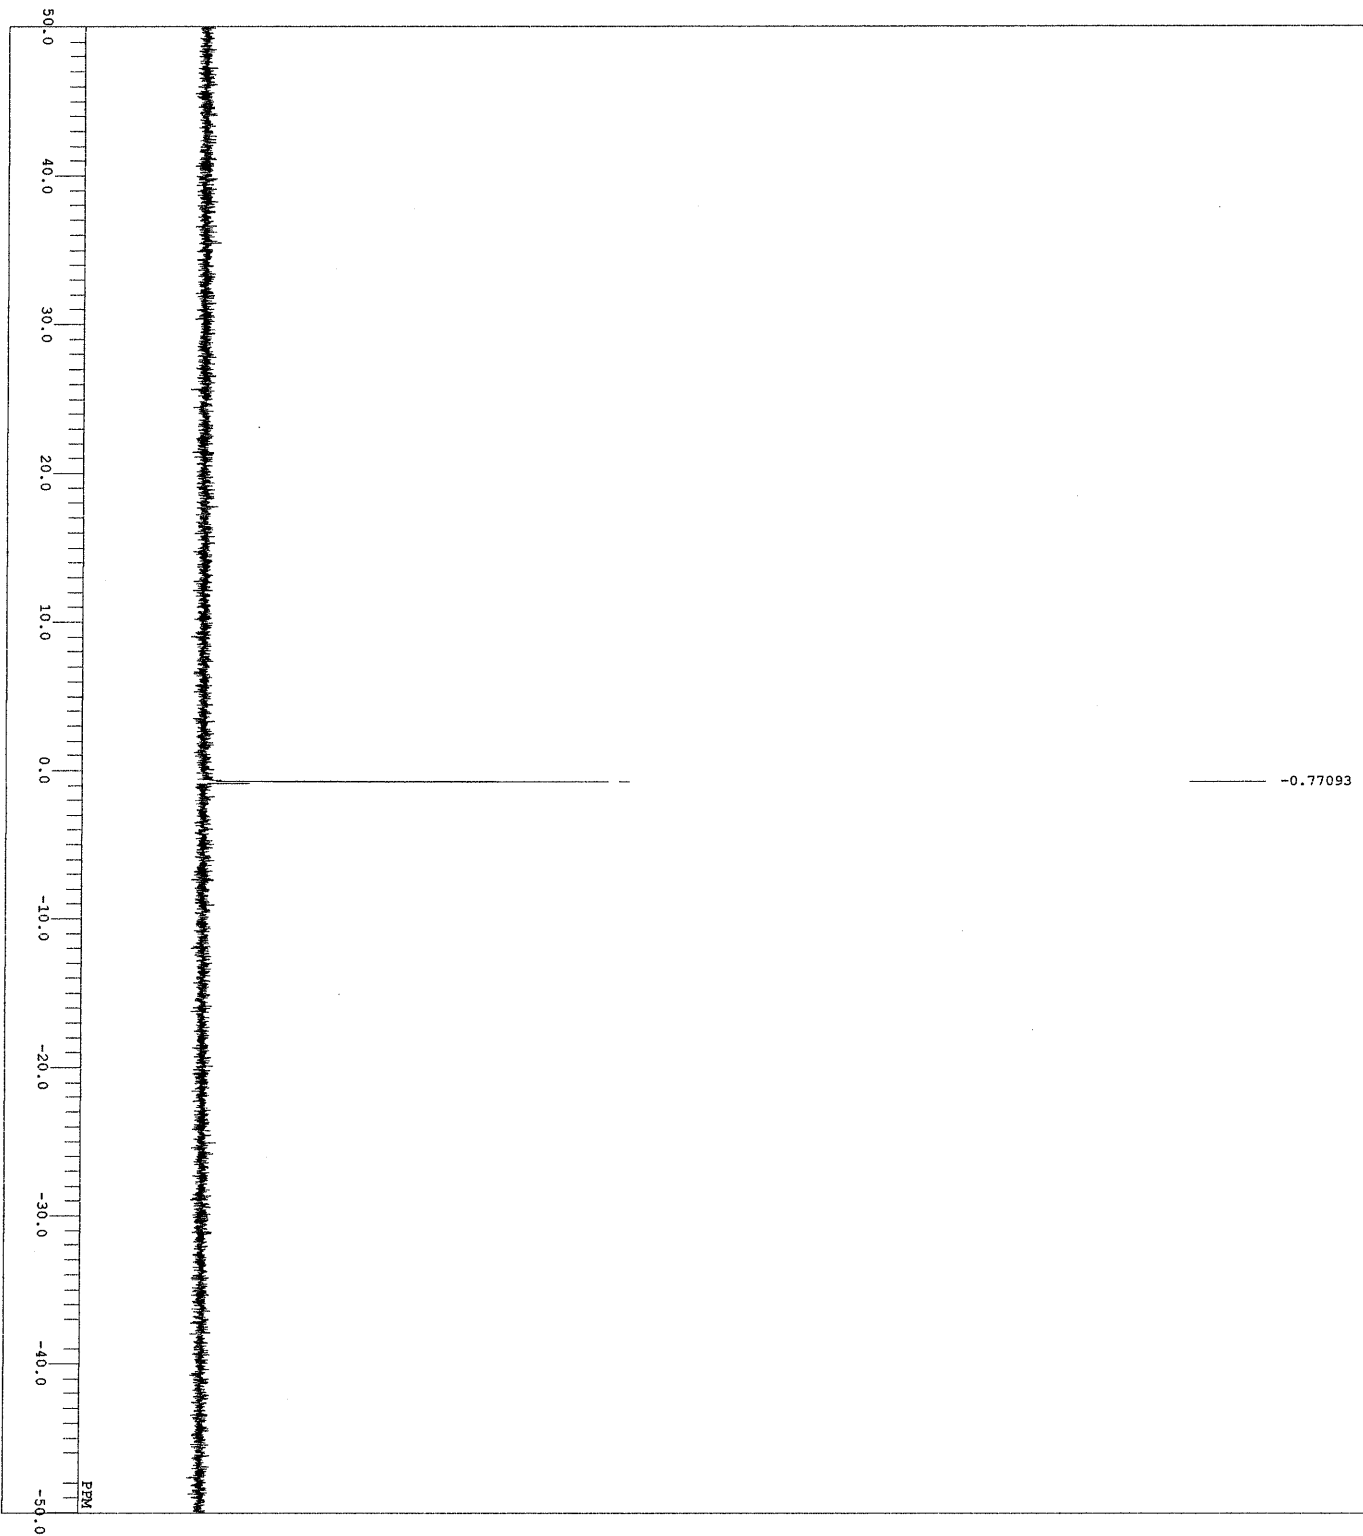



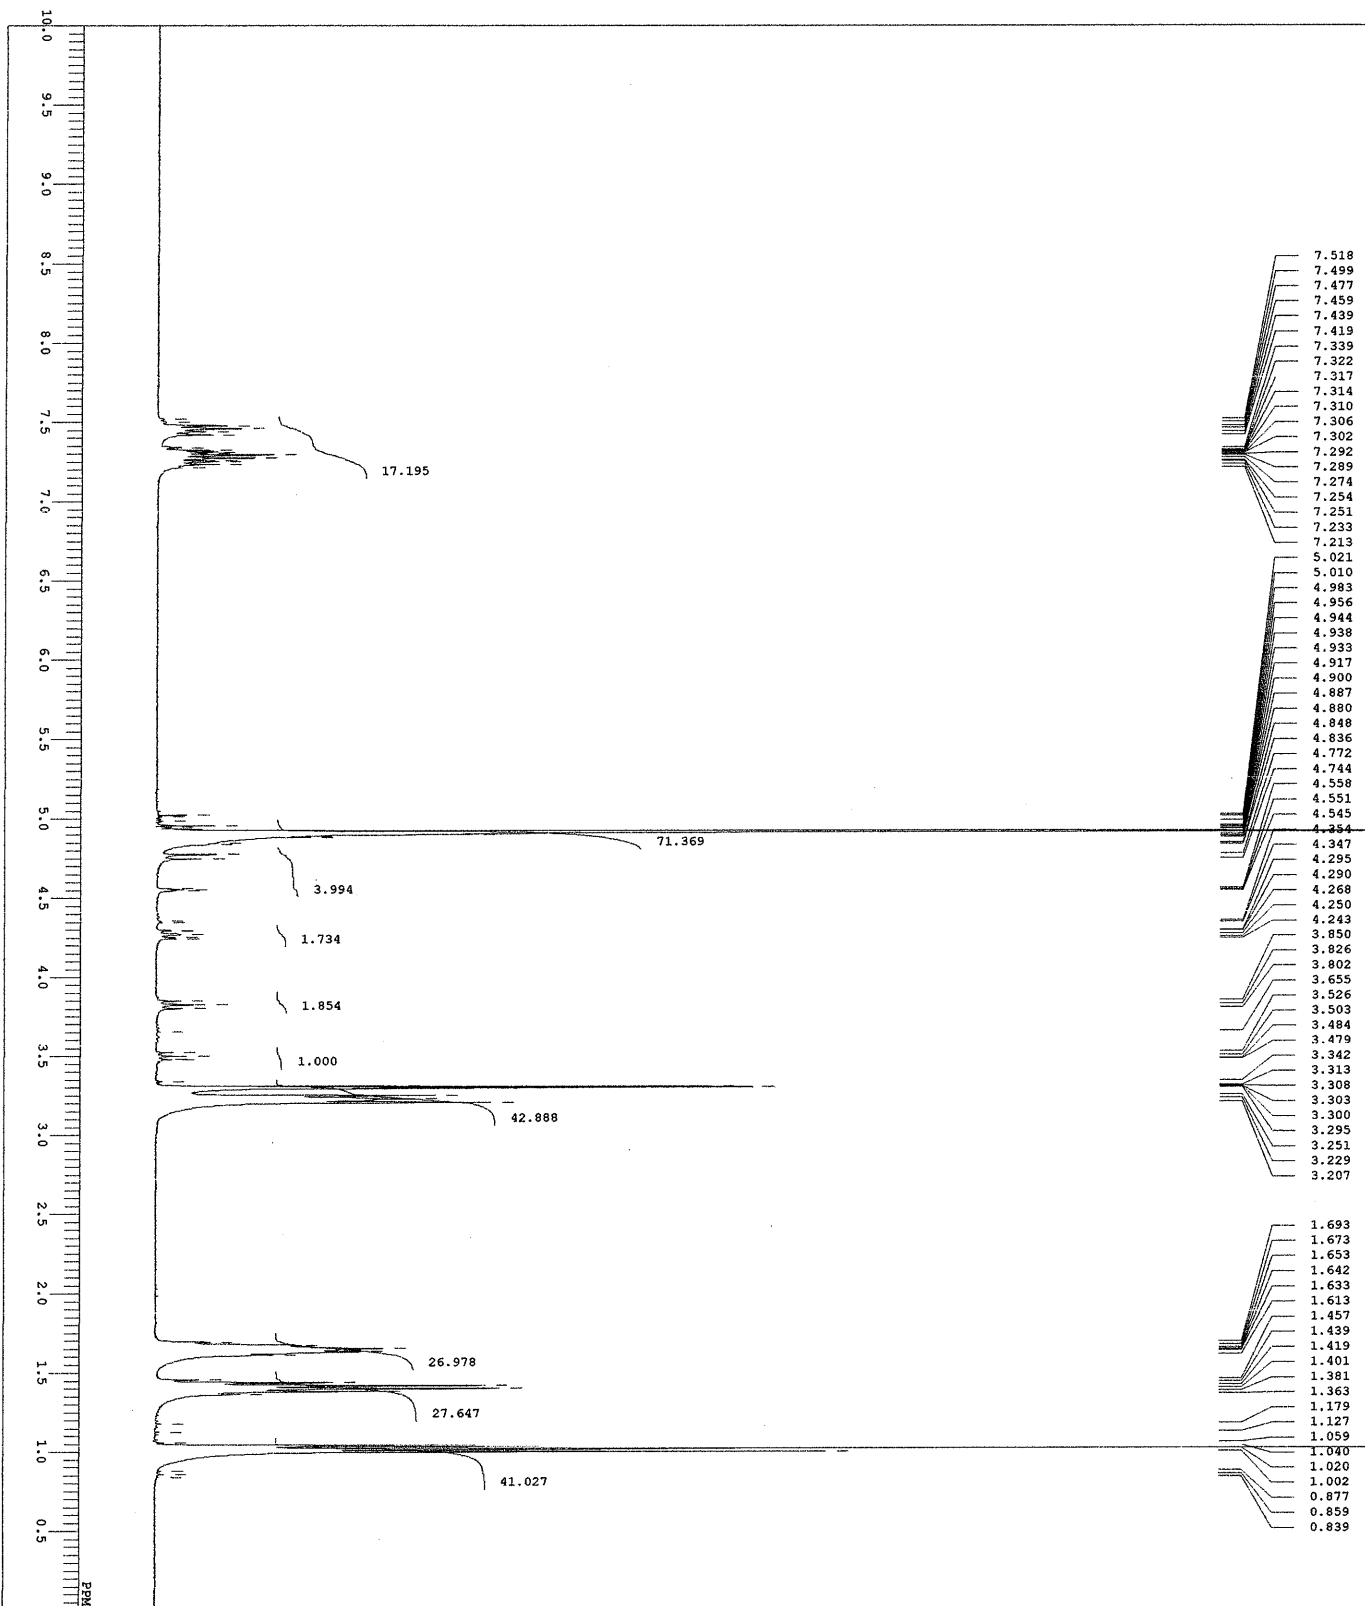

DP1E 18Kd3447HPLC2-1-1.a1s  
 COUNT 05-03-2019 03:30:56  
 DRTM  
 ORNOC 1H  
 EXMOD proton\_jsp  
 OBSFR 391.78 MHz  
 OBSFR 8.51 KHz  
 OBSFR 1.31 KHz  
 PPRND 5882.35 Hz  
 SCANS 5  
 ACQTM 2.2282 sec  
 PD 5.0000 sec  
 PUL 5.22 usec  
 INNOG 1H  
 CTREP 19.7 c  
 SIVMT CD3OD  
 EXREF 3.30 ppm  
 BF 0.12 Hz  
 RGAIN 36

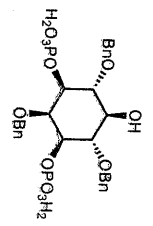

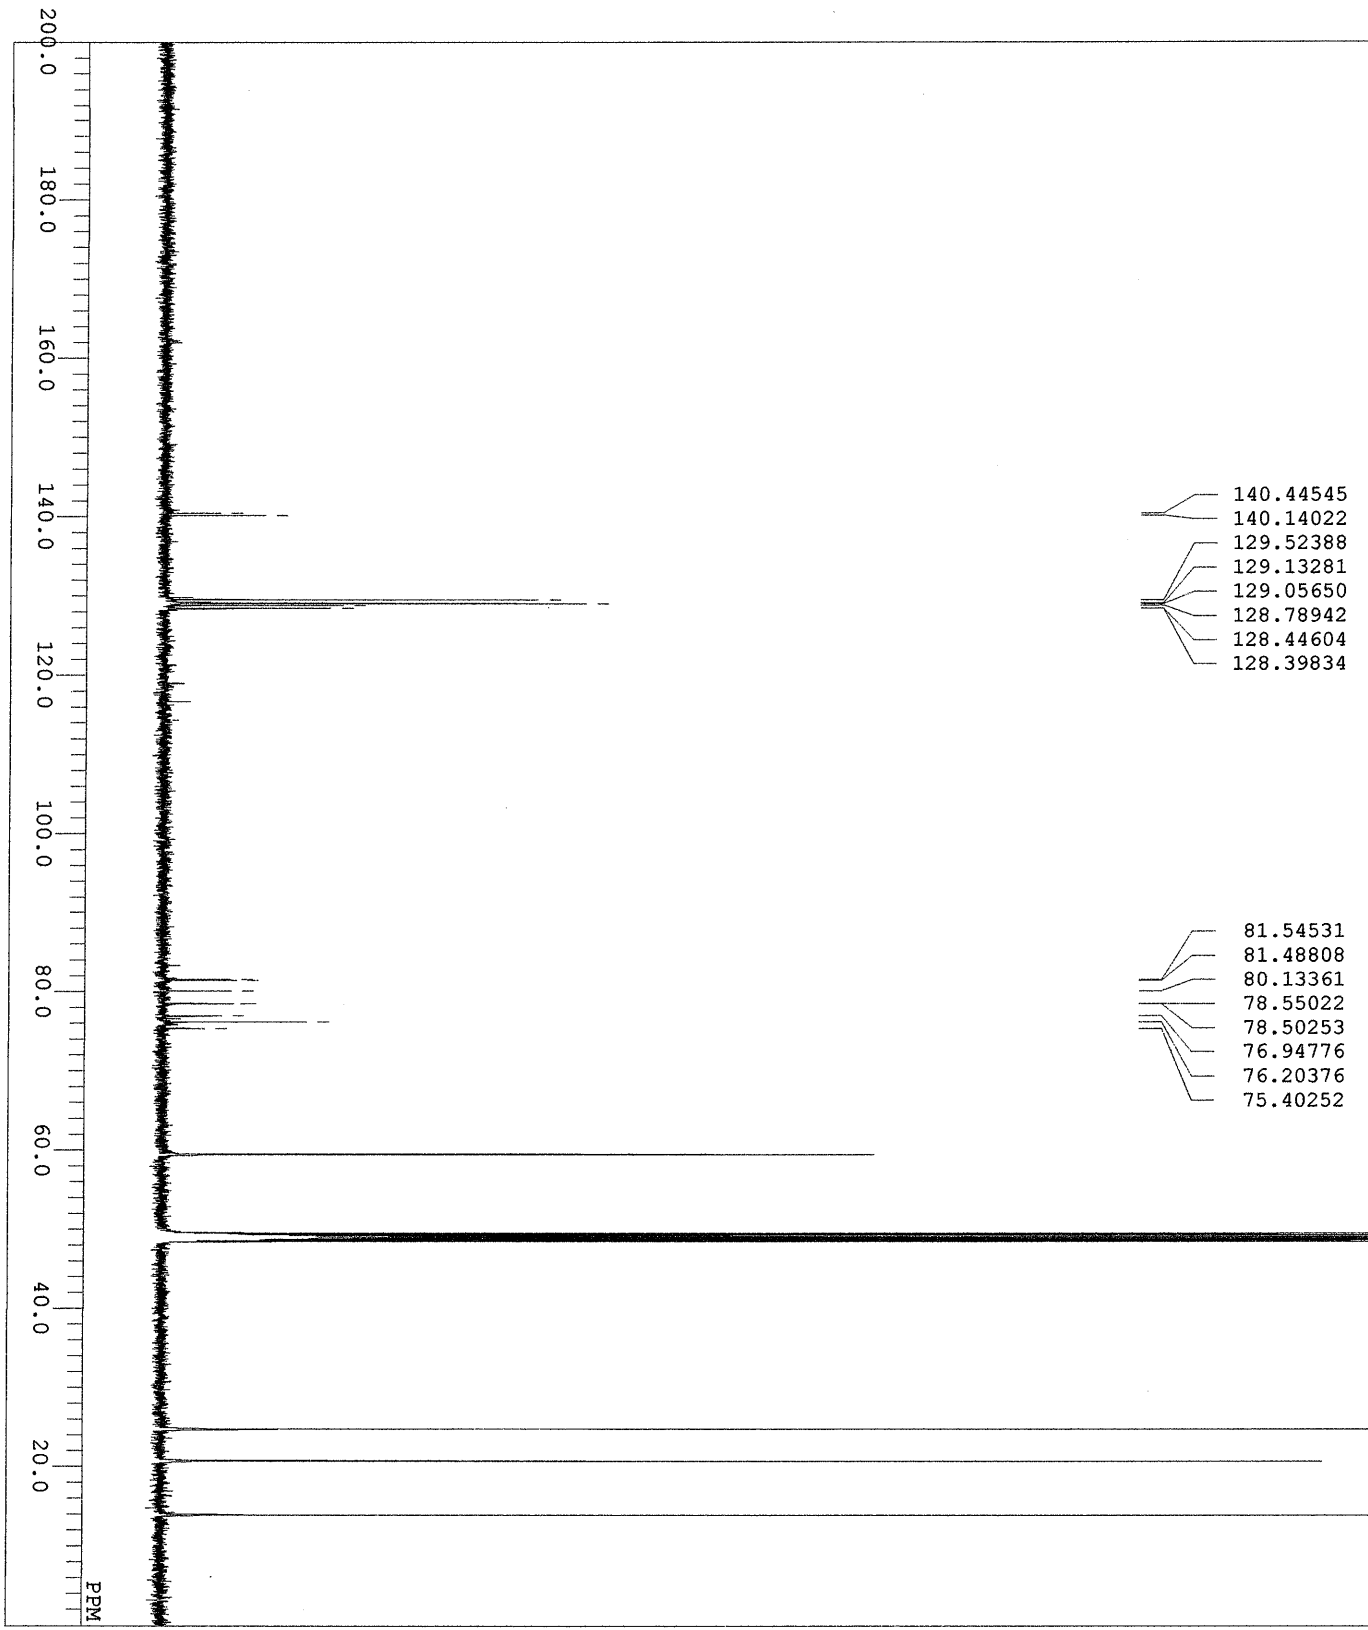

140.44545  
140.14022  
129.52388  
129.13281  
129.05650  
128.78942  
128.44604  
128.39834

81.54531  
81.48808  
80.13361  
78.55022  
78.50253  
76.94776  
76.20376  
75.40252

DFILE 18kd3447HPLC2\_carbon-1-1.a1s  
 COMMENT  
 DATIM 2019-03-16 13:33:22  
 OBNUC 13C  
 EXMOD carbon.jxp  
 OBFRO 125.77 MHz  
 OBSET 7.87 KHz  
 OBFIN 4.21 Hz  
 POINT 26214  
 FREQU 31446.54 Hz  
 SCANS 20000  
 ACQTM 0.8336 sec  
 PD 2.0000 sec  
 PM1 3.40 usec  
 IRNUC 1H  
 CTEMP 21.8 c  
 SLVNT CD3OD  
 EXREF 49.00 ppm  
 BF 1.20 Hz  
 RGAIN 60

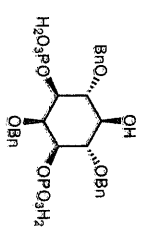

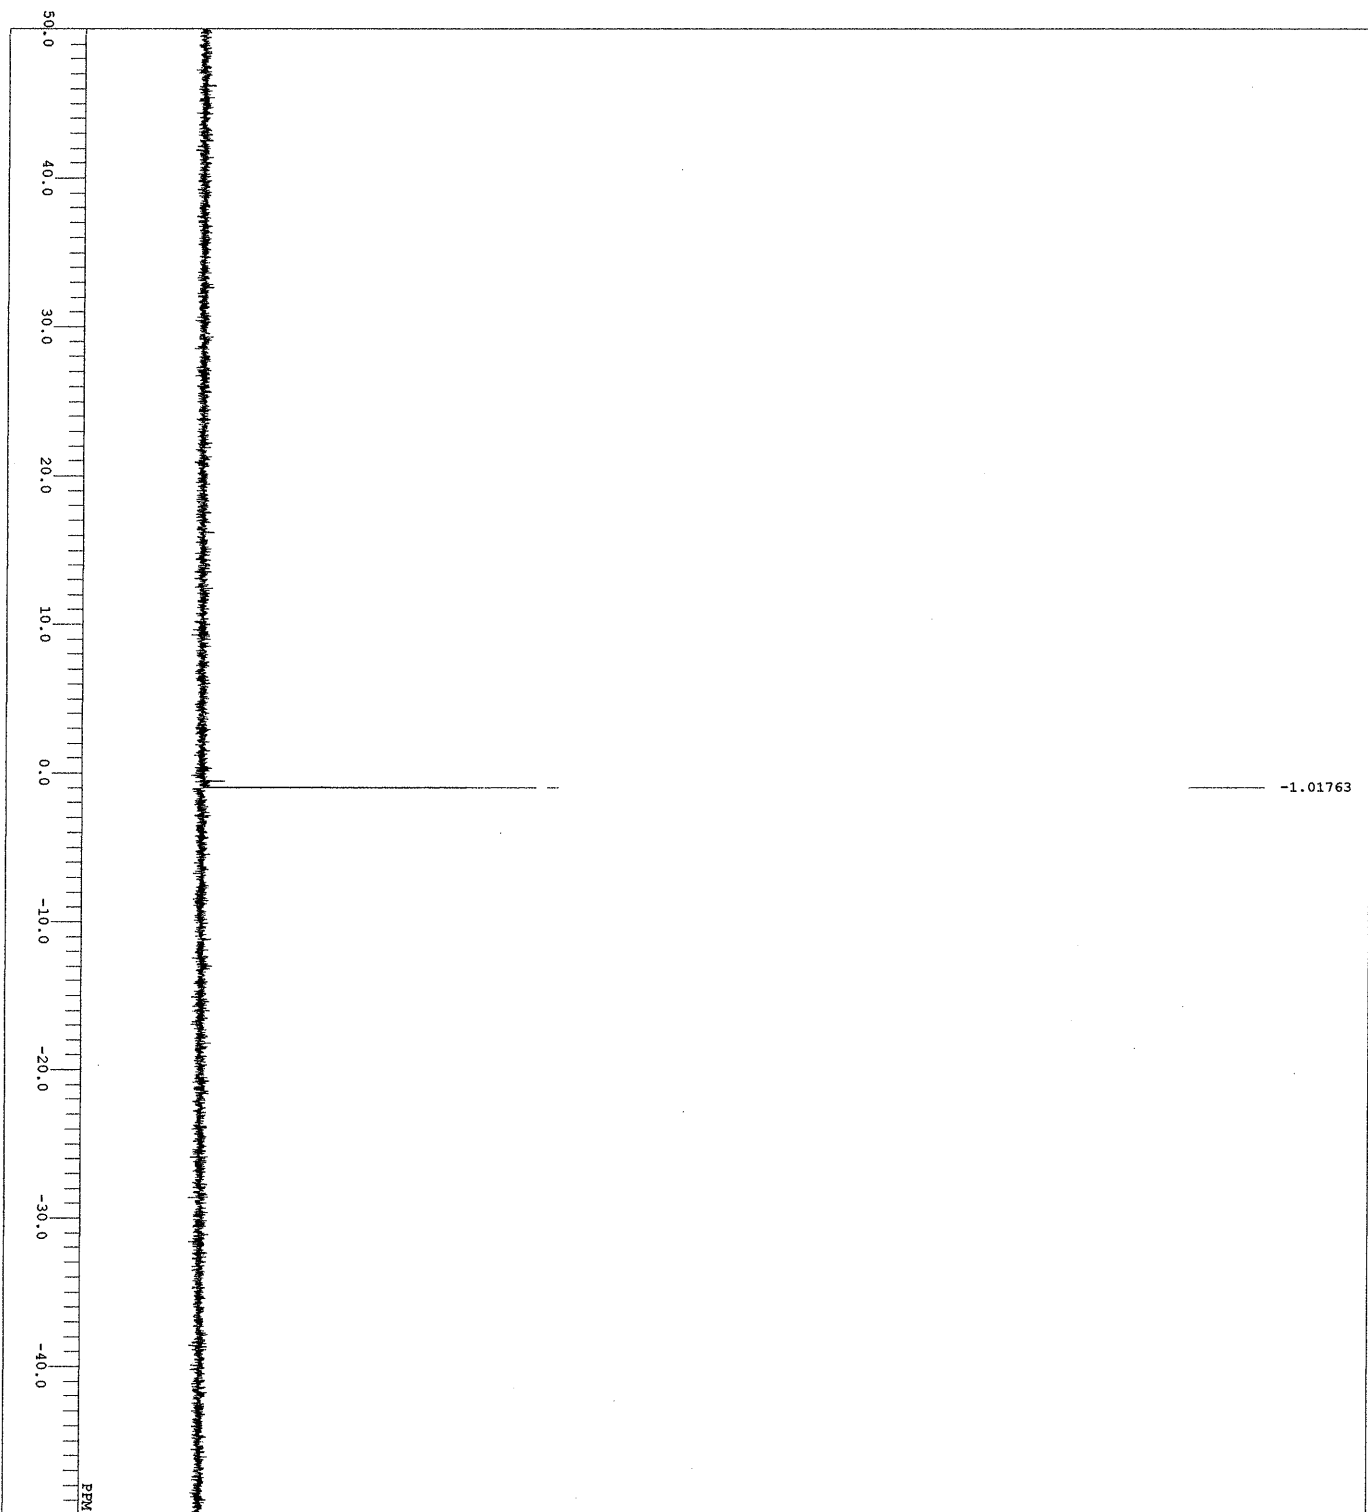

DETLE 18k3447HPLC2\_P-1-1.a1s  
 COMNT 05-03-2019 03:33:58  
 DARTM  
 OBNDC 31P  
 EXXMOD carbon-13p  
 OBFHQ 158.59 MHz  
 OBSER 7.99 KHz  
 OBRIN 9.23 Hz  
 POINT 26214  
 FREOU 64102.56 Hz  
 SCANS 29  
 ACOTM  
 PD 0.4089 sec  
 2.0000 sec  
 PWT 4.80 usec  
 IRRUC 1H 20.1 C  
 CTRAP  
 SLYMT CD3OD  
 EXREF 0.00 ppm  
 BF 0.12 Hz  
 RGAIN 56

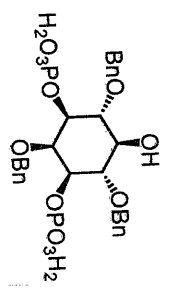

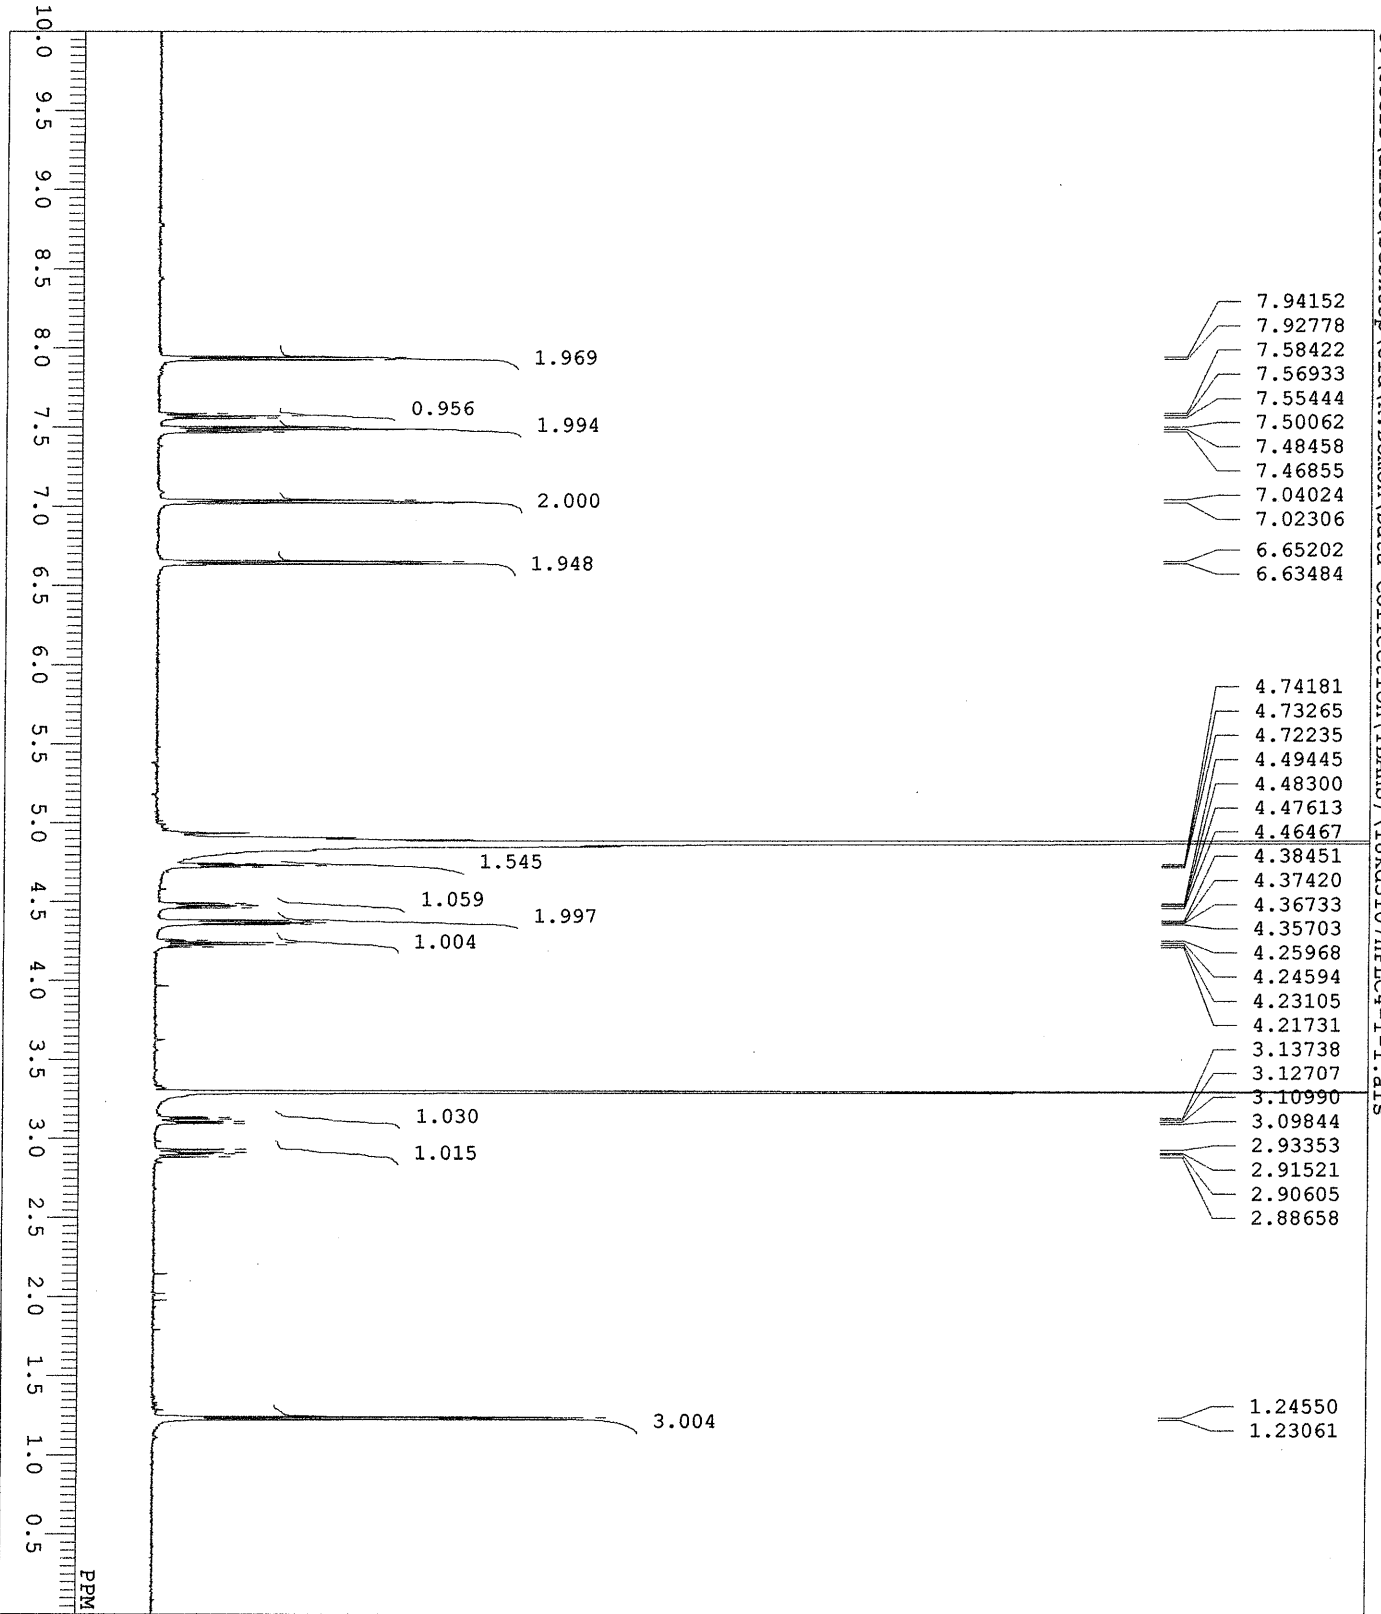

DFILE 18kd3107HPLC4-1-1.a1s  
 COMNT 2018-09-17 06:04:53  
 DATIM 1H  
 OBNUC 1H  
 EXMOD proton.jxp  
 OBFRO 500.16 MHz  
 OBSSET 2.41 KHz  
 OBFIN 6.01 Hz  
 POINT 13107  
 FREQU 7507.51 Hz  
 SCANS 7  
 ACQTM 1.7459 sec  
 PD 5.0000 sec  
 PM1 5.55 usec  
 IRNUC 1H  
 CTEMP 21.6 C  
 SIVNT CD3OD  
 EXREF 3.30 ppm  
 BF 0.12 Hz  
 RGAIN 30

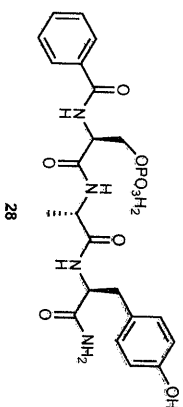



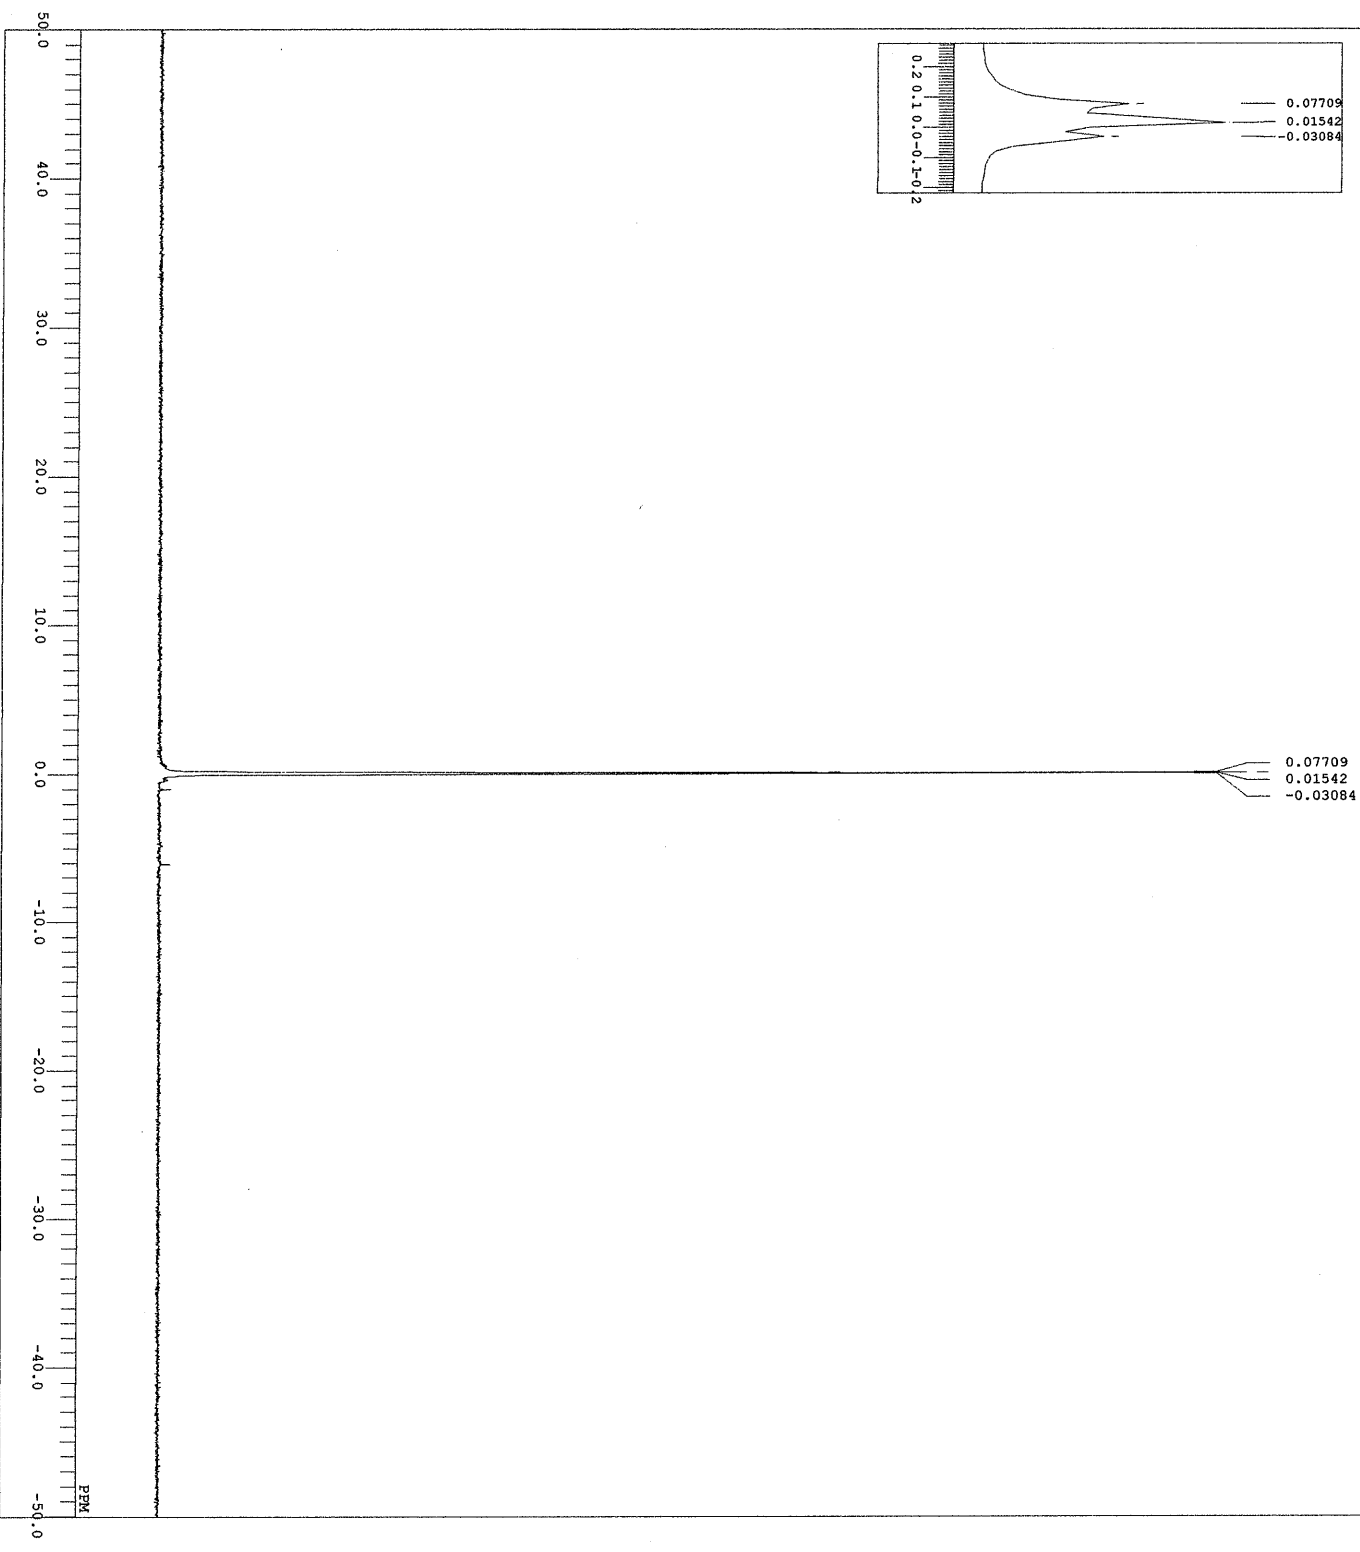

DR1F1 KF-0001-Ser-H-coupled-P-2\_copy2-1-1.als  
 COMPT 24-10-2019 23:36:23  
 PRTM 31P  
 ORNUC single\_pulse.jxp  
 EXPRO 158.38 MHz  
 OBSFO 7.99 KHz  
 OBSST 9.23 Hz  
 OBSLN 26214  
 POINT 64102.56 Hz  
 FRRNU 16986  
 SCANS 0.0000 sec  
 ACQTM 2.0000 sec  
 PD 4.80 usec  
 PVI 31P  
 IRNUC 20.7 c  
 CTEMP DMSO  
 SIVMT 0.00 ppm  
 EXKEP 1.20 Hz  
 BF 56  
 RGAIN

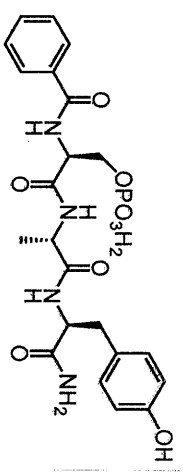

28

<sup>1</sup>H coupled <sup>31</sup>P NMR

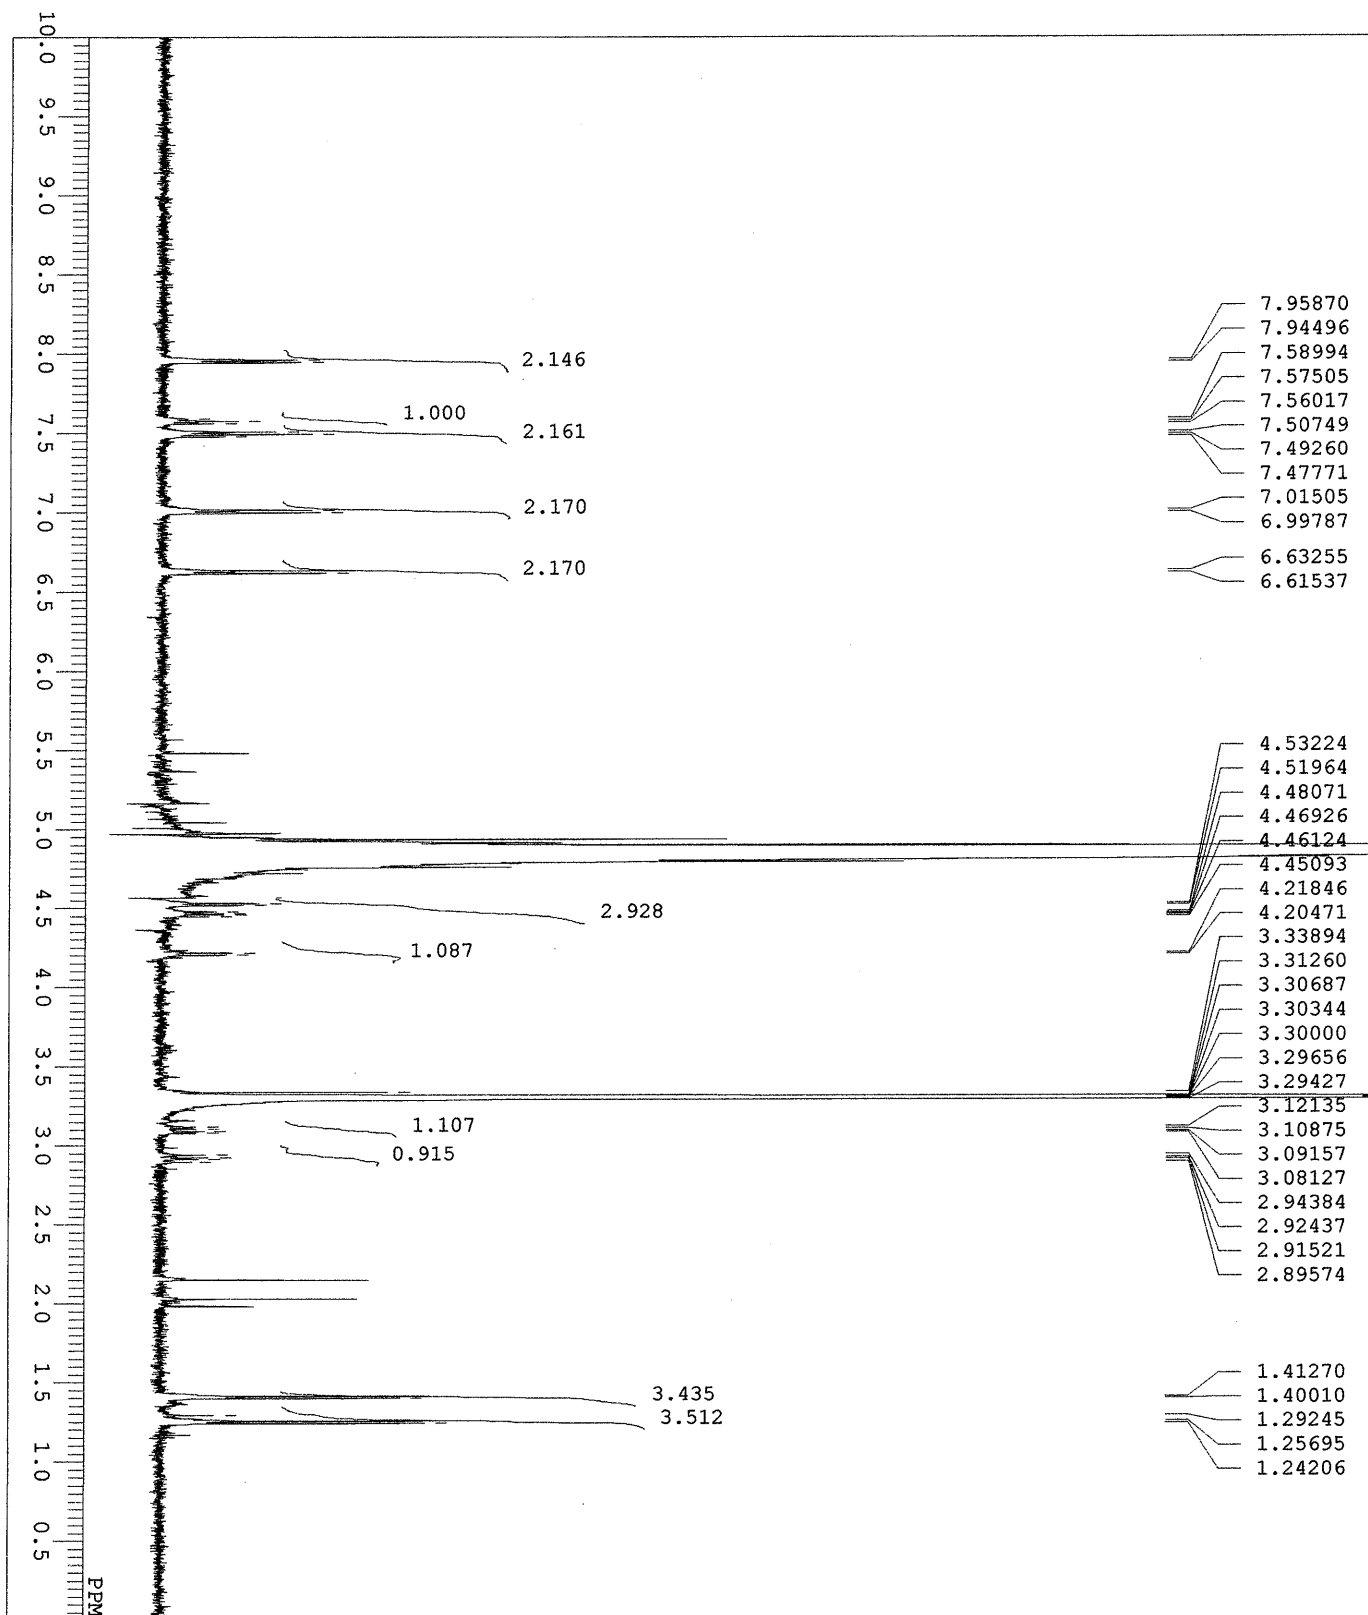

DFILE 18k3154HPLC7-1-1.als  
 COMNT  
 DATIM 2018-09-29 21:10:27  
 OBNDC 1H  
 EXMOD proton.jxp  
 OBFRO 500.16 MHz  
 OBSFT 2.41 KHz  
 OBFIN 6.01 Hz  
 POINT 13107  
 FREQU 7507.51 Hz  
 SCANS 8  
 ACQTM 1.7459 sec  
 PD 5.0000 sec  
 PML 5.55 usec  
 IRNUC 1H  
 CTEMP 21.4 C  
 SIVNT CD3OD  
 EXREF 3.30 ppm  
 BF 0.12 Hz  
 RGAIN 30

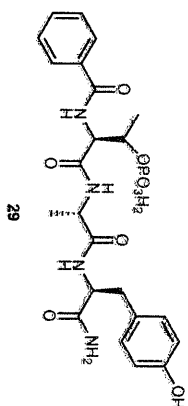

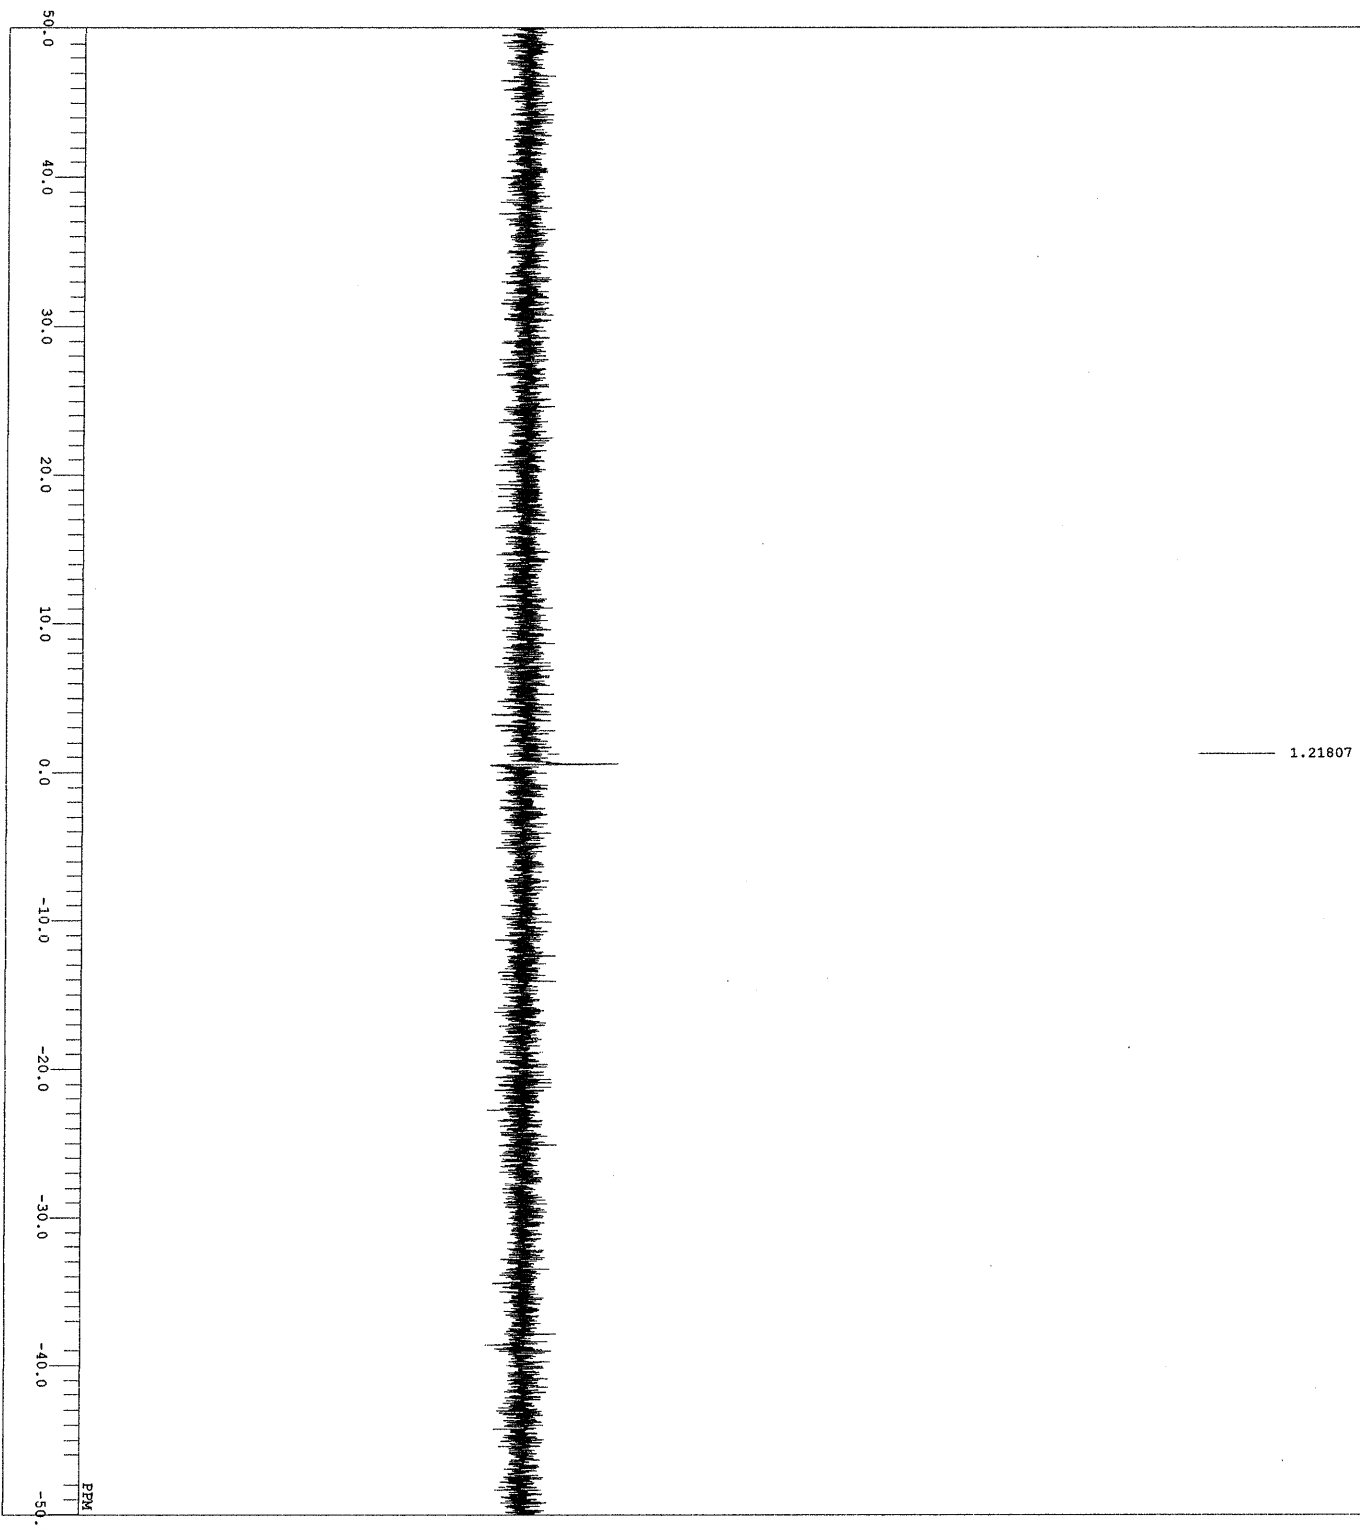

FILE 18k3128HPLC5\_P-1-1.als  
 COMNT  
 DATEM 20-09-2018 08:28:17  
 ORNTIC 31P  
 EXMOD carbon-13p  
 ORPRD 158.59 MHz  
 OBSER 7.99 KHZ  
 ORPTN 5.23 Hz  
 FOINT 28214  
 FREQD 64102.36 Hz  
 SCANS 1014  
 ACQTM 0.4089 sec  
 PD 2.0000 sec  
 PWL 4.80 usec  
 IRNTIC 1H  
 CTEMP 20.3 c  
 SLVNT DMSO  
 EXREF 0.00 PPM  
 BF 0.12 Hz  
 RGAIN 56

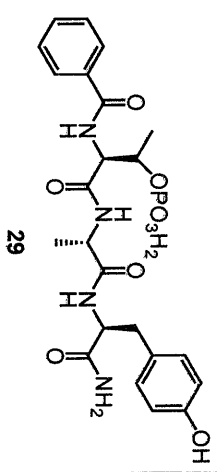



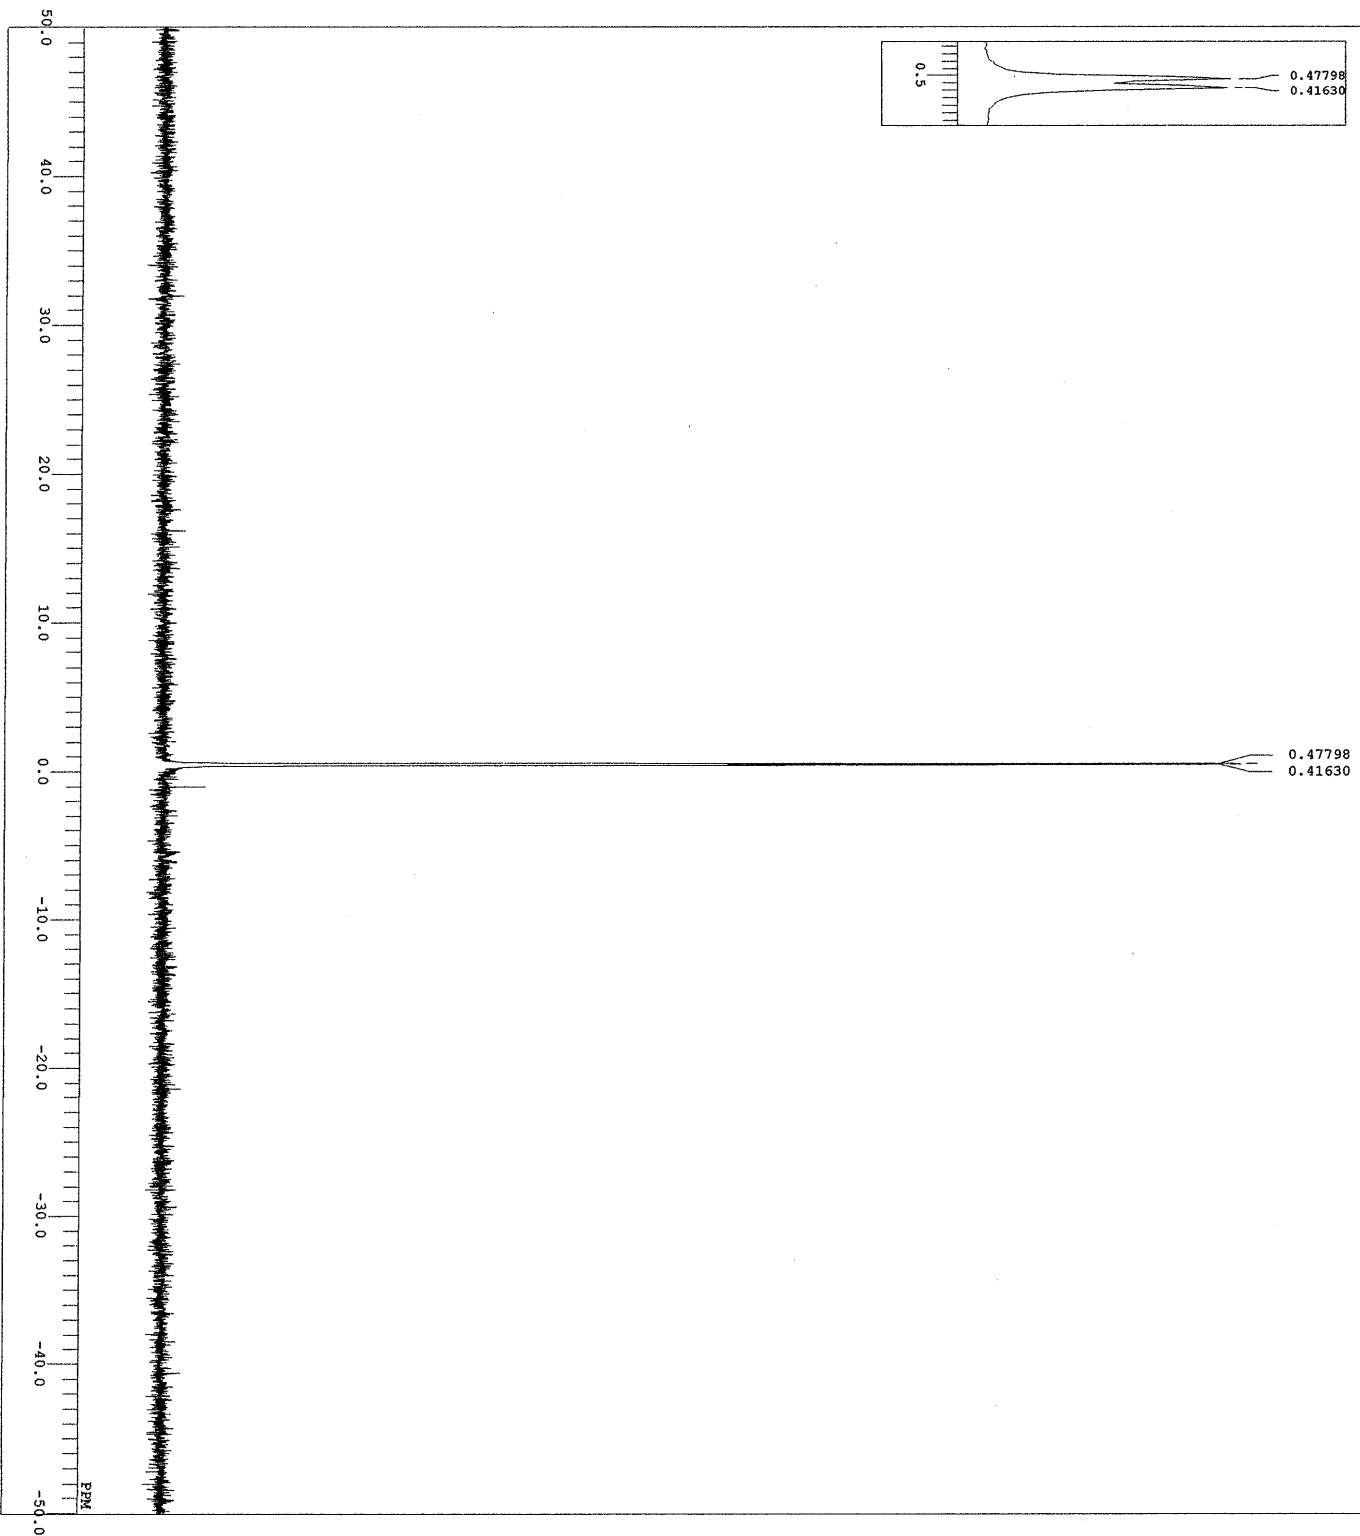

DFILE KF-0001-1hr-H-coupled-P\_copy2-1-1.als  
 CONNT 28-09-2019 22:39:48  
 DATEM 31P  
 ORNTC 31P  
 EXMOD single\_pulse.jxp  
 OBPFO 158.58 MHz  
 OBSSEI 7.95 KHz  
 OBSFIN 9.23 Hz  
 POINT 28214  
 FREQOU 64102.56 Hz  
 SCANS 20863  
 ACQTM 0.0000 sec  
 PD 2.0000 sec  
 PFI 4.80 usec  
 IRNUC 31P  
 CTEMP 20.7 c  
 SIVMT DMSO  
 EXREF 0.00 ppm  
 BF 0.12 Hz  
 RGAIN 56

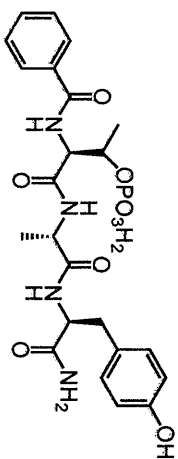

29

<sup>1</sup>H coupled <sup>31</sup>P NMR

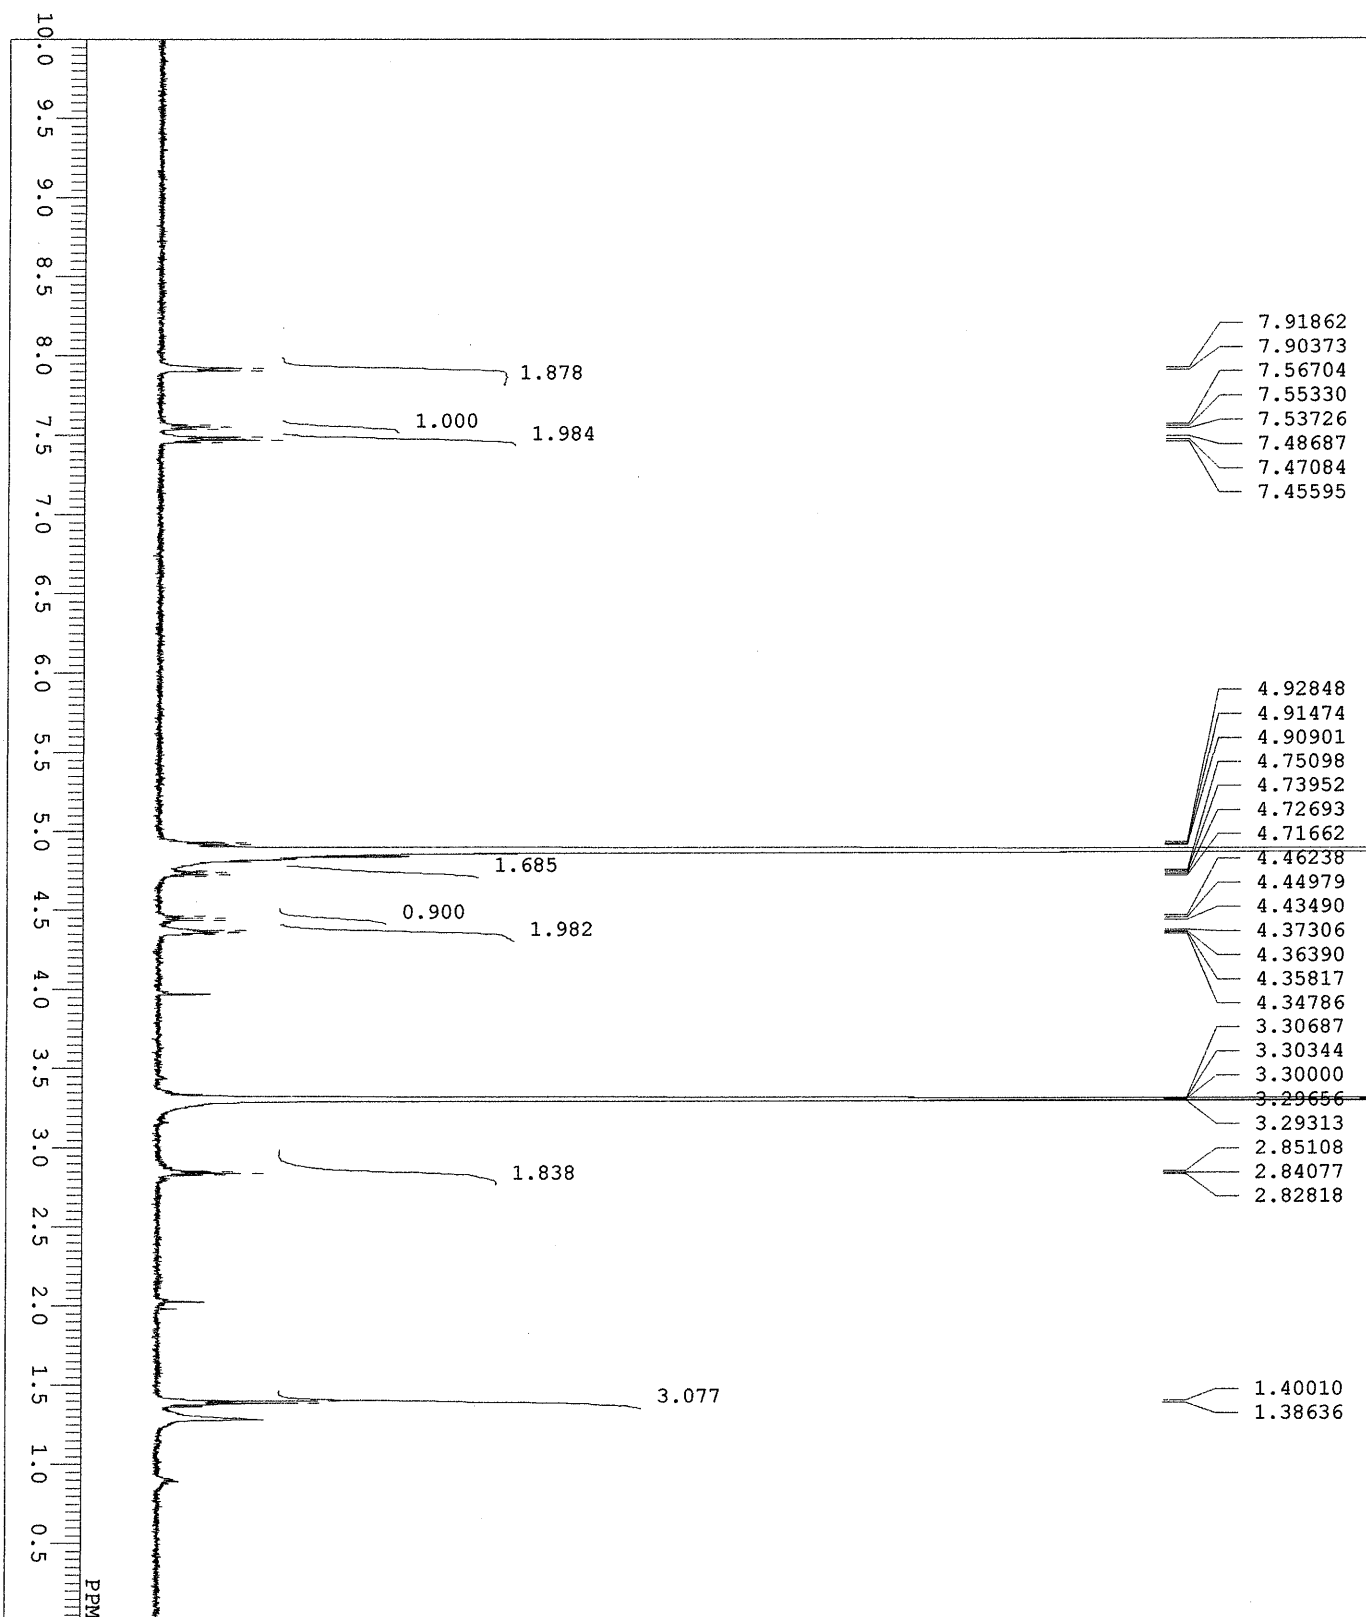

DEFILE 18kd3165retrYHPLC8-1-1.als  
 COMMENT 2018-09-28 20:57:52  
 DATIM 1H  
 OBNUC 1H  
 EXMOD proton.fxp  
 OBFRO 500.16 MHz  
 OBSET 2.41 KHz  
 OBFIN 6.01 Hz  
 POINT 13107  
 FREQU 7507.51 Hz  
 SCANS 8  
 ACQTM 1.7459 sec  
 PD 5.0000 sec  
 PW1 5.55 usec  
 IRNUC 1H  
 CTEMP 21.5 c  
 SLVNT CD3OD  
 EXREF 3.30 ppm  
 BF 0.12 Hz  
 RGAIN 32

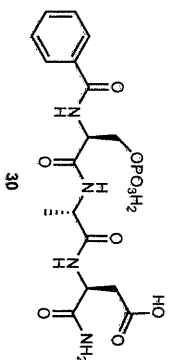

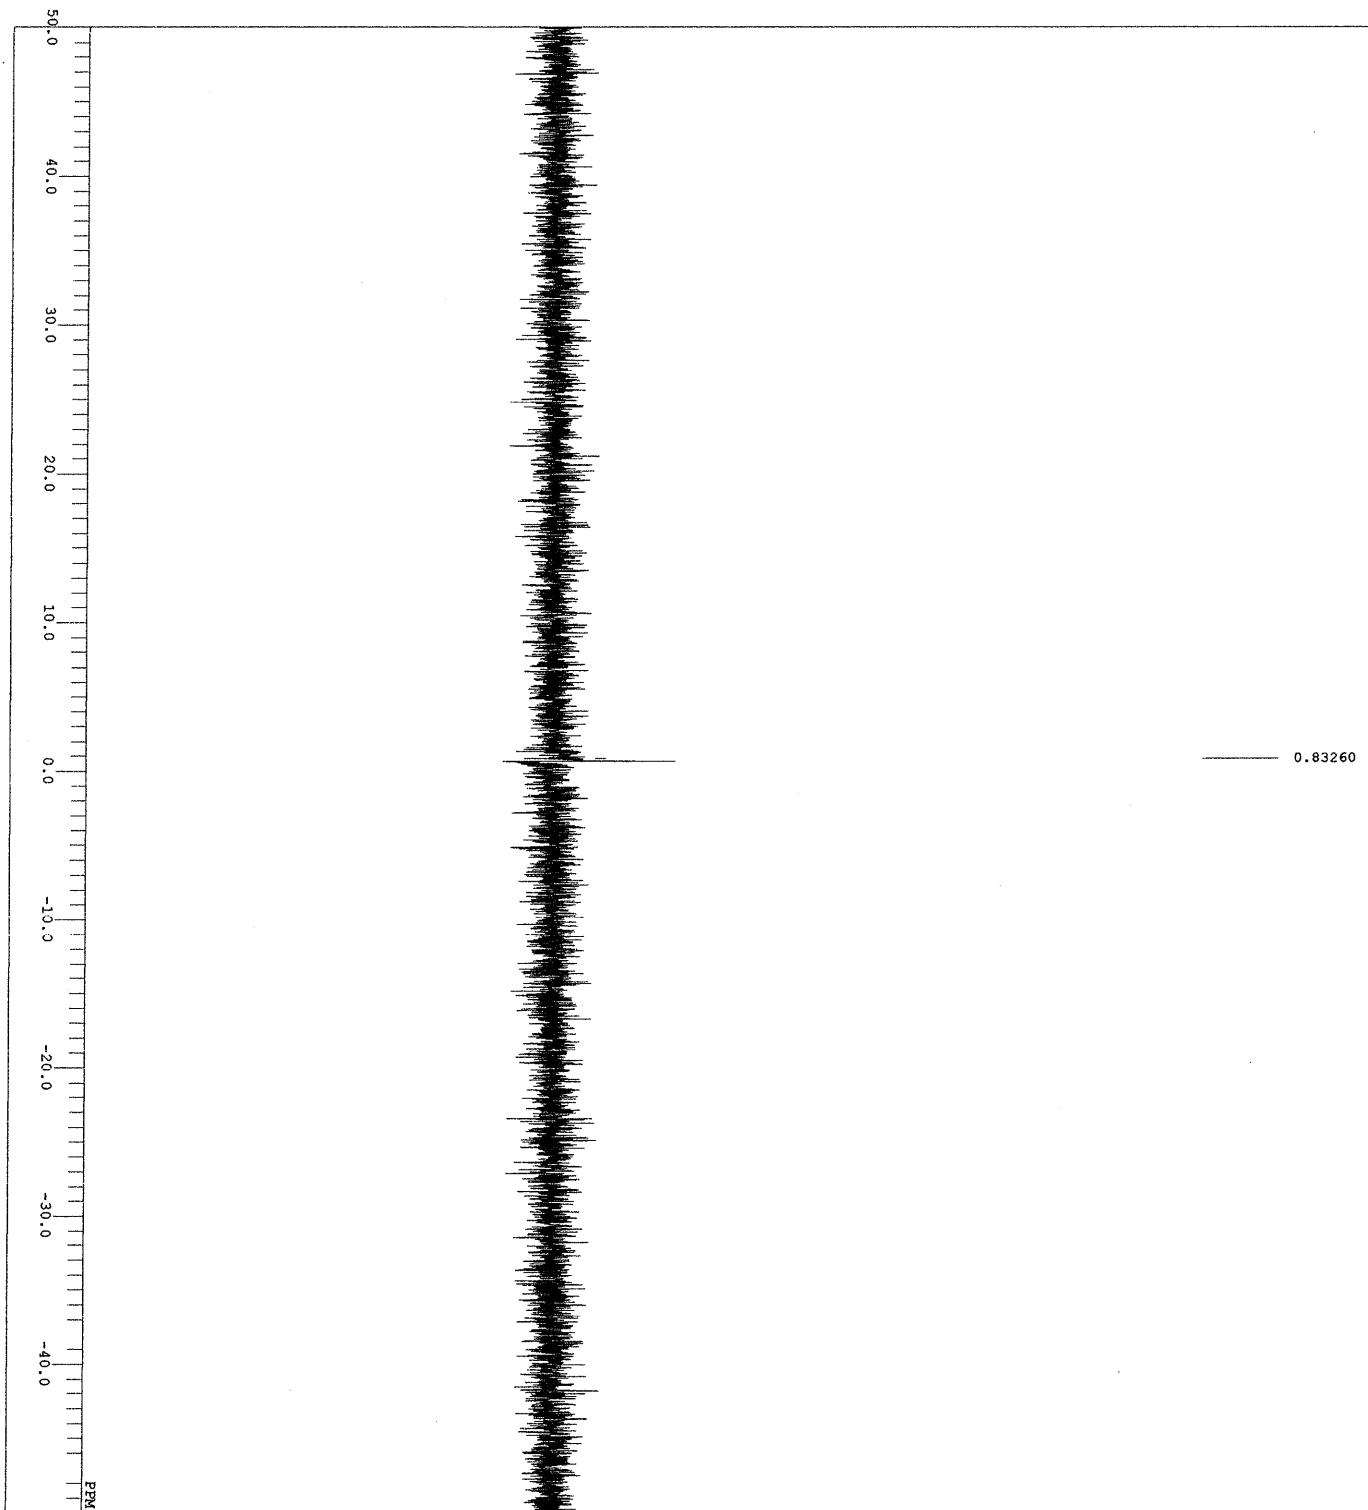

DNAME 18kd3110\PRCS\_P-1-1.als  
 COUNT 18-09-2018 09:17:33  
 DNAME 18-09-2018 09:17:33  
 OBSNO 31P  
 EXMOD carbon.jxp  
 OBSFO 158.59 MHz  
 OBSST 7.99 KHz  
 OBSFN 9.23 Hz  
 POINT 26214  
 FREQ 64102.56 Hz  
 SCANS 539  
 ACQTM 0.4089 sec  
 PD 2.0000 sec  
 PUL 4.80 usec  
 PRNUC 1H  
 CTEMP 20.4 C  
 SLVMT CD3OD  
 EXREF 0.00 PPM  
 BF 0.12 Hz  
 SFC 56  
 RGAIN

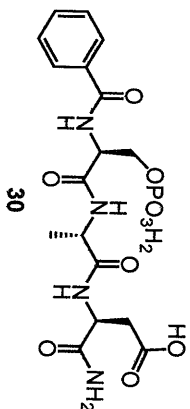

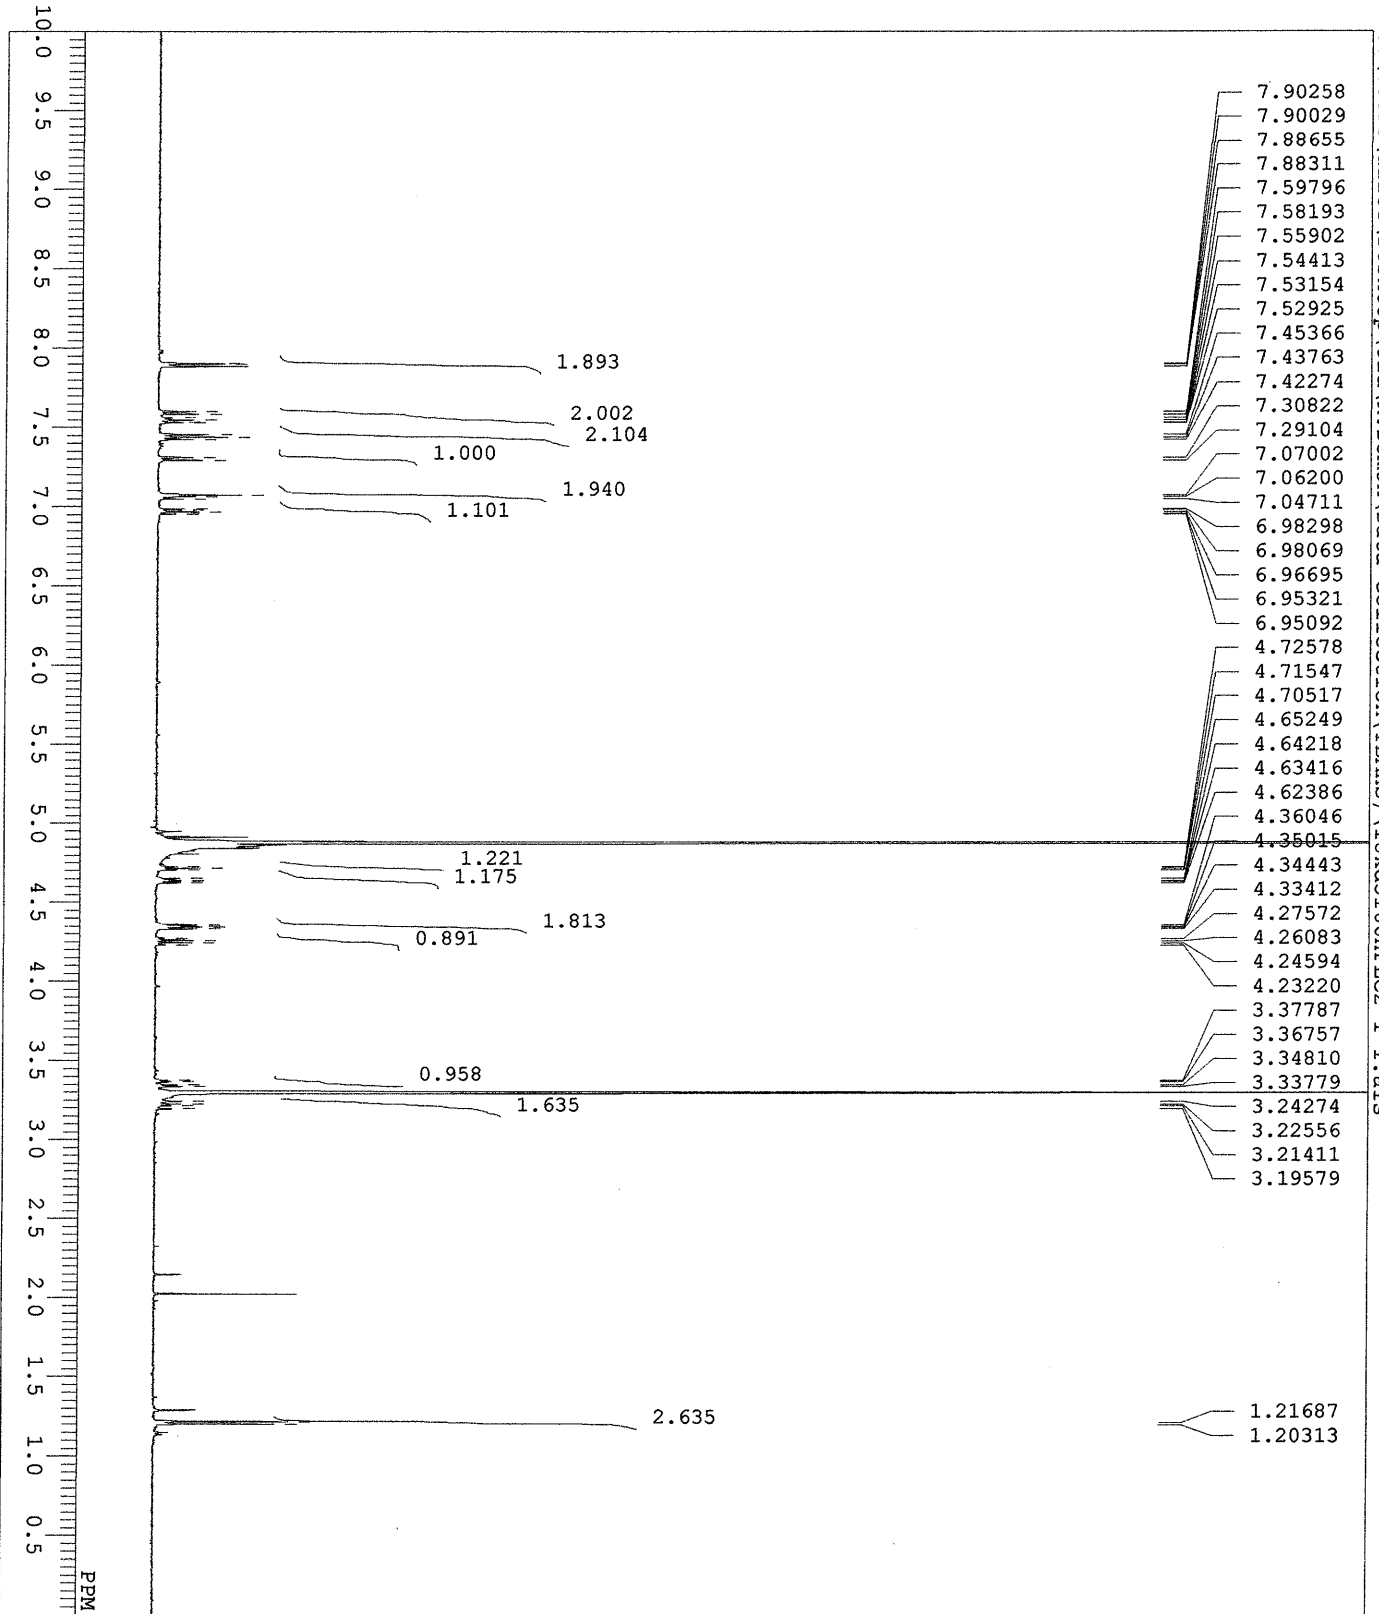

DF FILE 18kd3166HPLC2-1-1.a1s  
 COMNT 2018-09-28 18:13:05  
 DATIM 1H  
 OBNUC 1H  
 EXMOD proton.jxp  
 OBFRO 500.16 MHz  
 OBSET 2.41 KHz  
 OBFIN 6.01 Hz  
 POINT 13107  
 FREOU 7507.51 Hz  
 SCANS 8  
 ACQTM 1.7459 sec  
 PD 5.0000 sec  
 PM1 5.55 usec  
 IRNUC 1H  
 CTEMP 21.5 C  
 SLVNT CD3OD  
 EXREF 3.30 ppm  
 BF 0.12 Hz  
 RGAIN 30

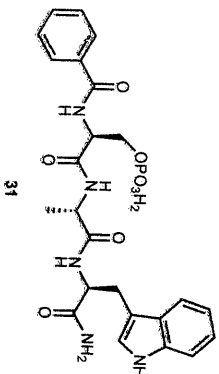

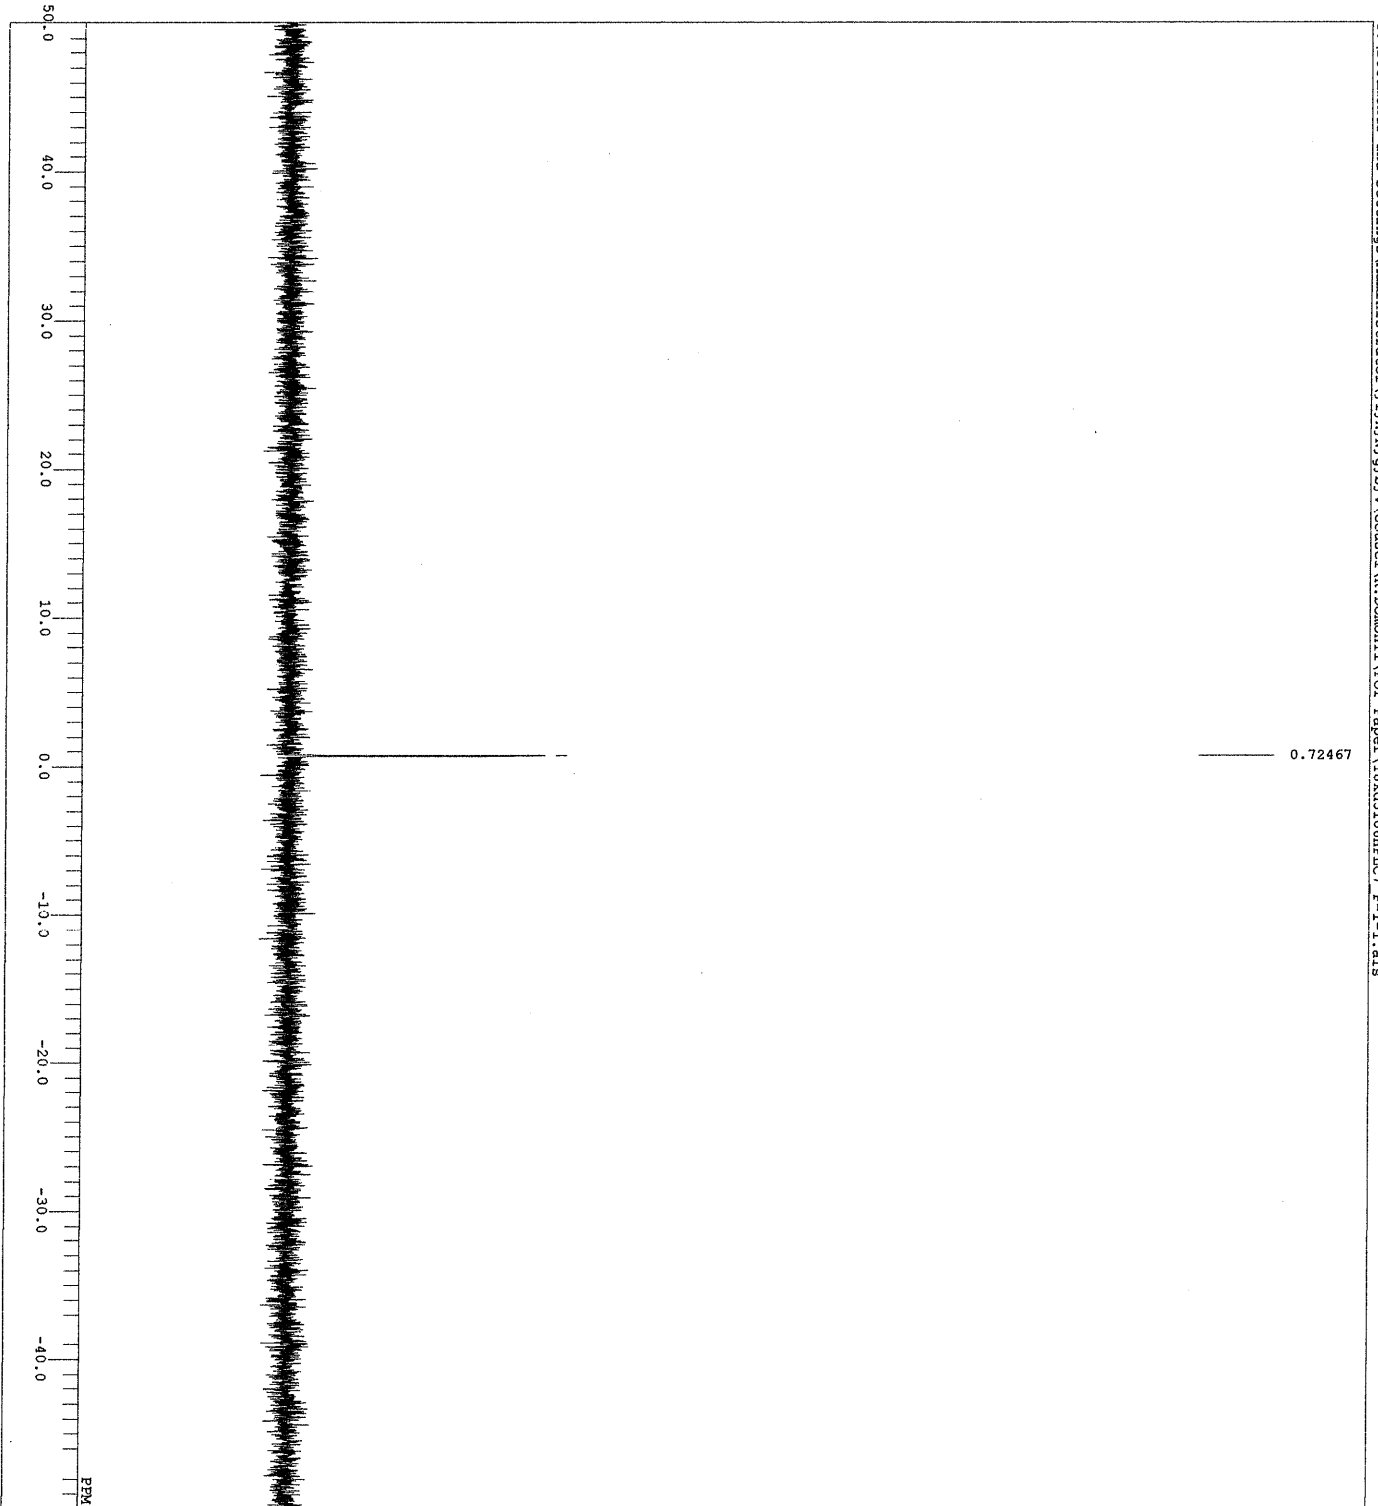

DPFILE 18kd3106HPLC7\_P-1-1.als  
 COMNT 18-09-2018 09:41:24  
 DATIM 18-09-2018 09:41:24  
 OBNDC 31P  
 EXMOD carbon-13p  
 OBSRG 156.59 MHz  
 OBSRT 7.99 KHz  
 OBSRN 9.23 Hz  
 POINP 26214  
 FREQD 64102.56 Hz  
 SCANS 26  
 ACQTM 0.4089 sec  
 PD 2.0000 sec  
 PVI 4.80 usec  
 IRNUC 1H  
 CTEMP 20.3 c  
 SIVNT CD3OD  
 EXREF 0.00 ppm  
 BF 0.12 Hz  
 RGAIN 56

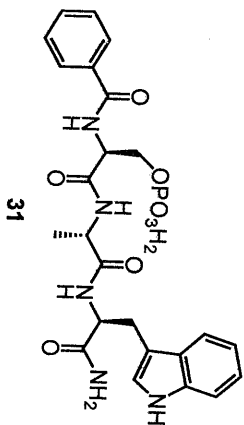

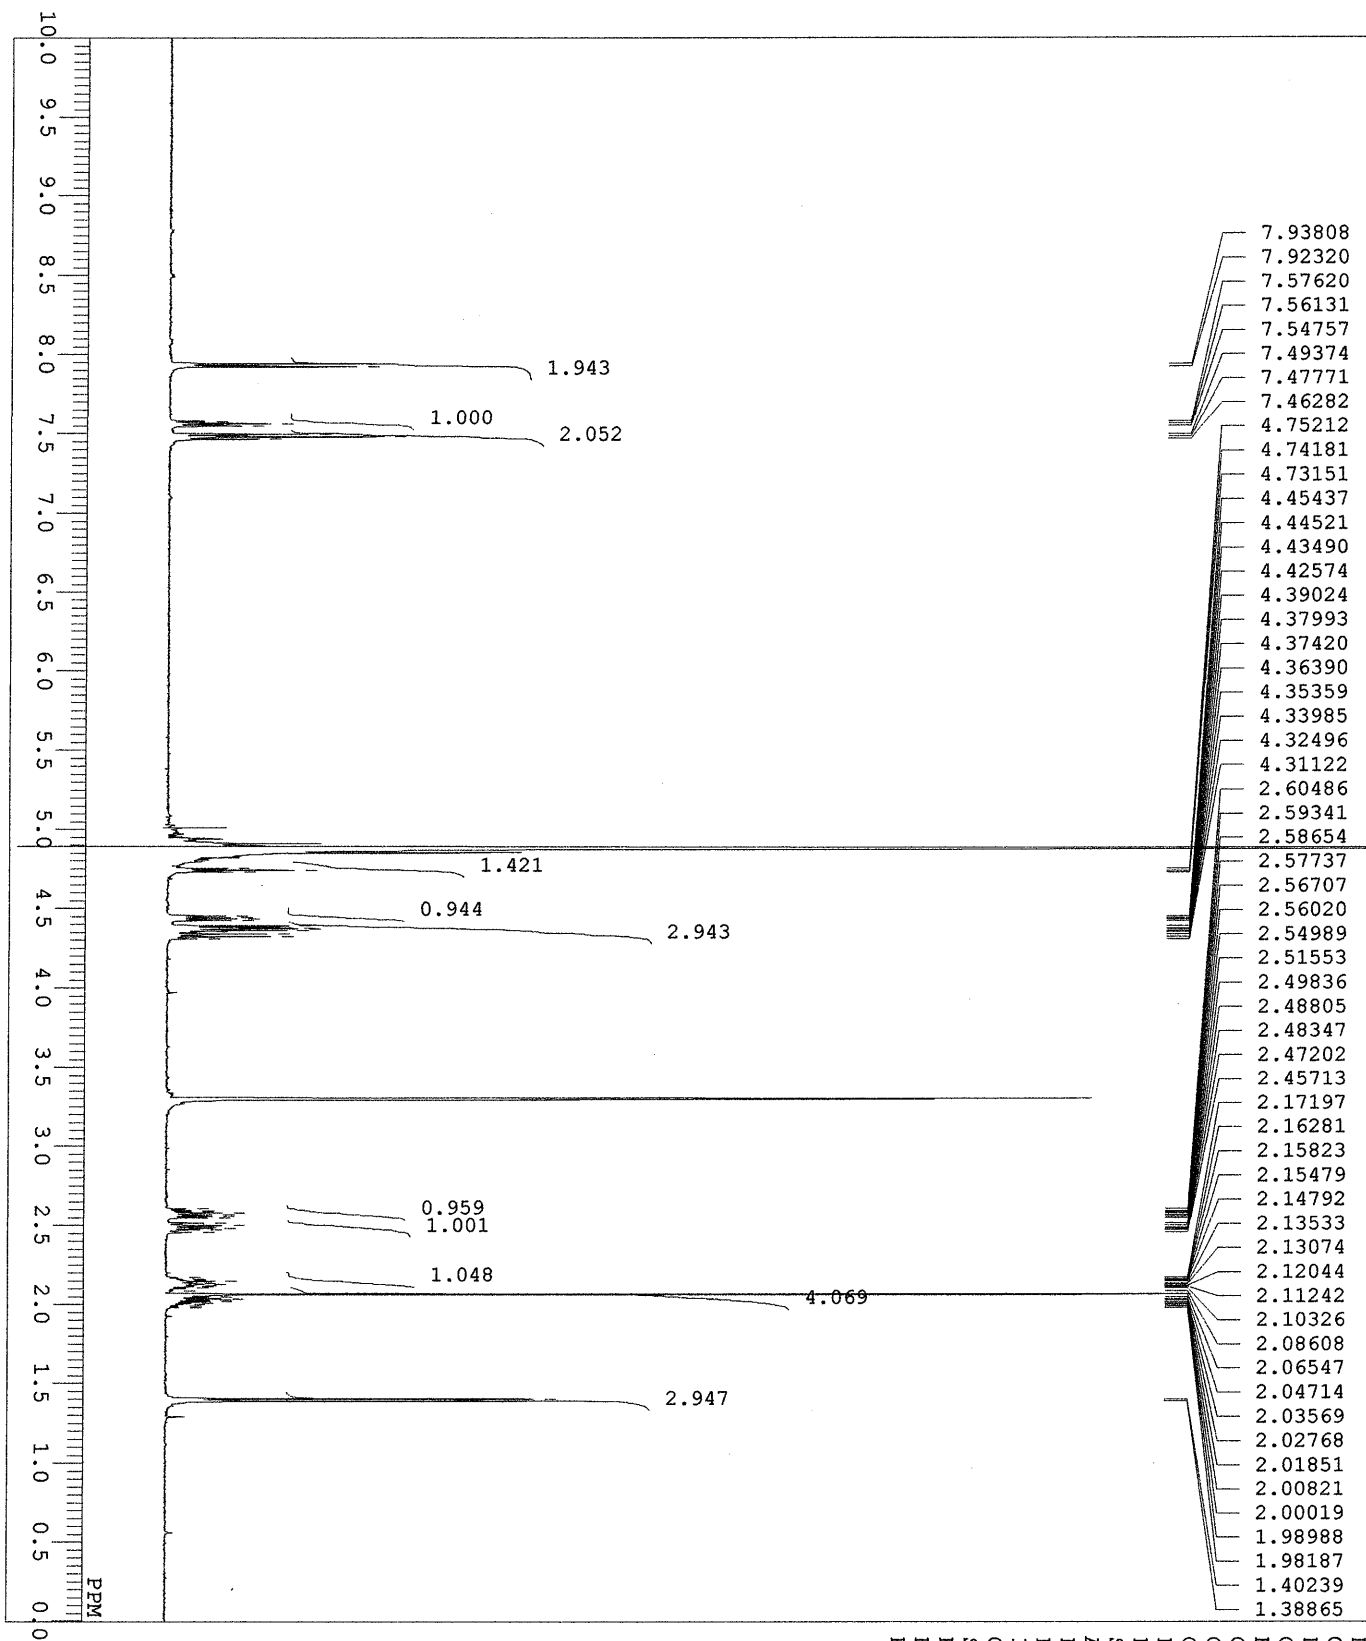

DFILE 18kd3108HPLC4-1-1.als  
 COMMENT 2018-09-17 06:07:40  
 DATIM 1H  
 OBNM 1H  
 OBNM proton.jxp  
 EXMOD 500.16 MHz  
 OBFRO 2.41 KHZ  
 OBSSET 6.01 HZ  
 OBFIN 13107  
 POINT 7507.51 HZ  
 FREQ 5  
 SCANS 1.7459 sec  
 ACQTM 5.0000 sec  
 PD 5.55 usec  
 PW1 1H  
 IRNUC 21.5 c  
 CTEMP CD3OD  
 SLVNT 3.30 ppm  
 EXREF 0.12 Hz  
 BF 30  
 RGAIN

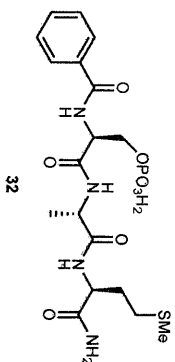

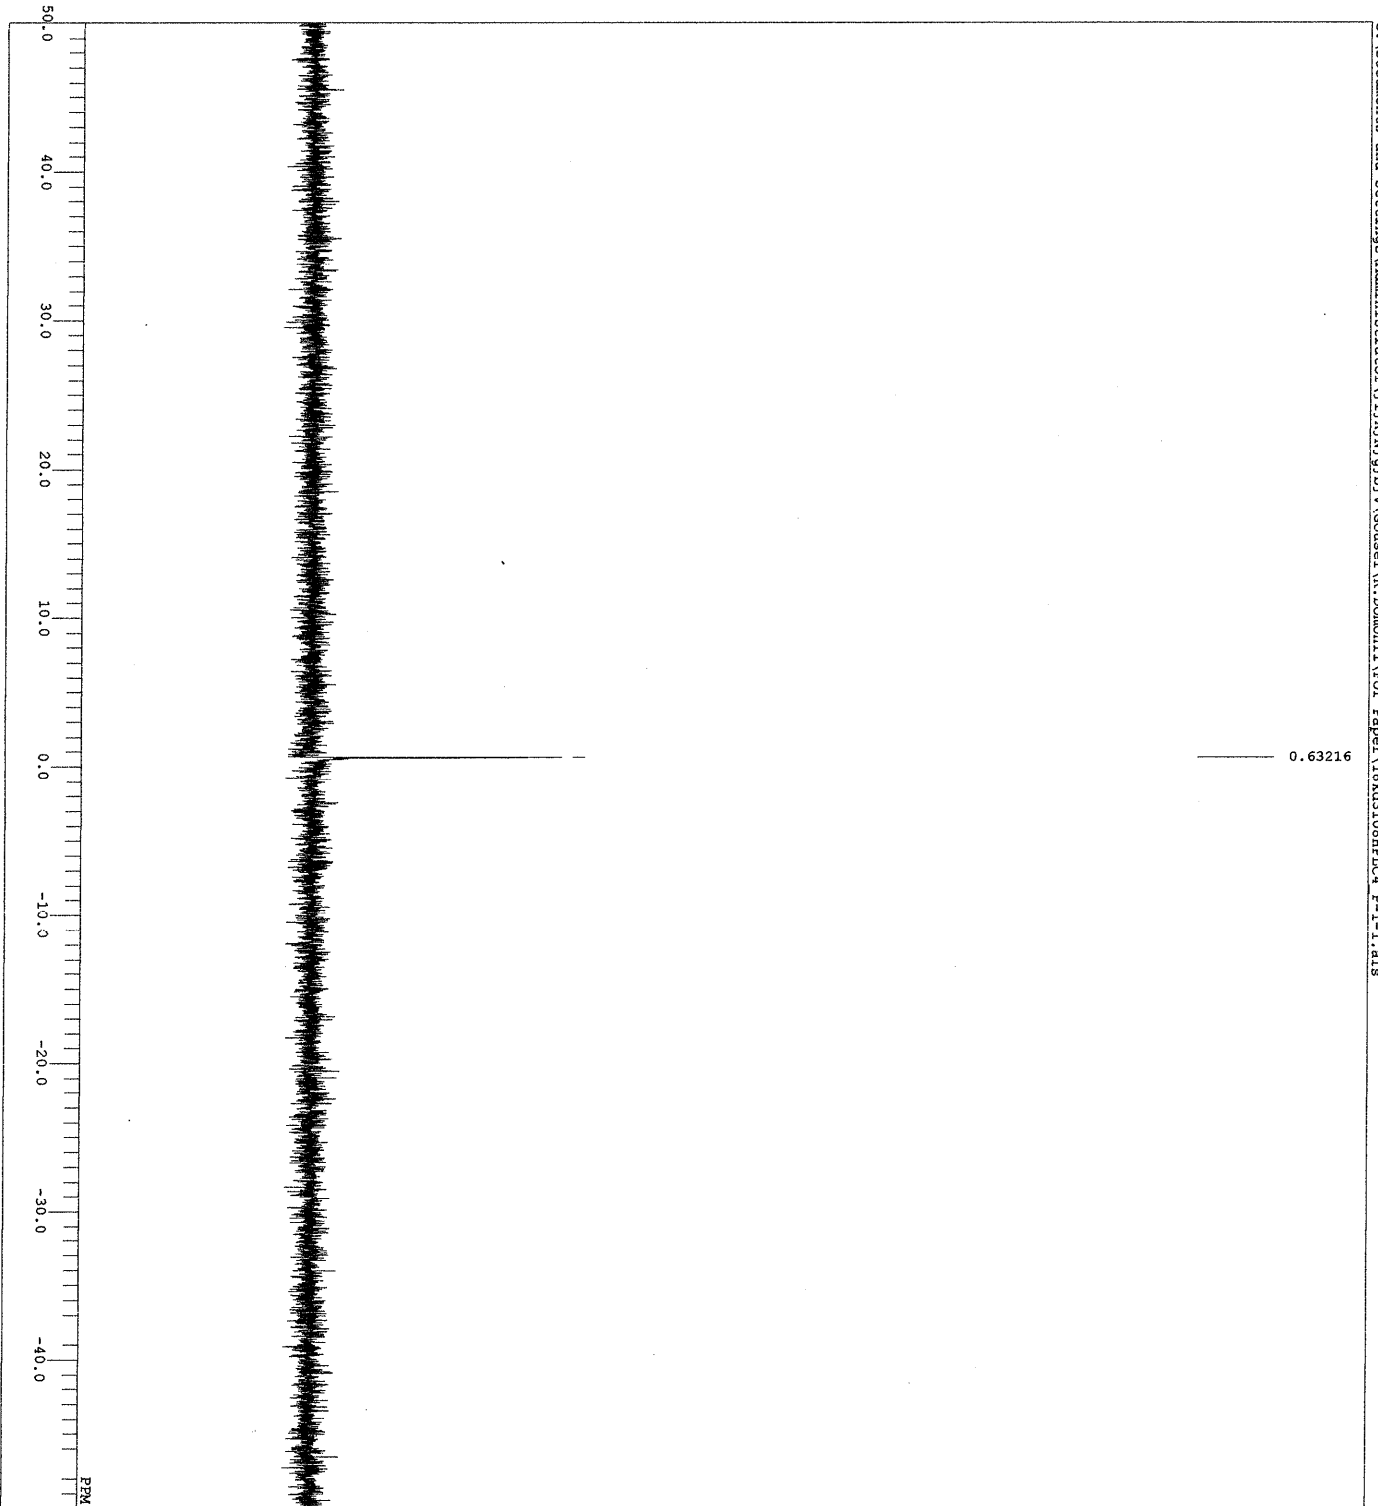

FILE 18k43108HPLC4\_P-1-1.a1s  
 COMMENT  
 DATE 18-09-2018 09:50:17  
 NAME 31P  
 EXMOD carbon-13p  
 OBSRG 158.59 MHz  
 OBSRT 7.99 KHz  
 POINT 9.23 Hz  
 POINT 26214  
 FREQD 64102.36 Hz  
 SCANS 6  
 ACQTM 0.4089 sec  
 PD 2.0000 sec  
 PW1 4.80 usec  
 IRATC 1H  
 CTEMP 20.2 c  
 SLVNT CD3OD  
 EXREF 0.00 ppm  
 BF 0.12 Hz  
 RGAIN 56

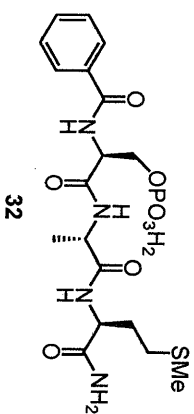

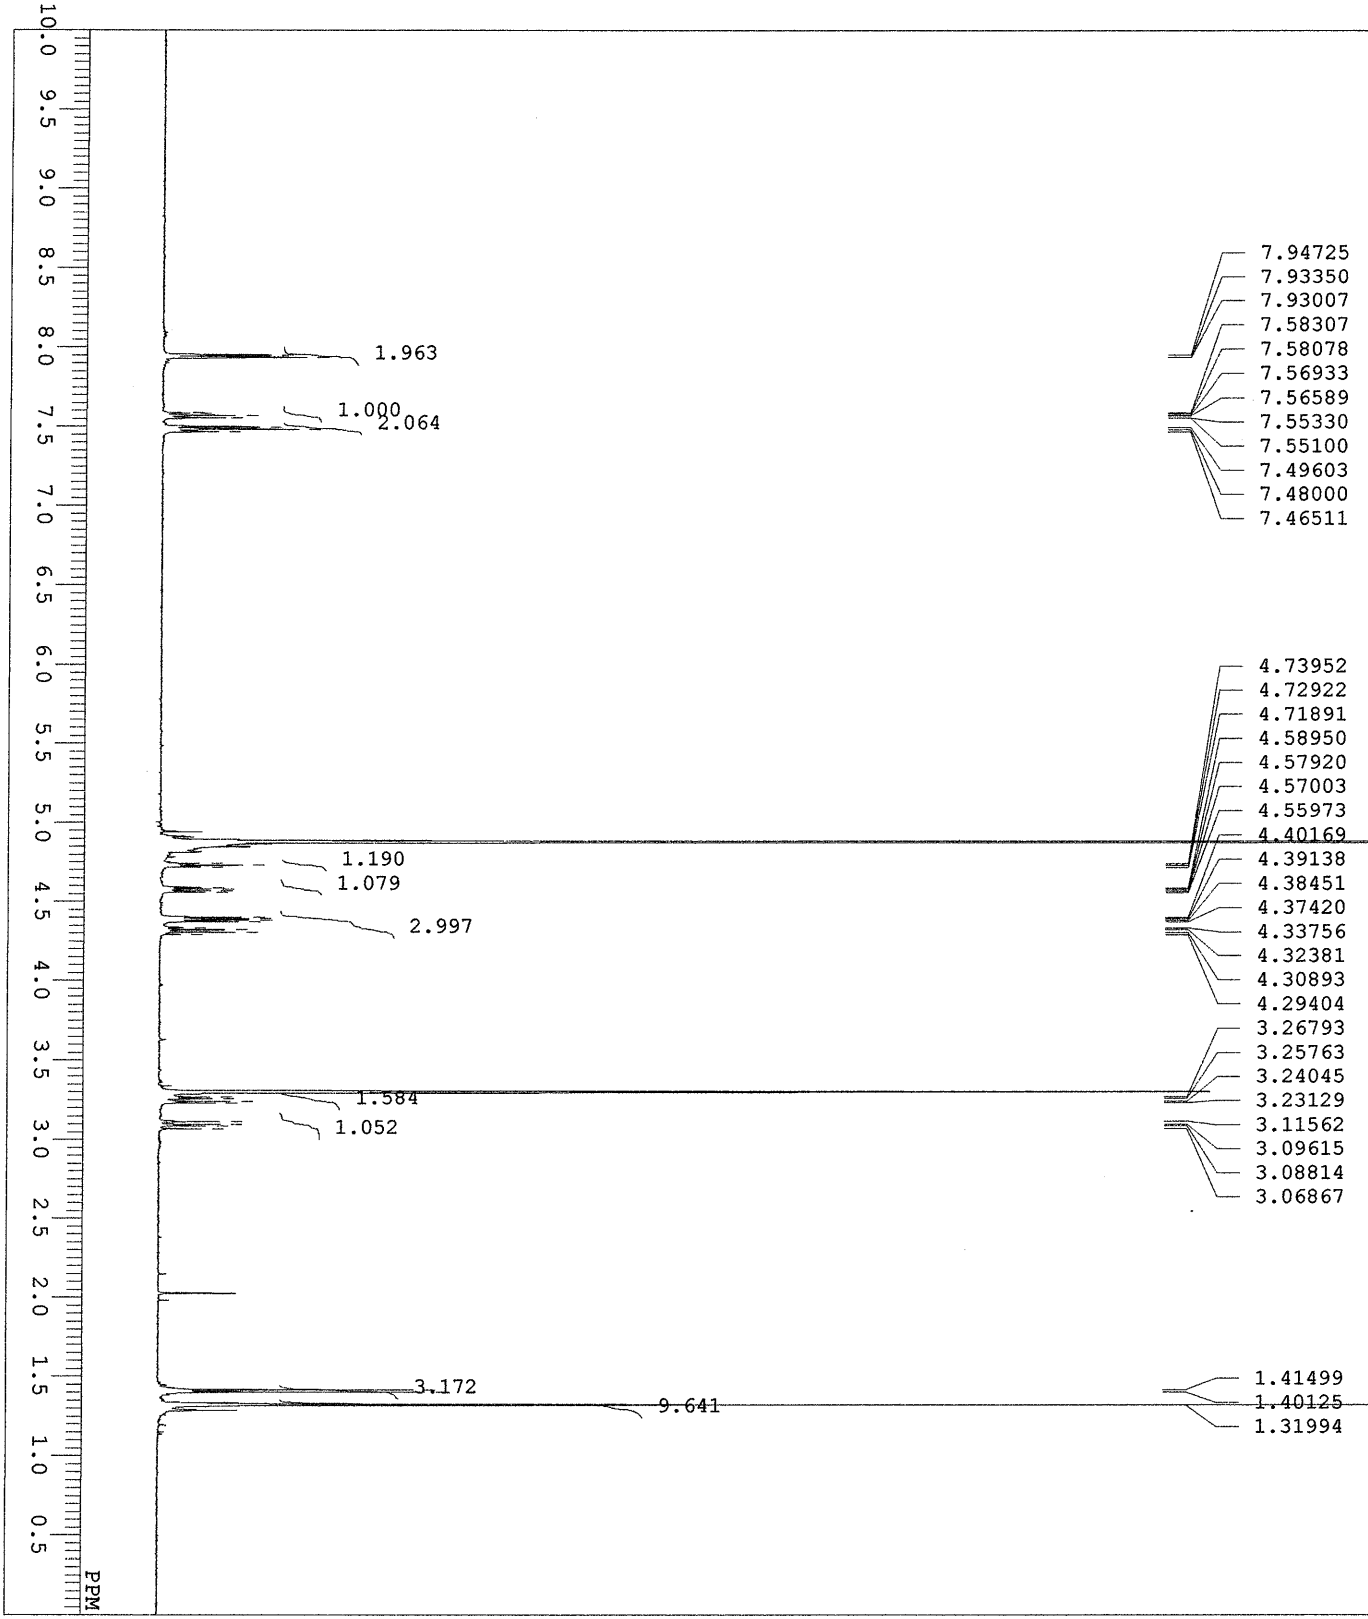

DFILE 18kd3167HPLC5-1-1.a1s  
 COMMENT 2018-09-28 18:16:32  
 DATIM 1H  
 OBNUC  
 EXMOD proton.jxp  
 OBFRO 500.16 MHz  
 OBSET 2.41 KHz  
 OBFIN 6.01 Hz  
 POINT 13107  
 FREQU 7507.51 Hz  
 SCANS 8  
 ACQTM 1.7459 sec  
 PD 5.0000 sec  
 PW1 5.55 usec  
 IRNUC 1H  
 CTEMP 21.7 c  
 SLVNT CD3OD  
 EXREF 3.30 ppm  
 BF 0.12 Hz  
 RGAIN 30

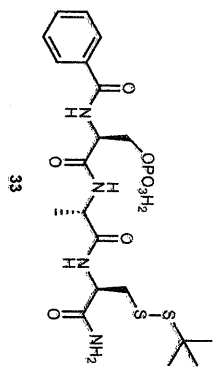



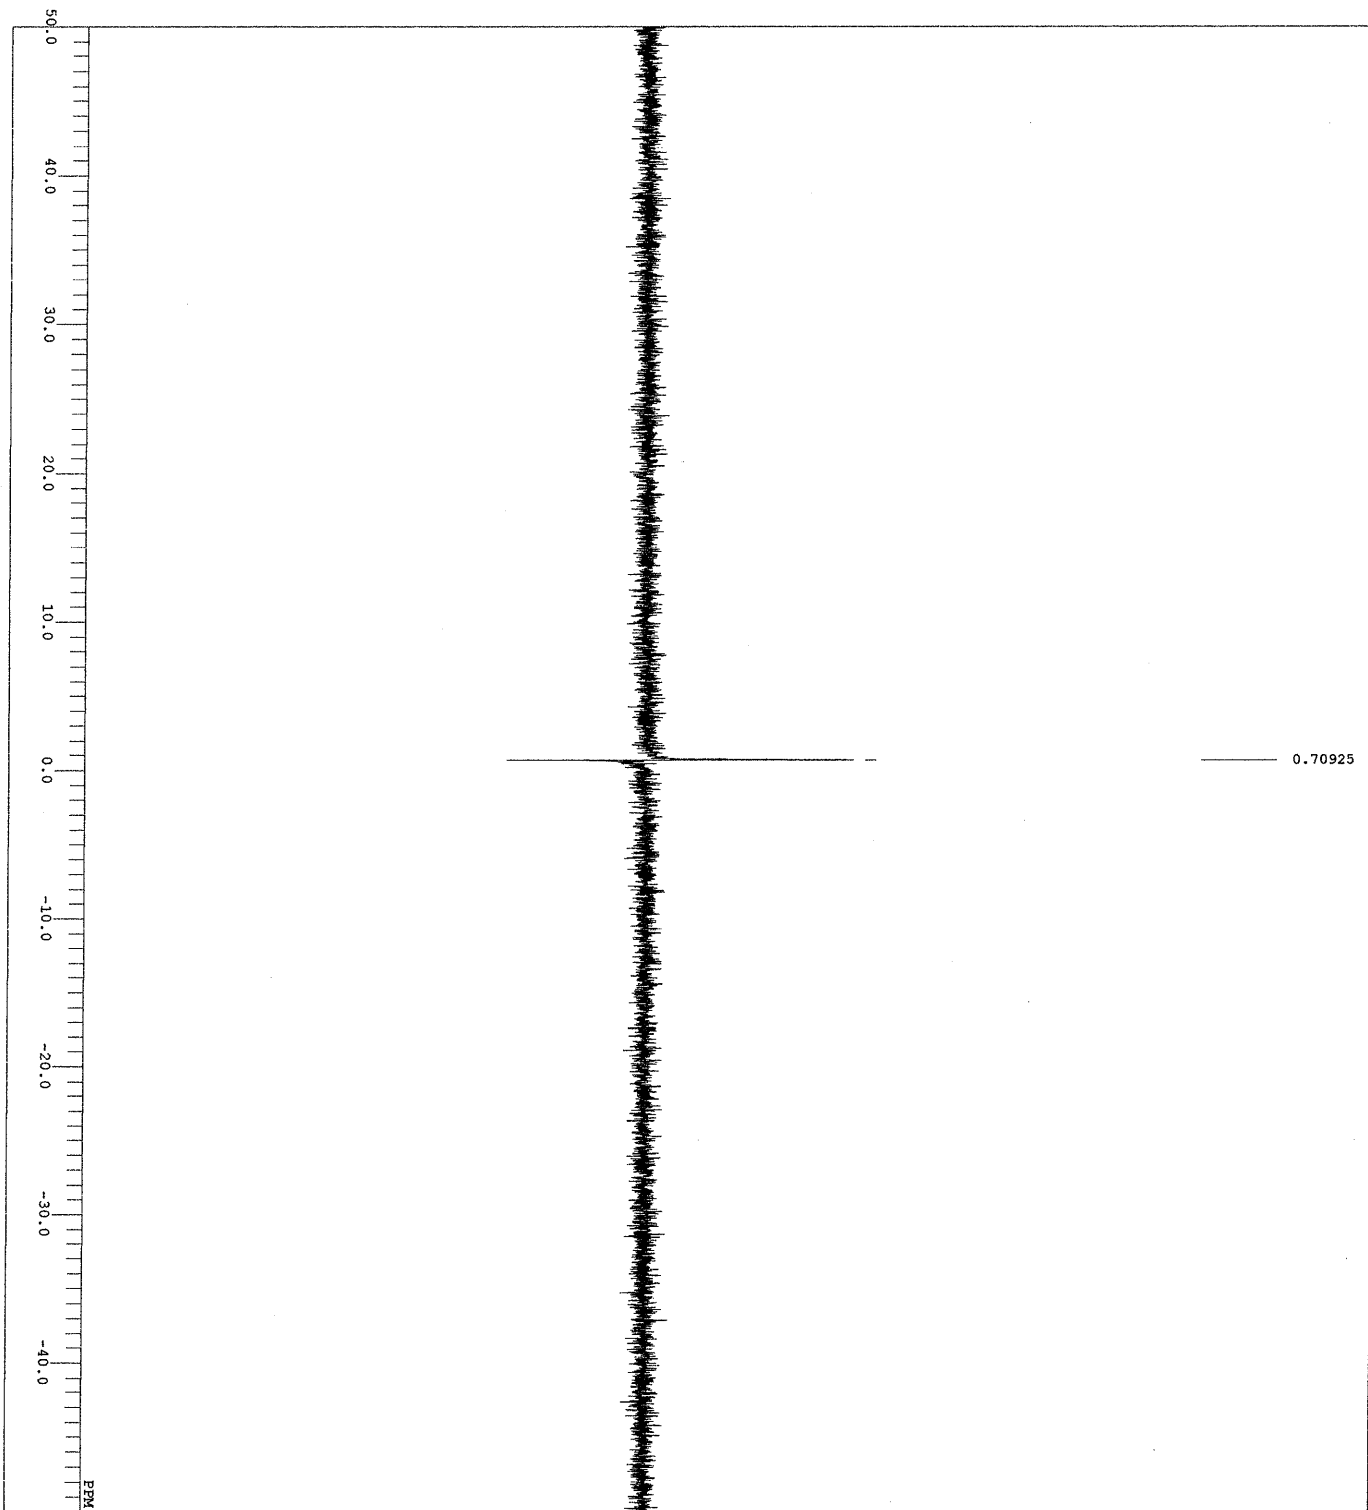

DTITLE 18k3167HPL5\_P-1-1\_als  
 COMNT 28-09-2018 18:58:16  
 DATIM 28-09-2018 18:58:16  
 ORBNC 31P  
 ERMDC carbon.jxp  
 OBFRC 158.59 MHz  
 OBSER 7.99 KHz  
 OBFIN 9.23 Hz  
 POINT 25214  
 FREQU 64102.56 Hz  
 SCANS 8  
 ACOIM 0.4089 sec  
 PD 2.0000 sec  
 PUL 4.80 usec  
 IRMTC 1H 20.3 C  
 CTEMP CD30D 0.00 ppm  
 EXREF BF 0.12 Hz  
 RGAIN 36

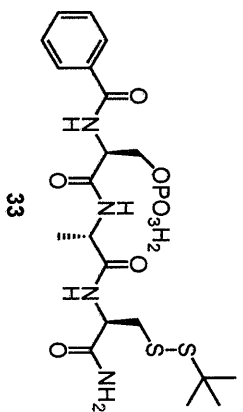

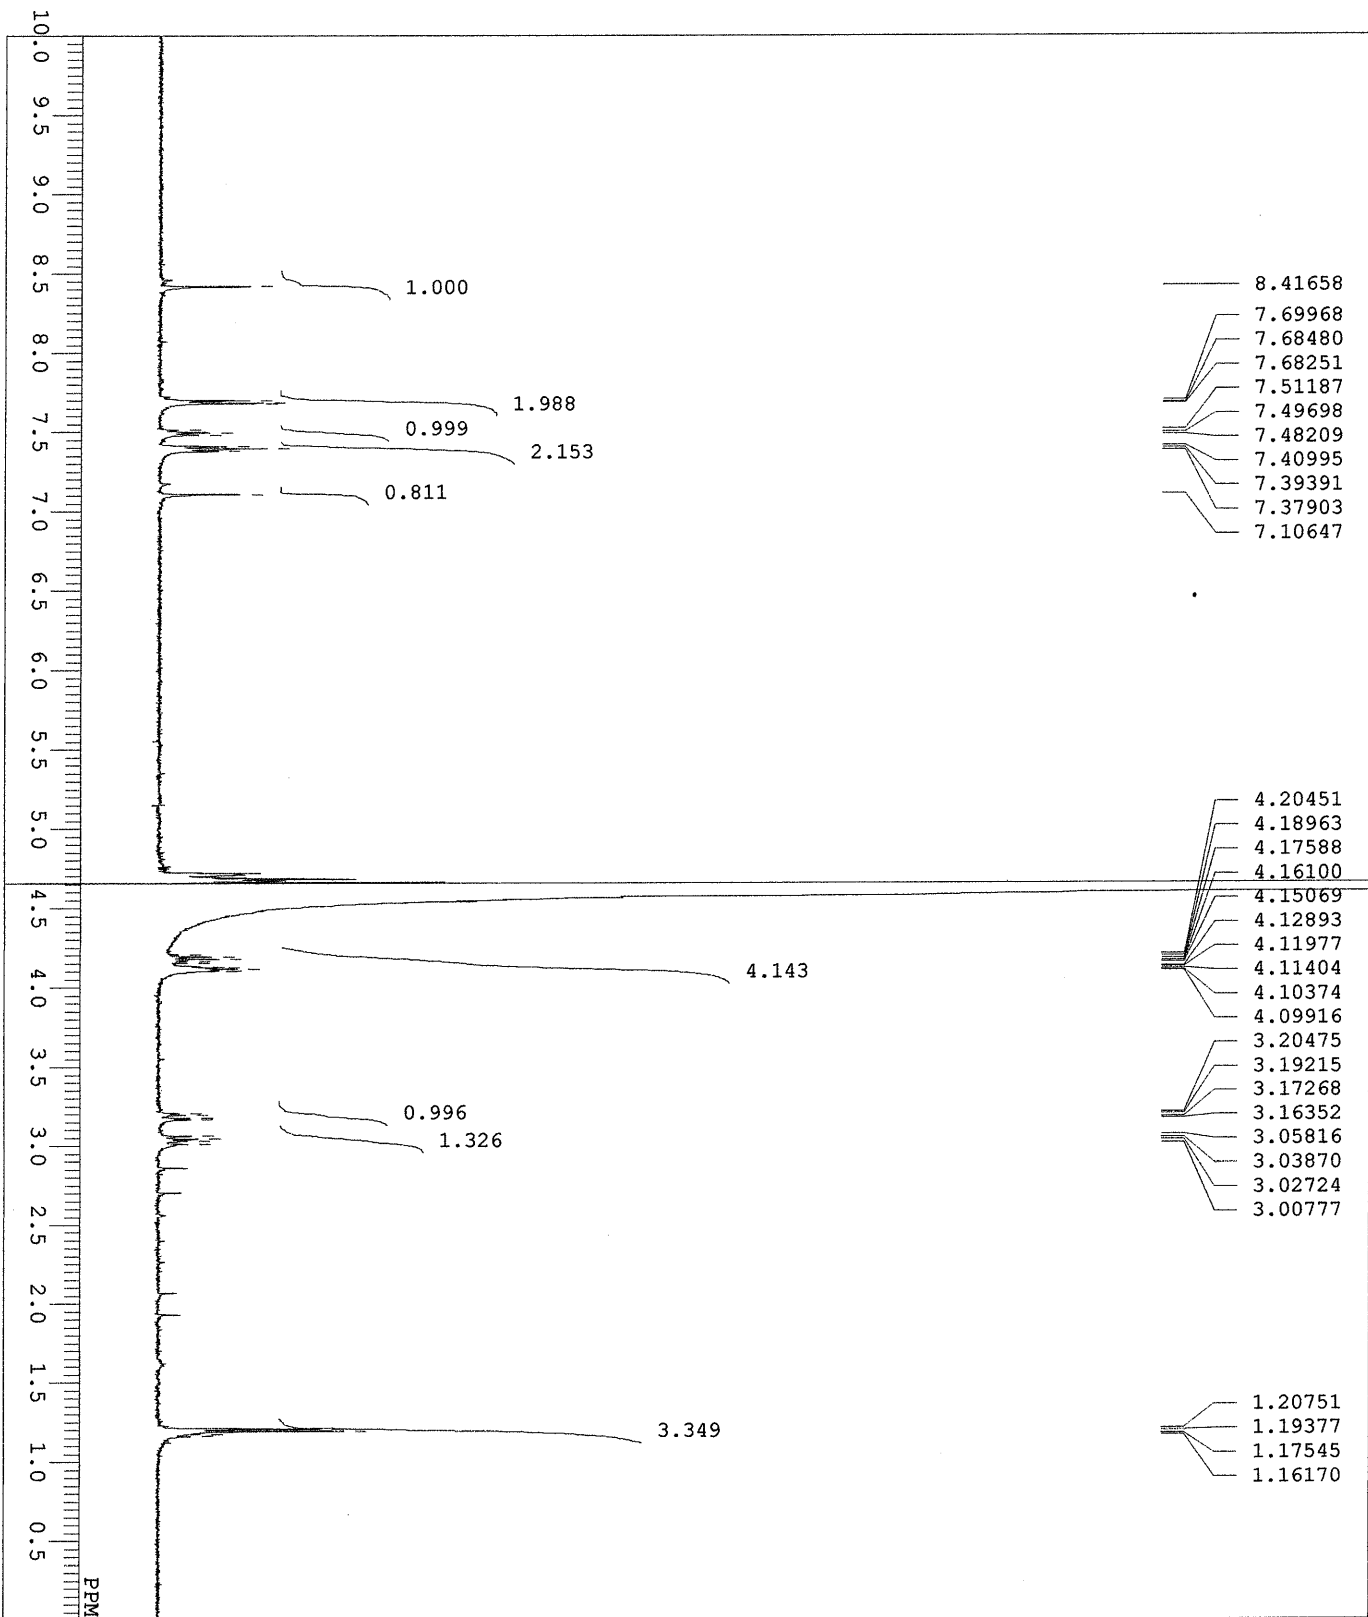

DFILE 18kd3103HPLC3-1-1.als  
 COMNT  
 DATIM 2018-09-07 13:43:39  
 OBNDC 1H  
 EXMOD proton.jxp  
 OBFRO 500.16 MHz  
 OBSFT 2.41 KHz  
 OBFIN 6.01 Hz  
 POINT 13107  
 FREOU 7507.51 Hz  
 SCANS 20  
 ACQTM 1.7459 sec  
 PD 5.0000 sec  
 PML 5.55 usec  
 IRNUC 1H  
 CTEMP 21.5 C  
 SLVNT D2O  
 EXREF 4.65 ppm  
 BF 0.12 Hz  
 RGAIN 30

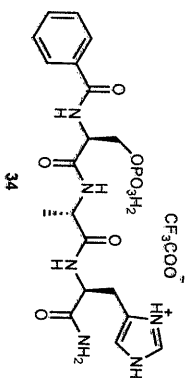

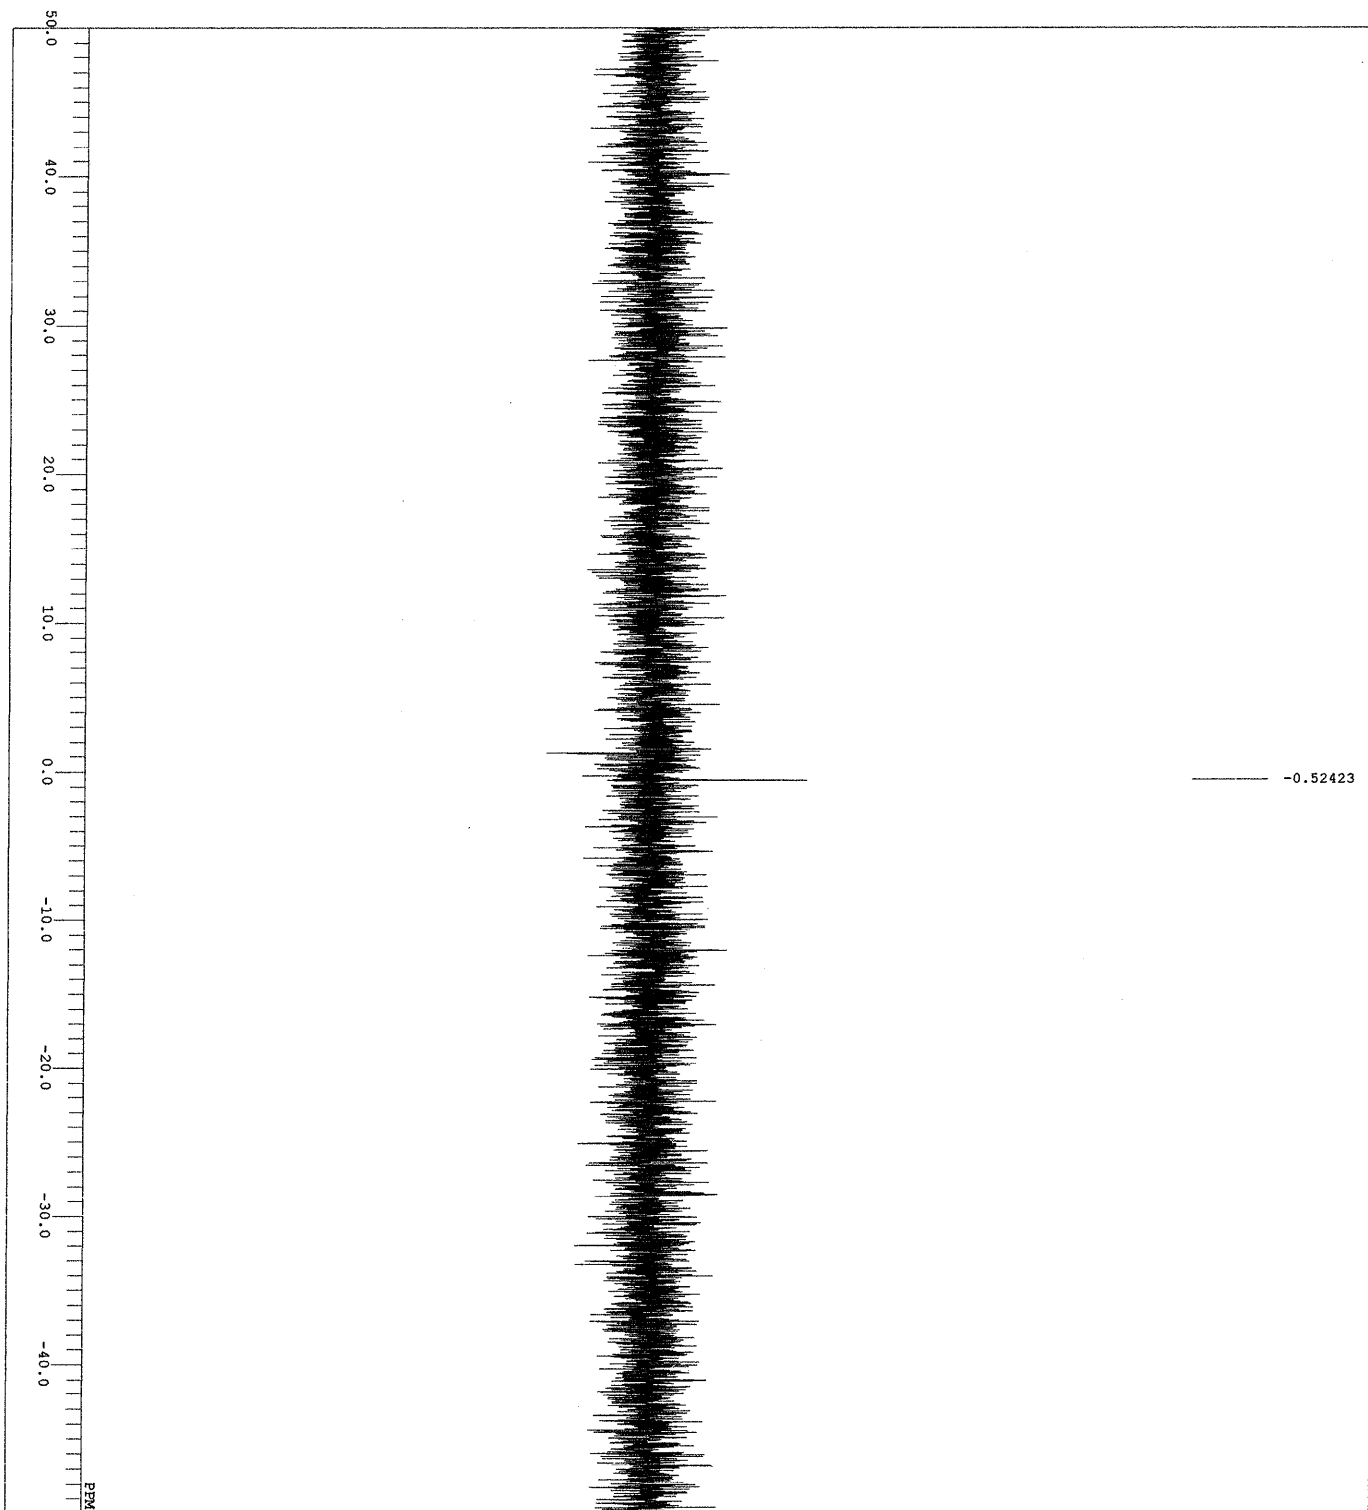

DPFILE 18k3403tm\_P-1-1.als  
 COUNT 07-03-2019 04:55:01  
 DATE 07-03-2019 04:55:01  
 EXMNUC carbon-13p  
 OBSFRC 158.59 MHz  
 OBSFV 7.99 KHz  
 OBSFN 9.23 Hz  
 POINT 25214  
 FREQ 64102.56 Hz  
 SCANS 37  
 ACQTM 0.4089 sec  
 PD 2.0000 sec  
 PUL1 4.80 usec  
 INTC 1H  
 CTEMP 20.0 C  
 SLVMT CD3OD  
 EXREF 0.00 PPM  
 BR 0.12 Hz  
 RGAIN 54

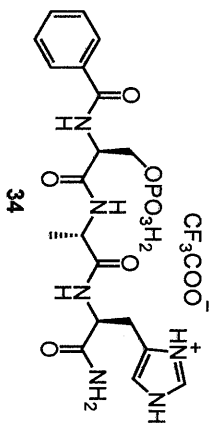

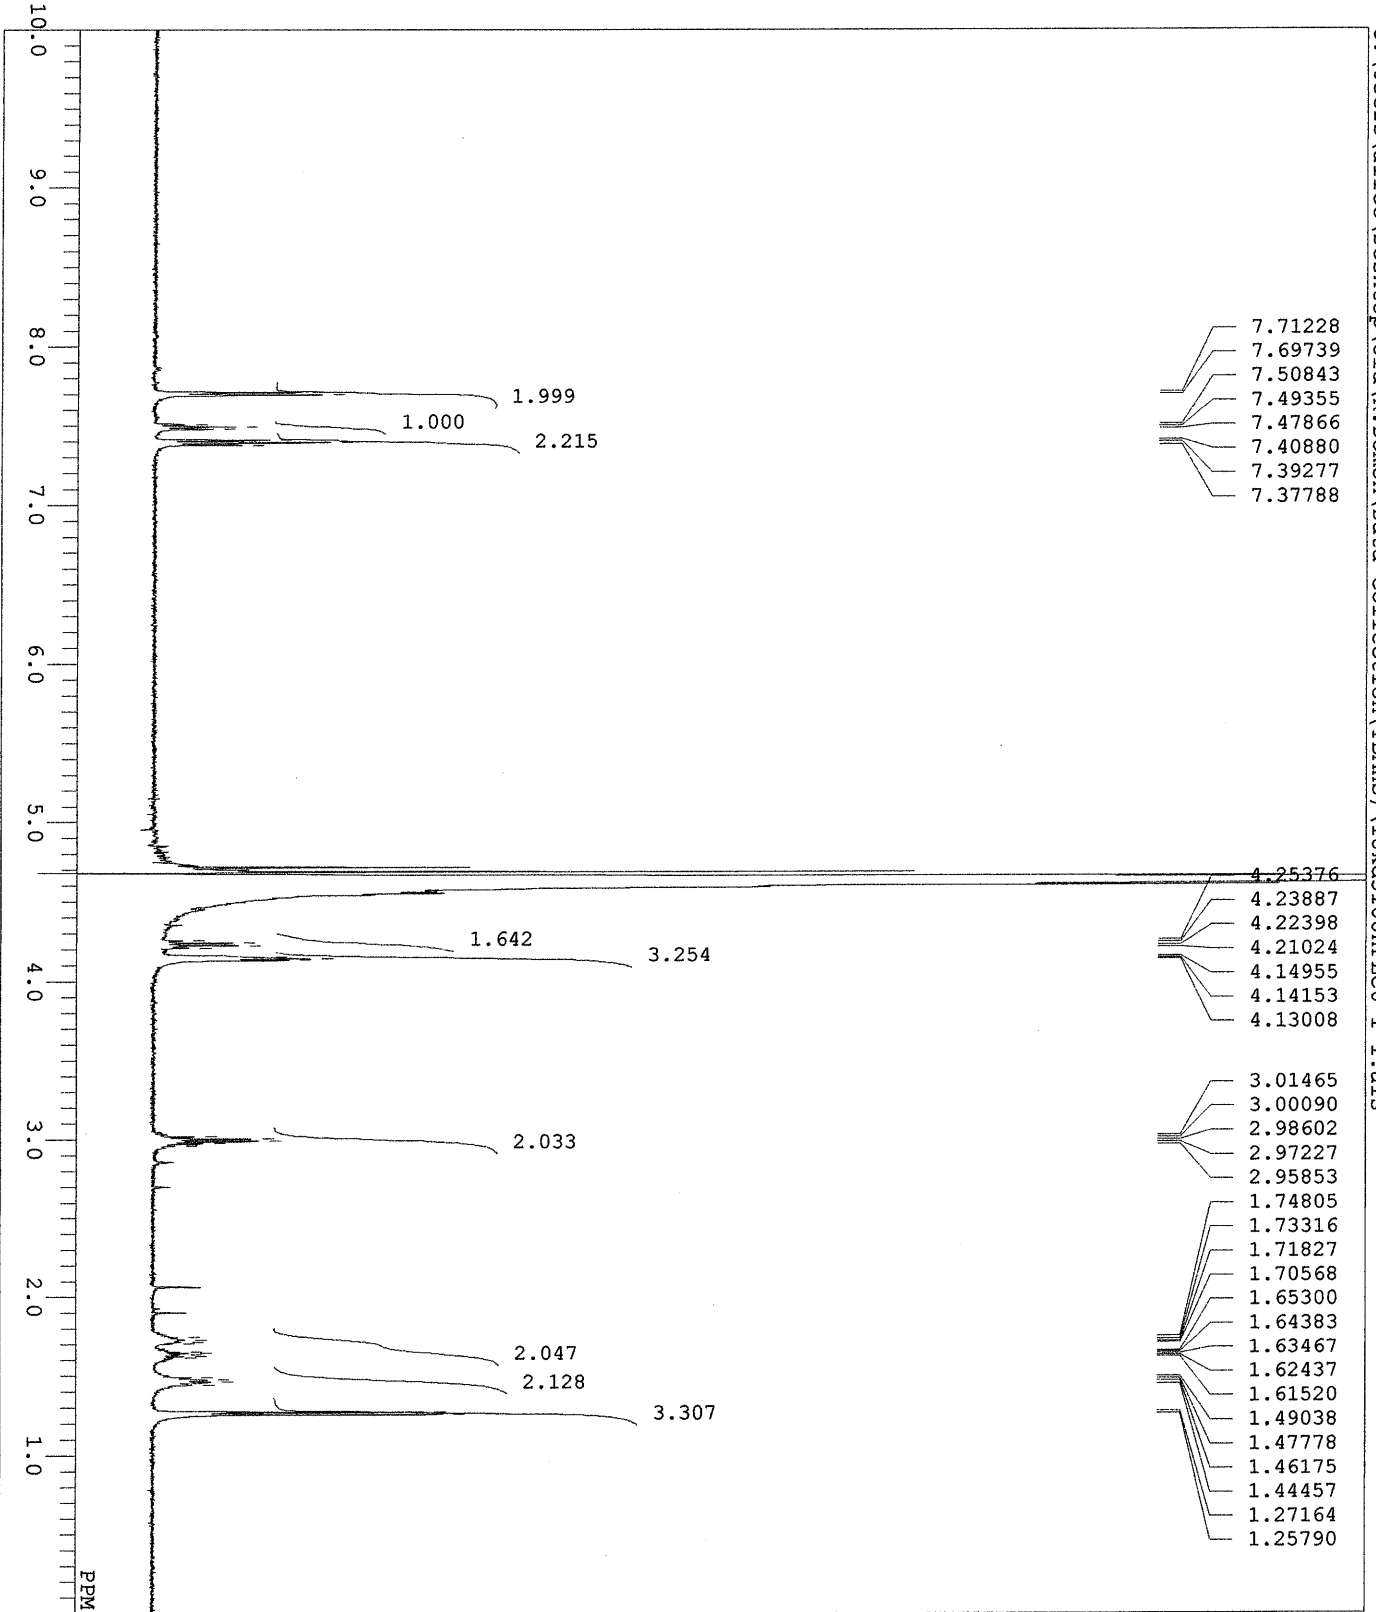

DPFILE 18kd3100HPIG6-1-1.als  
 COMMENT 2018-09-06 05:34:36  
 DATIM 1H  
 OBNUNC 1H  
 EXMOD proton.jxp  
 OBFRO 500.16 MHz  
 OBSSET 2.41 KHz  
 OBFIN 6.01 Hz  
 POINT 13107  
 FREQ0 7507.51 Hz  
 SCANS 8  
 ACQTM 1.7459 sec  
 PD 5.0000 sec  
 PW1 5.55 usec  
 IRNUC 1H  
 CTEMP 21.5 c  
 SLVNT D2O  
 EXREF 4.65 ppm  
 BF 0.12 Hz  
 RGAIN 30

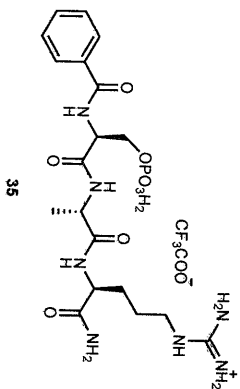

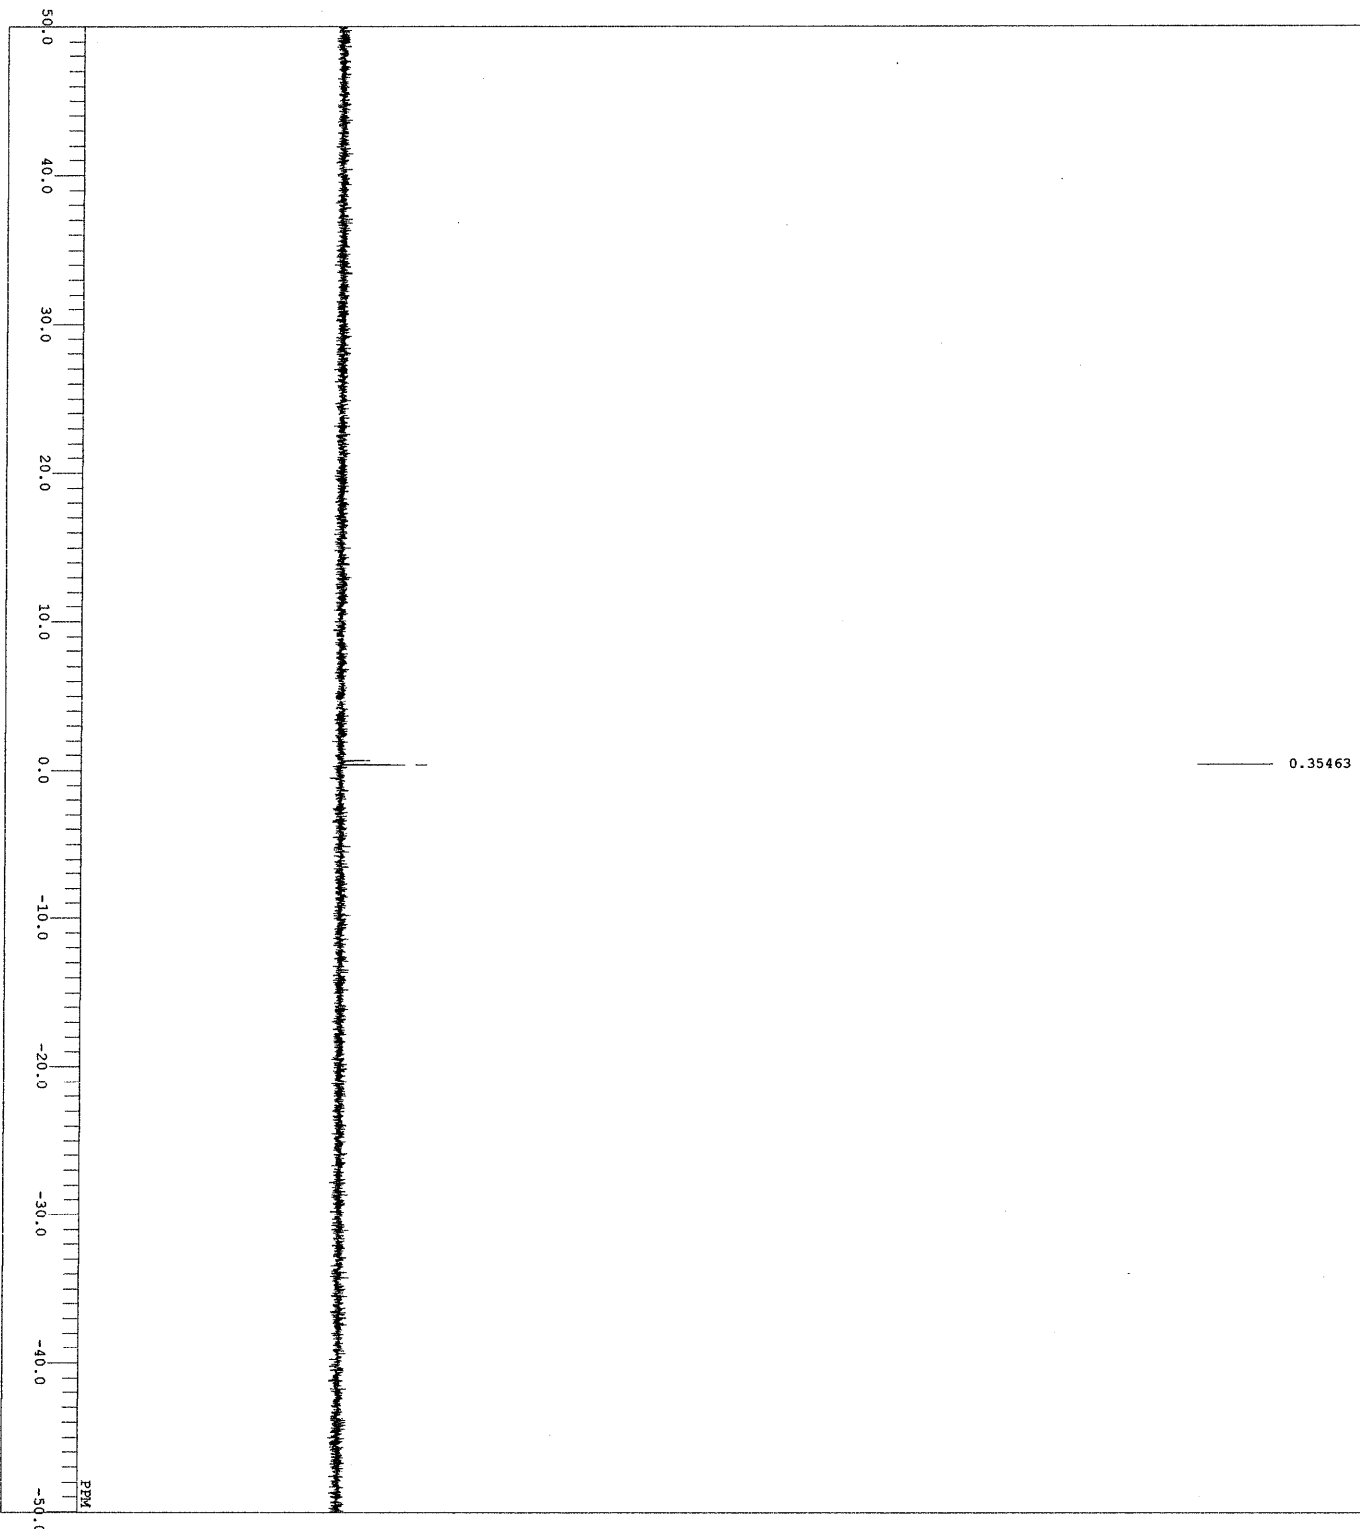

FILE 18K3019tm\_P-1-1.als  
 COMMENT  
 DATE 06-03-2019 14:41:25  
 ORBIT 31P  
 EXMOD carbon-13P  
 OBSER 159.59 MHz  
 OBSER1 7.99 MHz  
 OBSER2 9.23 Hz  
 POINT 26214  
 FREQ 64102.56 Hz  
 SCANS 11  
 ACQTM 0.4089 sec  
 PD 2.0000 sec  
 FWH 4.80 usec  
 INTC 1H  
 TEMP 19.8 c  
 SIVNT CD3OD  
 EXREF 0.00 ppm  
 BF 0.12 Hz  
 RGAIN 56

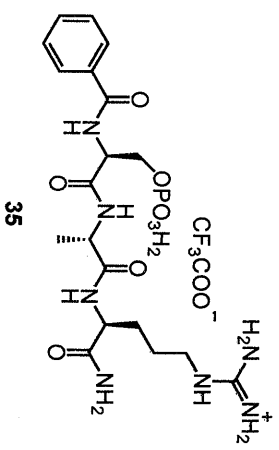

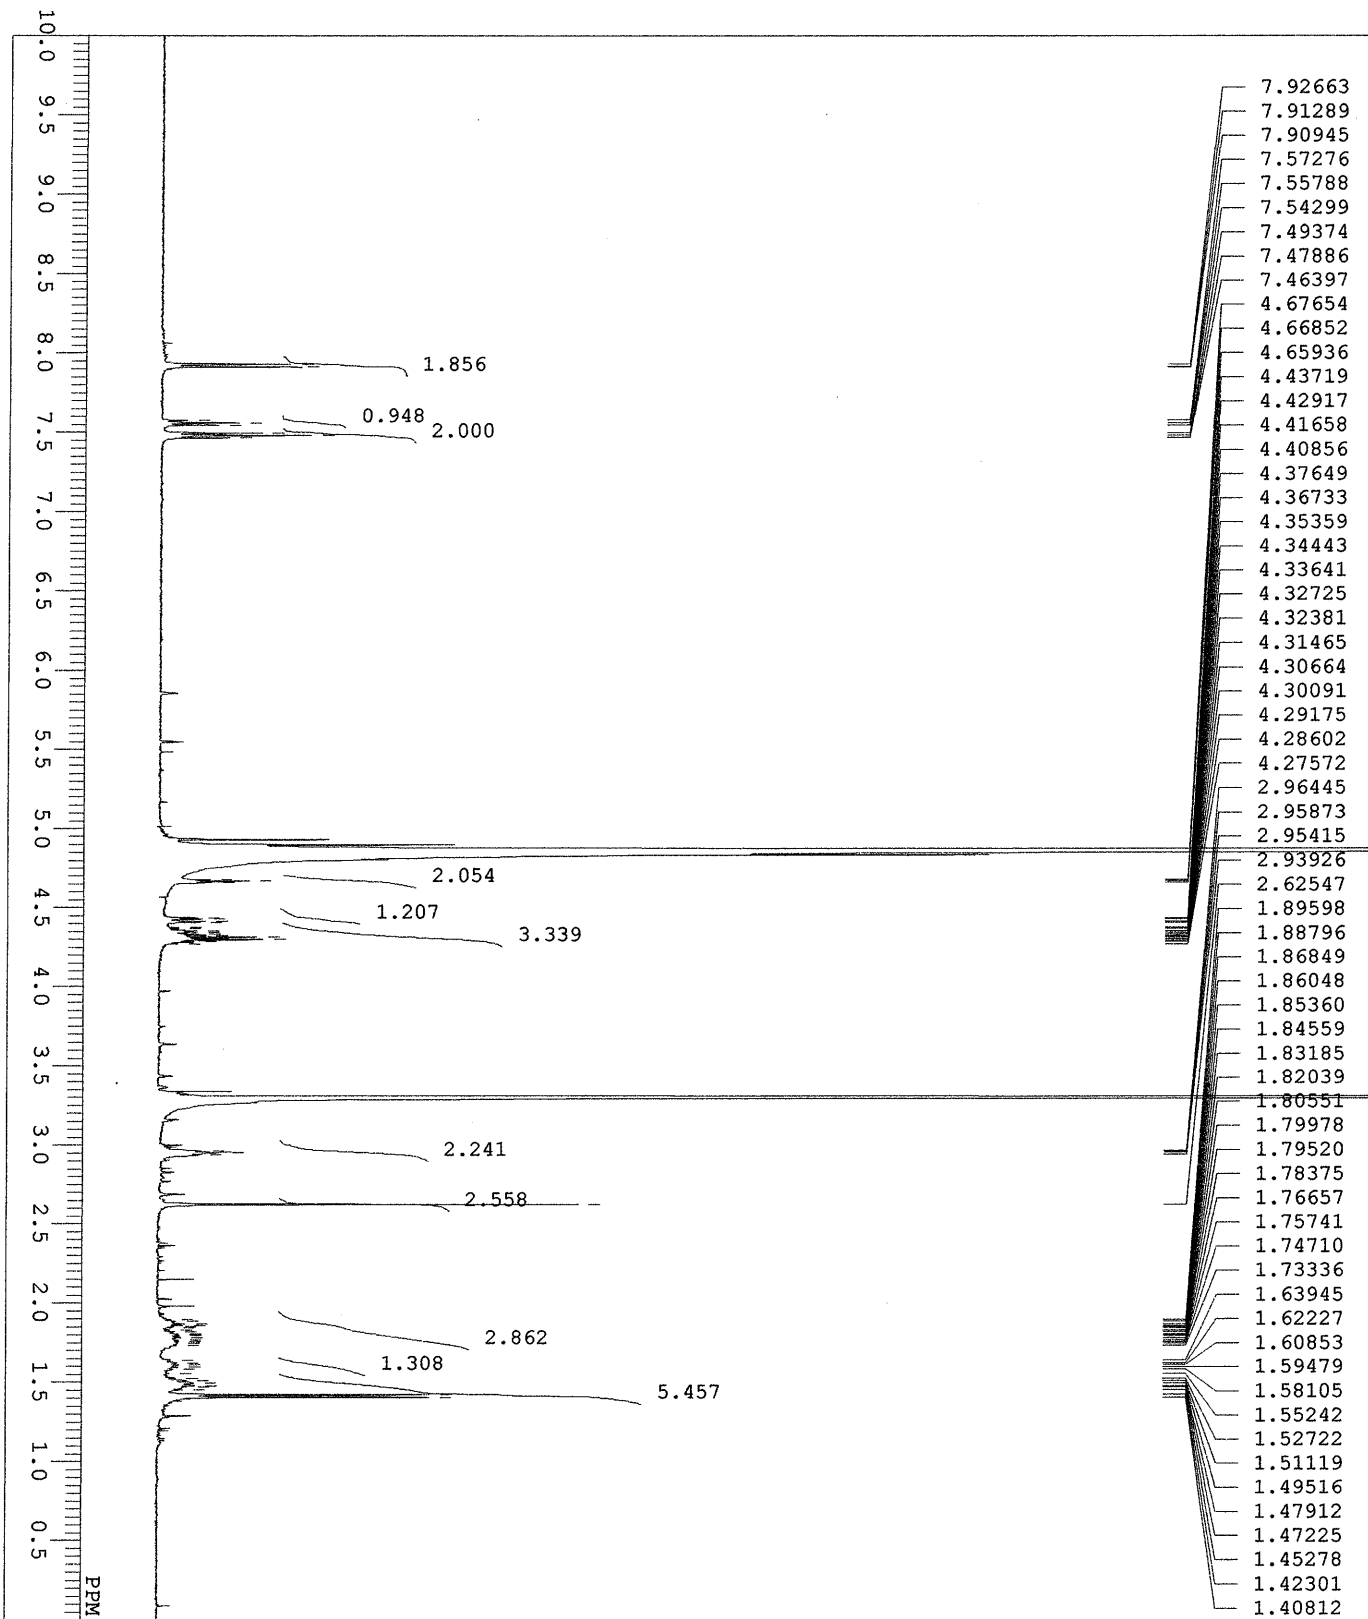

DFILE 18kd3176HPLC7-1-1.als  
 COMMENT 2018-10-02 14:51:45  
 DATIM 1H  
 OBNUC 1H  
 EXMOD proton.jxp  
 OBFRO 500.16 MHz  
 OBSSET 2.41 KHz  
 OBFIN 6.01 Hz  
 POINT 13107  
 FREQOUT 7507.51 Hz  
 SCANS 195  
 ACQTM 1.7459 sec  
 PD 5.0000 sec  
 PW1 5.55 usec  
 IRNUC 1H  
 CTEMP 21.8 C  
 SLVNT CD3OD  
 EXREF 3.30 ppm  
 BF 0.12 Hz  
 RGAIN 30

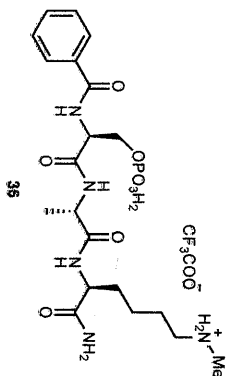

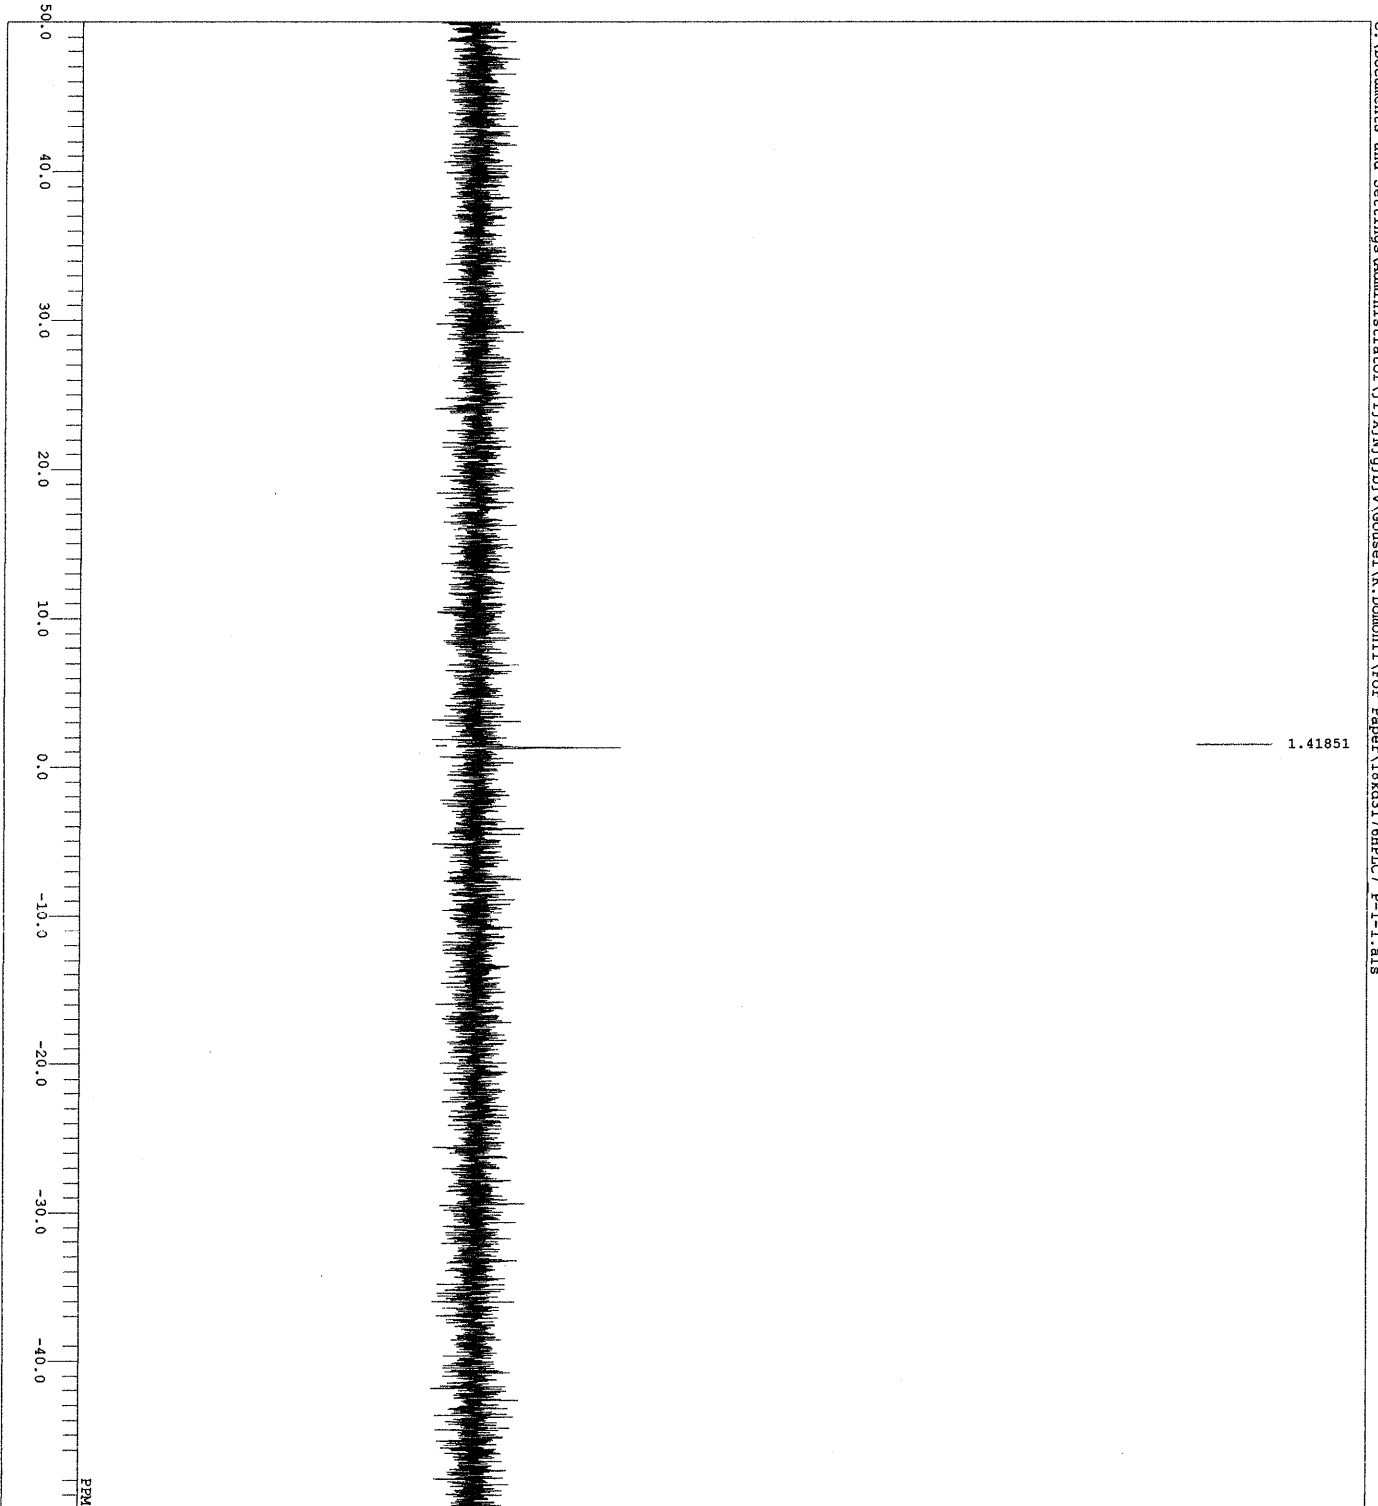

DF11E 18kd3176HPLC7\_P-1-1.als  
 COMNT 03-10-2018 21:53:46  
 DATIM 31P  
 OBNTC 31P  
 EXMOD carbon-1xp  
 OBFRO 156.59 MHz  
 OBSSE 7.99 KHz  
 OBTIN 9.23 Hz  
 POINT 26214  
 FREQU 64102.56 Hz  
 SCANS 77  
 ACQIM 0.4089 sec  
 ED 2.0000 sec  
 FWI 4.80 usec  
 INNUC 1H  
 CTENP 20.2 c  
 CP3OD 0.00 ppm  
 SIVNT 0.12 Hz  
 EXREF BF  
 REAIN 56

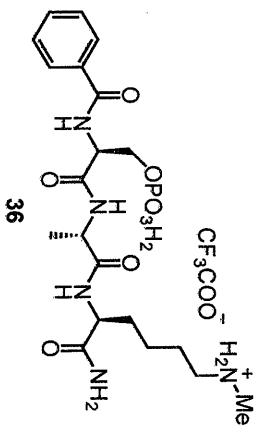

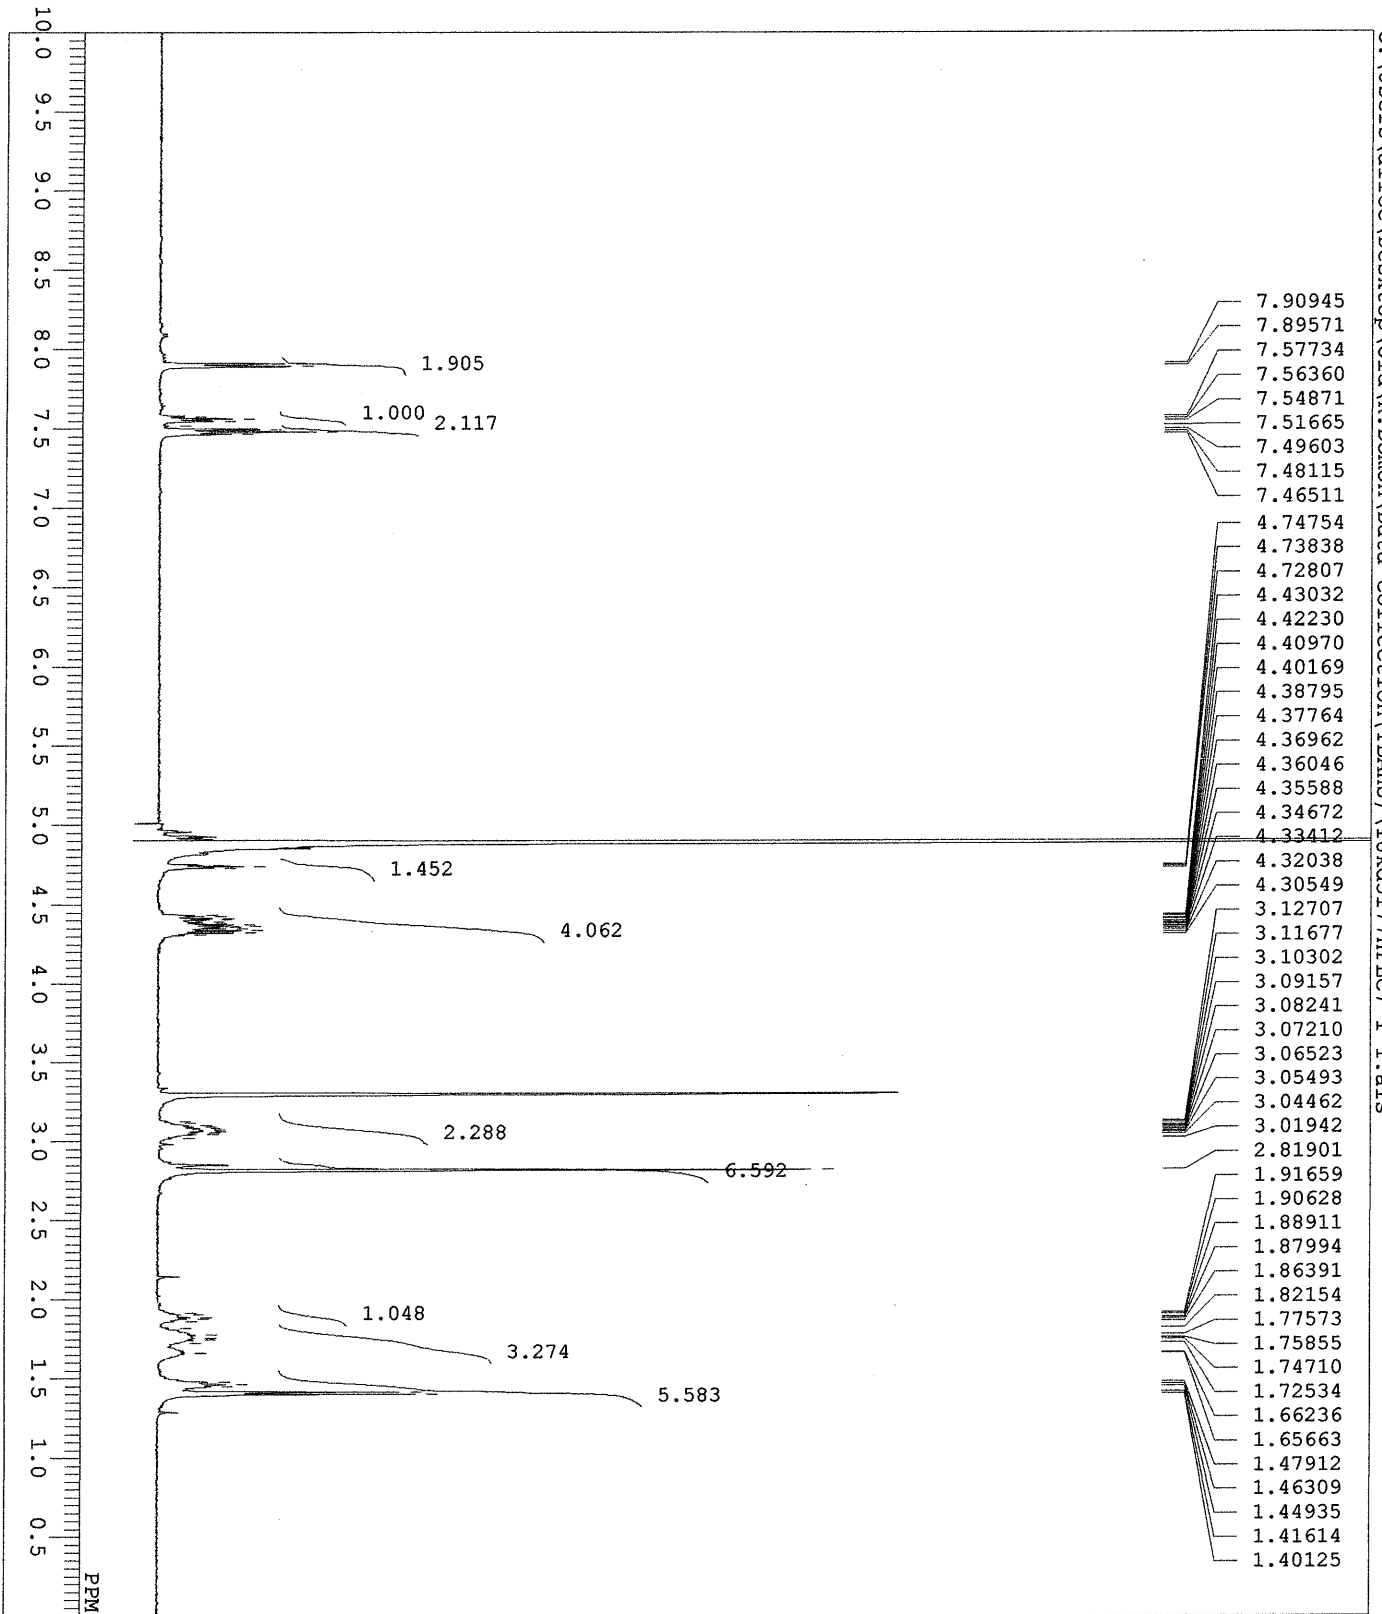

DEFILE 18kd3177HPLC7-1-1.a1s  
 COMNT 2018-10-01 04:25:33  
 DATIM 1H  
 OBNUC proton-jxp  
 EXMOD 500.16 MHz  
 OBFRO 2.41 KHz  
 OBSET 6.01 Hz  
 OBFIN 13107  
 POINT 7507.51 Hz  
 FREOU 5  
 SCANS 1.7459 sec  
 ACQTM 5.0000 sec  
 PD 5.55 usec  
 PW1 1H  
 IRNUC 21.7 C  
 CTEMP CD3OD  
 SLVNT 3.30 ppm  
 EXREF 0.12 Hz  
 BF 30  
 RGAIN

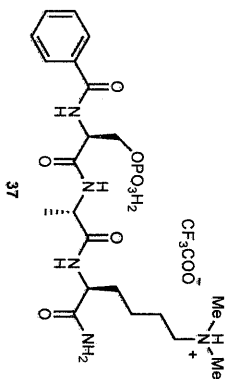



0.72467

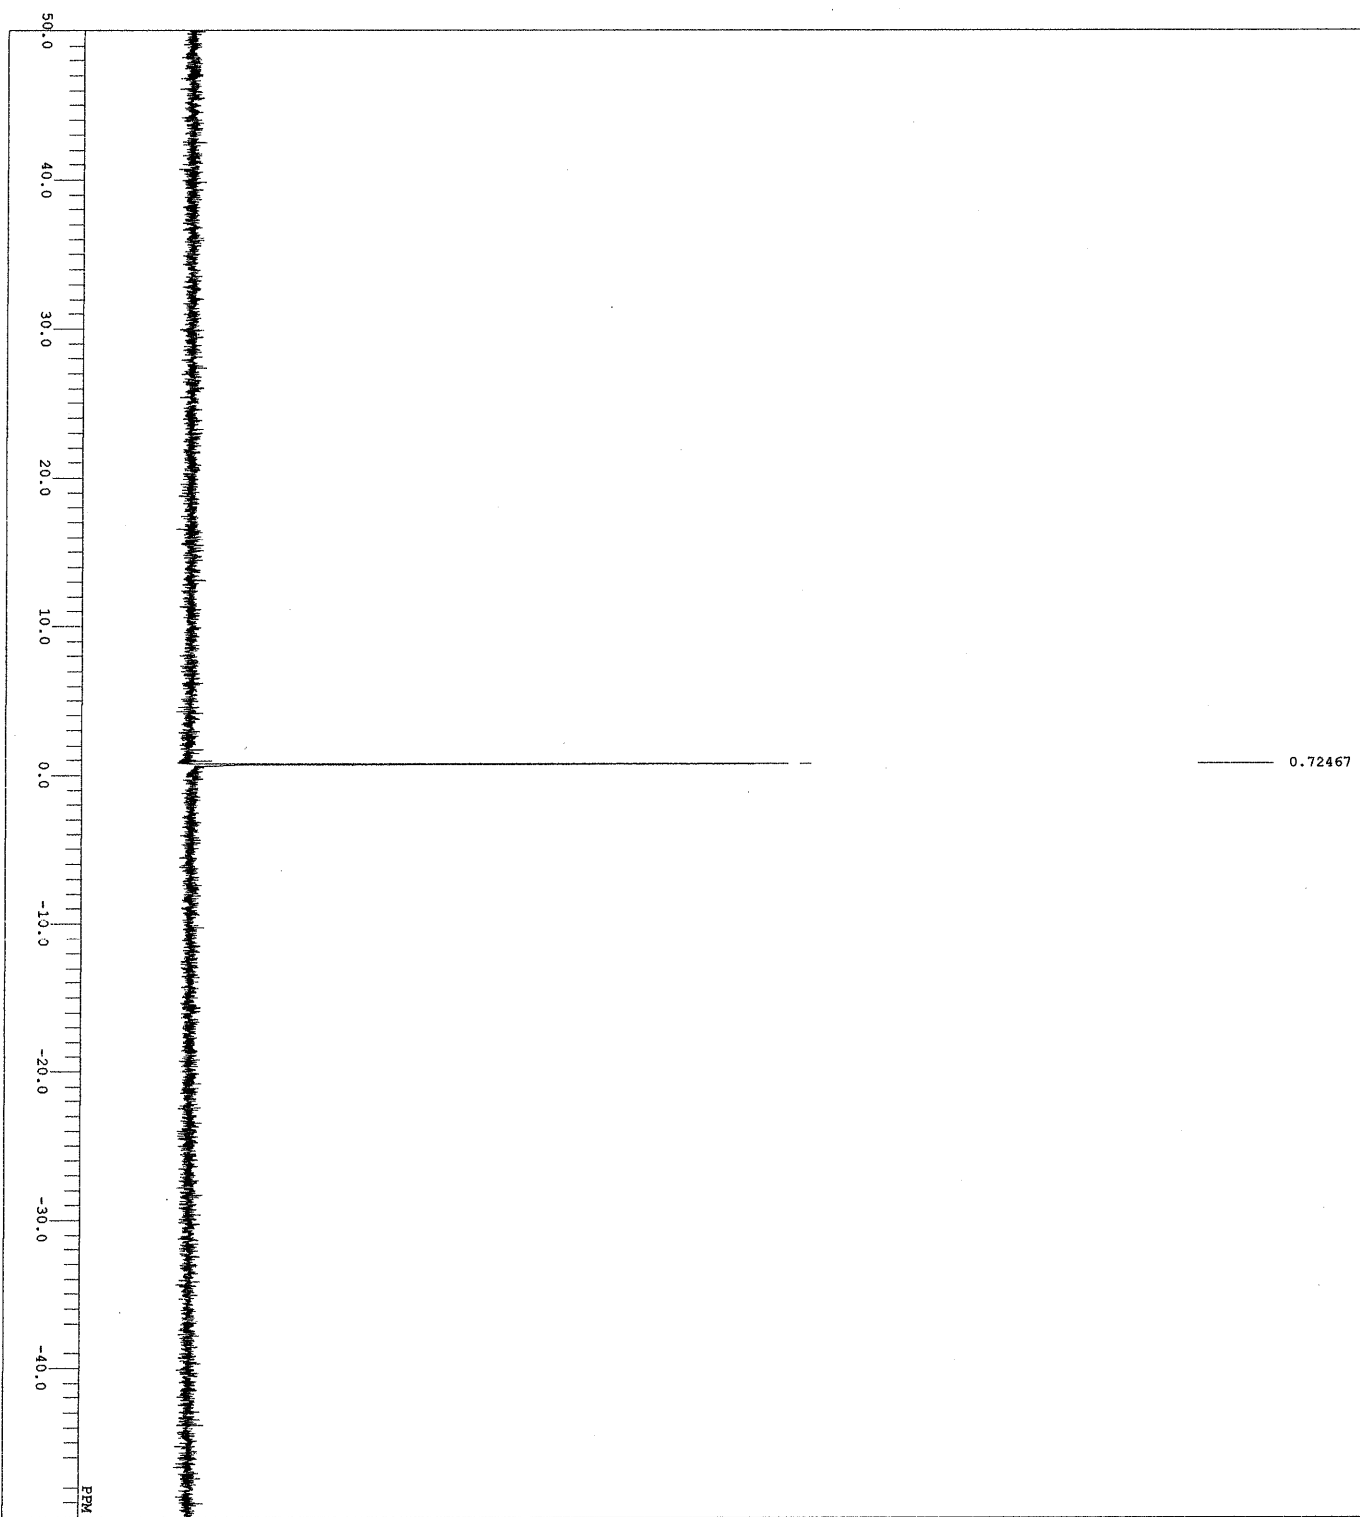

DFILE 18Kd3177HPLC7\_P-1-1.als  
 COUNT 31P  
 DATIM 03-10-2018 22:00:37  
 ORNOC 31P  
 EXMOD carbon-13p  
 OBSER 157.59 MHz  
 OBSER 7.99 KHz  
 OBSER 9.23 Hz  
 POINT 26214  
 FREQU 64102.56 Hz  
 SCANS 84  
 ACQTM 0.4089 sec  
 PD 2.0000 sec  
 PUL 4.80 usec  
 INTC 1H  
 CTEMP 20.3 c  
 STVMT CD3OD  
 EXREF 0.00 ppm  
 BF 0.12 Hz  
 RGAIN 56

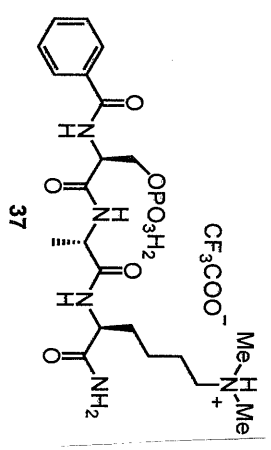

Supplement: oc9b01272_si_001.pdf [file oc9b01272_si_001.pdf]
